# Supplementary material for: Enantioselective synthesis of vicinal diamines and β-amino amides by NiH-catalyzed hydroamidation of alkenyl amides
Source: Royal Society of Chemistry journal article supplement (doi:10.1039/d4qo02275k), 2025-01-01
Supplement: d4qo02275k1.pdf [file d4qo02275k1.pdf]

## Electronic Supplementary Information (ESI)

### Enantioselective Synthesis of Vicinal Diamines and $\beta$ -Amino Amides

#### by NiH-Catalyzed Hydroamidation of Alkenyl Amides

Xun Tian,<sup>a</sup> Shengzu Duan,<sup>a,b\*</sup> Yuan Ma,<sup>a</sup> Ailin Pan,<sup>a</sup> Yamiao Meng,<sup>a</sup> Guogang Deng,<sup>a</sup> Hongbin Zhang,<sup>a</sup> and Xiaodong Yang<sup>a\*</sup>

<sup>a</sup>Key Laboratory of Medicinal Chemistry for Natural Resources, Ministry of Education; Yunnan key Laboratory of Research and Development for Natural Products; Yunnan Characteristic Plant Extraction Laboratory; School of Pharmacy, Yunnan University, Kunming, 650091 (P. R. China). E-mail: xdyang@ynu.edu.cn, duanshengzu@ynu.edu.cn

<sup>b</sup>Yunnan Key Laboratory of Chiral Functional Substance Research and Application, School of Chemistry and Environment, Yunnan Minzu University, Kunming, 650504 (P. R. China).

### TABLE OF CONTENT

|                                                                                                                |     |
|----------------------------------------------------------------------------------------------------------------|-----|
| General information .....                                                                                      | 2   |
| Preparation and characterization of <i>N</i> -allyl-amides .....                                               | 3   |
| Preparation of 1,4,2-dioxazol-5-ones .....                                                                     | 7   |
| Preparation of but-3-enamides .....                                                                            | 12  |
| Optimisation of conditions for yield and ee value of product <b>3aa</b> .....                                  | 14  |
| General procedure and characterization of NiH-catalyzed asymmetric hydroamidation of unactivated olefins ..... | 19  |
| Hydroamidation of natural products and bioactive molecules derivatives .....                                   | 37  |
| Synthesis of ( <i>S</i> )-Nicaraven .....                                                                      | 41  |
| Hydrolysis of <b>3ca</b> .....                                                                                 | 42  |
| Capture of metal-nitrenoid intermediate. ....                                                                  | 43  |
| Competitive experiment .....                                                                                   | 44  |
| X-ray crystal structure of compound <b>5ba</b> .....                                                           | 45  |
| Supplementary references .....                                                                                 | 47  |
| NMR spectra of the products .....                                                                              | 48  |
| HPLC spectra of the products .....                                                                             | 101 |

## General information

All air- and moisture-sensitive solutions and chemicals were handled under a nitrogen atmosphere of a glovebox and solutions were transferred via “Titan” brand pipettor. Anhydrous solvents, including THF (Tetrahydrofuran), 1,4-Dioxane, 2-Me-THF, DMA (*N,N*-Dimethylacetamide), MeCN (Acetonitrile), DCE (1,2-Dichloroethane), MTBE (*tert*-Butyl methyl ether), CPME (Cyclopentyl methyl ether), and DME (1,2-Dimethoxyethane) were purchased from Sigma-Aldrich and used without further purification. Unless otherwise stated, all reagents were commercially available and used as received without further purification. Nickel Catalyst was purchased from Sigma-Aldrich and used as received. Chiral ligands were purchased from Bidepharm. Other chemicals were obtained from Sigma-Aldrich, Acros, TCI, Adamas and Alfa-Aesar. TLC was performed with Merck TLC Silica gel60 F<sub>254</sub> plates with detection under UV light at 254 nm. Silica gel (200-300 mesh, Qingdao) was used for flash chromatography. <sup>1</sup>H, <sup>13</sup>C, <sup>19</sup>F and <sup>31</sup>P NMR spectra were obtained using a Brüker DRX 400/600 spectrometer at 400/600 MHz and 100/150 MHz, respectively. Chemical shifts were reported in units of parts per million (ppm) downfield from tetramethylsilane (TMS), and all coupling constants were reported in hertz. X-Ray crystal diffraction data were recorded on Brüker D8 VENTURE. High resolution mass spectra were taken on an AB QSTAR Pulsar mass spectrometer. Melting points were obtained on an XT-4 melting-point apparatus and were uncorrected. The enantiomeric excess was determined by chiral HPLC with *n*-hexane and *i*-propanol as eluents. Optical rotations were measured on a JASCO DIP-370 polarimeter.

## Preparation and characterization of *N*-allyl-amides

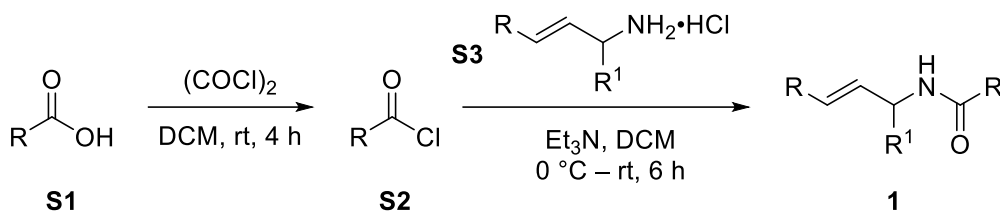

The reaction was performed following the literature procedures.<sup>[1]</sup>

**Step 1:** In a dried 100 ml round-bottom flask equipped with a magnetic stir bar, the corresponding acid **S1** (11 mmol, 1.1 equiv) was dissolved in 50ml anhydrous DCM. Then, 10 drops of anhydrous DMF were added. Under ice-bath conditions, oxalyl chloride (15 mmol, 1.5 equiv) was slowly added dropwise. After the completion of the addition, the reaction mixture was allowed to react at room temperature for 4 hours. After 4 hours, the crude product was separated from the solvent under vacuum. The obtained product **S2** was directly used for the next step reaction.

**Step 2:** In a dried 100 ml round-bottom flask equipped with a magnetic stir bar, the corresponding allylamine **S3** (10 mmol, 1.0 equiv) hydrochloride was dissolved in 50ml anhydrous DCM. Et<sub>3</sub>N (35 mmol, 3.5 equiv) was added and stirred for 5 minutes. After 5 minutes, under ice-bath conditions, the crude product **S2** (if it was a solid, dissolved in a small amount of anhydrous DCM before adding) was slowly added dropwise to the mixture. After the completion of the addition, the reaction was allowed to proceed at room temperature for 6 hours, monitored by TLC. The reaction was quenched by slowly adding saturated NaHCO<sub>3</sub> solution and the organic phase was extracted. The aqueous phase was extracted with DCM (20 ml×3), and the organic phases were combined. The combined organic phase was collected and dried over Na<sub>2</sub>SO<sub>4</sub>. The extract was filtered, concentrated, and purified by silica gel column chromatography (eluent:petroleum ether:ethyl acetate = 4:1 to 3:1) to give *N*-allyl-amides (**1**).

### *N*-Allyl-4-methoxybenzamide (**1a**)

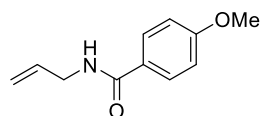

**1a** was prepared from allylamine hydrochloride and *p*-methoxybenzoic acid in 1.75 g, 92% yield as a white solid. Purification of the residue by flash chromatography on silica gel (petroleum ether : ethyl acetate = 4 : 1). The <sup>1</sup>H and <sup>13</sup>C{<sup>1</sup>H} data for this compound match the literature data.<sup>[1]</sup>

### *N*-(But-3-en-2-yl)-4-methoxybenzamide (**1b**)

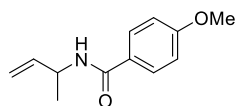

**1b** was prepared from but-3-en-2-amine hydrochloride and *p*-methoxybenzoic acid in 1.84 g, 90% yield as a white solid. Purification of the residue by flash chromatography on silica gel (petroleum ether : ethyl acetate = 4 : 1). **Mp**: 144 – 146 °C. **R<sub>f</sub>** = 0.25 (petroleum ether : ethyl acetate = 4 : 1). **<sup>1</sup>H NMR** (400 MHz, Chloroform-*d*) δ 7.82 – 7.64 (m, 2H), 7.00 – 6.84 (m, 2H), 6.03 (d, *J* = 8.4 Hz, 1H), 5.99 – 5.82 (m, 1H), 5.29 – 4.98 (m, 2H), 4.76 (m, 1H), 3.83 (s, 3H), 1.33 (d, *J* = 6.8 Hz, 3H) ppm. **<sup>13</sup>C NMR** (100 MHz, Chloroform-*d*) δ 166.3, 162.2, 139.8, 128.8, 127.1, 114.3, 113.8, 55.5, 47.2, 20.4 ppm. **HRMS** calc'd for C<sub>12</sub>H<sub>16</sub>NO<sub>2</sub><sup>+</sup> 206.1176, found 206.1179 [M+H]<sup>+</sup>.

#### (*S*)-4-Methoxy-*N*-(1-phenylbut-3-en-2-yl)benzamide (**1c**)

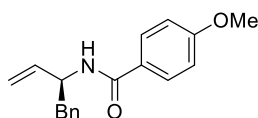

**1c** was prepared from (*S*)-1-phenylbut-3-en-2-amine hydrochloride and *p*-methoxybenzoic acid in 2.55 g, 91% yield as a white solid. Purification of the residue by flash chromatography on silica gel (petroleum ether : ethyl acetate = 4 : 1). **Mp**: 151 – 153 °C. **R<sub>f</sub>** = 0.23 (petroleum ether : ethyl acetate = 4 : 1). **<sup>1</sup>H NMR** (400 MHz, Chloroform-*d*) δ 7.72 – 7.56 (m, 2H), 7.36 – 7.27 (m, 2H), 7.26 – 7.18 (m, 3H), 6.94 – 6.84 (m, 2H), 5.99 – 5.87 (m, 2H), 5.21 – 5.09 (m, 2H), 5.03 – 4.89 (m, 1H), 3.84 (s, 3H), 2.99 (d, *J* = 6.4 Hz, 2H) ppm. **<sup>13</sup>C NMR** (100 MHz, Chloroform-*d*) δ 166.4, 162.3, 137.7, 137.3, 129.7, 128.8, 128.6, 127.0, 126.8, 115.5, 113.9, 55.6, 52.3, 41.1 ppm. **HRMS** calc'd for C<sub>18</sub>H<sub>20</sub>NO<sub>2</sub><sup>+</sup> 282.1489, found 282.1492 [M+H]<sup>+</sup>; [**α**]<sub>D</sub><sup>20</sup> = -35.11 (*c* 1.0, MeOH).

#### (*S*)-*N*-(1-Cyclohexylallyl)-4-methoxybenzamide (**1d**)

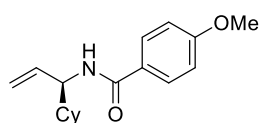

**1d** was prepared from (*S*)-1-cyclohexylprop-2-en-1-amine hydrochloride and *p*-methoxybenzoic acid in 2.45 g, 90% yield as a white solid. Purification of the residue by flash chromatography on silica gel (petroleum ether : ethyl acetate = 4 : 1). **Mp**: 155 – 157 °C. **R<sub>f</sub>** = 0.22 (petroleum ether : ethyl acetate = 4 : 1). **<sup>1</sup>H NMR** (400 MHz, Chloroform-*d*) δ 7.86 – 7.62 (m, 2H), 6.96 – 6.82 (m, 2H), 6.03 (d, *J* = 8.8 Hz, 1H), 5.83 (ddd, *J* = 17.2, 10.4, 6.0 Hz, 1H), 5.28 – 5.06 (m, 2H), 4.68 – 4.41 (m, 1H), 3.84 (s, 3H), 1.76 (m, *J* = 12.0, 9.2, 6.4 Hz, 4H), 1.70 – 1.59 (m, 1H), 1.54 (m, 1H), 1.27 – 0.99 (m, 5H) ppm. **<sup>13</sup>C NMR** (100 MHz, Chloroform-*d*) δ 166.5, 162.2, 137.2, 128.8, 127.3, 115.8, 113.9, 56.5, 55.5, 42.4, 29.6, 29.0, 26.5, 26.3, 26.2 ppm. **HRMS** calc'd for C<sub>17</sub>H<sub>24</sub>NO<sub>2</sub><sup>+</sup> 274.1802, found 274.1807 [M+H]<sup>+</sup>; [**α**]<sub>D</sub><sup>20</sup> = 24.59 (*c* 1.0, MeOH).

### **(E)-N-(But-2-en-1-yl)-4-methoxybenzamide (1e)**

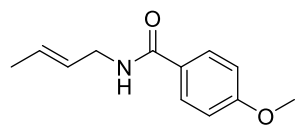

**1e** was prepared from (*E*)-but-2-en-1-amine hydrochloride and *p*-methoxybenzoic acid in 1.94 g, 95% yield as a white solid. Purification of the residue by flash chromatography on silica gel (petroleum ether : ethyl acetate = 4 : 1). The  $^1\text{H}$  and  $^{13}\text{C}\{^1\text{H}\}$  data for this compound match the literature data.<sup>[2]</sup>

### **tert-Butyl allylcarbamate (1f)**

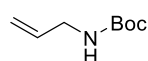

**1f** was prepared from allylamine hydrochloride and di-*tert*-butyl dicarbonate in 1.54 g, 98% yield as a Colorless oil. Purification of the residue by flash chromatography on silica gel (petroleum ether : ethyl acetate = 4 : 1). Synthetic method and the  $^1\text{H}$  and  $^{13}\text{C}\{^1\text{H}\}$  data for this compound match the literature data.<sup>[3]</sup>

### **(S)-N-Allyl-2-(6-methoxynaphthalen-2-yl)propanamide (1g)**

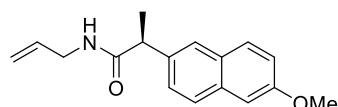

**1g** was prepared from allylamine hydrochloride and (*S*)-Naproxen in 2.50 g, 93% yield as a white solid. Purification of the residue by flash chromatography on silica gel (petroleum ether : ethyl acetate = 4 : 1). The  $^1\text{H}$  and  $^{13}\text{C}\{^1\text{H}\}$  data for this compound match the literature data.<sup>[4]</sup>

### **N-Allyl-2-(11-oxo-6,11-dihydrodibenzo[b,e]oxepin-3-yl)acetamide (1h)**

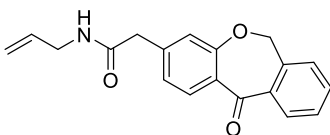

**1h** was prepared from allylamine hydrochloride and Isoxepac in 2.76 g, 90% yield as a white solid. Purification of the residue by flash chromatography on silica gel (petroleum ether : ethyl acetate = 4 : 1).

**Mp:** 182 – 184 °C. **R<sub>f</sub>** = 0.20 (petroleum ether : ethyl acetate = 4 : 1).  **$^1\text{H}$  NMR** (400 MHz, Chloroform-*d*)  $\delta$  8.10 (d, *J* = 2.4 Hz, 1H), 7.89 (dd, *J* = 7.8, 1.2 Hz, 1H), 7.57 (td, *J* = 7.2, 1.2 Hz, 1H), 7.52 – 7.42 (m, 2H), 7.42 – 7.34 (m, 1H), 7.06 (d, *J* = 8.4 Hz, 1H), 5.97 – 5.69 (m, 1H), 5.53 (s, 1H), 5.20 (s, 2H), 5.11 (dq, *J* = 6.0, 1.6 Hz, 1H), 5.07 (t, *J* = 1.6 Hz, 1H), 3.86 (m, 2H), 3.59 (s, 2H) ppm.  **$^{13}\text{C}$  NMR** (100 MHz, Chloroform-*d*)  $\delta$  191.0, 170.5, 160.8, 140.5, 136.6, 135.6, 134.1, 133.1, 132.6, 129.6, 129.5, 128.8, 128.0, 125.5, 121.8, 116.6, 73.8, 42.9, 42.2 ppm. **HRMS** calc'd for  $\text{C}_{19}\text{H}_{18}\text{NO}_3^+$  308.1281, found 308.1280  $[\text{M}+\text{H}]^+$ .

### **N-Allyl-2-(1-(4-chlorobenzoyl)-5-methoxy-2-methyl-1H-indol-3-yl)acetamide (1i)**

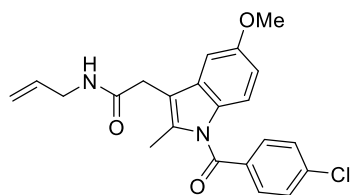

**1i** was prepared from allylamine hydrochloride and Indometacin in 3.48 g, 88% yield as a white solid. Purification of the residue by flash chromatography on silica gel (petroleum ether : ethyl acetate = 3 : 1). The  $^1\text{H}$  and  $^{13}\text{C}\{^1\text{H}\}$  data for this compound match the

literature data.<sup>[4]</sup>

### 2-(Allylcarbamoyl)phenyl acetate (**1j**)

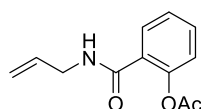

**1j** was prepared from allylamine hydrochloride and Aspirin in 1.97 g, 90% yield as a white solid. Purification of the residue by flash chromatography on silica gel (petroleum ether : ethyl acetate = 3 : 1). **Mp**: 61 – 63 °C. **R<sub>f</sub>** = 0.28 (petroleum

ether : ethyl acetate = 3 : 1).  **$^1\text{H}$  NMR** (400 MHz, Chloroform-*d*)  $\delta$  8.10 (d,  $J$  = 2.4 Hz, 1H), 7.89 (dd,  $J$  = 7.6, 1.2 Hz, 1H), 7.57 (td,  $J$  = 7.2, 1.2 Hz, 1H), 7.52 – 7.42 (m, 2H), 7.42 – 7.34 (m, 1H), 7.06 (d,  $J$  = 8.4 Hz, 1H), 5.97 – 5.69 (m, 1H), 5.53 (s, 1H), 5.20 (s, 2H), 5.11 (dq,  $J$  = 6.0, 1.6 Hz, 1H), 5.07 (t,  $J$  = 1.6 Hz, 1H), 3.86 (m, 2H), 3.59 (s, 2H).  **$^{13}\text{C}$  NMR** (100 MHz, Chloroform-*d*)  $\delta$  191.0, 170.5, 160.8, 140.5, 136.6, 135.6, 134.1, 133.1, 132.6, 129.6, 129.5, 128.8, 128.0, 125.5, 121.8, 116.6, 73.8, 42.9, 42.2. **HRMS** calc'd for  $\text{C}_{12}\text{H}_{14}\text{NO}_3^+$  220.0968, found 220.0966  $[\text{M}+\text{H}]^+$ .

### *N*-Allylnicotinamide (**1k**)

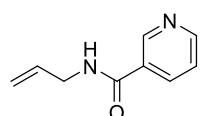

**1k** was prepared from allylamine hydrochloride and nicotinic acid in 1.39 g, 86% yield as a white solid. Purification of the residue by flash chromatography on silica gel (petroleum ether : ethyl acetate = 4 : 1). The  $^1\text{H}$  and  $^{13}\text{C}\{^1\text{H}\}$  data for this

compound match the literature data.<sup>[5]</sup>

## Preparation of 1,4,2-dioxazol-5-ones

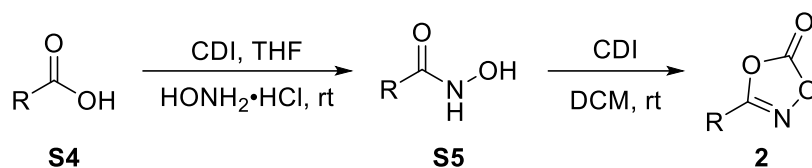

The reaction was performed following the literature procedures.<sup>[6]</sup>

**Step 1:** To a solution of corresponding carboxylic acid **S4** (10 mmol) in 40 ml anhydrous THF was added 1,1'-carbon-ylldiimidazole (CDI, 15 mmol, 1.5 equiv). The reaction mixture was stirred for 1 h before hydroxylamine hydrochloride (20 mmol, 2.0 equiv) was added. The resulting mixture was stirred overnight. The mixture was diluted with 5% aq KHSO<sub>4</sub> (20 mL) and extracted with ethyl acetate. The combined organic phase was washed with brine (30 mL) and dried over anhydrous Na<sub>2</sub>SO<sub>4</sub>. The extract was filtered and concentrated to give the residue **S5** that was used directly for the next step.

**Step 2:** To a solution of unpurified hydroxamic acid **S5** (10 mmol) in dry DCM (40 mL) was added CDI (11mmol, 1.1 equiv). The mixture was stirred for 5 min to 1 h until the reaction was completed. 2 N HCl solution (20 mL) was added and extracted with DCM. The combined organic phase was collected and dried over Na<sub>2</sub>SO<sub>4</sub>. The extract was filtered, concentrated, and purified by silica gel column chromatography (eluent: petroleum ether : ethyl acetate = 10 : 1 to 5 : 1) to give 3-substituted-1,4,2-dioxazol-5-ones (**2**).

### 3-Phenyl-1,4,2-dioxazol-5-one (2a)

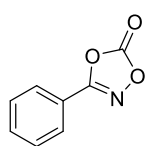

**2a** was prepared from benzoic acid in 1.31 g, 80% yield as a white solid. Purification of the residue by flash chromatography on silica gel (petroleum ether : ethyl acetate = 10 : 1). The <sup>1</sup>H and <sup>13</sup>C{<sup>1</sup>H} data for this compound match the literature data.<sup>[7]</sup>

### 3-(*o*-Tolyl)-1,4,2-dioxazol-5-one (2b)

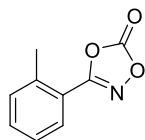

**2b** was prepared from 2-methylbenzoic acid in 1.47 g, 83% yield as a white solid. Purification of the residue by flash chromatography on silica gel (petroleum ether : ethyl acetate = 10 : 1). The <sup>1</sup>H and <sup>13</sup>C{<sup>1</sup>H} data for this compound match the literature data.<sup>[7]</sup>

### 3-(2-Methoxyphenyl)-1,4,2-dioxazol-5-one (2c)

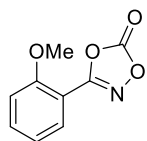

**2c** was prepared from 2-methoxybenzoic acid in 1.58 g, 82% yield as a white solid.

Purification of the residue by flash chromatography on silica gel (petroleum ether : ethyl acetate = 10 : 1). The  $^1\text{H}$  and  $^{13}\text{C}\{^1\text{H}\}$  data for this compound match the literature data.<sup>[8]</sup>

### 3-(*m*-Tolyl)-1,4,2-dioxazol-5-one (2d)

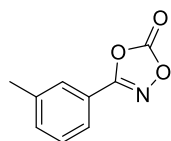

**2d** was prepared from 3-methylbenzoic acid in 1.51 g, 85% yield as a white solid.

Purification of the residue by flash chromatography on silica gel (petroleum ether : ethyl acetate = 10 : 1). The  $^1\text{H}$  and  $^{13}\text{C}\{^1\text{H}\}$  data for this compound match the literature data.<sup>[7]</sup>

### 3-(3-Methoxyphenyl)-1,4,2-dioxazol-5-one (2e)

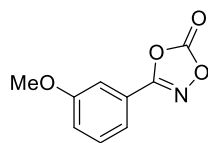

**2e** was prepared from 3-methoxybenzoic acid in 1.60 g, 84% yield as a white solid.

Purification of the residue by flash chromatography on silica gel (petroleum ether : ethyl acetate = 10 : 1). The  $^1\text{H}$  and  $^{13}\text{C}\{^1\text{H}\}$  data for this compound match the literature data.<sup>[9]</sup>

### 3-(4-(*tert*-Butyl)phenyl)-1,4,2-dioxazol-5-one (2f)

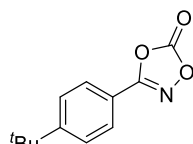

**2f** was prepared from 4-(*tert*-butyl)benzoic acid in 1.75 g, 80% yield as a white solid.

Purification of the residue by flash chromatography on silica gel (petroleum ether : ethyl acetate = 10 : 1). The  $^1\text{H}$  and  $^{13}\text{C}\{^1\text{H}\}$  data for this compound match the literature data.<sup>[9]</sup>

### 3-(4-Methoxyphenyl)-1,4,2-dioxazol-5-one (2g)

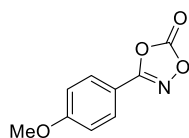

**2g** was prepared from 4-methoxybenzoic acid in 1.58 g, 82% yield as a white solid.

Purification of the residue by flash chromatography on silica gel (petroleum ether : ethyl acetate = 10 : 1). The  $^1\text{H}$  and  $^{13}\text{C}\{^1\text{H}\}$  data for this compound match the literature data.<sup>[7]</sup>

### 3-(4-Fluorophenyl)-1,4,2-dioxazol-5-one (2h)

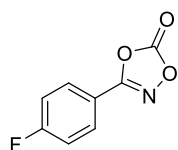

**2h** was prepared from 4-fluorobenzoic acid in 1.35 g, 75% yield as a white solid.

Purification of the residue by flash chromatography on silica gel (petroleum ether : ethyl acetate = 10 : 1). The  $^1\text{H}$  and  $^{13}\text{C}\{^1\text{H}\}$  data for this compound match the literature data.<sup>[8]</sup>

### 3-(4-Chlorophenyl)-1,4,2-dioxazol-5-one (2i)

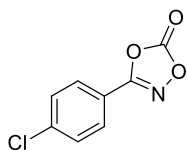

**2i** was prepared from 4-chlorobenzoic acid in 1.73 g, 78% yield as a white solid.

Purification of the residue by flash chromatography on silica gel (petroleum ether : ethyl acetate = 10 : 1). The  $^1\text{H}$  and  $^{13}\text{C}\{^1\text{H}\}$  data for this compound match the literature data.<sup>[8]</sup>

### 3-(4-Bromophenyl)-1,4,2-dioxazol-5-one (2j)

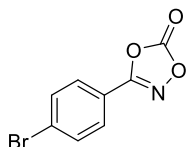

**2j** was prepared from 4-bromobenzoic acid in 1.92 g, 80% yield as a white solid.

Purification of the residue by flash chromatography on silica gel (petroleum ether : ethyl acetate = 10 : 1). The  $^1\text{H}$  and  $^{13}\text{C}\{^1\text{H}\}$  data for this compound match the literature data.<sup>[9]</sup>

### 3-(4-(Trifluoromethoxy)phenyl)-1,4,2-dioxazol-5-one (2k)

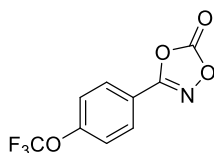

**2k** was prepared from 4-(trifluoromethoxy)benzoic acid in 1.92 g, 78% yield as a white solid. Purification of the residue by flash chromatography on silica gel (petroleum ether : ethyl acetate = 10 : 1). The  $^1\text{H}$  and  $^{13}\text{C}\{^1\text{H}\}$  data for this

compound match the literature data.<sup>[10]</sup>

### 3-(Thiophen-2-yl)-1,4,2-dioxazol-5-one (2l)

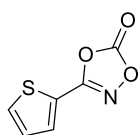

**2l** was prepared from thiophene-2-carboxylic acid in 1.34 g, 80% yield as a white solid.

Purification of the residue by flash chromatography on silica gel (petroleum ether : ethyl acetate = 10 : 1). The  $^1\text{H}$  and  $^{13}\text{C}\{^1\text{H}\}$  data for this compound match the literature data.<sup>[7]</sup>

### 3-(4-((Trifluoromethyl)thio)phenyl)-1,4,2-dioxazol-5-one (2m)

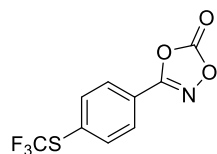

**2m** was prepared from 4-((trifluoromethyl)thio)benzoic acid in 1.78 g, 68% yield as a white solid. Purification of the residue by flash chromatography on silica gel (petroleum ether : ethyl acetate = 10 : 1). The  $^1\text{H}$  and  $^{13}\text{C}\{^1\text{H}\}$  data for this compound match the literature data.<sup>[11]</sup>

### 3-(Benzo[d][1,3]dioxol-5-yl)-1,4,2-dioxazol-5-one (2n)

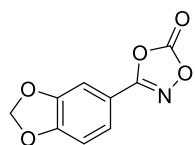

**2n** was prepared from benzo[d][1,3]dioxole-5-carboxylic acid in 1.71 g, 83% yield as a white solid. Purification of the residue by flash chromatography on silica gel (petroleum ether : ethyl acetate = 5 : 1). The  $^1\text{H}$  and  $^{13}\text{C}\{^1\text{H}\}$  data for this compound match the literature data.<sup>[9]</sup>

### 3-(tert-Butyl)-1,4,2-dioxazol-5-one (2o)

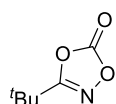

**2o** was prepared from pivalic acid in 1.17 g, 82% yield as a colourless liquid. Purification of the residue by flash chromatography on silica gel (petroleum ether : ethyl acetate = 10 : 1). The  $^1\text{H}$  and  $^{13}\text{C}\{^1\text{H}\}$  data for this compound match the literature data.<sup>[11]</sup>

### 3-(2-(4,5-Diphenyloxazol-2-yl)ethyl)-1,4,2-dioxazol-5-one (2p)

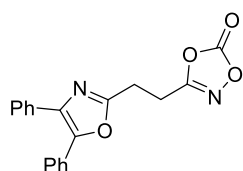

**2p** was prepared from Oxaprozin in 2.51 g, 78% yield as a white solid. Purification of the residue by flash chromatography on silica gel (petroleum ether : ethyl acetate = 5 : 1). The  $^1\text{H}$  and  $^{13}\text{C}\{^1\text{H}\}$  data for this compound match the literature data.<sup>[12]</sup>

### (S)-3-(1-(4-Isobutylphenyl)ethyl)-1,4,2-dioxazol-5-one (2q)

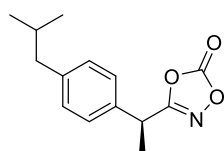

**2q** was prepared from (*S*)-Ibuprofen in 2.05 g, 83% yield as a white solid. Purification of the residue by flash chromatography on silica gel (petroleum ether : ethyl acetate = 10 : 1). The  $^1\text{H}$  and  $^{13}\text{C}\{^1\text{H}\}$  data for this compound match the literature data.<sup>[6]</sup>

### 3-(Pyridin-3-yl)-1,4,2-dioxazol-5-one (2r)

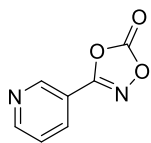

**2r** was prepared from nicotinic acid in 0.98 g, 64% yield as a white solid. Purification of the residue by flash chromatography on silica gel (petroleum ether : ethyl acetate = 5 : 1). **Mp:** 51 – 53 °C. **R<sub>f</sub>** = 0.46 (petroleum ether : ethyl acetate = 5 : 1). **<sup>1</sup>H NMR** (400 MHz, Chloroform-*d*) δ 9.11 (d, *J* = 2.4 Hz, 1H), 8.89 (dd, *J* = 4.8, 1.6 Hz, 1H), 8.16 (dt, *J* = 8.0, 2.0 Hz, 1H), 7.52 (dd, *J* = 8.0, 4.8 Hz, 1H) ppm. **<sup>13</sup>C NMR** (100 MHz, Chloroform-*d*) δ 162.1, 154.5, 153.4, 147.8, 134.0, 124.1, 117.1 ppm. **HRMS** calc'd for C<sub>7</sub>H<sub>5</sub>N<sub>2</sub>O<sub>3</sub><sup>+</sup> 165.0295, found 165.0296 [M+H]<sup>+</sup>

## Preparation of but-3-enamides

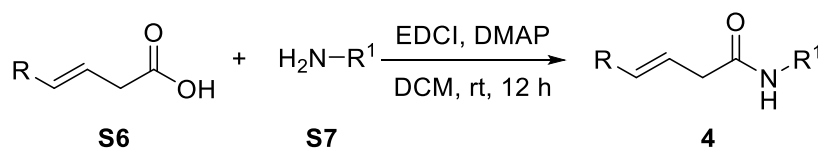

The reaction was performed following the literature procedures.<sup>[13]</sup>

At room temperature, the corresponding amine (10 mmol, 1.0 equiv.) was added to a 100 ml dry round-bottom flask equipped with a magnetic stirrer. After adding 50ml of anhydrous DCM, EDCI (10 mmol, 1.0 equiv.) and DMAP (1 mmol, 0.1 equiv.) were sequentially added. Next, but-3-enoic acid (11 mmol, 1.1 equiv.) was slowly added to the mixture, which was stirred at room temperature for 12 hours. After completion of the reaction, the reaction was quenched using saturated  $\text{NaHCO}_3$  solution. The organic phase was collected by extraction, while the aqueous phase was extracted with DCM (20 ml $\times$ 3). The extract was filtered, concentrated, and purified by silica gel column chromatography (eluent: petroleum ether : ethyl acetate = 4 : 1) to give but-3-enamides (**4**).

### *N*-(4-Methoxyphenyl)but-3-enamide (**4a**)

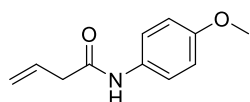

**4a** was prepared from but-3-enoic acid and 4-methoxyaniline in 1.72 g, 90% yield as a white solid. Purification of the residue by flash chromatography on silica gel (petroleum ether : ethyl acetate = 4 : 1). The  $^1\text{H}$  and  $^{13}\text{C}\{^1\text{H}\}$  data for this compound match the literature data<sup>[13]</sup>.

### *N*-Benzylbut-3-enamide (**4b**)

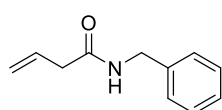

**4b** was prepared from but-3-enoic acid and phenylmethanamine in 1.61 g, 92% yield as a white solid. Purification of the residue by flash chromatography on silica gel (petroleum ether : ethyl acetate = 4 : 1). The  $^1\text{H}$  and  $^{13}\text{C}\{^1\text{H}\}$  data for this compound match the literature data<sup>[14]</sup>.

### (*E*)-*N*-(4-Methoxyphenyl)hex-3-enamide (**4c**)

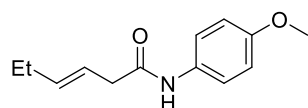

**4c** was prepared from (*E*)-hex-3-enoic acid and 4-methoxyaniline in 1.99 g, 91% yield as a white solid. Purification of the residue by flash chromatography on silica gel (petroleum ether : ethyl acetate = 4 : 1).

The  $^1\text{H}$  and  $^{13}\text{C}\{^1\text{H}\}$  data for this compound match the literature data.<sup>[15]</sup>

**(*E*)-*N*-(4-Methoxyphenyl)hept-3-enamide (4d)**

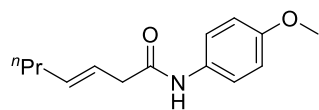

**4d** was prepared from (*E*)-hept-3-enoic acid and 4-methoxyaniline in 2.09 g, 90% yield as a white solid. Purification of the residue by flash chromatography on silica gel (petroleum ether : ethyl acetate = 4 : 1).

The  $^1\text{H}$  and  $^{13}\text{C}\{^1\text{H}\}$  data for this compound match the literature data.<sup>[16]</sup>

## Optimisation of conditions for yield and ee value of product **3aa**

Table S1. Screening of ligands for enantioselective synthesis of **3aa**.<sup>a,b,c,d</sup>

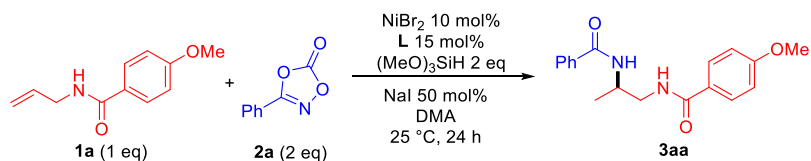

| Entry | L              | Yield of <b>3aa</b> /% | ee% of <b>3aa</b> /% |
|-------|----------------|------------------------|----------------------|
| 1     | <b>L1</b>      | 50                     | 15                   |
| 2     | <b>L2</b>      | 60                     | 40                   |
| 3     | <b>L3</b>      | 80                     | 67                   |
| 4     | <b>L4</b>      | <5                     | -                    |
| 5     | <b>L5</b>      | 83                     | 93                   |
| 6     | <b>L6</b>      | 78                     | 86                   |
| 7     | <b>L7</b>      | <5                     | -                    |
| 8     | <b>L8</b>      | 50                     | <5                   |
| 9     | <b>L9</b>      | <5                     | -                    |
| 10    | <b>L10</b>     | <5                     | -                    |
| 11    | <b>L11-L14</b> | 0                      | -                    |
| 12    | <b>L15</b>     | 25                     | <5                   |
| 13    | <b>L16</b>     | <5                     | -                    |
| 14    | <b>L17</b>     | <5                     | -                    |
| 15    | <b>L18</b>     | <5                     | -                    |
| 16    | <b>L19</b>     | <5                     | -                    |
| 17    | <b>L20</b>     | 23                     | <5                   |
| 18    | <b>L21</b>     | <5                     | -                    |
| 19    | <b>L22</b>     | <5                     | /                    |
| 20    | <b>L23</b>     | 62                     | 32                   |
| 21    | <b>L24</b>     | <5                     | -                    |
| 22    | <b>L25</b>     | <5                     | -                    |
| 23    | <b>L26</b>     | 60                     | 40                   |
| 24    | <b>L27</b>     | 55                     | 15                   |
| 25    | <b>L28</b>     | <5                     | -                    |

<sup>a</sup>Reactions conducted on a 0.1 mmol scale using 1.0 equiv. of **1a**, and 2.0 equiv. of **2a**,  $\text{NiBr}_2$  (10 mol%), Ligand (15 mol%), 2equiv. of  $(\text{MeO})_3\text{SiH}$  and 50 mol% of NaI in 1 mL of DMA at 25 °C for 48 h. <sup>b</sup>Isolated yield of **3aa** after flash chromatography on silica gel. <sup>c</sup>The ee (enantiomeric excess) of **3aa** was determined by chiral HPLC. <sup>d</sup>Racemic **3aa** was obtained when using diethyl [2,2'-bipyridine]-6,6'-dicarboxylate (**L1**) as ligand.

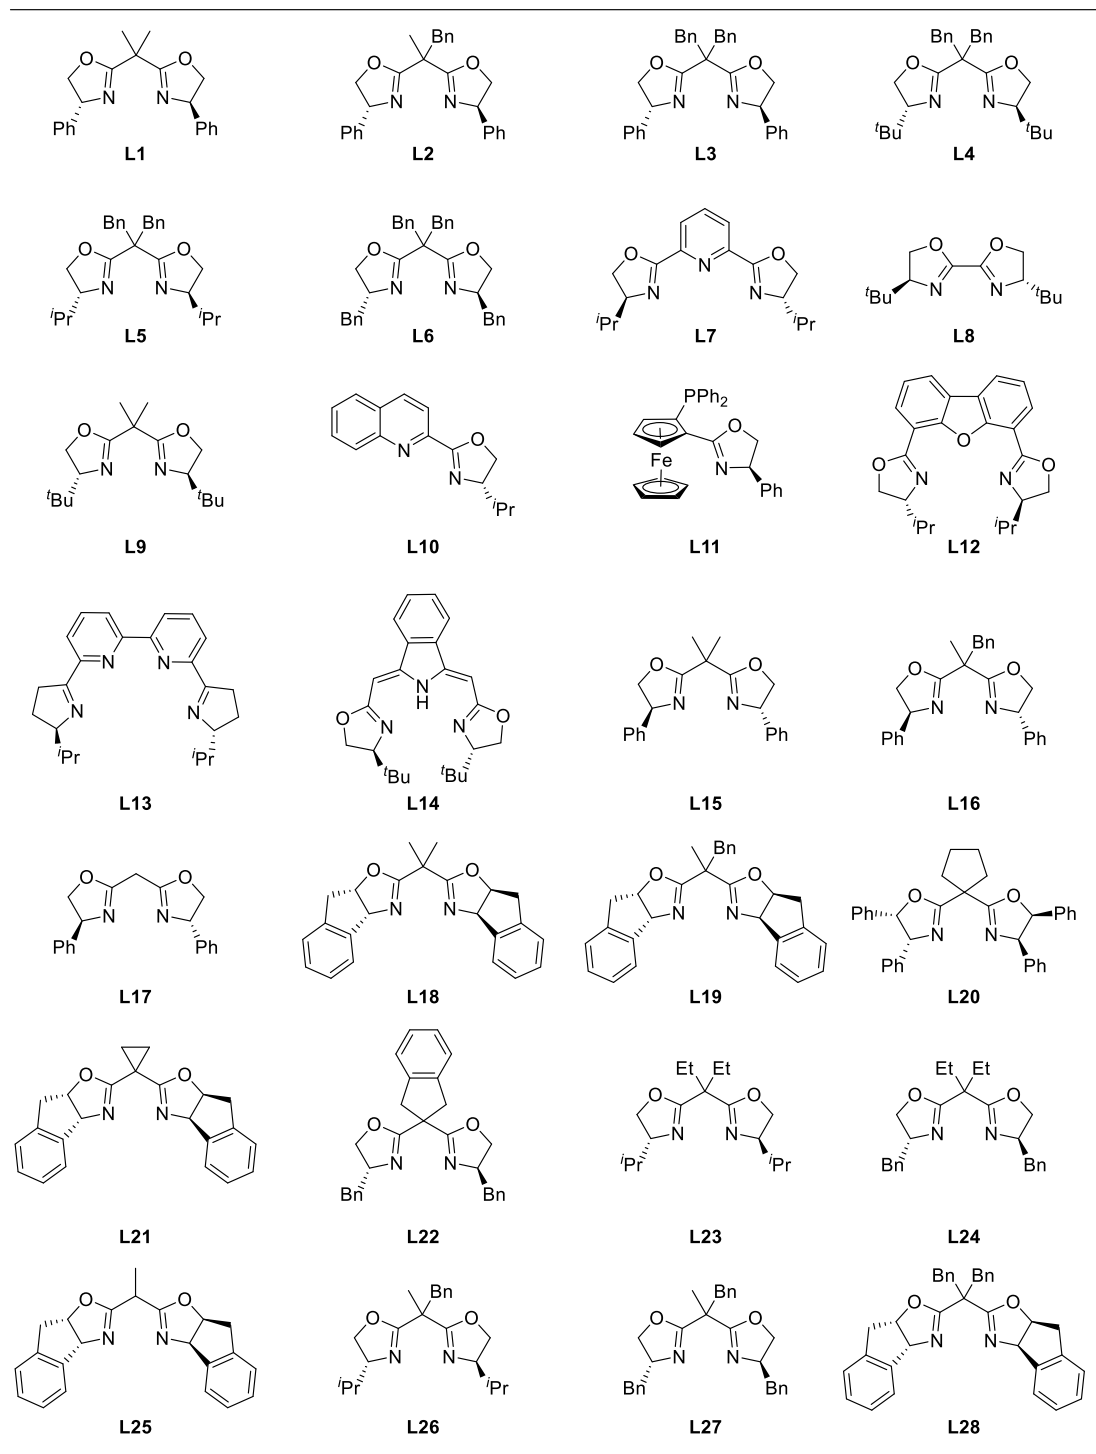

**Table S2. Screening of Ni catalyst for enantioselective synthesis of 3aa.<sup>a,b,c</sup>**

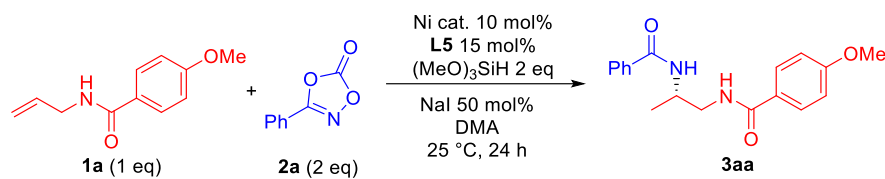

| Entry | Ni Cat.                              | Yield of <b>3</b> /% | ee% of <b>3</b> /% |
|-------|--------------------------------------|----------------------|--------------------|
| 1     | NiBr <sub>2</sub>                    | 83                   | 93                 |
| 2     | NiBr <sub>2</sub> ·DME               | 81                   | 75                 |
| 3     | NiCl <sub>2</sub>                    | 45                   | 75                 |
| 4     | NiCl <sub>2</sub> ·DME               | 60                   | 86                 |
| 5     | NiCl <sub>2</sub> ·6H <sub>2</sub> O | <5                   | -                  |
| 6     | NiI <sub>2</sub>                     | 66                   | 89                 |
| 7     | Ni(acac) <sub>2</sub>                | <5                   | -                  |
| 8     | Ni(COD) <sub>2</sub>                 | 0                    | -                  |

<sup>a</sup>Reactions conducted on a 0.1 mmol scale using 1.0 equiv. of **1a**, and 2.0 equiv. of **2a**, Ni cat. (10 mol%), **L5** (15 mol%), 2equiv. of  $(\text{MeO})_3\text{SiH}$  and 50 mol% of NaI in 1 mL of DMA at 25 °C for 48 h. <sup>b</sup>Isolated yield of **3aa** after flash chromatography on silica gel. <sup>c</sup>The ee (enantiomeric excess) of **3aa** was determined by chiral HPLC.

**Table S3. Screening of hydrogen source for enantioselective synthesis of 3aa.<sup>a,b,c</sup>**

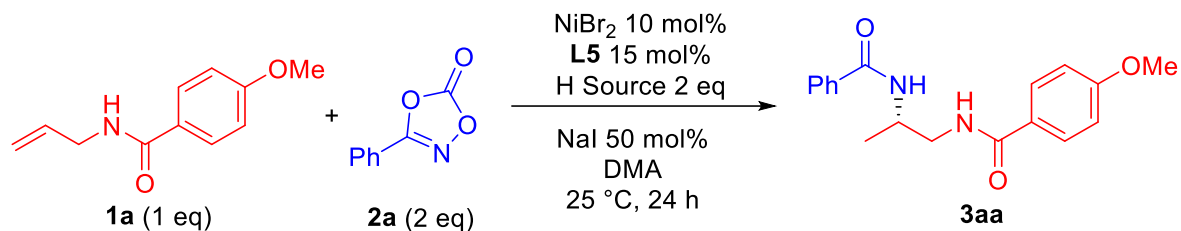

| Entry | H Source                         | Yield of <b>3</b> /% | ee% of <b>3</b> /% |
|-------|----------------------------------|----------------------|--------------------|
| 1     | $(\text{MeO})_3\text{SiH}$       | 83                   | 93                 |
| 2     | $(\text{MeO})_2\text{MeSiH}$     | 48                   | 89                 |
| 3     | $(\text{EtO})_3\text{SiH}$       | 77                   | 89                 |
| 4     | PMHS                             | 40                   | 88                 |
| 5     | Ph <sub>2</sub> SiH <sub>2</sub> | /                    | /                  |
| 6     | HBPIn                            | 60                   | 90                 |

<sup>a</sup>Reactions conducted on a 0.1 mmol scale using 1.0 equiv. of **1a**, and 2.0 equiv. of **2a**, NiBr<sub>2</sub> (10 mol%), **L5** (15 mol%), 2equiv. of hydrogen source and 50 mol% of NaI in 1 mL of DMA at 25 °C for 48 h. <sup>b</sup>Isolated yield of **3aa** after flash chromatography on silica gel. <sup>c</sup>The ee (enantiomeric excess) of **3aa** was determined by chiral HPLC.

**Table S4. Screening of solvent for enantioselective synthesis of 3aa.<sup>a,b,c</sup>**

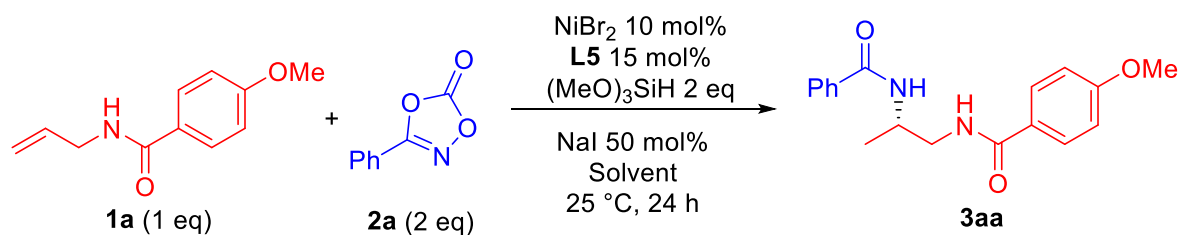

| Entry | Solvent  | Yield of <b>3</b> /% | ee% of <b>3</b> /% |
|-------|----------|----------------------|--------------------|
| 1     | THF      | 70                   | 90                 |
| 2     | Dioxane  | Trace                | /                  |
| 3     | 2-Me-THF | 56                   | 90                 |
| 4     | DMA      | 83                   | 93                 |
| 5     | MeCN     | 63                   | 89                 |
| 6     | DCE      | Trace                | /                  |
| 7     | MTBE     | 60                   | 87                 |
| 8     | CPME     | Trace                | /                  |
| 9     | DME      | Trace                | /                  |

<sup>a</sup>Reactions conducted on a 0.1 mmol scale using 1.0 equiv. of **1a**, and 2.0 equiv. of **2a**,  $\text{NiBr}_2$  (10 mol%), **L5** (15 mol%), 2equiv. of  $(\text{MeO})_3\text{SiH}$  and 50 mol% of NaI in 1 mL of solvent at 25 °C for 48 h.

<sup>b</sup>Isolated yield of **3aa** after flash chromatography on silica gel. <sup>c</sup>The *ee* (enantiomeric excess) of **3aa** was determined by chiral HPLC.

**Table S5. Screening of additive for enantioselective synthesis of 3aa.<sup>a,b,c</sup>**

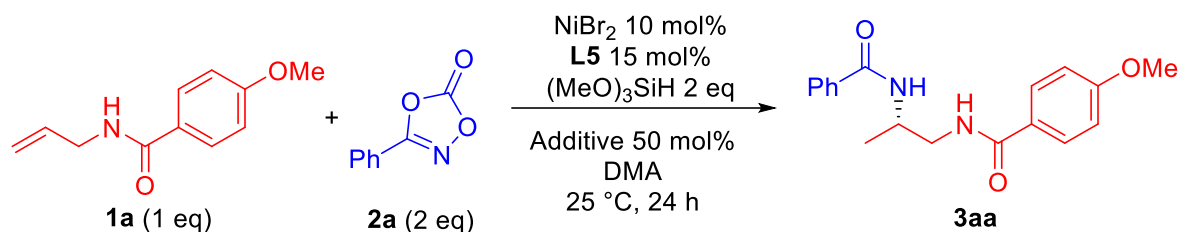

| Entry | Additive | Yield of <b>3</b> /% | ee% of <b>3</b> /% |
|-------|----------|----------------------|--------------------|
| 1     | NaI      | 83                   | 93                 |
| 2     | NaF      | 58                   | 87                 |
| 3     | NaCl     | 60                   | 88                 |
| 4     | NaBr     | 68                   | 86                 |
| 5     | LiI      | 56                   | 90                 |
| 6     | CsI      | 60                   | 89                 |
| 7     | /        | 50                   | 90                 |

<sup>a</sup>Reactions conducted on a 0.1 mmol scale using 1.0 equiv. of **1a**, and 2.0 equiv. of **2a**,  $\text{NiBr}_2$  (10 mol%), **L5** (15 mol%), 2equiv. of  $(\text{MeO})_3\text{SiH}$  and 50 mol% of additive in 1 mL of DMA at 25 °C for 48 h. <sup>b</sup>Isolated yield of **3aa** after flash chromatography on silica gel. <sup>c</sup>The *ee* (enantiomeric excess) of **3aa** was determined by chiral HPLC.

**Table S6. Screening of reaction time for enantioselective synthesis of **3aa**.**<sup>a,b,c</sup>

| Entry | T/ h | Yield of <b>3</b> /% | ee% of <b>3</b> /% |
|-------|------|----------------------|--------------------|
| 1     | 24   | 53                   | 93                 |
| 2     | 36   | 68                   | 91                 |
| 3     | 48   | 83                   | 91                 |
| 4     | 60   | 79                   | 90                 |

<sup>a</sup>Reactions conducted on a 0.1 mmol scale using 1.0 equiv. of **1a**, and 2.0 equiv. of **2a**, NiBr<sub>2</sub> (10 mol%), **L5** (15 mol%), 2equiv. of (MeO)<sub>3</sub>SiH and 50 mol% of NaI in 1 mL of DMA at 25 °C for different reaction time. <sup>b</sup>Isolated yield of **3aa** after flash chromatography on silica gel. <sup>c</sup>The *ee* (enantiomeric excess) of **3aa** was determined by chiral HPLC.

## General procedure and characterization of NiH-catalyzed asymmetric hydroamidation of unactivated olefins

In a glove box under a nitrogen atmosphere, NiBr<sub>2</sub> (4.4 mg, 0.02 mmol, 10 mol%) and **L5** (12.6 mg, 0.03 mmol, 15 mol%) were added to a dry 8 ml reaction vial containing a magnetic stir bar. Then, 2 ml of anhydrous DMA was added to the mixture, which was stirred at room temperature for 10 minutes. Subsequently, (MeO)<sub>3</sub>SiH (50 mg, 0.4 mmol, 2.0 equiv.) and NaI (15 mg, 0.1 mmol, 50 mol%) were sequentially added to the mixture and stirred. *N*-allyl-amides **1** or but-3-enamides **3** were then added to the mixture and finally 1,4,2-dioxazol-5-ones **2** were added. The reaction vial was sealed and taken out of the glove box, and the mixture was stirred at room temperature for 48 hours or at 40 °C for 72 hours. After the completion of the reaction, 2 ml of EtOAc was added to the reaction vial for dilution. Extraction was performed using 50 ml of EA and 20 ml of saturated NaCl solution. The organic phase was further extracted using 2×30 ml of saturated NaCl solution. The organic phase was then dried using anhydrous Na<sub>2</sub>SO<sub>4</sub> and the solvent was removed under vacuum. The crude material was loaded onto a silica gel column and purified by flash chromatography to obtain 1,2-diamines **3** or β-amino amides **5**.

### (*S*)-*N*-(2-Benzamidopropyl)-4-methoxybenzamide (**3aa**)

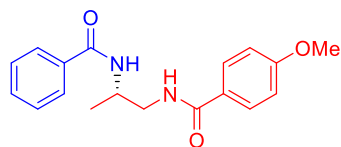

The reaction was performed with *N*-allyl-4-methoxybenzamide **1a** (38.2 mg, 0.2 mmol) and 3-phenyl-1,4,2-dioxazol-5-one **2a** (65.2 mg, 0.4 mmol). The crude product was separated by flash chromatography on silica gel (petroleum ether : ethyl acetate = 1 : 1.5) to give the product **3aa** (51.8 mg, 83% yield, 93% *ee*) as a white solid. **Mp**: 210 – 212 °C. **R<sub>f</sub>** = 0.28 (petroleum ether : ethyl acetate = 1 : 1.5). **<sup>1</sup>H NMR** (400 MHz, DMSO-*d*<sub>6</sub>) δ 8.45 (t, *J* = 6.4 Hz, 1H), 8.29 (d, *J* = 8.0 Hz, 1H), 7.90 – 7.73 (m, 4H), 7.54 – 7.48 (m, 1H), 7.45 (dd, *J* = 8.0, 6.4 Hz, 2H), 7.04 – 6.92 (m, 2H), 4.29 – 4.15 (m, 1H), 3.79 (s, 3H), 3.40 (t, *J* = 6.4 Hz, 2H), 1.16 (d, *J* = 6.8 Hz, 3H) ppm. **<sup>13</sup>C NMR** (100 MHz, DMSO-*d*<sub>6</sub>) δ 166.3, 166.0, 161.5, 134.8, 131.0, 129.0, 128.2, 127.2, 126.8, 113.5, 55.3, 45.6, 44.2, 18.0 ppm. **HRMS** calc'd for C<sub>18</sub>H<sub>21</sub>N<sub>2</sub>O<sub>3</sub><sup>+</sup> 313.1547, found 313.1545 [M+H]<sup>+</sup>; **HPLC analysis**: Daicel CHIRALPAK AD-3 *n*-hexane/*i*-PrOH = 90/10, flow rate = 1.0 mL/min, λ = 254 nm, retention time: *t*<sub>major</sub> = 20.99 min, *t*<sub>minor</sub> = 23.22 min; [ $\alpha$ ]<sub>D</sub><sup>20</sup> = 45.70 (*c* 1.0, MeOH).

**(S)-N-(1-(4-Methoxybenzamido)propan-2-yl)-2-methylbenzamide (3ab)**

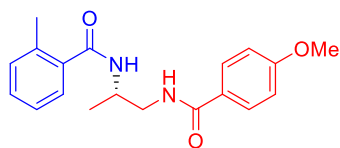

The reaction was performed with *N*-allyl-4-methoxybenzamide **1a** (38.2 mg, 0.2 mmol) and 3-(*o*-tolyl)-1,4,2-dioxazol-5-one **2b** (70.8 mg, 0.4 mmol). The crude product was separated by flash chromatography on silica gel (petroleum ether : ethyl acetate = 1 : 1.5) to give the product **3ab** (53.5 mg, 82% yield, 97% *ee*) as a white solid. **Mp**: 173 – 175 °C. **R<sub>f</sub>** = 0.27 (petroleum ether : ethyl acetate = 1 : 1.5). **<sup>1</sup>H NMR** (400 MHz, DMSO-*d*<sub>6</sub>) δ 8.36 (t, *J* = 6.0 Hz, 1H), 8.10 (d, *J* = 8.0 Hz, 1H), 7.85 – 7.79 (m, 2H), 7.36 – 7.29 (m, 2H), 7.21 (d, *J* = 7.2 Hz, 2H), 7.02 – 6.97 (m, 2H), 4.28 – 4.14 (m, 1H), 3.80 (s, 3H), 3.46 – 3.34 (m, 2H), 2.28 (s, 3H), 1.14 (d, *J* = 6.8 Hz, 3H) ppm. **<sup>13</sup>C NMR** (100 MHz, DMSO-*d*<sub>6</sub>) δ 168.7, 166.0, 161.5, 137.5, 135.0, 130.3, 129.1, 129.0, 127.0, 126.8, 125.4, 113.5, 55.3, 44.9, 44.3, 19.2, 18.0 ppm. **HRMS** calc'd for C<sub>19</sub>H<sub>23</sub>N<sub>2</sub>O<sub>3</sub><sup>+</sup> 327.1703, found 327.1702 [M+H]<sup>+</sup>; **HPLC analysis**: Daicel CHIRALPAK AD-3 *n*-hexane/*i*-PrOH = 80/20, flow rate = 1.0 mL/min, λ = 254 nm, retention time: *t*<sub>major</sub> = 6.21 min, *t*<sub>minor</sub> = 8.45 min; [α]<sub>D</sub><sup>20</sup> = 24.73 (*c* 1.0, MeOH).

**(S)-2-Methoxy-N-(1-(4-methoxybenzamido)propan-2-yl)benzamide (3ac)**

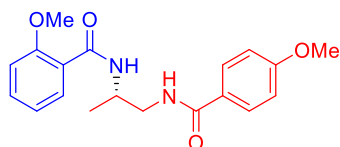

The reaction was performed with *N*-allyl-4-methoxybenzamide **1a** (38.2 mg, 0.2 mmol) and 3-(2-methoxyphenyl)-1,4,2-dioxazol-5-one **2c** (77.2 mg, 0.4 mmol). The crude product was separated by flash chromatography on silica gel (petroleum ether : ethyl acetate = 1 : 1.5) to give the product **3ac** (56.7 mg, 83% yield, 90% *ee*) as a white solid. **Mp**: 160 – 162 °C. **R<sub>f</sub>** = 0.20 (petroleum ether : ethyl acetate = 1 : 1.5). **<sup>1</sup>H NMR** (400 MHz, DMSO-*d*<sub>6</sub>) δ 8.46 (t, *J* = 6.0 Hz, 1H), 8.18 (d, *J* = 7.6 Hz, 1H), 7.89 – 7.79 (m, 2H), 7.72 (dd, *J* = 7.6, 2.0 Hz, 1H), 7.49 – 7.35 (m, 1H), 7.09 (dd, *J* = 8.4, 1.0 Hz, 1H), 7.05 – 6.94 (m, 3H), 4.25– 4.12 (m, 1H), 3.83 (s, 3H), 3.79 (s, 3H), 3.48 – 3.37 (m, 2H), 1.16 (d, *J* = 6.8 Hz, 3H) ppm. **<sup>13</sup>C NMR** (100 MHz, DMSO-*d*<sub>6</sub>) δ 166.3, 164.7, 161.6, 157.0, 132.1, 130.3, 129.0, 126.6, 123.2, 120.4, 113.5, 111.9, 55.8, 55.4, 45.7, 43.9, 18.2 ppm. **HRMS** calc'd for C<sub>19</sub>H<sub>23</sub>N<sub>2</sub>O<sub>4</sub><sup>+</sup> 343.1652, found 343.1650 [M+H]<sup>+</sup>; **HPLC analysis**: Daicel CHIRALPAK AD-3 *n*-hexane/*i*-PrOH = 80/20, flow rate = 1.0 mL/min, λ = 254 nm, retention time: *t*<sub>major</sub> = 13.40 min, *t*<sub>minor</sub> = 15.72 min; [α]<sub>D</sub><sup>20</sup> = 40.37 (*c* 1.0, MeOH).

**(S)-N-(1-(4-Methoxybenzamido)propan-2-yl)-3-methylbenzamide (3ad)**

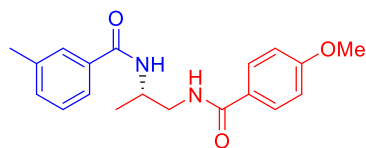

The reaction was performed with *N*-allyl-4-methoxybenzamide **1a** (38.2 mg, 0.2 mmol) and 3-(*m*-tolyl)-1,4,2-dioxazol-5-one **2d** (70.8 mg, 0.4 mmol). The crude product was separated by flash chromatography on silica gel (petroleum ether : ethyl acetate = 1 : 1.5) to give the product **3ad** (56.7 mg, 83% yield, 92% *ee*) as a white solid. **Mp**: 197 – 199 °C. **R<sub>f</sub>** = 0.29 (petroleum ether : ethyl acetate = 1 : 1.5). **<sup>1</sup>H NMR** (400 MHz, DMSO-*d*<sub>6</sub>) δ 8.44 (t, *J* = 6.0 Hz, 1H), 8.24 (d, *J* = 8.0 Hz, 1H), 7.84 – 7.77 (m, 2H), 7.65 (d, *J* = 2.0 Hz, 1H), 7.61 (dt, *J* = 6.4, 2.0 Hz, 1H), 7.37 – 7.29 (m, 2H), 7.02 – 6.95 (m, 2H), 4.28 – 4.15 (m, 1H), 3.79 (s, 3H), 3.44 – 3.38 (m, 2H), 2.35 (s, 3H), 1.16 (d, *J* = 6.8 Hz, 3H) ppm. **<sup>13</sup>C NMR** (100 MHz, DMSO-*d*<sub>6</sub>) δ 166.3, 166.1, 161.5, 137.4, 134.8, 131.6, 129.0, 128.1, 127.8, 126.8, 124.4, 113.5, 55.3, 45.5, 44.2, 21.0, 18.0 ppm. **HRMS** calc'd for C<sub>19</sub>H<sub>23</sub>N<sub>2</sub>O<sub>3</sub><sup>+</sup> 327.1703, found 327.1701 [M+H]<sup>+</sup>; **HPLC analysis**: Daicel CHIRALPAK AD-3 *n*-hexane/*i*-PrOH = 80/20, flow rate = 1.0 mL/min, λ = 254 nm, retention time: *t*<sub>major</sub> = 7.05 min, *t*<sub>minor</sub> = 8.55 min; [α]<sub>D</sub><sup>20</sup> = 41.40 (*c* 1.0, MeOH).

**(S)-3-Methoxy-N-(1-(4-methoxybenzamido)propan-2-yl)benzamide (3ae)**

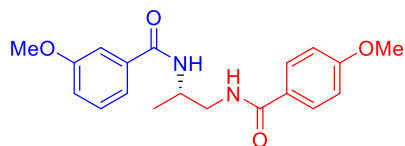

The reaction was performed with *N*-allyl-4-methoxybenzamide **1a** (38.2 mg, 0.2 mmol) and 3-(3-methoxyphenyl)-1,4,2-dioxazol-5-one **2e** (77.2 mg, 0.4 mmol). The crude product was separated by flash chromatography on silica gel (petroleum ether : ethyl acetate = 1 : 1.5) to give the product **3ae** (58.1 mg, 85% yield, 95% *ee*) as a white solid. **Mp**: 182 – 184 °C. **R<sub>f</sub>** = 0.24 (petroleum ether : ethyl acetate = 1 : 1.5). **<sup>1</sup>H NMR** (400 MHz, DMSO-*d*<sub>6</sub>) δ 8.46 (t, *J* = 6.0 Hz, 1H), 8.29 (d, *J* = 8.0 Hz, 1H), 7.95 – 7.73 (m, 2H), 7.53 – 7.28 (m, 3H), 7.12 – 7.04 (m, 1H), 7.02 – 6.87 (m, 2H), 4.32 – 4.15 (m, 1H), 3.80 (s, 6H), 3.49 – 3.37 (m, 2H), 1.17 (d, *J* = 6.8 Hz, 3H) ppm. **<sup>13</sup>C NMR** (100 MHz, DMSO-*d*<sub>6</sub>) δ 166.4, 165.7, 161.5, 159.1, 136.3, 129.3, 129.0, 126.8, 119.5, 116.8, 113.5, 112.5, 55.3, 55.3, 45.7, 44.2, 18.0 ppm. **HRMS** calc'd for C<sub>19</sub>H<sub>23</sub>N<sub>2</sub>O<sub>4</sub><sup>+</sup> 343.1652, found 343.1649 [M+H]<sup>+</sup>; **HPLC analysis**: Daicel CHIRALPAK AD-3 *n*-hexane/*i*-PrOH = 80/20, flow rate = 1.0 mL/min, λ = 254 nm, retention time: *t*<sub>major</sub> = 8.97 min, *t*<sub>minor</sub> = 11.34 min; [α]<sub>D</sub><sup>20</sup> = 26.63 (*c* 1.0, MeOH).

**(S)-4-(tert-Butyl)-N-(1-(4-methoxybenzamido)propan-2-yl)benzamide (3af)**

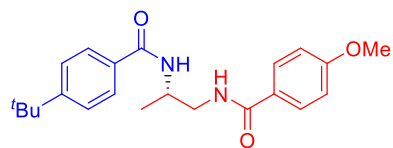

The reaction was performed with *N*-allyl-4-methoxybenzamide **1a** (38.2 mg, 0.2 mmol) and 3-(4-(tert-butyl)phenyl)-1,4,2-dioxazol-5-one **2f** (87.6 mg, 0.4 mmol). The crude product was separated by flash chromatography on silica gel (petroleum ether : ethyl acetate = 1 : 1.5) to give the product **3af** (58.1 mg, 79% yield, 94% *ee*) as a white solid. **Mp**: 210 – 212 °C. **R<sub>f</sub>** = 0.28 (petroleum ether : ethyl acetate = 1 : 1.5). **<sup>1</sup>H NMR** (400 MHz, DMSO-*d*<sub>6</sub>) δ 8.44 (t, *J* = 6.0 Hz, 1H), 8.22 (d, *J* = 8.0 Hz, 1H), 7.89 – 7.79 (m, 2H), 7.76 (dd, *J* = 8.4, 1.2 Hz, 2H), 7.45 (dd, *J* = 8.4, 1.2 Hz, 2H), 7.06 – 6.90 (m, 2H), 4.21 (h, *J* = 6.8 Hz, 1H), 3.79 (s, 3H), 3.40 (q, *J* = 6.0 Hz, 2H), 1.28 (s, 9H), 1.16 (d, *J* = 6.8 Hz, 3H) ppm. **<sup>13</sup>C NMR** (100 MHz, DMSO-*d*<sub>6</sub>) δ 166.3, 165.9, 161.5, 153.8, 132.1, 129.0, 127.1, 126.8, 125.0, 113.5, 55.3, 45.5, 44.3, 34.6, 31.0, 18.0 ppm. **HRMS** calc'd for C<sub>22</sub>H<sub>29</sub>N<sub>2</sub>O<sub>3</sub><sup>+</sup> 369.2173, found 369.2172 [M+H]<sup>+</sup>; **HPLC analysis**: Daicel CHIRALPAK AD-3 *n*-hexane/*i*-PrOH = 80/20, flow rate = 1.0 mL/min, λ = 254 nm, retention time: *t*<sub>major</sub> = 6.52 min, *t*<sub>minor</sub> = 9.31 min; [α]<sub>D</sub><sup>20</sup> = 22.44 (*c* 1.0, MeOH).

**(S)-N,N'-(Propane-1,2-diyl)bis(4-methoxybenzamide) (3ag)**

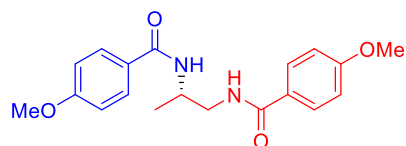

The reaction was performed with *N*-allyl-4-methoxybenzamide **1a** (38.2 mg, 0.2 mmol) and 3-(4-methoxyphenyl)-1,4,2-dioxazol-5-one **2g** (77.2 mg, 0.4 mmol). The crude product was separated by flash chromatography on silica gel (petroleum ether : ethyl acetate = 1 : 1.5) to give the product **3ag** (56.7 mg, 83% yield, 96% *ee*) as a white solid. **Mp**: 206 – 208 °C. **R<sub>f</sub>** = 0.19 (petroleum ether : ethyl acetate = 1 : 1.5). **<sup>1</sup>H NMR** (400 MHz, DMSO-*d*<sub>6</sub>) δ 8.44 (t, *J* = 6.0 Hz, 1H), 8.15 (d, *J* = 8.0 Hz, 1H), 7.88 – 7.75 (m, 4H), 7.05 – 6.91 (m, 4H), 4.25 – 4.16 (m, 1H), 3.80 (s, 3H), 3.79 (s, 3H), 3.39 (td, *J* = 6.4, 2.4 Hz, 2H), 1.15 (d, *J* = 6.8 Hz, 3H) ppm. **<sup>13</sup>C NMR** (100 MHz, DMSO-*d*<sub>6</sub>) δ 166.3, 165.4, 161.5, 161.5, 129.0, 127.0, 126.8, 113.5, 113.4, 55.3, 45.5, 44.3, 18.1 ppm. **HRMS** calc'd for C<sub>19</sub>H<sub>23</sub>N<sub>2</sub>O<sub>4</sub><sup>+</sup> 343.1652, found 343.1654 [M+H]<sup>+</sup>; **HPLC analysis**: Daicel CHIRALPAK AD-3 *n*-hexane/*i*-PrOH = 80/20, flow rate = 1.0 mL/min, λ = 254 nm, retention time: *t*<sub>major</sub> = 11.22 min, *t*<sub>minor</sub> = 14.47 min; [α]<sub>D</sub><sup>20</sup> = 9.84 (*c* 1.0, MeOH).

**(S)-4-Fluoro-N-(1-(4-methoxybenzamido)propan-2-yl)benzamide (3ah)**

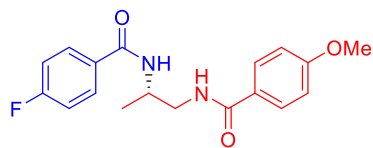

The reaction was performed with *N*-allyl-4-methoxybenzamide **1a** (38.2 mg, 0.2 mmol) and 3-(4-fluorophenyl)-1,4,2-dioxazol-5-one **2h** (72.4 mg, 0.4 mmol). The crude product was separated by flash chromatography on silica gel (petroleum ether : ethyl acetate = 1 : 1.5) to give the product **3ah** (46.2 mg, 70% yield, 97% *ee*) as a white solid. **Mp**: 227 – 229 °C. **R<sub>f</sub>** = 0.26 (petroleum ether : ethyl acetate = 1 : 1.5). **<sup>1</sup>H NMR** (400 MHz, DMSO-*d*<sub>6</sub>) δ 8.44 (t, *J* = 6.0 Hz, 1H), 8.31 (d, *J* = 8.0 Hz, 1H), 7.97 – 7.86 (m, 2H), 7.85 – 7.66 (m, 2H), 7.41 – 7.19 (m, 2H), 7.12 – 6.78 (m, 2H), 4.31 – 4.12 (m, 1H), 3.79 (s, 3H), 3.39 (dt, *J* = 6.4, 4.0 Hz, 2H), 1.16 (d, *J* = 6.8 Hz, 3H) ppm. **<sup>13</sup>C NMR** (100 MHz, DMSO-*d*<sub>6</sub>) δ 166.8, 165.4, 165.2 (d, *J<sub>I</sub>* = 246.4 Hz), 162.0, 131.7 (d, *J<sub>4</sub>* = 2.3 Hz), 130.3 (d, *J<sub>3</sub>* = 9.1 Hz), 129.5, 127.3, 115.5 (d, *J<sub>2</sub>* = 21.9 Hz), 113.9, 55.8, 46.1, 44.6, 18.4 ppm. **<sup>19</sup>F NMR** (376 MHz, DMSO-*d*<sub>6</sub>) δ -109.78 ppm. **HRMS** calc'd for C<sub>18</sub>H<sub>20</sub>FN<sub>2</sub>O<sub>3</sub><sup>+</sup> 331.1452, found 331.1450 [M+H]<sup>+</sup>; **HPLC analysis**: Daicel CHIRALPAK AD-3 *n*-hexane/*i*-PrOH = 80/20, flow rate = 1.0 mL/min, λ = 254 nm, retention time: *t*<sub>major</sub> = 9.30 min, *t*<sub>minor</sub> = 11.74 min; [α]<sub>D</sub><sup>20</sup> = 69.56 (*c* 1.0, MeOH).

**(S)-4-Chloro-N-(1-(4-methoxybenzamido)propan-2-yl)benzamide (3ai)**

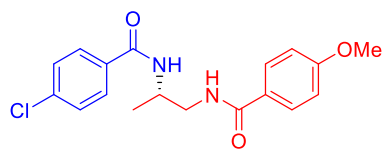

The reaction was performed with *N*-allyl-4-methoxybenzamide **1a** (38.2 mg, 0.2 mmol) and 3-(4-chlorophenyl)-1,4,2-dioxazol-5-one **2i** (78.8 mg, 0.4 mmol). The crude product was separated by flash chromatography on silica gel (petroleum ether : ethyl acetate = 1 : 1.5) to give the product **3ai** (49.8 mg, 72% yield, 94% *ee*) as a white solid. **Mp**: 235 – 237 °C. **R<sub>f</sub>** = 0.27 (petroleum ether : ethyl acetate = 1 : 1.5). **<sup>1</sup>H NMR** (400 MHz, DMSO-*d*<sub>6</sub>) δ 8.44 (t, *J* = 6.0 Hz, 1H), 8.37 (d, *J* = 8.0 Hz, 1H), 7.88 – 7.83 (m, 2H), 7.83 – 7.76 (m, 2H), 7.58 – 7.50 (m, 2H), 7.02 – 6.93 (m, 2H), 4.28 – 4.13 (m, 1H), 3.79 (s, 3H), 3.39 (dt, *J* = 6.4, 3.6 Hz, 2H), 1.15 (d, *J* = 6.8 Hz, 3H) ppm. **<sup>13</sup>C NMR** (100 MHz, DMSO-*d*<sub>6</sub>) δ 166.8, 165.3, 162.0, 136.3, 134.0, 129.7, 129.5, 128.8, 127.2, 113.9, 55.8, 46.1, 44.6, 18.4 ppm. **HRMS** calc'd for C<sub>18</sub>H<sub>20</sub>ClN<sub>2</sub>O<sub>3</sub><sup>+</sup> 347.1157, found 347.1161 [M+H]<sup>+</sup>; **HPLC analysis**: Daicel CHIRALPAK AD-3 *n*-hexane/*i*-PrOH = 85/15, flow rate = 1.0 mL/min, λ = 254 nm, retention time: *t*<sub>major</sub> = 12.70 min, *t*<sub>minor</sub> = 11.11 min; [α]<sub>D</sub><sup>20</sup> = 56.85 (*c* 1.0, MeOH).

**(S)-4-Bromo-N-(1-(4-methoxybenzamido)propan-2-yl)benzamide (3aj)**

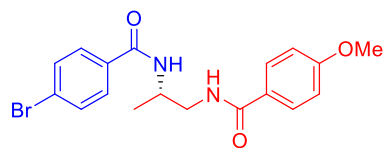

The reaction was performed with *N*-allyl-4-methoxybenzamide

**1a** (38.2 mg, 0.2 mmol) and 3-(4-bromophenyl)-1,4,2-dioxazol-5-one **2j** (96.4 mg, 0.4 mmol).

The crude product was separated by flash chromatography on silica gel (petroleum ether : ethyl acetate = 1 : 1.5) to give the product **3aj** (58.5 mg, 75% yield, 95% *ee*) as a white solid. **Mp**: 240 – 242 °C. **R<sub>f</sub>** = 0.28 (petroleum ether : ethyl acetate = 1 : 1.5). **<sup>1</sup>H NMR** (400 MHz, DMSO-*d*<sub>6</sub>) δ 8.44 (t, *J* = 6.0 Hz, 1H), 8.37 (d, *J* = 8.0 Hz, 1H), 7.90 – 7.83 (m, 2H), 7.83 – 7.72 (m, 2H), 7.59 – 7.49 (m, 2H), 7.04 – 6.92 (m, 2H), 4.30 – 4.12 (m, 1H), 3.79 (s, 3H), 3.39 (td, *J* = 6.4, 1.6 Hz, 2H), 1.15 (d, *J* = 6.8 Hz, 3H) ppm. **<sup>13</sup>C NMR** (100 MHz, DMSO-*d*<sub>6</sub>) δ 166.3, 164.9, 161.5, 135.9, 133.6, 129.2, 129.0, 128.3, 126.8, 113.5, 55.3, 45.7, 44.1, 18.0 ppm. **HRMS** calc'd for C<sub>18</sub>H<sub>20</sub>BrN<sub>2</sub>O<sub>3</sub><sup>+</sup> 391.0652, found 391.0650 [M+H]<sup>+</sup>; **HPLC analysis**: Daicel CHIRALPAK AD-3 *n*-hexane/*i*-PrOH = 80/20, flow rate = 1.0 mL/min, λ = 254 nm, retention time: *t*<sub>major</sub> = 11.50 min, *t*<sub>minor</sub> = 10.36 min; [α]<sub>D</sub><sup>20</sup> = 30.55 (*c* 1.0, MeOH).

**(S)-4-Methoxy-N-(2-(4-(trifluoromethoxy)benzamido)propyl)benzamide (3ak)**

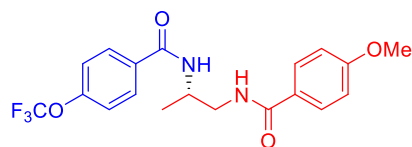

The reaction was performed with

*N*-allyl-4-methoxybenzamide **1a** (38.2 mg, 0.2 mmol) and 3-(4-(trifluoromethoxy)phenyl)-1,4,2-dioxazol-5-one **2k** (98.8

mg, 0.4 mmol). The crude product was separated by flash chromatography on silica gel (petroleum ether : ethyl acetate = 1 : 1.5) to give the product **3ak** (61.8 mg, 78% yield, 99% *ee*) as a white solid. **Mp**: 203 – 205 °C. **R<sub>f</sub>** = 0.23 (petroleum ether : ethyl acetate = 1 : 1.5). **<sup>1</sup>H NMR** (400 MHz, DMSO-*d*<sub>6</sub>) δ 8.46 – 8.37 (m, 2H), 7.98 – 7.93 (m, 2H), 7.83 – 7.78 (m, 2H), 7.49 – 7.42 (m, 2H), 7.00 – 6.94 (m, 2H), 4.29 – 4.16 (m, 1H), 3.79 (s, 3H), 3.45 – 3.36 (m, 2H), 1.16 (d, *J* = 6.8 Hz, 3H) ppm. **<sup>13</sup>C NMR** (100 MHz, DMSO-*d*<sub>6</sub>) δ 166.3, 164.7, 161.5, 150.2, 134.0, 129.6, 129.0, 126.8, 120.6, 119.9 (q, *J*<sub>F</sub> = 255.1 Hz), 113.5, 55.3, 45.7, 44.1, 17.9 ppm. **<sup>19</sup>F NMR** (376 MHz, DMSO-*d*<sub>6</sub>) δ -56.70 ppm. **HRMS** calc'd for C<sub>19</sub>H<sub>20</sub>F<sub>3</sub>N<sub>2</sub>O<sub>4</sub><sup>+</sup> 397.1370, found 397.1372 [M+H]<sup>+</sup>; **HPLC analysis**: Daicel CHIRALPAK AD-3 *n*-hexane/*i*-PrOH = 90/10, flow rate = 1.0 mL/min, λ = 254 nm, retention time: *t*<sub>major</sub> = 15.93 min, *t*<sub>minor</sub> = 13.69 min; [α]<sub>D</sub><sup>20</sup> = 50.56 (*c* 1.0, MeOH).

**(S)-N-(1-(4-Methoxybenzamido)propan-2-yl)thiophene-2-carboxamide (3al)**

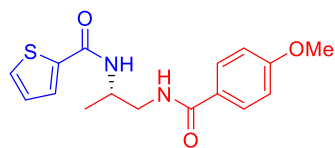

The reaction was performed with *N*-allyl-4-methoxybenzamide **1a** (38.2 mg, 0.2 mmol) and 3-(thiophen-2-yl)-1,4,2-dioxazol-5-one **2l** (67.6 mg, 0.4 mmol). The crude product was separated by flash chromatography on silica gel (petroleum ether : ethyl acetate = 1 : 1.5) to give the product **3al** (45.2 mg, 71% yield, 93% *ee*) as a white solid. **Mp**: 190 – 192 °C. **R<sub>f</sub>** = 0.25 (petroleum ether : ethyl acetate = 1 : 1.5). **<sup>1</sup>H NMR** (400 MHz, DMSO-*d*<sub>6</sub>) δ 8.45 (t, *J* = 6.0 Hz, 1H), 8.32 (d, *J* = 8.0 Hz, 1H), 7.84 – 7.79 (m, 2H), 7.74 – 7.68 (m, 2H), 7.14 (dd, *J* = 5.2, 3.6 Hz, 1H), 7.03 – 6.93 (m, 2H), 4.24 – 4.11 (m, 1H), 3.79 (s, 3H), 3.41 (td, *J* = 12.4, 11.6, 6.0 Hz, 2H), 1.15 (d, *J* = 6.8 Hz, 3H) ppm. **<sup>13</sup>C NMR** (100 MHz, DMSO-*d*<sub>6</sub>) δ 166.3, 161.5, 160.7, 140.3, 130.6, 129.1, 128.0, 127.8, 126.7, 113.5, 55.3, 45.5, 44.1, 18.0 ppm. **HRMS** calc'd for C<sub>16</sub>H<sub>19</sub>N<sub>2</sub>O<sub>3</sub>S<sup>+</sup> 319.1111, found 319.1114 [M+H]<sup>+</sup>; **HPLC analysis**: Daicel CHIRALPAK AD-3 *n*-hexane/*i*-PrOH = 80/20, flow rate = 1.0 mL/min, λ = 254 nm, retention time: *t*<sub>major</sub> = 9.13 min, *t*<sub>minor</sub> = 11.36 min; [α]<sub>D</sub><sup>20</sup> = 54.54 (c 1.0, MeOH).

**N-((3S)-3-Benzamidobutan-2-yl)-4-methoxybenzamide (3ba)**

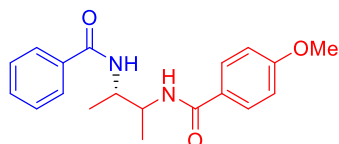

The reaction was performed with *N*-(but-3-en-2-yl)-4-methoxybenzamide **1b** (41.0 mg, 0.2 mmol) and 3-phenyl-1,4,2-dioxazol-5-one **2a** (65.2 mg, 0.4 mmol). The crude product was separated by flash chromatography on silica gel (petroleum ether : ethyl acetate = 1 : 1.5) to give the product **3ba** in two diastereoisomers (*dr* = 1.2:1) as a white solid.

**Major diastereoisomer**: (22.1 mg, 34% yield, 90% *ee*), **Mp**: 181 – 183 °C. **R<sub>f</sub>** = 0.28 (petroleum ether : ethyl acetate = 1 : 1.5). **<sup>1</sup>H NMR** (600 MHz, DMSO-*d*<sub>6</sub>) δ 8.23 (d, *J* = 7.8 Hz, 1H), 8.09 (d, *J* = 7.8 Hz, 1H), 7.84 – 7.73 (m, 4H), 7.50 (t, *J* = 7.2 Hz, 1H), 7.44 (dd, *J* = 8.4, 6.6 Hz, 2H), 7.03 – 6.93 (m, 2H), 4.18 (m, 2H), 3.79 (s, 3H), 1.17 (d, *J* = 5.8 Hz, 6H) ppm. **<sup>13</sup>C NMR** (150 MHz, DMSO-*d*<sub>6</sub>) δ 166.4, 165.8, 161.4, 135.0, 131.0, 129.1, 128.2, 127.2, 127.1, 55.3, 49.4, 49.2, 17.8, 17.8 ppm. **HRMS** calc'd for C<sub>19</sub>H<sub>23</sub>N<sub>2</sub>O<sub>3</sub><sup>+</sup> 327.1703, found 327.1706 [M+H]<sup>+</sup>; **HPLC analysis**: Daicel CHIRALPAK AD-3 *n*-hexane/*i*-PrOH = 90/10, flow rate = 1.0 mL/min, λ = 254 nm, retention time: *t*<sub>major</sub> = 12.53 min, *t*<sub>minor</sub> = 14.05 min; [α]<sub>D</sub><sup>20</sup> = 36.53 (c 1.0, MeOH).

**Minor diastereoisomer**: (18.4 mg, 28% yield, 82% *ee*), **Mp**: 178 – 180 °C. **R<sub>f</sub>** = 0.26 (petroleum ether :

ethyl acetate = 1 : 1.5). **<sup>1</sup>H NMR** (600 MHz, DMSO-*d*<sub>6</sub>) δ 8.39 (d, *J* = 7.2 Hz, 1H), 8.24 (d, *J* = 7.2 Hz, 1H), 7.85 (t, *J* = 7.2 Hz, 4H), 7.52 (t, *J* = 7.2 Hz, 1H), 7.46 (t, *J* = 7.2 Hz, 2H), 6.99 (d, *J* = 8.4 Hz, 2H), 4.20 (m, 2H), 3.81 (s, 3H), 1.14 (d, *J* = 5.3 Hz, 6H) ppm. **<sup>13</sup>C NMR** (150 MHz, DMSO-*d*<sub>6</sub>) δ 166.0, 165.5, 161.5, 134.8, 131.1, 129.1, 128.2, 127.3, 126.9, 113.4, 55.4, 49.2, 49.1, 17.5, 17.4 ppm. **HRMS** calc'd for C<sub>19</sub>H<sub>23</sub>N<sub>2</sub>O<sub>3</sub><sup>+</sup> 327.1703, found 327.1704 [M+H]<sup>+</sup>; **HPLC analysis**: Daicel CHIRALPAK AD-3 *n*-hexane/*i*-PrOH = 90/10, flow rate = 1.0 mL/min, λ = 254 nm, retention time: *t*<sub>major</sub> = 19.03 min, *t*<sub>minor</sub> = 20.07 min; [α]<sub>D</sub><sup>20</sup> = 16.87 (*c* 1.0, MeOH).

***N*-((2*S*,3*S*)-3-Benzamido-1-phenylbutan-2-yl)-4-methoxybenzamide (3ca)**

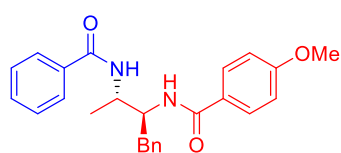

The reaction was performed with (*S*)-4-methoxy-*N*-(1-phenylbut-3-en-2-yl)benzamide **1c** (56.2 mg, 0.2 mmol) and 3-phenyl-1,4,2-dioxazol-5-one **2a** (65.2 mg, 0.4 mmol).

The crude product was separated by flash chromatography on silica gel (petroleum ether : ethyl acetate = 1 : 1.5) to give the product **3ca** (62.7 mg, 78% yield, 92% de) as a white solid. **Mp**: 201 – 203 °C. **R<sub>f</sub>** = 0.26 (petroleum ether : ethyl acetate = 1 : 1.5). **<sup>1</sup>H NMR** (400 MHz, DMSO-*d*<sub>6</sub>) δ 8.27 (d, *J* = 8.4 Hz, 1H), 8.14 (d, *J* = 8.8 Hz, 1H), 7.89 – 7.80 (m, 2H), 7.76 – 7.68 (m, 2H), 7.54 – 7.45 (m, 3H), 7.28 – 7.19 (m, 4H), 7.16 – 7.10 (m, 1H), 6.99 – 6.93 (m, 2H), 4.39 – 4.23 (m, 2H), 3.78 (s, 3H), 2.96 (dd, *J* = 13.6, 4.4 Hz, 1H), 2.85 (dd, *J* = 13.6, 9.6 Hz, 1H), 1.20 (d, *J* = 6.4 Hz, 3H) ppm. **<sup>13</sup>C NMR** (100 MHz, DMSO-*d*<sub>6</sub>) δ 166.4, 166.3, 161.5, 139.2, 135.1, 131.1, 129.1, 129.0, 128.3, 128.1, 127.3, 127.1, 126.0, 113.4, 55.3, 54.9, 48.5, 37.2, 18.1 ppm. **HRMS** calc'd for C<sub>25</sub>H<sub>27</sub>N<sub>2</sub>O<sub>3</sub><sup>+</sup> 403.2016, found 403.2011 [M+H]<sup>+</sup>; **HPLC analysis**: Daicel CHIRALPAK AD-3 *n*-hexane/*i*-PrOH = 80/20, flow rate = 1.0 mL/min, λ = 254 nm, retention time: *t*<sub>major</sub> = 5.14 min, *t*<sub>minor</sub> = 7.82 min; [α]<sub>D</sub><sup>20</sup> = 68.50 (*c* 1.0, MeOH).

***N*-((1*S*,2*S*)-2-Benzamido-1-cyclohexylpropyl)-4-methoxybenzamide (3da)**

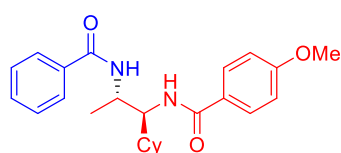

The reaction was performed with (*S*)-*N*-(1-cyclohexylallyl)-4-methoxybenzamide **1d** (54.6 mg, 0.2 mmol) and 3-phenyl-1,4,2-dioxazol-5-one **2a** (65.2 mg, 0.4 mmol).

The crude product was separated by flash chromatography on silica gel (petroleum ether : ethyl acetate = 1 : 1.5) to give the product **3da** (53.6 mg, 68% yield, 90% de) as a white solid. **Mp**: 206 – 208 °C. **R<sub>f</sub>** = 0.25 (petroleum ether : ethyl acetate = 1 : 1.5). **<sup>1</sup>H NMR** (400 MHz, DMSO-*d*<sub>6</sub>) δ 8.38 (t, *J* = 5.6 Hz,

1H), 7.99 (d,  $J = 8.8$  Hz, 1H), 7.91 – 7.84 (m, 2H), 7.84 – 7.77 (m, 2H), 7.54 – 7.47 (m, 1H), 7.47 – 7.39 (m, 2H), 7.02 – 6.93 (m, 2H), 3.87 (d,  $J = 3.1$  Hz, 1H), 3.81 (s, 3H), 3.47 – 3.36 (m, 1H), 3.20 – 3.04 (m, 1H), 1.95– 1.85 (m, 1H), 1.83 – 1.64 (m, 5H), 1.63 – 1.55 (m, 1H), 1.55 – 1.44 (m, 1H), 1.22 – 1.09 (m, 3H), 1.03 – 0.89 (m, 2H) ppm.  $^{13}\text{C}$  NMR (100 MHz, DMSO- $d_6$ )  $\delta$  166.5, 166.4, 161.9, 135.2, 131.5, 129.6, 128.7, 127.5, 113.8, 55.8, 52.2, 41.8, 37.4, 31.4, 29.9, 29.5, 26.5, 26.3, 26.2 ppm. HRMS calc'd for  $\text{C}_{24}\text{H}_{31}\text{N}_2\text{O}_3^+$  395.2329, found 395.2327  $[\text{M}+\text{H}]^+$ ; HPLC analysis: Daicel CHIRALPAK AD-3 *n*-hexane/*i*-PrOH = 80/20, flow rate = 1.0 mL/min,  $\lambda = 254$  nm, retention time:  $t_{\text{major}} = 8.53$  min,  $t_{\text{minor}} = 14.05$  min;  $[\alpha]_{\text{D}}^{20} = 42.98$  ( $c$  1.0, MeOH).

#### (*S*)-*N*-(2-Benzamidobutyl)-4-methoxybenzamide (3ea)

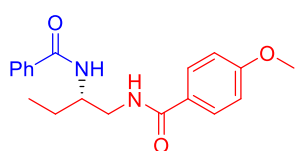

The reaction was performed with (*E*)-*N*-(but-2-en-1-yl)-4-methoxybenzamide **1e** (41.0 mg, 0.2 mmol) and 3-phenyl-1,4,2-dioxazol-5-one **2a** (65.2 mg, 0.4 mmol). The crude product was separated by flash chromatography on silica gel (petroleum ether : ethyl acetate = 1 : 1.5) to give the product **3ea** (26.7 mg, 41% yield, 93% *ee*) as a white solid. **Mp**: 219 – 221 °C. **R<sub>f</sub>** = 0.35 (petroleum ether : ethyl acetate = 1 : 1.5).  $^1\text{H}$  NMR (600 MHz, DMSO- $d_6$ )  $\delta$  8.37 (t,  $J = 6.6$  Hz, 1H), 8.18 (d,  $J = 8.4$  Hz, 1H), 7.83 (d,  $J = 6.6$  Hz, 2H), 7.80 (d,  $J = 8.4$  Hz, 2H), 7.54 – 7.49 (t,  $J = 8.4$  Hz, 1H), 7.45 (t,  $J = 8.4$  Hz, 2H), 6.98 (d,  $J = 8.4$  Hz, 2H), 4.15 – 4.04 (m, 1H), 3.79 (s, 3H), 3.48 – 3.37 (m, 2H), 1.60 (m, 1H), 1.57 – 1.49 (m, 1H), 0.89 (t,  $J = 7.2$  Hz, 3H) ppm.  $^{13}\text{C}$  NMR (150 MHz, DMSO- $d_6$ )  $\delta$  166.4, 166.2, 161.5, 134.9, 131.0, 129.0, 128.2, 127.3, 126.9, 113.4, 55.3, 51.2, 42.9, 24.6, 10.6 ppm. HRMS calc'd for  $\text{C}_{19}\text{H}_{21}\text{N}_2\text{O}_3^-$  325.1558, found 325.1556  $[\text{M}-\text{H}]^-$ ; HPLC analysis: Daicel CHIRALPAK AD-3 *n*-hexane/*i*-PrOH = 80/20, flow rate = 1.0 mL/min,  $\lambda = 254$  nm, retention time:  $t_{\text{major}} = 11.06$  min,  $t_{\text{minor}} = 10.21$  min;  $[\alpha]_{\text{D}}^{20} = 33.56$  ( $c$  1.0, MeOH).

#### *tert*-Butyl-(*S*)-(2-(4-methoxybenzamido)propyl)carbamate (3fg)

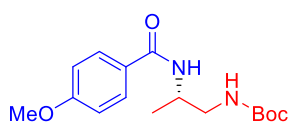

The reaction was performed with *tert*-butyl allylcarbamate **1f** (31.4 mg, 0.2 mmol) and 3-(4-methoxyphenyl)-1,4,2-dioxazol-5-one **2g** (77.2 mg, 0.4 mmol). The crude product was separated by flash chromatography on silica gel (petroleum ether : ethyl acetate = 1 : 1.5) to give the product **3fg** (22.2 mg, 36% yield, 94% *ee*) as a white solid. **Mp**: 158 – 160 °C. **R<sub>f</sub>** = 0.50 (petroleum ether : ethyl acetate = 1 : 1.5).  $^1\text{H}$  NMR

(400 MHz, DMSO- $d_6$ )  $\delta$  7.96 (d,  $J$  = 8.0 Hz, 1H), 7.80 (d,  $J$  = 8.8 Hz, 2H), 6.97 (d,  $J$  = 8.8 Hz, 2H), 6.93 (t,  $J$  = 6.0 Hz, 1H), 4.02 (m, 1H), 3.80 (s, 3H), 3.05 (m, 2H), 1.35 (s, 9H), 1.07 (d,  $J$  = 6.8 Hz, 3H) ppm.  $^{13}\text{C}$  NMR (100 MHz, DMSO- $d_6$ )  $\delta$  165.2, 161.4, 156.0, 129.1, 126.9, 113.3, 77.7, 55.3, 45.5, 44.8, 28.2, 17.9 ppm. **HRMS** calc'd for  $\text{C}_{16}\text{H}_{25}\text{N}_2\text{O}_4^+$  309.1809, found 309.1807  $[\text{M}+\text{H}]^+$ ; **HPLC analysis**: Daicel CHIRALPAK OJ-H  $n$ -hexane/ $i$ -PrOH = 80/20, flow rate = 1.0 mL/min,  $\lambda$  = 254 nm, retention time:  $t_{\text{major}}$  = 3.94 min,  $t_{\text{minor}}$  = 4.66 min;  $[\alpha]_{\text{D}}^{20}$  = 45.68 ( $c$  1.0, MeOH).

**(*S*)-*N*-(4-((4-Methoxyphenyl)amino)-4-oxobutan-2-yl)benzamide (5aa)**

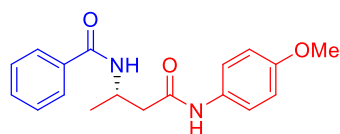

The reaction was performed with *N*-(4-methoxyphenyl)but-3-enamide **4a** (38.2 mg, 0.2 mmol) and 3-phenyl-1,4,2-dioxazol-5-one **2a** (65.2 mg, 0.4 mmol). The crude product was separated by flash chromatography on silica gel (petroleum ether : ethyl acetate = 1 : 1.5) to give the product **5aa** (50.5 mg, 81% yield, 98% *ee*) as a white solid. **Mp**: 209 – 211 °C. **R<sub>f</sub>** = 0.32 (petroleum ether : ethyl acetate = 1 : 1.5).  $^1\text{H}$  NMR (600 MHz, DMSO- $d_6$ )  $\delta$  9.80 (s, 1H), 8.34 (d,  $J$  = 8.0 Hz, 1H), 7.82 (d,  $J$  = 7.8 Hz, 2H), 7.48 – 7.35 (m, 5H), 6.86 (d,  $J$  = 8.4 Hz, 2H), 4.56 – 4.24 (m, 1H), 3.70 (s, 3H), 2.61 (dd,  $J$  = 14.4, 6.6 Hz, 1H), 2.49 – 2.45 (dd,  $J$  = 14.4, 6.6 Hz, 1H), 1.22 (d,  $J$  = 6.6 Hz, 3H) ppm.  $^{13}\text{C}$  NMR (150 MHz, DMSO- $d_6$ )  $\delta$  168.7, 165.5, 155.1, 134.8, 132.3, 131.1, 128.2, 127.2, 120.8, 113.8, 55.1, 43.0, 42.9, 20.3 ppm. **HRMS** calc'd for  $\text{C}_{18}\text{H}_{21}\text{N}_2\text{O}_3^+$  313.1547, found 313.1552  $[\text{M}+\text{H}]^+$ ; **HPLC analysis**: Daicel CHIRALPAK AD-3  $n$ -hexane/ $i$ -PrOH = 80/20, flow rate = 1.0 mL/min,  $\lambda$  = 254 nm, retention time:  $t_{\text{major}}$  = 8.57 min,  $t_{\text{minor}}$  = 17.81 min;  $[\alpha]_{\text{D}}^{20}$  = 62.58 ( $c$  1.0, MeOH).

**(*S*)-*N*-(4-((4-Methoxyphenyl)amino)-4-oxobutan-2-yl)-2-methylbenzamide (5ab)**

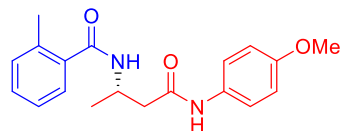

The reaction was performed with *N*-(4-methoxyphenyl)but-3-enamide **4a** (38.2 mg, 0.2 mmol) and 3-(*o*-tolyl)-1,4,2-dioxazol-5-one **2b** (70.8 mg, 0.4 mmol). The crude product was separated by flash chromatography on silica gel (petroleum ether : ethyl acetate = 1 : 1.5) to give the product **5ab** (54.1 mg, 83% yield, 99% *ee*) as a white solid. **Mp**: 196 – 198 °C. **R<sub>f</sub>** = 0.31 (petroleum ether : ethyl acetate = 1 : 1.5).  $^1\text{H}$  NMR (400 MHz, Chloroform- $d$ )  $\delta$  7.92 (s, 1H), 7.46 – 7.39 (m, 2H), 7.35 (dd,  $J$  = 7.6, 1.6 Hz, 1H), 7.29 (td,  $J$  = 7.6, 1.6 Hz, 1H), 7.21 – 7.14 (m, 2H), 6.90 –

6.81 (m, 2H), 6.72 (d,  $J = 8.4$  Hz, 1H), 4.57 (dt,  $J = 13.2, 6.4$  Hz, 1H), 3.79 (s, 3H), 2.75 (dd,  $J = 15.2, 4.8$  Hz, 1H), 2.63 (dd,  $J = 15.2, 4.8$  Hz, 1H), 2.42 (s, 3H), 1.41 (d,  $J = 6.8$  Hz, 3H) ppm.  $^{13}\text{C}$  NMR (100 MHz, Chloroform- $d$ )  $\delta$  170.2, 169.2, 156.7, 136.3, 136.1, 131.2, 130.9, 130.1, 127.0, 126.0, 122.1, 114.3, 55.6, 43.4, 43.3, 20.6, 19.9 ppm. HRMS calc'd for  $\text{C}_{19}\text{H}_{23}\text{N}_2\text{O}_3^+$  327.1703, found 327.1705  $[\text{M}+\text{H}]^+$ ; HPLC analysis: Daicel CHIRALPAK AD-3  $n$ -hexane/ $i$ -PrOH = 70/30, flow rate = 1.0 mL/min,  $\lambda = 254$  nm, retention time:  $t_{\text{major}} = 6.96$  min,  $t_{\text{minor}} = 10.80$  min;  $[\alpha]_{\text{D}}^{20} = 20.91$  ( $c$  1.0, MeOH).

**(S)-2-Methoxy-*N*-(4-((4-methoxyphenyl)amino)-4-oxobutan-2-yl)benzamide (5ac)**

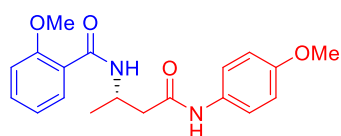

The reaction was performed with *N*-(4-methoxyphenyl)but-3-enamide **4a** (38.2 mg, 0.2 mmol) and 3-(2-methoxyphenyl)-1,4,2-dioxazol-5-one **2c** (77.2 mg, 0.4 mmol).

The crude product was separated by flash chromatography on silica gel (petroleum ether : ethyl acetate = 1 : 1.5) to give the product **5ac** (59.5 mg, 87% yield, 97% *ee*) as a white solid. **Mp**: 198 – 200 °C. **R<sub>f</sub>** = 0.21 (petroleum ether : ethyl acetate = 1 : 1.5).  $^1\text{H}$  NMR (400 MHz, DMSO- $d_6$ )  $\delta$  9.90 (s, 1H), 8.56 (d,  $J = 8.0$  Hz, 1H), 7.79 (dd,  $J = 7.6, 2.0$  Hz, 1H), 7.61 – 7.49 (m, 2H), 7.47 – 7.40 (m, 1H), 7.12 (dd,  $J = 8.4, 1.2$  Hz, 1H), 7.03 (td,  $J = 7.6, 1.2$  Hz, 1H), 6.93 – 6.78 (m, 2H), 4.47 – 4.29 (m, 1H), 3.88 (s, 3H), 3.72 (s, 3H), 2.60 (dd,  $J = 14.4, 6.0$  Hz, 1H), 2.54 – 2.51 (dd,  $J = 14.4, 6.0$  Hz, 1H), 1.23 (d,  $J = 6.8$  Hz, 3H) ppm.  $^{13}\text{C}$  NMR (100 MHz, DMSO- $d_6$ )  $\delta$  168.9, 163.9, 157.0, 155.2, 132.2, 130.5, 122.9, 120.8, 120.5, 113.8, 112.1, 55.8, 55.1, 42.7, 42.1, 20.1 ppm. HRMS calc'd for  $\text{C}_{19}\text{H}_{23}\text{N}_2\text{O}_4^+$  343.1652, found 343.1647  $[\text{M}+\text{H}]^+$ ; HPLC analysis: Daicel CHIRALPAK AD-3  $n$ -hexane/ $i$ -PrOH = 70/30, flow rate = 1.0 mL/min,  $\lambda = 254$  nm, retention time:  $t_{\text{major}} = 12.78$  min,  $t_{\text{minor}} = 15.98$  min;  $[\alpha]_{\text{D}}^{20} = 19.24$  ( $c$  1.0, MeOH).

**(S)-*N*-(4-((4-Methoxyphenyl)amino)-4-oxobutan-2-yl)-3-methylbenzamide (5ad)**

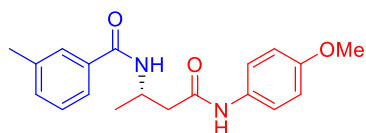

The reaction was performed with *N*-(4-methoxyphenyl)but-3-enamide **4a** (38.2 mg, 0.2 mmol) and 3-(*m*-tolyl)-1,4,2-dioxazol-5-one **2d** (70.8 mg, 0.4 mmol). The

crude product was separated by flash chromatography on silica gel (petroleum ether : ethyl acetate = 1 : 1.5) to give the product **5ad** (52.1 mg, 80% yield, 97% *ee*) as a white solid. **Mp**: 160 – 162 °C. **R<sub>f</sub>** = 0.29 (petroleum ether : ethyl acetate = 1 : 1.5).  $^1\text{H}$  NMR (400 MHz, DMSO- $d_6$ )  $\delta$  9.81 (s, 1H), 8.30 (d,

$J = 8.0$  Hz, 1H), 7.64 (d,  $J = 1.6$  Hz, 1H), 7.61 (dt,  $J = 6.0, 2.4$  Hz, 1H), 7.53 – 7.46 (m, 2H), 7.38 – 7.29 (m, 2H), 6.89 – 6.83 (m, 2H), 4.50 – 4.34 (m, 1H), 3.71 (s, 3H), 2.61 (dd,  $J = 14.4, 6.4$  Hz, 1H), 2.50 – 2.44 (dd,  $J = 14.4, 6.4$  Hz, 1H), 2.35 (s, 3H), 1.22 (d,  $J = 6.8$  Hz, 3H) ppm.  $^{13}\text{C}$  NMR (100 MHz, DMSO- $d_6$ )  $\delta$  168.7, 165.6, 155.1, 137.4, 134.8, 132.3, 131.6, 128.1, 127.7, 124.4, 120.8, 113.8, 55.1, 42.9, 20.9, 20.3 ppm. **HRMS** calc'd for  $\text{C}_{19}\text{H}_{23}\text{N}_2\text{O}_3^+$  327.1703, found 327.1702  $[\text{M}+\text{H}]^+$ ; **HPLC analysis**: Daicel CHIRALPAK AD-3 *n*-hexane/*i*-PrOH = 70/30, flow rate = 1.0 mL/min,  $\lambda = 254$  nm, retention time:  $t_{\text{major}} = 5.30$  min,  $t_{\text{minor}} = 8.32$  min;  $[\alpha]_{\text{D}}^{20} = 12.35$  ( $c$  1.0, MeOH).

**(*S*)-3-Methoxy-*N*-(4-((4-methoxyphenyl)amino)-4-oxobutan-2-yl)benzamide (5ae)**

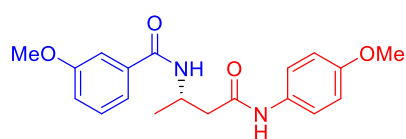

The reaction was performed with *N*-(4-methoxyphenyl)but-3-enamide **4a** (38.2 mg, 0.2 mmol) and 3-(3-methoxyphenyl)-1,4,2-dioxazol-5-one **2e** (77.2 mg,

0.4 mmol). The crude product was separated by flash chromatography on silica gel (petroleum ether : ethyl acetate = 1 : 1.5) to give the product **5ae** (58.1 mg, 85% yield, 98% *ee*) as a white solid. **Mp**: 175 – 177 °C. **R<sub>f</sub>** = 0.20 (petroleum ether : ethyl acetate = 1 : 1.5).  $^1\text{H}$  NMR (400 MHz, DMSO- $d_6$ )  $\delta$  9.81 (s, 1H), 8.34 (d,  $J = 8.0$  Hz, 1H), 7.53 – 7.46 (m, 2H), 7.42 – 7.33 (m, 3H), 7.09 – 7.05 (m, 1H), 6.91 – 6.77 (m, 2H), 4.53 – 4.46 (m, 1H), 3.79 (s, 3H), 3.71 (s, 3H), 2.62 (dd,  $J = 14.4, 6.4$  Hz, 1H), 2.47 (dd,  $J = 14.4, 6.4$  Hz, 1H), 1.22 (d,  $J = 6.8$  Hz, 3H) ppm.  $^{13}\text{C}$  NMR (100 MHz, DMSO- $d_6$ )  $\delta$  168.7, 165.3, 159.1, 155.2, 136.3, 132.3, 129.4, 120.8, 119.5, 116.8, 113.8, 112.6, 55.3, 55.1, 43.1, 42.9, 20.3 ppm. **HRMS** calc'd for  $\text{C}_{19}\text{H}_{23}\text{N}_2\text{O}_4^+$  343.1652, found 343.1656  $[\text{M}+\text{H}]^+$ ; **HPLC analysis**: Daicel CHIRALPAK AD-3 *n*-hexane/*i*-PrOH = 80/20, flow rate = 1.0 mL/min,  $\lambda = 254$  nm, retention time:  $t_{\text{major}} = 8.28$  min,  $t_{\text{minor}} = 16.84$  min;  $[\alpha]_{\text{D}}^{20} = 28.39$  ( $c$  1.0, MeOH).

**(*S*)-4-Fluoro-*N*-(4-((4-methoxyphenyl)amino)-4-oxobutan-2-yl)benzamide (5ah)**

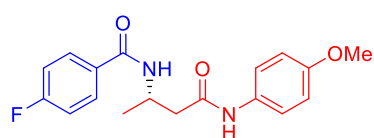

The reaction was performed with *N*-(4-methoxyphenyl)but-3-enamide **4a** (38.2 mg, 0.2 mmol) and 3-(4-fluorophenyl)-1,4,2-dioxazol-5-one **2h** (72.4 mg, 0.4 mmol).

The crude product was separated by flash chromatography on silica gel (petroleum ether : ethyl acetate = 1 : 1.5) to give the product **5ah** (49.5 mg, 75% yield, 96% *ee*) as a white solid. **Mp**: 227 – 229 °C. **R<sub>f</sub>** = 0.28 (petroleum ether : ethyl acetate = 1 : 1.5).  $^1\text{H}$  NMR (400 MHz, DMSO- $d_6$ )  $\delta$  9.80 (s, 1H), 8.38

(d,  $J = 8.0$  Hz, 1H), 7.98 – 7.90 (m, 2H), 7.54 – 7.43 (m, 2H), 7.31 – 7.26 (m, 2H), 6.96 – 6.77 (m, 2H), 4.51 – 4.30 (m, 1H), 3.70 (s, 3H), 2.61 (dd,  $J = 14.4, 6.4$  Hz, 1H), 2.46 (dd,  $J = 14.4, 6.4$  Hz, 1H), 1.21 (d,  $J = 6.8$  Hz, 3H) ppm.  $^{13}\text{C}$  NMR (100 MHz, DMSO- $d_6$ )  $\delta$  168.6, 164.5, 163.8 (d,  $J_1 = 246.5$  Hz), 155.2, 132.3, 131.2 (d,  $J_4 = 3.2$  Hz), 129.9 (d,  $J_3 = 8.6$  Hz), 120.8, 115.1 (d,  $J_2 = 21.3$  Hz), 113.8, 55.1, 43.1, 42.9, 20.2 ppm.  $^{19}\text{F}$  NMR (376 MHz, DMSO- $d_6$ )  $\delta$  -109.75 ppm. **HRMS** calc'd for  $\text{C}_{18}\text{H}_{20}\text{FN}_2\text{O}_3^+$  331.1452, found 331.1453  $[\text{M}+\text{H}]^+$ ; **HPLC analysis**: Daicel CHIRALPAK AD-3 *n*-hexane/*i*-PrOH = 70/30, flow rate = 1.0 mL/min,  $\lambda = 254$  nm, retention time:  $t_{\text{major}} = 6.76$  min,  $t_{\text{minor}} = 11.65$  min;  $[\alpha]_{\text{D}}^{20} = 10.65$  ( $c$  1.0, MeOH).

**(S)-4-Chloro-N-(4-((4-methoxyphenyl)amino)-4-oxobutan-2-yl)benzamide (5ai)**

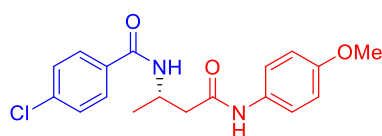

The reaction was performed with *N*-(4-methoxyphenyl)but-3-enamide **4a** (38.2 mg, 0.2 mmol) and 3-(4-chlorophenyl)-1,4,2-dioxazol-5-one **2i** (78.8 mg, 0.4 mmol).

The crude product was separated by flash chromatography on silica gel (petroleum ether : ethyl acetate = 1 : 1.5) to give the product **5ai** (50.5 mg, 73% yield, 91% *ee*) as a white solid. **Mp**: 236 – 238 °C. **R<sub>f</sub>** = 0.26 (petroleum ether : ethyl acetate = 1 : 1.5).  $^1\text{H}$  NMR (400 MHz, DMSO- $d_6$ )  $\delta$  9.81 (s, 1H), 8.45 (d,  $J = 8.0$  Hz, 1H), 7.97 – 7.82 (m, 2H), 7.57 – 7.52 (m, 2H), 7.51 – 7.45 (m, 2H), 6.90 – 6.83 (m, 2H), 4.56 – 4.23 (m, 1H), 3.71 (s, 3H), 2.62 (dd,  $J = 14.4, 6.4$  Hz, 1H), 2.48 (dd,  $J = 14.4, 6.4$  Hz, 1H), 1.22 (d,  $J = 6.8$  Hz, 3H) ppm.  $^{13}\text{C}$  NMR (100 MHz, DMSO- $d_6$ )  $\delta$  168.6, 164.5, 155.2, 135.9, 133.5, 132.3, 129.2, 128.3, 120.8, 113.8, 55.1, 43.1, 42.9, 20.2 ppm. **HRMS** calc'd for  $\text{C}_{18}\text{H}_{20}\text{ClN}_2\text{O}_3^+$  347.1157, found 347.1155  $[\text{M}+\text{H}]^+$ ; **HPLC analysis**: Daicel CHIRALPAK AD-3 *n*-hexane/*i*-PrOH = 70/30, flow rate = 1.0 mL/min,  $\lambda = 254$  nm, retention time:  $t_{\text{major}} = 9.12$  min,  $t_{\text{minor}} = 13.10$  min;  $[\alpha]_{\text{D}}^{20} = 27.38$  ( $c$  1.0, MeOH).

**(S)-4-Bromo-N-(4-((4-methoxyphenyl)amino)-4-oxobutan-2-yl)benzamide (5aj)**

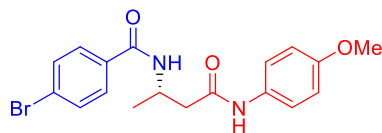

The reaction was performed with *N*-(4-methoxyphenyl)but-3-enamide **4a** (38.2 mg, 0.2 mmol) and 3-(4-bromophenyl)-1,4,2-dioxazol-5-one **2j** (96.8 mg, 0.4 mmol).

The crude product was separated by flash chromatography on silica gel (petroleum ether : ethyl acetate = 1 : 1.5) to give the product **5aj** (59.4 mg, 76% yield, 99% *ee*) as a white solid. **Mp**: 253 – 255 °C. **R<sub>f</sub>**

= 0.27 (petroleum ether : ethyl acetate = 1 : 1.5). **<sup>1</sup>H NMR** (400 MHz, DMSO-*d*<sub>6</sub>) δ 9.80 (s, 1H), 8.45 (d, *J* = 8.0 Hz, 1H), 7.85 – 7.73 (m, 2H), 7.73 – 7.62 (m, 2H), 7.51 – 7.46 (m, 2H), 6.89 – 6.84 (m, 2H), 4.52 – 4.40 (m, 1H), 3.71 (s, 3H), 2.61 (dd, *J* = 14.4, 6.4 Hz, 1H), 2.46 (dd, *J* = 14.4, 6.4 Hz, 1H), 1.22 (d, *J* = 6.8 Hz, 3H) ppm. **<sup>13</sup>C NMR** (100 MHz, DMSO-*d*<sub>6</sub>) δ 168.5, 164.5, 155.1, 133.9, 132.3, 131.2, 129.4, 124.8, 120.8, 113.8, 55.1, 43.1, 42.8, 20.2 ppm. **HRMS** calc'd for C<sub>18</sub>H<sub>20</sub>BrN<sub>2</sub>O<sub>3</sub><sup>+</sup> 391.0652, found 391.0647 [M+H]<sup>+</sup>; **HPLC analysis**: Daicel CHIRALPAK AD-3 *n*-hexane/*i*-PrOH = 70/30, flow rate = 1.0 mL/min, λ = 254 nm, retention time: *t*<sub>major</sub> = 12.09 min, *t*<sub>minor</sub> = 17.14 min; [α]<sub>D</sub><sup>20</sup> = 19.20 (c 1.0, MeOH).

**(*S*)-*N*-(4-((4-Methoxyphenyl)amino)-4-oxobutan-2-yl)-4-(trifluoromethoxy)benzamide (5ak)**

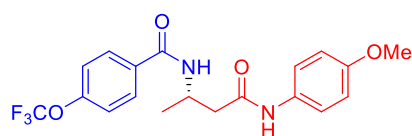

The reaction was performed with *N*-(4-methoxyphenyl)but-3-enamide **4a** (38.2 mg, 0.2 mmol) and 3-(4-(trifluoromethoxy)phenyl)-1,4,2-dioxazol-5-one **2k** (98.8 mg, 0.4 mmol). The crude product was separated by flash chromatography on silica gel (petroleum ether : ethyl acetate = 1 : 1.5) to give the product **5ak** (61.8 mg, 78% yield, 91% *ee*) as a white solid. **Mp**: 242 – 244 °C. **R<sub>f</sub>** = 0.22 (petroleum ether : ethyl acetate = 1 : 1.5). **<sup>1</sup>H NMR** (400 MHz, DMSO-*d*<sub>6</sub>) δ 9.82 (s, 1H), 8.48 (d, *J* = 8.0 Hz, 1H), 7.98 – 7.89 (m, 2H), 7.47 (dd, *J* = 9.2, 7.2 Hz, 4H), 6.89 – 6.83 (m, 2H), 4.52 – 4.30 (m, 1H), 3.70 (s, 3H), 2.61 (dd, *J* = 14.4, 6.4 Hz, 1H), 2.47 (dd, *J* = 14.4, 6.4 Hz, 1H), 1.21 (d, *J* = 6.8 Hz, 3H) ppm. **<sup>13</sup>C NMR** (100 MHz, DMSO-*d*<sub>6</sub>) δ 168.5, 164.3, 155.2, 150.2, 133.9, 132.3, 129.6, 120.8, 120.6, 119.9(q, *J*<sub>I</sub> = 255.3 Hz), 113.8, 55.1, 43.1, 42.8, 20.2 ppm. **<sup>19</sup>F NMR** (377 MHz, DMSO-*d*<sub>6</sub>) δ -56.71 ppm. **HRMS** calc'd for C<sub>19</sub>H<sub>20</sub>F<sub>3</sub>N<sub>2</sub>O<sub>4</sub><sup>+</sup> 397.1370, found 397.1373 [M+H]<sup>+</sup>; **HPLC analysis**: Daicel CHIRALPAK AD-3 *n*-hexane/*i*-PrOH = 80/20, flow rate = 1.0 mL/min, λ = 254 nm, retention time: *t*<sub>major</sub> = 8.38 min, *t*<sub>minor</sub> = 11.37 min; [α]<sub>D</sub><sup>20</sup> = 36.35 (c 1.0, MeOH).

**(*S*)-*N*-(4-((4-Methoxyphenyl)amino)-4-oxobutan-2-yl)-4-((trifluoromethyl)thio)benzamide (5am)**

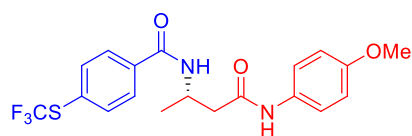

The reaction was performed with *N*-(4-methoxyphenyl)but-3-enamide **4a** (38.2 mg, 0.2 mmol) and 3-(4-((trifluoromethyl)thio)phenyl)-1,4,2-dioxazol-5-one **2m** (104.8 mg, 0.4 mmol). The crude product was separated by flash chromatography on silica gel

(petroleum ether : ethyl acetate = 1 : 1.5) to give the product **5am** (54.4 mg, 66% yield, 99% *ee*) as a white solid. **mp**: 246 – 248 °C. **R<sub>f</sub>** = 0.24 (petroleum ether : ethyl acetate = 1 : 1.5). **<sup>1</sup>H NMR** (400 MHz, DMSO-*d*<sub>6</sub>) δ 9.82 (s, 1H), 8.56 (d, *J* = 8.0 Hz, 1H), 8.01 – 7.90 (m, 2H), 7.81 (d, *J* = 8.4 Hz, 2H), 7.53 – 7.41 (m, 2H), 6.91 – 6.81 (m, 2H), 4.52 – 4.36 (m, 1H), 3.70 (s, 3H), 2.61 (dd, *J* = 14.4, 6.4 Hz, 1H), 2.47 (dd, *J* = 14.4, 6.4 Hz, 1H), 1.22 (d, *J* = 6.8 Hz, 3H) ppm. **<sup>13</sup>C NMR** (100 MHz, DMSO-*d*<sub>6</sub>) δ 168.5, 164.6, 155.2, 137.5, 135.9, 132.3, 129.5(q, *J<sub>I</sub>* = 306.3 Hz), 128.7, 126.0, 120.8, 113.8, 55.1, 43.2, 42.8, 20.2 ppm. **<sup>19</sup>F NMR** (376 MHz, DMSO-*d*<sub>6</sub>) δ -41.70 ppm. **HRMS** calc'd for C<sub>19</sub>H<sub>20</sub>F<sub>3</sub>N<sub>2</sub>O<sup>+</sup> 413.1141, found 413.1139 [M+H]<sup>+</sup>; **HPLC analysis**: Daicel CHIRALPAK AD-3 *n*-hexane/*i*-PrOH = 80/20, flow rate = 1.0 mL/min, λ = 254 nm, retention time: *t*<sub>major</sub> = 7.16 min, *t*<sub>minor</sub> = 15.35 min; [α]<sub>D</sub><sup>20</sup> = 22.30 (*c* 1.0, MeOH).

**(*S*)-*N*-(4-((4-Methoxyphenyl)amino)-4-oxobutan-2-yl)benzo[*d*][1,3]dioxole-5-carboxamide (5an)**

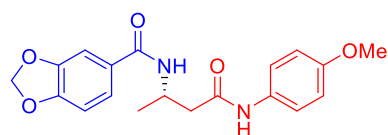

The reaction was performed with *N*-(4-methoxyphenyl)but-3-enamide **4a** (38.2 mg, 0.2 mmol) and 3-(benzo[*d*][1,3]dioxol-5-yl)-1,4,2-dioxazol-5-one **2n** (82.8 mg, 0.4 mmol). The crude product was separated by flash chromatography on silica gel (petroleum ether : ethyl acetate = 1 : 1.5) to give the product **5an** (60.5 mg, 85% yield, 99% *ee*) as a white solid. **mp**: 256 – 258 °C. **R<sub>f</sub>** = 0.18 (petroleum ether : ethyl acetate = 1 : 1.5). **<sup>1</sup>H NMR** (400 MHz, DMSO-*d*<sub>6</sub>) δ 9.79 (s, 1H), 8.18 (d, *J* = 8.0 Hz, 1H), 7.51 – 7.45 (m, 2H), 7.42 (dd, *J* = 8.0, 1.6 Hz, 1H), 7.37 (d, *J* = 1.6 Hz, 1H), 6.98 (d, *J* = 8.0 Hz, 1H), 6.89 – 6.82 (m, 2H), 6.08 (s, 2H), 4.48 – 4.24 (m, 1H), 3.70 (s, 3H), 2.59 (dd, *J* = 14.4, 6.4 Hz, 1H), 2.46 (dd, *J* = 14.4, 6.4 Hz, 1H), 1.20 (d, *J* = 6.8 Hz, 3H) ppm. **<sup>13</sup>C NMR** (100 MHz, DMSO-*d*<sub>6</sub>) δ 168.7, 164.6, 155.2, 149.6, 147.3, 132.3, 128.8, 122.2, 120.8, 113.8, 107.8, 107.4, 101.6, 55.1, 43.0, 43.0, 20.3 ppm. **HRMS** calc'd for C<sub>19</sub>H<sub>21</sub>N<sub>2</sub>O<sub>5</sub><sup>+</sup> 357.1445, found 357.1444 [M+H]<sup>+</sup>; **HPLC analysis**: Daicel CHIRALPAK AD-3 *n*-hexane/*i*-PrOH = 80/20, flow rate = 1.0 mL/min, λ = 254 nm, retention time: *t*<sub>major</sub> = 12.01 min, *t*<sub>minor</sub> = 29.74 min; [α]<sub>D</sub><sup>20</sup> = 12.18 (*c* 1.0, MeOH).

**(*S*)-*N*-(4-((4-Methoxyphenyl)amino)-4-oxobutan-2-yl)thiophene-2-carboxamide (5al)**

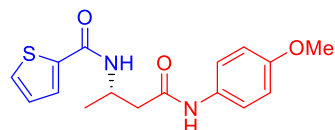

The reaction was performed with *N*-(4-methoxyphenyl)but-3-enamide **4a** (38.2 mg, 0.2 mmol) and 3-(thiophen-2-yl)-1,4,2-dioxazol-5-one

**2l** (67.6 mg, 0.4 mmol). The crude product was separated by flash chromatography on silica gel (petroleum ether : ethyl acetate = 1 : 1.5) to give the product **5al** (51.5 mg, 81% yield, 94% *ee*) as a white solid. **Mp**: 244 – 246 °C. **R<sub>f</sub>** = 0.20 (petroleum ether : ethyl acetate = 1 : 1.5). **<sup>1</sup>H NMR** (400 MHz, DMSO-*d*<sub>6</sub>) δ 9.79 (s, 1H), 8.36 (d, *J* = 8.0 Hz, 1H), 7.79 – 7.70 (dd, *J* = 8.0, 4.4 Hz, 2H), 7.53 – 7.44 (m, 2H), 7.13 (dd, *J* = 5.2, 3.6 Hz, 1H), 6.91 – 6.81 (m, 2H), 4.44 – 4.28 (m, 1H), 3.70 (s, 3H), 2.61 (dd, *J* = 14.4, 6.4 Hz, 1H), 2.46 (dd, *J* = 14.4, 6.4 Hz, 1H), 1.21 (d, *J* = 6.8 Hz, 3H) ppm. **<sup>13</sup>C NMR** (100 MHz, DMSO-*d*<sub>6</sub>) δ 168.5, 160.3, 155.1, 140.3, 132.3, 130.6, 127.9, 127.8, 120.8, 113.8, 55.1, 43.0, 42.9, 20.3 ppm. **HRMS** calc'd for C<sub>16</sub>H<sub>19</sub>N<sub>2</sub>O<sub>3</sub>S<sup>+</sup> 319.1111, found 319.1115 [M+H]<sup>+</sup>; **HPLC analysis**: Daicel CHIRALPAK AD-3 *n*-hexane/*i*-PrOH = 70/30, flow rate = 1.0 mL/min, λ = 254 nm, retention time: *t*<sub>major</sub> = 6.91 min, *t*<sub>minor</sub> = 14.26 min; [α]<sub>D</sub><sup>20</sup> = 21.04 (*c* 1.0, MeOH).

**(S)-N-(4-Methoxyphenyl)-3-pivalamidobutanamide (5ao)**

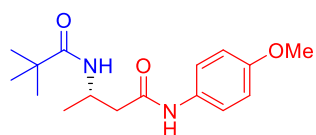

The reaction was performed with *N*-(4-methoxyphenyl)but-3-enamide **4a** (38.2 mg, 0.2 mmol) and 3-(tert-butyl)-1,4,2-dioxazol-5-one **2o** (57.2 mg, 0.4 mmol). The crude product was separated by flash chromatography on silica gel (petroleum ether : ethyl acetate = 1 : 1.5) to give the product **5ao** (38.5 mg, 66% yield, 91% *ee*) as a white solid. **Mp**: 153 – 155 °C. **R<sub>f</sub>** = 0.30 (petroleum ether : ethyl acetate = 1 : 1.5). **<sup>1</sup>H NMR** (400 MHz, DMSO-*d*<sub>6</sub>) δ 9.72 (s, 1H), 7.51 – 7.42 (m, 2H), 7.30 (d, *J* = 8.0 Hz, 1H), 6.91 – 6.79 (m, 2H), 4.17 (dt, *J* = 14.0, 6.8 Hz, 1H), 3.70 (s, 3H), 2.47 (dd, *J* = 14.0, 7.2 Hz, 1H), 2.37 (dd, *J* = 14.0, 7.2 Hz, 1H), 1.10 (d, *J* = 6.8 Hz, 3H), 1.06 (s, 9H) ppm. **<sup>13</sup>C NMR** (100 MHz, DMSO-*d*<sub>6</sub>) δ 176.5, 168.9, 155.1, 132.3, 120.8, 113.8, 55.1, 42.7, 42.4, 37.9, 27.4, 20.2 ppm. **HRMS** calc'd for C<sub>16</sub>H<sub>25</sub>N<sub>2</sub>O<sub>3</sub><sup>+</sup> 293.1860, found 293.1855 [M+H]<sup>+</sup>; **HPLC analysis**: Daicel CHIRALPAK AD-3 *n*-hexane/*i*-PrOH = 80/20, flow rate = 1.0 mL/min, λ = 254 nm, retention time: *t*<sub>major</sub> = 4.72 min, *t*<sub>minor</sub> = 10.44 min; [α]<sub>D</sub><sup>20</sup> = 20.20 (*c* 1.0, MeOH).

**(S)-N-(4-(Benzylamino)-4-oxobutan-2-yl)benzamide (5ba)**

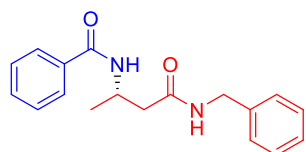

The reaction was performed with *N*-benzylbut-3-enamide **4b** (35.0 mg, 0.2 mmol) and 3-phenyl-1,4,2-dioxazol-5-one **2a** (57.2 mg, 0.4 mmol). The crude product was separated by flash chromatography on silica gel (petroleum ether : ethyl acetate = 1 : 1.5) to give the product **5ba** (50.9 mg, 86% yield, 96% *ee*) as a

white solid. **Mp**: 192 – 194 °C. **R<sub>f</sub>** = 0.33 (petroleum ether : ethyl acetate = 1 : 1.5). **<sup>1</sup>H NMR** (400 MHz, DMSO-*d*<sub>6</sub>) δ 8.41 (t, *J* = 6.0 Hz, 1H), 8.32 (d, *J* = 8.0 Hz, 1H), 7.91 – 7.74 (m, 2H), 7.59 – 7.52 (m, 1H), 7.50 – 7.39 (m, 2H), 7.33 – 7.11 (m, 5H), 4.44 – 4.34 (m, 1H), 4.36 – 4.19 (m, 2H), 2.53 (dd, *J* = 14.0, 7.6 Hz, 1H), 2.37 (dd, *J* = 14.0, 7.6 Hz, 1H), 1.18 (d, *J* = 6.8 Hz, 3H) ppm. **<sup>13</sup>C NMR** (100 MHz, DMSO-*d*<sub>6</sub>) δ 170.2, 165.4, 139.5, 134.8, 131.0, 128.2, 127.2, 127.1, 126.7, 43.0, 42.0, 42.0, 20.3 ppm. **HRMS** calc'd for C<sub>18</sub>H<sub>21</sub>N<sub>2</sub>O<sub>2</sub><sup>+</sup> 297.1598, found 297.1593 [M+H]<sup>+</sup>; **HPLC analysis**: Daicel CHIRALPAK AD-3 *n*-hexane/*i*-PrOH = 80/20, flow rate = 1.0 mL/min, λ = 254 nm, retention time: *t*<sub>major</sub> = 12.23 min, *t*<sub>minor</sub> = 32.67 min; [α]<sub>D</sub><sup>20</sup> = 21.66 (*c* 1.0, MeOH).

**(S)-N-(1-((4-Methoxyphenyl)amino)-1-oxohexan-3-yl)benzamide (5ca)**

The reaction was performed with 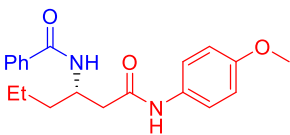 (*E*)-*N*-(4-methoxyphenyl)hex-3-enamide **4c** (43.8 mg, 0.2 mmol) and 3-phenyl-1,4,2-dioxazol-5-one **2a** (57.2 mg, 0.4 mmol). The crude product was separated by flash chromatography on silica gel (petroleum ether : ethyl acetate = 1 : 1.5) to give the product **5ca** (25.8 mg, 38% yield, 98% *ee*) as a white solid. **Mp**: 200 – 202 °C. **R<sub>f</sub>** = 0.35 (petroleum ether : ethyl acetate = 1 : 1.5). **<sup>1</sup>H NMR** (400 MHz, DMSO-*d*<sub>6</sub>) δ 9.79 (s, 1H), 8.26 (d, *J* = 8.4 Hz, 1H), 7.88 – 7.77 (m, 2H), 7.54 – 7.49 (m, 1H), 7.49 – 7.43 (m, 4H), 6.86 (d, *J* = 8.8 Hz, 2H), 4.38 (m, 1H), 3.71 (s, 3H), 2.54 (m, 2H), 1.63 – 1.50 (m, 2H), 1.40 – 1.27 (m, 2H), 0.88 (t, *J* = 7.2 Hz, 3H) ppm. **<sup>13</sup>C NMR** (100 MHz, DMSO-*d*<sub>6</sub>) δ 168.7, 165.8, 155.1, 134.9, 132.3, 131.0, 128.2, 127.2, 120.8, 113.8, 55.2, 46.7, 42.0, 36.2, 19.0, 13.9 ppm. **HRMS** calc'd for C<sub>20</sub>H<sub>23</sub>N<sub>2</sub>O<sub>3</sub><sup>+</sup> 339.1714, found 339.1733 [M+H]<sup>+</sup>; **HPLC analysis**: Daicel CHIRALPAK AD-3 *n*-hexane/*i*-PrOH = 80/20, flow rate = 1.0 mL/min, λ = 254 nm, retention time: *t*<sub>major</sub> = 8.59 min, *t*<sub>minor</sub> = 12.96 min; [α]<sub>D</sub><sup>20</sup> = 32.58 (*c* 1.0, MeOH).

**(S)-N-(1-((4-Methoxyphenyl)amino)-1-oxoheptan-3-yl)benzamide (5da)**

The reaction was performed with 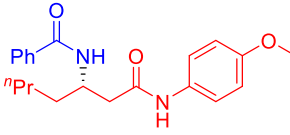 (*E*)-*N*-(4-methoxyphenyl)hept-3-enamide **4d** (46.6 mg, 0.2 mmol) and 3-phenyl-1,4,2-dioxazol-5-one **2a** (57.2 mg, 0.4 mmol). The crude product was separated by flash chromatography on silica gel (petroleum ether : ethyl acetate = 1 : 1.5) to give the product **5da** (21.2 mg, 30% yield, 95% *ee*) as a white solid. **Mp**: 208 – 210 °C. **R<sub>f</sub>** = 0.33 (petroleum ether : ethyl acetate = 1 : 1.5). **<sup>1</sup>H NMR** (400 MHz, DMSO-*d*<sub>6</sub>) δ 9.78 (s, 1H), 8.25 (d, *J* =

8.4 Hz, 1H), 7.90 – 7.74 (m, 2H), 7.55 – 7.48 (m, 1H), 7.48 – 7.42 (m, 4H), 6.90 – 6.78 (m, 2H), 4.36 (h,  $J = 7.2$  Hz, 1H), 3.70 (s, 3H), 2.53 (m, 2H), 1.57 (d,  $J = 6.8$  Hz, 2H), 1.28 (m, 4H), 0.88 – 0.82 (t,  $J = 6.8$  Hz, 3H) ppm.  **$^{13}\text{C}$  NMR** (100 MHz, DMSO- $d_6$ )  $\delta$  168.7, 165.8, 155.1, 134.9, 132.3, 131.0, 128.2, 127.2, 120.8, 113.8, 55.1, 46.9, 42.0, 33.6, 27.9, 22.0, 14.0 ppm. **HRMS** calc'd for  $\text{C}_{21}\text{H}_{25}\text{N}_2\text{O}_3^-$  353.1871, found 353.1873 [M-H] $^-$ ; **HPLC analysis:** Daicel CHIRALPAK AD-3 *n*-hexane/*i*-PrOH = 80/20, flow rate = 1.0 mL/min,  $\lambda = 254$  nm, retention time:  $t_{\text{major}} = 10.47$  min,  $t_{\text{minor}} = 13.40$  min;  $[\alpha]_{\text{D}}^{20} = 35.39$  (*c* 1.0, MeOH).

## Hydroamidation of natural products and bioactive molecules derivatives

Same as standard condition, in a glove box under a nitrogen atmosphere, NiBr<sub>2</sub> (4.4 mg, 0.02 mmol, 10 mol%) and **L5** (12.6 mg, 0.03 mmol, 15 mol%) were added to a dry 8 ml reaction vial containing a magnetic stir bar. Then, 2 ml of anhydrous DMA was added to the mixture, which was stirred at room temperature for 10 minutes. Subsequently, (MeO)<sub>3</sub>SiH (50 mg, 0.4 mmol, 2.0 equiv.) and NaI (15 mg, 0.1 mmol, 50 mol%) were sequentially added to the mixture and stirred. *N*-allyl-amides **1** or but-3-enamides **3** were then added to the mixture and finally 1,4,2-dioxazol-5-ones **2** were added. The reaction vial was sealed and taken out of the glove box, and the mixture was stirred at room temperature for 48 hours. After the completion of the reaction, 2 ml of EA was added to the reaction vial for dilution. Extraction was performed using 50 ml of EA and 20 ml of saturated NaCl solution. The organic phase was further extracted using 2×30 ml of saturated NaCl solution. The organic phase was then dried using anhydrous Na<sub>2</sub>SO<sub>4</sub> and the solvent was removed under vacuum. The crude material was loaded onto a silica gel column and purified by flash chromatography to obtain **6-11**.

### *N*-((*S*)-1-((*S*)-2-(6-Methoxynaphthalen-2-yl)propanamido)propan-2-yl)benzamide (**6**)

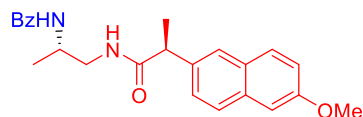

The reaction was performed with (*S*)-*N*-allyl-2-(6-methoxynaphthalen-2-yl)propanamide **1g** (53.8 mg, 0.2 mmol) and 3-phenyl-1,4,2-dioxazol-5-one **2a** (57.2 mg, 0.4 mmol). The crude product was separated by flash chromatography on silica gel (petroleum ether : ethyl acetate = 1 : 1.5) to give the product **6** (60.1 mg, 77% yield, 96% de) as a white solid. **Mp**: 202 – 204 °C. **R<sub>f</sub>** = 0.23 (petroleum ether : ethyl acetate = 1 : 1.5). **<sup>1</sup>H NMR** (400 MHz, DMSO-*d*<sub>6</sub>) δ 8.22 – 8.05 (m, 2H), 7.78 – 7.72 (m, 2H), 7.72 – 7.67 (m, 2H), 7.65 (d, *J* = 8.4 Hz, 1H), 7.51 – 7.46 (m, 1H), 7.39 (td, *J* = 8.4, 1.6 Hz, 3H), 7.22 (d, *J* = 2.4 Hz, 1H), 7.11 (dd, *J* = 9.2, 2.4 Hz, 1H), 4.16 – 4.00 (m, 1H), 3.85 (s, 3H), 3.74 (q, *J* = 7.2 Hz, 1H), 3.20 (td, *J* = 6.4, 3.6 Hz, 2H), 1.41 (d, *J* = 7.2 Hz, 3H), 1.06 (d, *J* = 6.8 Hz, 3H) ppm. **<sup>13</sup>C NMR** (100 MHz, DMSO-*d*<sub>6</sub>) δ 174.0, 165.9, 157.0, 137.3, 134.7, 133.1, 131.0, 129.1, 128.4, 128.1, 127.2, 126.6, 126.5, 125.2, 118.5, 105.7, 55.1, 45.4, 45.1, 43.6, 18.5, 18.0 ppm. **HRMS** calc'd for C<sub>24</sub>H<sub>27</sub>N<sub>2</sub>O<sub>3</sub><sup>+</sup> 391.2016, found 391.2013 [M+H]<sup>+</sup>; **HPLC analysis**: Daicel CHIRALPAK AD-3 *n*-hexane/*i*-PrOH = 90/10, flow rate = 1.0 mL/min, λ = 254 nm, retention time: *t*<sub>major</sub> = 11.62 min, *t*<sub>minor</sub> = 13.28 min; [α]<sub>D</sub><sup>20</sup> = 5.55 (c 1.0, MeOH).

**(S)-N-(1-(2-(11-oxo-6,11-dihydrodibenzo[b,e]oxepin-3-yl)acetamido)propan-2-yl)benzamide (7)**

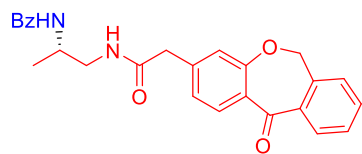

The reaction was performed with *N*-allyl-2-(11-oxo-6,11-dihydrodibenzo[*b,e*]oxepin-3-yl)acetamide **1h** (61.4 mg, 0.2 mmol) and 3-phenyl-1,4,2-dioxazol-5-one **2a** (57.2 mg, 0.4 mmol). The crude product was separated by flash chromatography on silica gel (petroleum ether : ethyl acetate = 1 : 1.5) to give the product **7** (68.5 mg, 80% yield, 90% ee) as a white solid. **Mp**: 216 – 218 °C. **R<sub>f</sub>** = 0.20 (petroleum ether : ethyl acetate = 1 : 1.5). **<sup>1</sup>H NMR** (400 MHz, DMSO-*d*<sub>6</sub>) δ 8.24 (t, *J* = 6.0 Hz, 1H), 8.17 (d, *J* = 8.0 Hz, 1H), 7.98 (d, *J* = 2.4 Hz, 1H), 7.77 (td, *J* = 7.6, 7.2, 1.2 Hz, 3H), 7.66 (td, *J* = 7.2, 1.2 Hz, 1H), 7.59 – 7.51 (m, 2H), 7.50 – 7.38 (m, 4H), 6.96 (d, *J* = 8.4 Hz, 1H), 5.25 (s, 2H), 4.19 – 3.96 (m, 1H), 3.46 (s, 2H), 3.22 (t, *J* = 6.8 Hz, 2H), 1.10 (d, *J* = 6.8 Hz, 3H) ppm. **<sup>13</sup>C NMR** (100 MHz, DMSO-*d*<sub>6</sub>) δ 190.2, 170.6, 165.8, 159.6, 140.0, 136.5, 135.9, 134.7, 133.0, 131.4, 131.0, 130.2, 129.2, 128.8, 128.3, 128.1, 127.2, 124.5, 120.5, 72.7, 45.4, 43.6, 41.2, 18.0 ppm. **HRMS** calc'd for C<sub>26</sub>H<sub>25</sub>N<sub>2</sub>O<sub>4</sub><sup>+</sup> 429.1809, found 429.1812 [M+H]<sup>+</sup>; **HPLC analysis**: Daicel CHIRALPAK AD-3 *n*-hexane/*i*-PrOH = 95/5, flow rate = 1.0 mL/min, λ = 254 nm, retention time: *t*<sub>major</sub> = 35.23 min, *t*<sub>minor</sub> = 37.60 min; [α]<sub>D</sub><sup>20</sup> = 19.64 (*c* 1.0, MeOH).

**(S)-N-(1-(2-(1-(4-Chlorobenzoyl)-5-methoxy-2-methyl-1H-indol-3-yl)acetamido)propan-2-yl)benzamide (8)**

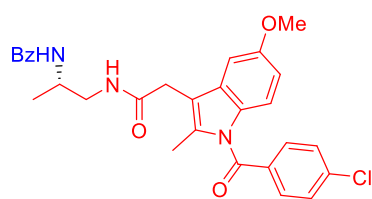

The reaction was performed with *N*-allyl-2-(1-(4-chlorobenzoyl)-5-methoxy-2-methyl-1H-indol-3-yl)acetamide **1i** (79.2 mg, 0.2 mmol) and 3-phenyl-1,4,2-dioxazol-5-one **2a** (57.2 mg, 0.4 mmol). The crude product was separated by flash chromatography on silica gel (petroleum ether : ethyl acetate = 1 : 2) to give the product **8** (83.9 mg, 81% yield, 91% ee) as a white solid. **Mp**: 196 – 198 °C. **R<sub>f</sub>** = 0.25 (petroleum ether : ethyl acetate = 1 : 2). **<sup>1</sup>H NMR** (400 MHz, DMSO-*d*<sub>6</sub>) δ 8.16 (d, *J* = 8.0 Hz, 1H), 8.12 (t, *J* = 6.0 Hz, 1H), 7.78 – 7.69 (m, 2H), 7.69 – 7.57 (m, 4H), 7.52 – 7.43 (m, 1H), 7.38 (dd, *J* = 8.4, 6.8 Hz, 2H), 7.11 (d, *J* = 2.4 Hz, 1H), 6.95 (d, *J* = 9.2 Hz, 1H), 6.69 (dd, *J* = 9.2, 2.4 Hz, 1H), 4.08 (dq, *J* = 15.2, 8.4 Hz, 1H), 3.73 (s, 3H), 3.53 (s, 2H), 3.32 – 3.13 (m, 2H), 2.17 (s, 3H), 1.10 (d, *J* = 6.8 Hz, 3H) ppm. **<sup>13</sup>C NMR** (100 MHz, DMSO-*d*<sub>6</sub>) δ 170.0, 167.8, 165.9, 155.6, 137.5, 135.2, 134.7, 134.3, 131.1, 131.0, 130.9, 130.3, 129.0, 128.1, 127.2, 114.6, 114.2, 111.4, 101.7, 55.4, 45.5, 43.8, 31.1, 18.0,

13.3 ppm. **HRMS** calc'd for  $C_{29}H_{29}ClN_3O_4^+$  518.1841, found 518.1844  $[M+H]^+$ ; **HPLC analysis:** Daicel CHIRALPAK AD-3 *n*-hexane/*i*-PrOH = 70/30, flow rate = 1.0 mL/min,  $\lambda$  = 254 nm, retention time:  $t_{major}$  = 7.58 min,  $t_{minor}$  = 11.02 min;  $[\alpha]_D^{20}$  = -7.43 (*c* 1.0, MeOH).

**(S)-2-((2-(4-Methoxybenzamido)propyl)carbamoyl)phenyl acetate (9)**

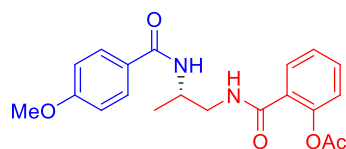

The reaction was performed with 2-(allylcarbamoyl)phenyl acetate **1j** (43.8 mg, 0.2 mmol) and 3-(4-methoxyphenyl)-1,4,2-dioxazol-5-one **2g** (77.2 mg, 0.4 mmol).

The crude product was separated by flash chromatography on silica gel (petroleum ether : ethyl acetate = 1 : 2) to give the product **9** (59.9 mg, 81% yield, 99% ee) as a white solid. **Mp**: 220 – 222 °C. **R<sub>f</sub>** = 0.22 (petroleum ether : ethyl acetate = 1 : 2). **<sup>1</sup>H NMR** (400 MHz, DMSO-*d*<sub>6</sub>)  $\delta$  8.39 (t, *J* = 6.0 Hz, 1H), 8.10 (d, *J* = 8.0 Hz, 1H), 7.84 – 7.80 (m, 2H), 7.55 (dd, *J* = 7.6, 1.6 Hz, 1H), 7.49 (td, *J* = 7.6, 1.6 Hz, 1H), 7.31 (td, *J* = 7.6, 1.2 Hz, 1H), 7.16 (dd, *J* = 8.0, 1.2 Hz, 1H), 7.00 – 6.96 (m, 2H), 4.19 (dt, *J* = 13.6, 6.8 Hz, 1H), 3.80 (s, 3H), 3.32 (t, *J* = 11.6 Hz, 2H), 2.16 (s, 3H), 1.15 (d, *J* = 6.8 Hz, 3H) ppm. **<sup>13</sup>C NMR** (100 MHz, DMSO-*d*<sub>6</sub>)  $\delta$  168.9, 165.7, 165.4, 161.5, 148.0, 131.2, 129.5, 129.1, 128.9, 127.0, 125.8, 123.3, 113.4, 55.4, 45.2, 44.1, 20.7, 18.0 ppm. **HRMS** calc'd for  $C_{20}H_{23}N_2O_5^+$  371.1601, found 371.1598  $[M+H]^+$ ; **HPLC analysis:** Daicel CHIRALPAK AD-3 *n*-hexane/*i*-PrOH = 80/20, flow rate = 1.0 mL/min,  $\lambda$  = 254 nm, retention time:  $t_{major}$  = 12.16 min,  $t_{minor}$  = 17.74 min;  $[\alpha]_D^{20}$  = 18.22 (*c* 1.0, MeOH).

**(S)-3-(3-(4,5-Diphenyloxazol-2-yl)propanamido)-N-(4-methoxyphenyl)butanamide (10)**

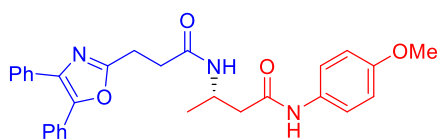

The reaction was performed with *N*-(4-methoxyphenyl)but-3-enamide **4a** (38.2 mg, 0.2 mmol) and

3-(2-(4,5-diphenyloxazol-2-yl)ethyl)-1,4,2-dioxazol-5-one **2p** (133.6 mg, 0.4 mmol). The crude product was separated by flash chromatography on silica gel (petroleum ether : ethyl acetate = 1 : 2) to give the product **10** (69.6 mg, 72% yield, 93% ee) as a white solid. **Mp**: 232 – 234 °C. **R<sub>f</sub>** = 0.18 (petroleum ether : ethyl acetate = 1 : 2). **<sup>1</sup>H NMR** (400 MHz, DMSO-*d*<sub>6</sub>)  $\delta$  9.76 (s, 1H), 8.00 (d, *J* = 8.0 Hz, 1H), 7.58 – 7.50 (m, 4H), 7.50 – 7.46 (m, 2H), 7.46 – 7.34 (m, 6H), 6.89 – 6.77 (m, 2H), 4.25 – 4.16 (m, 1H), 3.70 (s, 3H), 3.09 – 2.97 (m, 2H), 2.61 (td, *J* = 7.2, 1.6 Hz, 2H), 2.49 – 2.43 (m, 1H),

2.34 (dd,  $J = 14.0, 8.0$  Hz, 1H), 1.09 (d,  $J = 6.8$  Hz, 3H) ppm.  $^{13}\text{C}$  NMR (100 MHz, DMSO- $d_6$ )  $\delta$  169.6, 168.4, 162.7, 155.1, 144.5, 134.3, 132.3, 132.1, 129.0, 128.8, 128.7, 128.5, 128.1, 127.4, 126.4, 120.8, 113.8, 55.1, 43.1, 42.3, 31.9, 23.4, 20.2 ppm. **HRMS** calc'd for  $\text{C}_{29}\text{H}_{30}\text{N}_3\text{O}_4^+$  484.2231, found 484.2229  $[\text{M}+\text{H}]^+$ ; **HPLC analysis:** Daicel CHIRALPAK AD-3 *n*-hexane/*i*-PrOH = 80/20, flow rate = 1.0 mL/min,  $\lambda = 254$  nm, retention time:  $t_{\text{major}} = 8.45$  min,  $t_{\text{minor}} = 12.54$  min;  $[\alpha]_{\text{D}}^{20} = 31.51$  ( $c$  1.0, MeOH).

**(*S*)-3-((*S*)-2-(4-Isobutylphenyl)propanamido)-*N*-(4-methoxyphenyl)butanamide (11)**

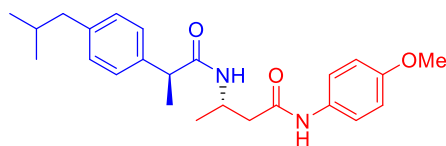

The reaction was performed with *N*-(4-methoxyphenyl)but-3-enamide **4a** (38.2 mg, 0.2 mmol) and

(*S*)-3-(1-(4-isobutylphenyl)ethyl)-1,4,2-dioxazol-5-one **2q** (98.8 mg, 0.4 mmol). The crude product was separated by flash chromatography on silica gel (petroleum ether : ethyl acetate = 1 : 1.5) to give the product **11** (53.8 mg, 68% yield, 96% de) as a white solid. **Mp**: 194 – 196 °C. **R<sub>f</sub>** = 0.22 (petroleum ether : ethyl acetate = 1 : 1.5).  $^1\text{H}$  NMR (400 MHz, DMSO- $d_6$ )  $\delta$  9.68 (s, 1H), 7.92 (d,  $J = 8.0$  Hz, 1H), 7.47 – 7.36 (m, 2H), 7.16 (d,  $J = 8.0$  Hz, 2H), 6.97 (d,  $J = 8.0$  Hz, 2H), 6.89 – 6.79 (m, 2H), 4.18 – 4.10 (m, 1H), 3.71 (s, 3H), 3.52 (q,  $J = 7.2$  Hz, 1H), 2.40 (dd,  $J = 14.4, 6.0$  Hz, 1H), 2.35 (d,  $J = 7.1$  Hz, 2H), 2.26 (dd,  $J = 14.4, 6.0$  Hz, 1H), 1.82 – 1.69 (m, 1H), 1.28 (d,  $J = 7.2$  Hz, 3H), 1.11 (d,  $J = 6.8$  Hz, 3H), 0.83 (d,  $J = 6.8$  Hz, 6H) ppm.  $^{13}\text{C}$  NMR (100 MHz, DMSO- $d_6$ )  $\delta$  172.6, 168.4, 155.1, 139.5, 139.0, 132.3, 128.7, 126.9, 120.7, 113.7, 55.1, 44.6, 44.3, 42.8, 42.3, 29.6, 22.2, 20.2, 18.4 ppm. **HRMS** calc'd for  $\text{C}_{24}\text{H}_{33}\text{N}_2\text{O}_3^+$  397.2486, found 397.2490  $[\text{M}+\text{H}]^+$ ; **HPLC analysis:** Daicel CHIRALPAK AD-3 *n*-hexane/*i*-PrOH = 80/20, flow rate = 1.0 mL/min,  $\lambda = 254$  nm, retention time:  $t_{\text{major}} = 5.09$  min,  $t_{\text{minor}} = 10.91$  min;  $[\alpha]_{\text{D}}^{20} = 72.05$  ( $c$  1.0, MeOH).

## Synthesis of (S)-Nicaraven

Same as standard condition, in a glove box under a nitrogen atmosphere, NiBr<sub>2</sub> (4.4 mg, 0.02 mmol, 10 mol%) and **L5** (12.6 mg, 0.03 mmol, 15 mol%) were added to a dry 8 ml reaction vial containing a magnetic stir bar. Then, 2 ml of anhydrous DMA was added to the mixture, which was stirred at room temperature for 10 minutes. Subsequently, (MeO)<sub>3</sub>SiH (50 mg, 0.4 mmol, 2.0 equiv.) and NaI (15 mg, 0.1 mmol, 50 mol%) were sequentially added to the mixture and stirred. *N*-allylnicotinamide **1k** (32.4 mg, 0.2 mmol, 1.0 equiv.) was then added to the mixture and finally 3-(pyridin-3-yl)-1,4,2-dioxazol-5-one **2r** (65.6 mg, 0.4 mmol, 2.0 equiv.) were added. The reaction vial was sealed and taken out of the glove box, and the mixture was stirred at room temperature for 48 hours. After the completion of the reaction, 2 ml of EA was added to the reaction vial for dilution. Extraction was performed using 50 ml of EA and 20 ml of saturated NaCl solution. The organic phase was further extracted using 2×30 ml of saturated NaCl solution. The organic phase was then dried using anhydrous Na<sub>2</sub>SO<sub>4</sub> and the solvent was removed under vacuum. The crude material was loaded onto a silica gel column and purified by flash chromatography to obtain (*S*)-Nicaraven.

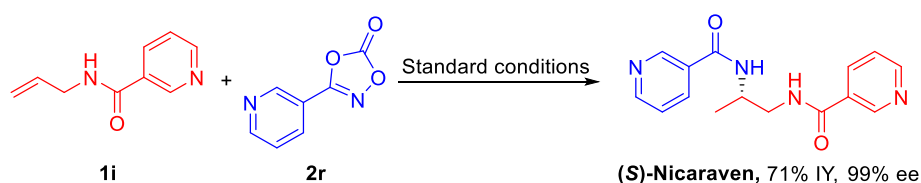

**(S)-N,N'-(Propane-1,2-diyl)dinicotinamide ((S)-Nicaraven)**

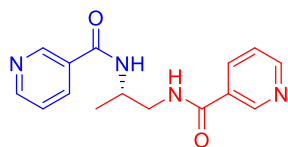

The crude product was separated by flash chromatography on silica gel (petroleum ether : ethyl acetate = 1 : 2) to give the product (40.3 mg, 71% yield, 99% *ee*) as a white solid. **Mp**: 154 – 156 °C. **R<sub>f</sub>** = 0.16 (petroleum ether : ethyl acetate = 1 : 2). **<sup>1</sup>H NMR** (400 MHz, DMSO-*d*<sub>6</sub>) δ 9.05 – 8.95 (m, 2H), 8.79 (t, *J* = 6.0 Hz, 1H), 8.68 (dt, *J* = 4.8, 1.2 Hz, 2H), 8.50 (d, *J* = 8.4 Hz, 1H), 8.15 (dd, *J* = 7.8, 5.6 Hz, 2H), 7.55 – 7.42 (m, 2H), 4.40 – 4.19 (m, 1H), 3.45 – 3.36 (m, 2H), 1.19 (d, *J* = 6.8 Hz, 3H) ppm. **<sup>13</sup>C NMR** (100 MHz, DMSO-*d*<sub>6</sub>) δ 165.4, 164.6, 151.8, 151.7, 148.5, 148.4, 135.1, 135.0, 130.3, 130.2, 123.5, 123.4, 45.4, 44.2, 17.9 ppm. **HRMS** calc'd for C<sub>15</sub>H<sub>17</sub>N<sub>4</sub>O<sub>2</sub><sup>+</sup> 285.1346, found 285.1347 [M+H]<sup>+</sup>; **HPLC analysis**: Daicel CHIRALPAK AD-3 *n*-hexane/*i*-PrOH = 80/20, flow rate = 1.0 mL/min, λ = 254 nm, retention time: *t*<sub>major</sub> = 24.04 min; [α]<sub>D</sub><sup>20</sup> = 28.02 (*c* 1.0, MeOH).

## Hydrolysis of 3ca

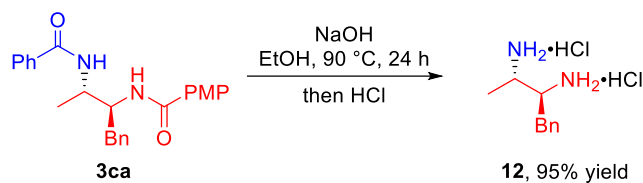

According to the literature.<sup>[17]</sup> In a dry 8 ml reaction vial containing a magnetic stirrer, **3ca** (38.7 mg, 0.1 mmol, 1.0 equiv), NaOH (80 mg, 2 mmol, 20.0 equiv), and finally 2 ml of anhydrous ethanol were added sequentially and after sealing the reaction vial, the reaction was carried out at 90°C for 24 h. After monitoring the completion of the reaction, the solvent was removed under vacuum. The crude product was dissolved using 10 ml of water and 20 ml of ethyl acetate, next 10 ml of 2N HCl solution was added to the mixture and the aqueous phase was collected. The aqueous phase was washed with ethyl acetate 20 ml×3 and the aqueous phase was evaporated directly under vacuum to give the product **12** in 22.5 mg, 95% yield.

### (2*S*,3*S*)-1-Phenylbutane-2,3-diaminium chloride (**12**)

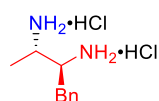

The product was obtained as white solid. **Mp**: 284 – 286 °C. **<sup>1</sup>H NMR** (400 MHz, Deuterium Oxide)  $\delta$  7.74 (m, 5H), 4.38 – 4.23 (m, 2H), 3.58 (dd,  $J$  = 14.4, 3.2 Hz, 1H), 3.23 (dd,  $J$  = 14.4, 3.2 Hz, 1H), 1.83 (d,  $J$  = 6.8 Hz, 3H) ppm. **<sup>13</sup>C NMR** (100 MHz, Deuterium Oxide)  $\delta$  134.4, 130.0, 128.7, 54.7, 48.9, 32.8, 13.5 ppm, one resonance was not observed due to overlapping peaks. **HRMS** calc'd for  $\text{C}_{10}\text{H}_{17}\text{N}_2^+$  ((2*S*,3*S*)-3-amino-1-phenylbutan-2-aminium) 165.1386, found 165.1380  $[\text{M}+\text{H}]^+$ ;  $[\alpha]_{\text{D}}^{20}$  = -44.50 ( $c$  1.0, MeOH).

### Capture of metal-nitrenoid intermediate.

In a glove box under a nitrogen atmosphere, NiBr<sub>2</sub> (4.4 mg, 0.02 mmol, 10 mol%) and **L5** (12.6 mg, 0.03 mmol, 15 mol%) were added to a dry 8 ml reaction vial containing a magnetic stir bar. Then, 2 ml of anhydrous DMA was added to the mixture, which was stirred at room temperature for 10 minutes. Subsequently, (MeO)<sub>3</sub>SiH (50 mg, 0.4 mmol, 2.0 equiv.) and NaI (15 mg, 0.1 mmol, 50 mol%) were sequentially added to the mixture and stirred. Finally 3-phenyl-1,4,2-dioxazol-5-one **2a** (65.2 mg, 0.4 mmol) and **PPh<sub>3</sub>** (209.8 mg, 0.8 mmol, 2.0 equiv.) were added. The reaction vial was sealed and taken out of the glove box, and the mixture was stirred at room temperature for 48 hours. After the completion of the reaction, 2 ml of EA was added to the reaction vial for dilution. Extraction was performed using 50 ml of EA and 20 ml of saturated NaCl solution. The organic phase was further extracted using 2×30 ml of saturated NaCl solution. The organic phase was then dried using anhydrous Na<sub>2</sub>SO<sub>4</sub> and the solvent was removed under vacuum. The crude material was loaded onto a silica gel column and purified by flash chromatography to obtain metal-nitrenoid intermediate **13**. In addition, no generation of **13** was detected in the absence of the Ni catalyst.

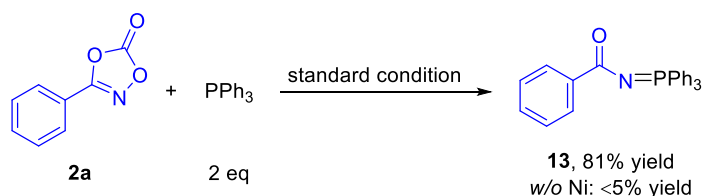

### N-(Triphenyl-λ5-phosphanylidene)benzamide (**13**)

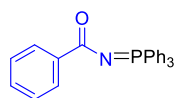

The crude product was separated by flash chromatography on silica gel (petroleum ether : ethyl acetate = 4 : 1) to give the product (61.9 mg, 71% yield) as a white solid. *R<sub>f</sub>* = 0.45 (petroleum ether : ethyl acetate = 4 : 1). <sup>1</sup>H NMR (400 MHz, Chloroform-*d*) δ 8.43 – 8.34 (m, 2H), 7.93 – 7.80 (m, 6H), 7.60 – 7.53 (m, 3H), 7.53 – 7.39 (m, 9H) ppm. <sup>13</sup>C NMR (100 MHz, Chloroform-*d*) δ 176.4 (d, *J*<sub>C-P</sub> = 7.7 Hz), 138.6 (d, *J*<sub>C-P</sub> = 20.5 Hz), 133.2 (d, *J*<sub>C-P</sub> = 9.9 Hz), 132.3 (d, *J*<sub>C-P</sub> = 3.0 Hz), 130.8, 129.6 (d, *J*<sub>C-P</sub> = 2.4 Hz), 128.8 (d, *J*<sub>C-P</sub> = 12.1 Hz), 128.4 (d, *J*<sub>C-P</sub> = 99.0 Hz), 127.7 ppm. <sup>31</sup>P NMR (162 MHz, Chloroform-*d*) δ 20.73 ppm. The <sup>1</sup>H, <sup>13</sup>C{<sup>1</sup>H} and <sup>31</sup>P data for this compound match the literature data.<sup>[18]</sup>

## Competitive experiment

In a glove box under a nitrogen atmosphere, NiBr<sub>2</sub> (2.2 mg, 0.01 mmol, 10 mol%) and **L5** (6.3 mg, 0.015 mmol, 15 mol%) were added to a dry 8 ml reaction vial containing a magnetic stir bar. Then, 1 ml of anhydrous DMA was added to the mixture, which was stirred at room temperature for 10 minutes. Subsequently, (MeO)<sub>3</sub>SiH (25 mg, 0.2 mmol, 2.0 equiv.) and NaI (7.5 mg, 0.05 mmol, 50 mol%) were sequentially added to the mixture and stirred. Finally *N*-allyl-4-methoxybenzamide **1a** (19.1 mg, 0.1 mmol, 1.0 equiv.), 3-(4-Methoxyphenyl)-1,4,2-dioxazol-5-one **2g** (38.6 mg, 0.2 mmol, 2.0 equiv.) and 3-(4-Bromophenyl)-1,4,2-dioxazol-5-one **2j** (48.2 mg, 0.2 mmol, 2.0 equiv.) were added. The reaction vial was sealed and taken out of the glove box, and the mixture was stirred at room temperature for 48 hours. After the completion of the reaction, 2 ml of EA was added to the reaction vial for dilution. Extraction was performed using 50 ml of EA and 20 ml of saturated NaCl solution. The organic phase was further extracted using 2×30 ml of saturated NaCl solution. The organic phase was then dried using anhydrous Na<sub>2</sub>SO<sub>4</sub> and the solvent was removed under vacuum. The crude material was loaded onto a silica gel column and purified by flash chromatography to obtain **3ag** (24.6 mg, 36% yield) and **3aj** (23.4 mg, 30% yield), yield of **3ag** : **3aj** = 1.2 : 1

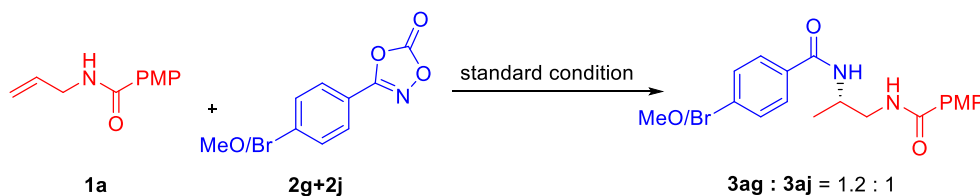

### X-ray crystal structure of compound 5ba

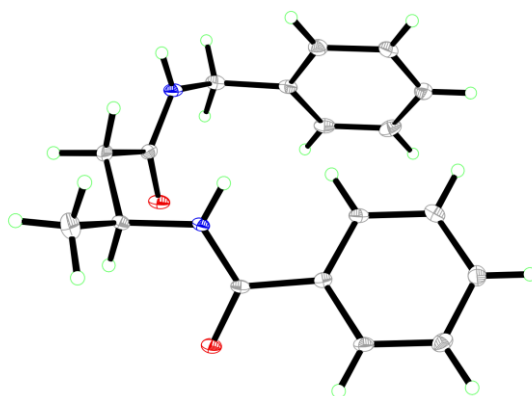

**Crystal structure of 5ba (CCDC 2293468)**

A specimen of  $C_{18}H_{20}N_2O_2$ , approximate dimensions 0.100 mm x 0.120 mm x 0.210 mm, was used for the X-ray crystallographic analysis. The X-ray intensity data were measured ( $\lambda = 1.54178 \text{ \AA}$ ).

The integration of the data using a monoclinic unit cell yielded a total of 25726 reflections to a maximum  $\theta$  angle of  $77.36^\circ$  ( $0.79 \text{ \AA}$  resolution), of which 3249 were independent (average redundancy 7.918, completeness = 99.7%,  $R_{\text{int}} = 5.30\%$ ,  $R_{\text{sig}} = 2.98\%$ ) and 3192 (98.25%) were greater than  $2\sigma(F^2)$ . The final cell constants of  $a = 36.827(3) \text{ \AA}$ ,  $b = 5.0991(3) \text{ \AA}$ ,  $c = 8.2493(6) \text{ \AA}$ ,  $\beta = 92.460(2)^\circ$ , volume =  $1547.66(18) \text{ \AA}^3$ , are based upon the refinement of the XYZ-centroids of reflections above  $20 \sigma(I)$ . The calculated minimum and maximum transmission coefficients (based on crystal size) are 0.5856 and 0.7541.

The structure was solved and refined using the Bruker SHELXTL Software Package, using the space group  $C 1 2 1$ , with  $Z = 4$  for the formula unit,  $C_{18}H_{20}N_2O_2$ . The final anisotropic full-matrix least-squares refinement on  $F^2$  with 176 variables converged at  $R1 = 6.06\%$ , for the observed data and  $wR2 = 16.04\%$  for all data. The goodness-of-fit was 1.091. The largest peak in the final difference electron density synthesis was  $0.438 \text{ e/\AA}^3$  and the largest hole was  $-0.265 \text{ e/\AA}^3$  with an RMS deviation of  $0.074 \text{ e/\AA}^3$ . On the basis of the final model, the calculated density was  $1.272 \text{ g/cm}^3$  and  $F(000)$ , 632  $e^-$ .

**Table S7. Sample and crystal data for 5ba.**

|                     |                       |
|---------------------|-----------------------|
| Identification code | 5ba                   |
| Chemical formula    | $C_{18}H_{20}N_2O_2$  |
| Formula weight      | 296.36 g/mol          |
| Wavelength          | $1.54178 \text{ \AA}$ |

|                        |                                                                                                                                                             |
|------------------------|-------------------------------------------------------------------------------------------------------------------------------------------------------------|
| Crystal size           | 0.100 x 0.120 x 0.210 mm                                                                                                                                    |
| Crystal system         | monoclinic                                                                                                                                                  |
| Space group            | C 1 2 1                                                                                                                                                     |
| Unit cell dimensions   | $a = 36.827(3) \text{ \AA}$ $\alpha = 90^\circ$<br>$b = 5.0991(3) \text{ \AA}$ $\beta = 92.460(2)^\circ$<br>$c = 8.2493(6) \text{ \AA}$ $\gamma = 90^\circ$ |
| Volume                 | $1547.66(18) \text{ \AA}^3$                                                                                                                                 |
| Z                      | 4                                                                                                                                                           |
| Density (calculated)   | $1.272 \text{ g/cm}^3$                                                                                                                                      |
| Absorption coefficient | $0.668 \text{ mm}^{-1}$                                                                                                                                     |
| F(000)                 | 632                                                                                                                                                         |

**Table S8. Data collection and structure refinement for 5ba.**

|                                 |                                                                                                       |
|---------------------------------|-------------------------------------------------------------------------------------------------------|
| Theta range for data collection | 2.40 to $77.36^\circ$                                                                                 |
| Index ranges                    | $-46 \leq h \leq 46$ , $-6 \leq k \leq 6$ , $-10 \leq l \leq 10$                                      |
| Reflections collected           | 25726                                                                                                 |
| Independent reflections         | 3249 [R(int) = 0.0530]                                                                                |
| Max. and min. transmission      | 0.7541 and 0.5856                                                                                     |
| Structure solution technique    | direct methods                                                                                        |
| Structure solution program      | SHELXT 2018/2 (Sheldrick, 2018)                                                                       |
| Refinement method               | Full-matrix least-squares on $F^2$                                                                    |
| Refinement program              | SHELXL 2018/3 (Sheldrick, 2015)                                                                       |
| Function minimized              | $\Sigma w(F_o^2 - F_c^2)^2$                                                                           |
| Data / restraints / parameters  | 3249 / 1 / 176                                                                                        |
| Goodness-of-fit on $F^2$        | 1.091                                                                                                 |
| Final R indices                 | 3192 data; $I > 2\sigma(I)$ $R1 = 0.0606$ , $wR2 = 0.1600$<br>all data $R1 = 0.0613$ , $wR2 = 0.1604$ |
| Weighting scheme                | $w = 1/[\sigma^2(F_o^2) + (0.0589P)^2 + 5.1821P]$<br>where $P = (F_o^2 + 2F_c^2)/3$                   |
| Absolute structure parameter    | 0.04(16)                                                                                              |
| Largest diff. peak and hole     | 0.438 and $-0.265 \text{ e\AA}^{-3}$                                                                  |
| R.M.S. deviation from mean      | $0.074 \text{ e\AA}^{-3}$                                                                             |

## Supplementary references

- [1] Yang, P.-F.; Liang, J.-X.; Zhao, H.-T.; Shu, W. *ACS Catal.* **2022**, *12*, 9638-9645.
- [2] Zhao, H.; Gao, Q.; Zhang, Y.; Zhang, P.; Xu, S. *Org. Lett.* **2020**, *22*, 2861-2866.
- [3] Han, X.; Floreancig, P. E. *Angew. Chem. Int. Ed.* **2014**, *53*, 11075-11078.
- [4] Makhal, P. N.; Dannarm, S. R.; Shaikh, A. S.; Ahmed, R.; Chilvery, S.; Dayare, L. N.; Sonti, R.; Godugu, C.; Kaki, V. R. *Chem. Commun.* **2023**, *59*, 3767-3770.
- [5] Le Saux, E.; Georgiou, E.; Dmitriev, I. A.; Hartley, W. C.; Melchiorre, P. *J. Am. Chem. Soc.* **2023**, *145*, 47-52.
- [6] Wang, Q.; Ni, S.; Yu, L.; Pan, Y.; Wang, Y. *ACS Catal.* **2022**, *12*, 11071-11077.
- [7] Liu, W.; Yang, W.; Zhu, J.; Guo, Y.; Wang, N.; Ke, J.; Yu, P.; He, C. *ACS Catal.* **2020**, *10*, 7207-7215.
- [8] Huang, Y.; Pi, C.; Tang, Z.; Wu, Y.; Cui, X. *Chin. Chem. Lett.* **2020**, *31*, 3237-3240.
- [9] Adegboyega, A. K.; Son, J. *Org. Lett.* **2022**, *24*, 4925-4929.
- [10] Liang, Z.; Wang, K.; Sun, Q.; Peng, Y.; Bao, X. *Chem. Commun.* **2023**, *59*, 752-755.
- [11] Lee, M.; Heo, J.; Kim, D.; Chang, S. *J. Am. Chem. Soc.* **2022**, *144*, 3667-3675.
- [12] Chen, S. Y.; Zheng, Y. C.; Liu, X. G.; Song, J. L.; Shu, B.; Zheng, T.; Xiao, L.; Zhang, S. S.; Cao, H. *Adv. Synth. Catal.* **2022**, *364*, 3302-3309.
- [13] Zhang, J. X.; Shu, W. *Org. Lett.* **2022**, *24*, 3844-3849.
- [14] Gurak, J. A., Jr.; Yang, K. S.; Liu, Z.; Engle, K. M. *J. Am. Chem. Soc.* **2016**, *138*, 5805-5808.
- [15] Wang, G.; Liang, X.; Chen, L.; Gao, Q.; Wang, J.-G.; Zhang, P.; Peng, Q.; Xu, S. *Angew. Chem. Int. Ed.* **2019**, *58*, 8187-8191.
- [16] Bernardim, B.; Burtoloso, A. C. B. *Tetrahedron* **2014**, *70*, 3291-3296.
- [17] Ai, W.; Shi, R.; Zhu, L.; Jiang, D.; Ma, X.; Yuan, J.; Wang, Z. *RSC Adv.* **2015**, *5*, 24044-24048.
- [18] Tang, J. J.; Yu, X.; Wang, Y.; Yamamoto, Y.; Bao, M. *Angew. Chem. Int. Ed.* **2021**, *60*, 16426-16435.



Figure S3.  $^1\text{H}$  NMR spectra (400 MHz, Chloroform- $d$ ) of (*S*)-4-Methoxy-*N*-(1-phenylbut-3-en-2-yl)benzamide (1c).

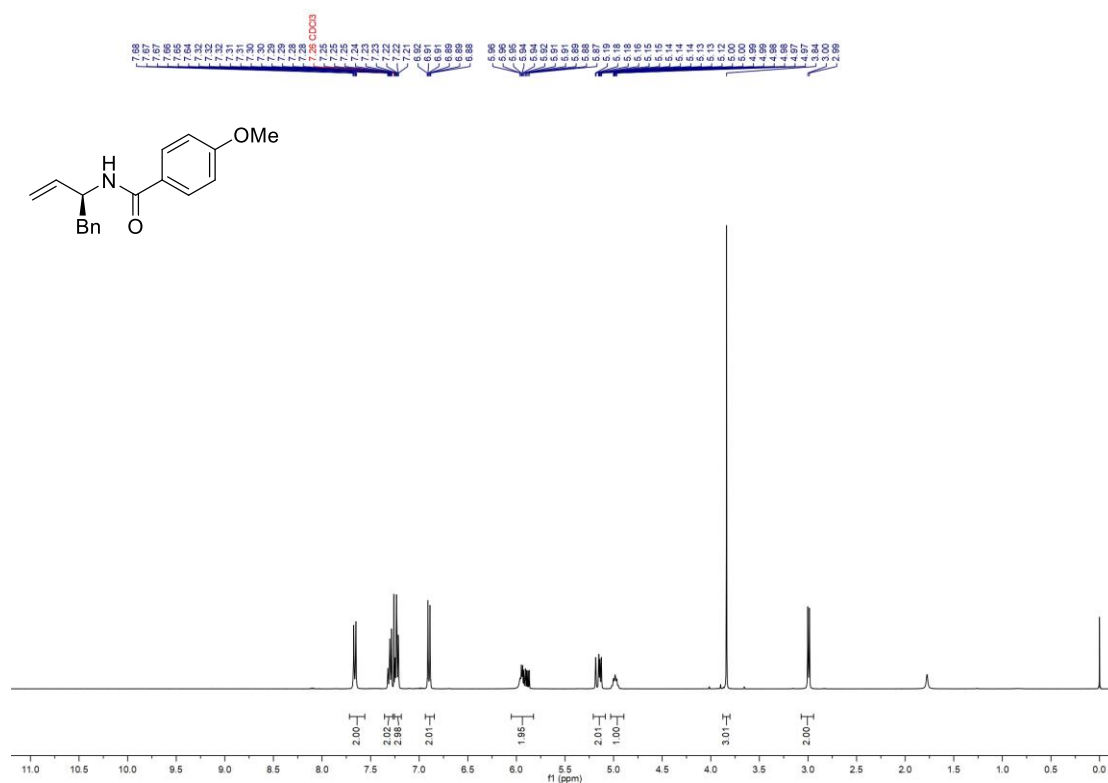

Figure S4.  $^{13}\text{C}$  NMR spectra (100 MHz, Chloroform- $d$ ) of (*S*)-4-Methoxy-*N*-(1-phenylbut-3-en-2-yl)benzamide (1c).

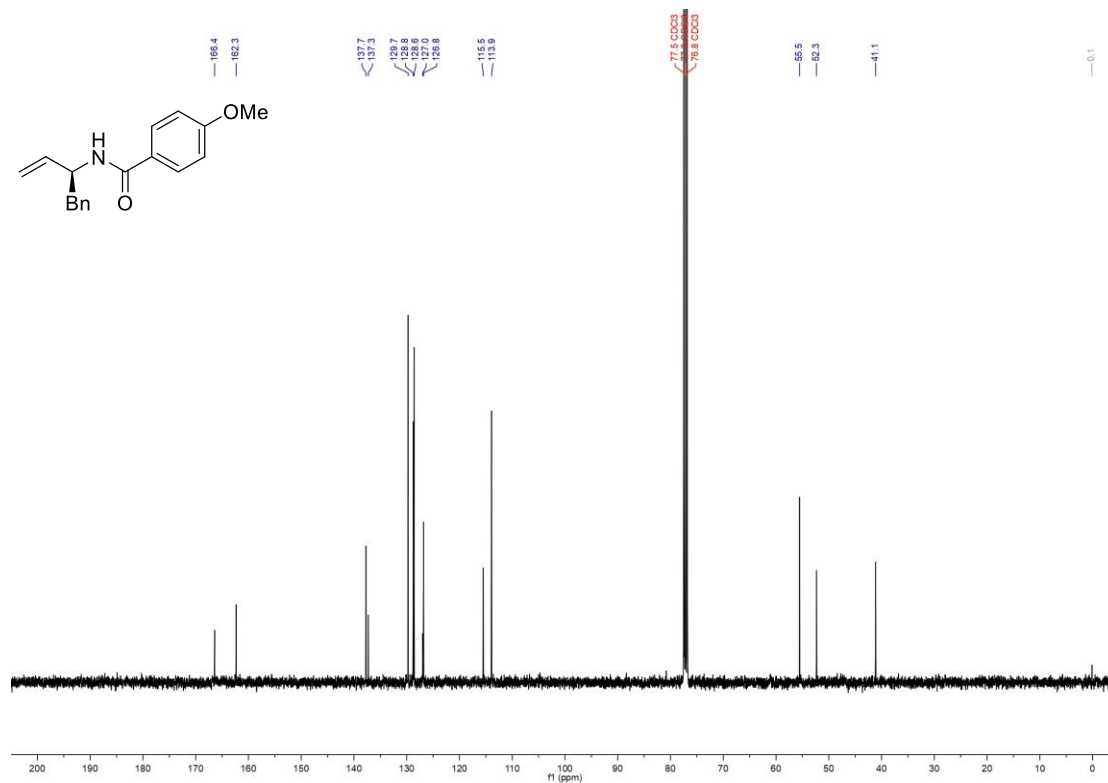

Figure S5.  $^1\text{H}$  NMR spectra (400 MHz, Chloroform-*d*) of (*R*)-*N*-(1-Cyclohexylallyl)-4-methoxybenzamide (1d).

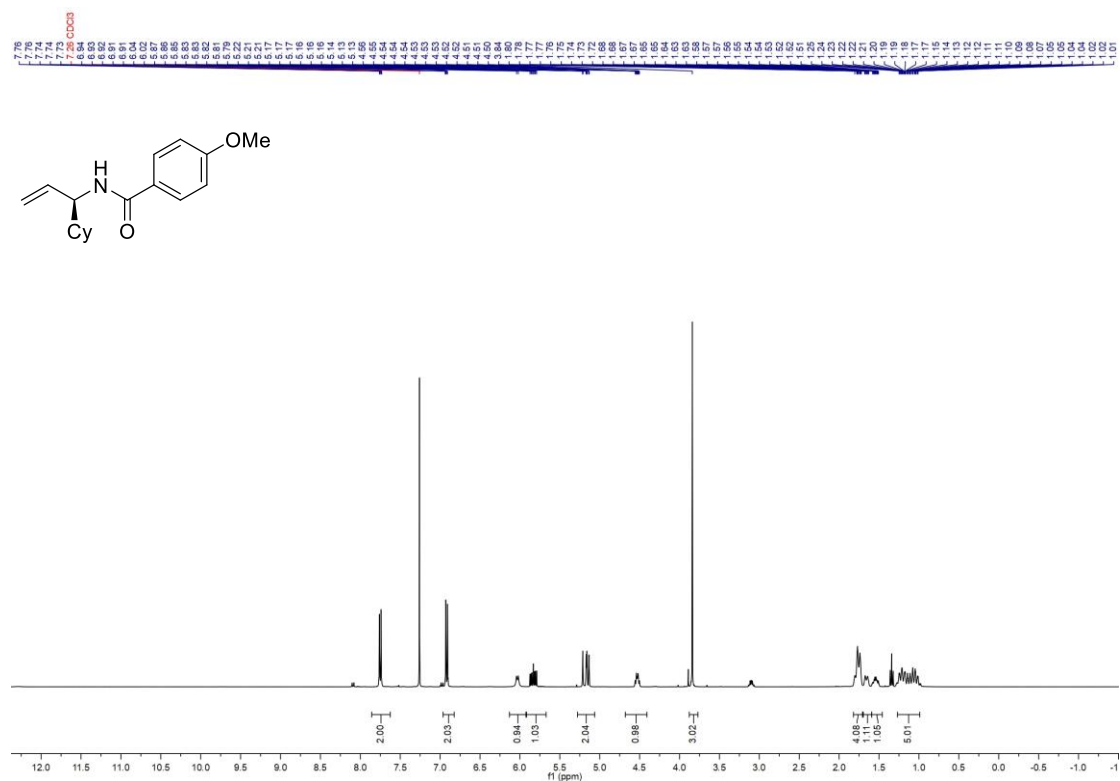

Figure S6.  $^{13}\text{C}$  NMR spectra (100 MHz, Chloroform-*d*) of (*R*)-*N*-(1-Cyclohexylallyl)-4-methoxybenzamide (1d).

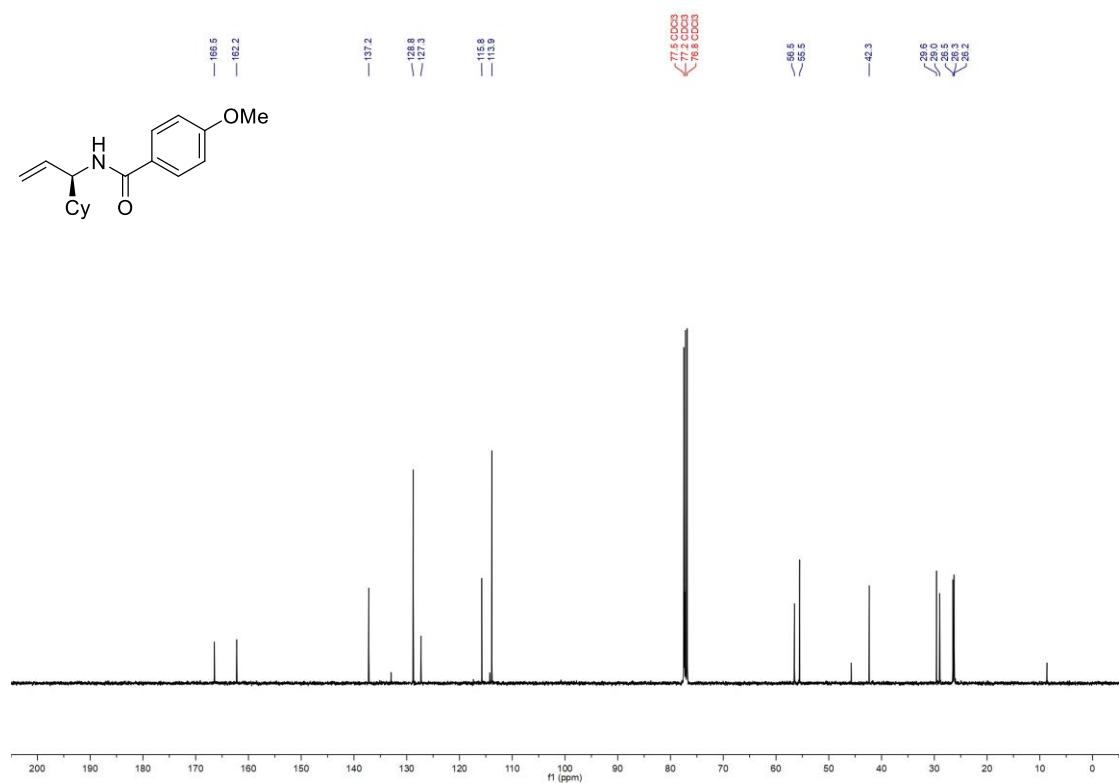

Figure S7.  $^1\text{H}$  NMR spectra (400 MHz, Chloroform- $d$ ) of *N*-Allyl-2-(11-oxo-6,11-dihydrodibenzo[*b,e*]oxepin-3-yl)acetamide (1f).

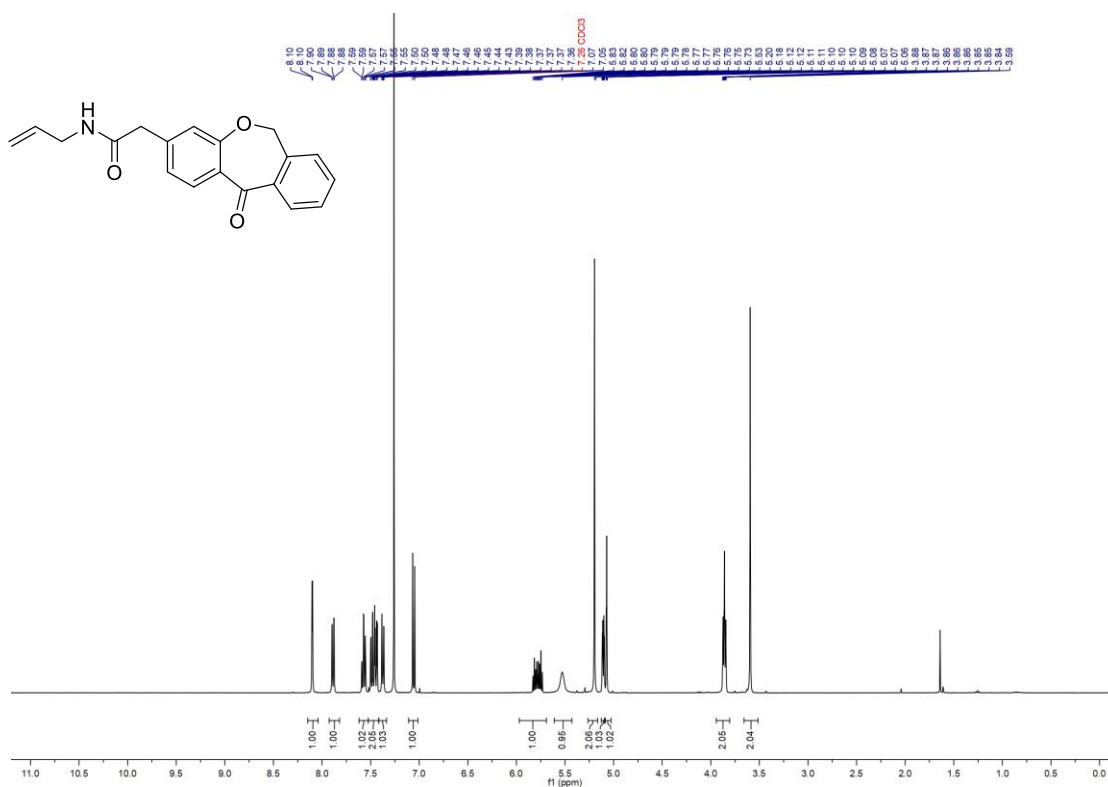

Figure S8.  $^{13}\text{C}$  NMR spectra (100 MHz, Chloroform- $d$ ) of *N*-Allyl-2-(11-oxo-6,11-dihydrodibenzo[*b,e*]oxepin-3-yl)acetamide (1f).

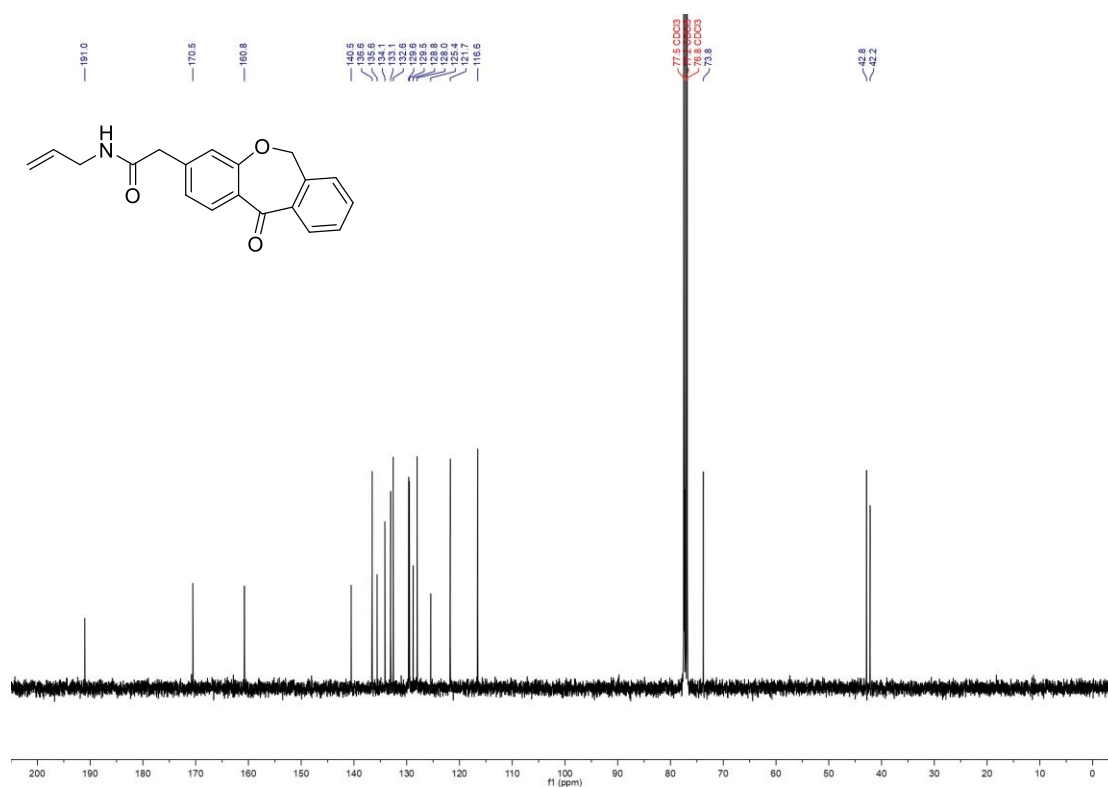



Figure S11.  $^1\text{H}$  NMR spectra (400 MHz, Chloroform- $d$ ) of 3-(Pyridin-3-yl)-1,4,2-dioxazol-5-one (2r).

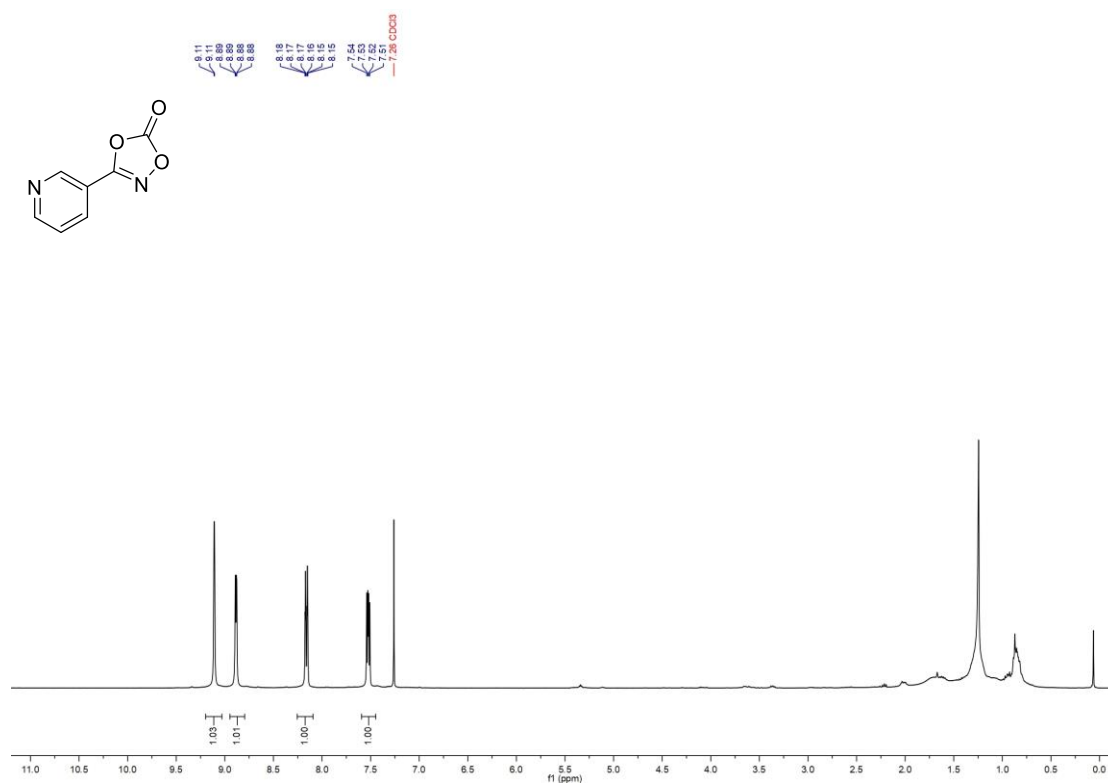

Figure S12.  $^{13}\text{C}$  NMR spectra (100 MHz, Chloroform- $d$ ) of 3-(Pyridin-3-yl)-1,4,2-dioxazol-5-one (2r).

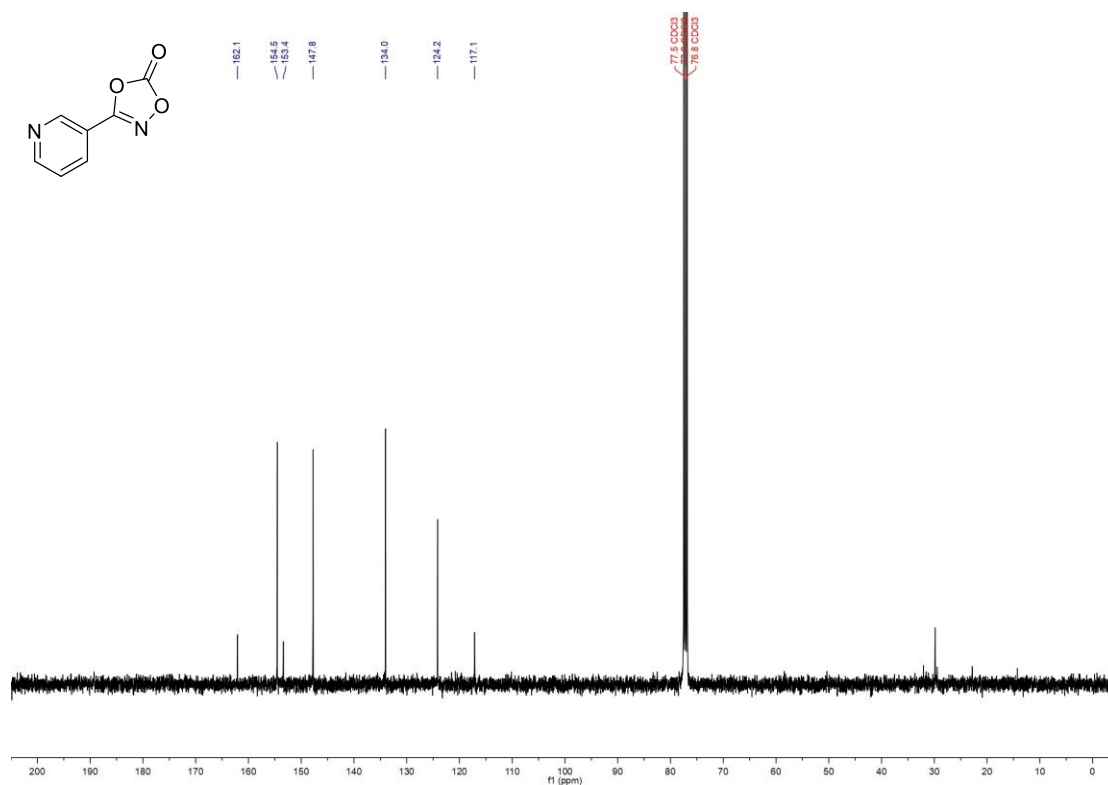

Figure S13.  $^1\text{H}$  NMR spectra (400 MHz,  $\text{DMSO-}d_6$ ) of (*S*)-*N*-(2-Benzamidopropyl)-4-methoxybenzamide (3aa).

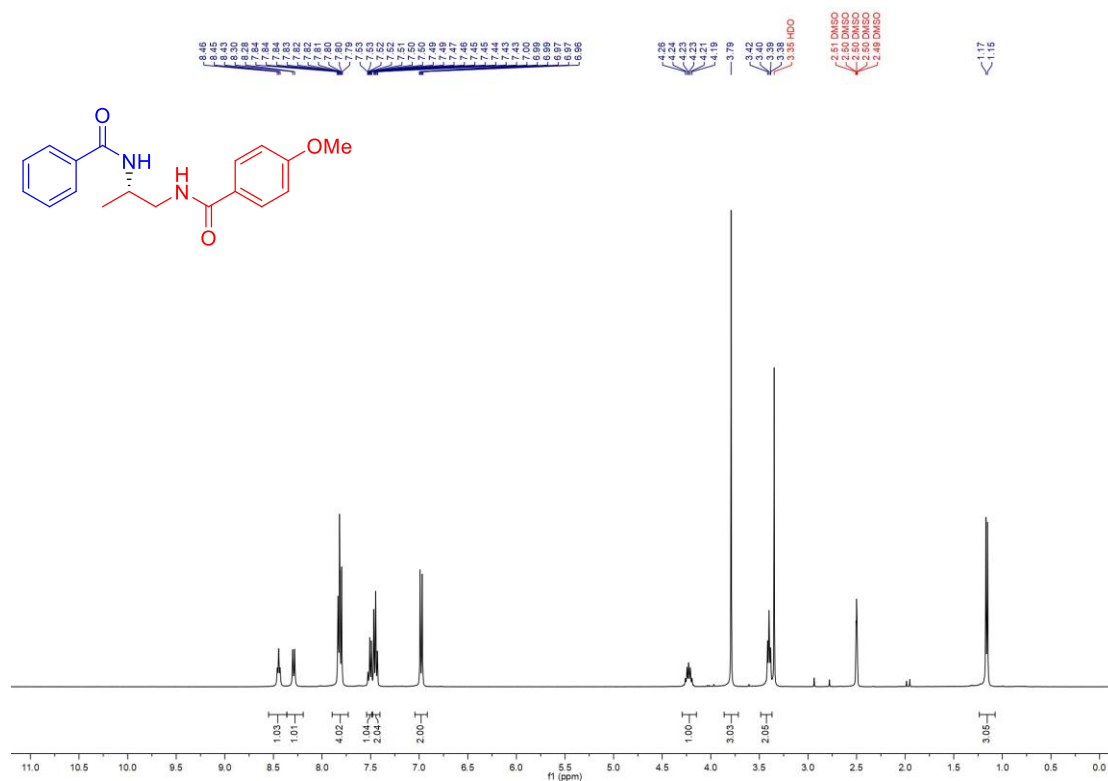

Figure S14.  $^{13}\text{C}$  NMR spectra (100 MHz,  $\text{DMSO-}d_6$ ) of (*S*)-*N*-(2-Benzamidopropyl)-4-methoxybenzamide (3aa).

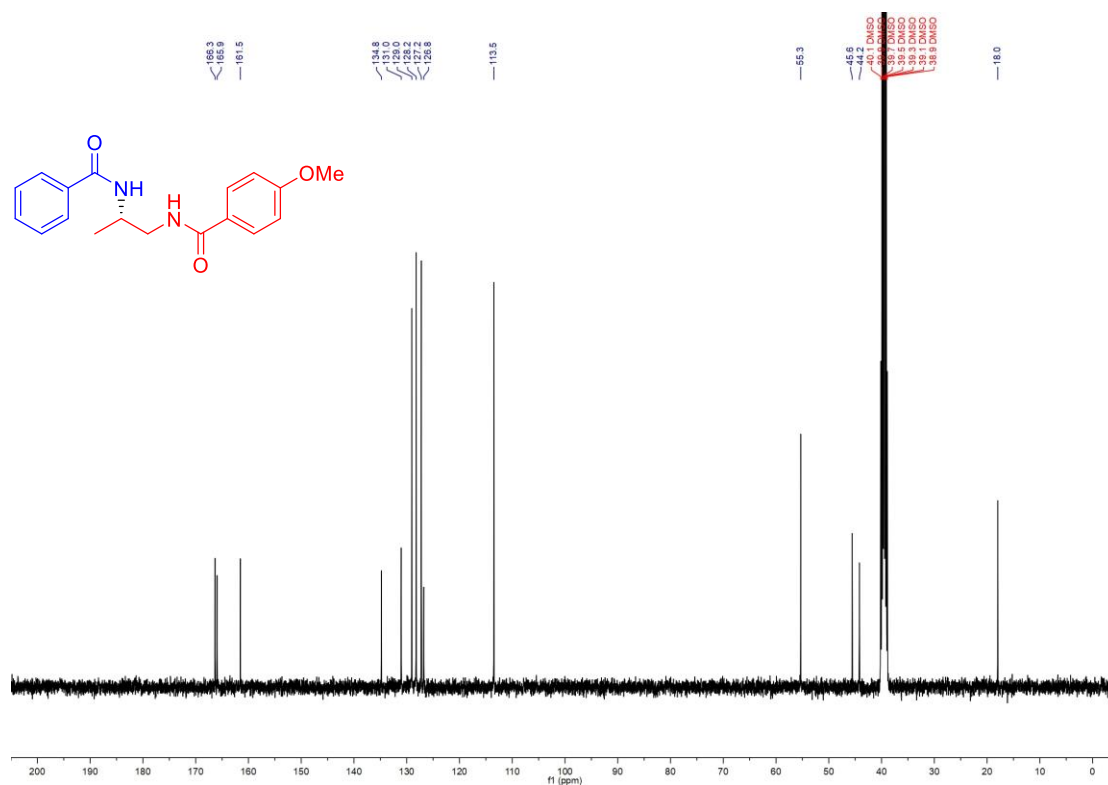

Figure S15.  $^1\text{H}$  NMR spectra (400 MHz,  $\text{DMSO-}d_6$ ) of (*S*)-*N*-(1-(4-Methoxybenzamido)prop-*an*-2-yl)-2-methylbenzamide (3ab).

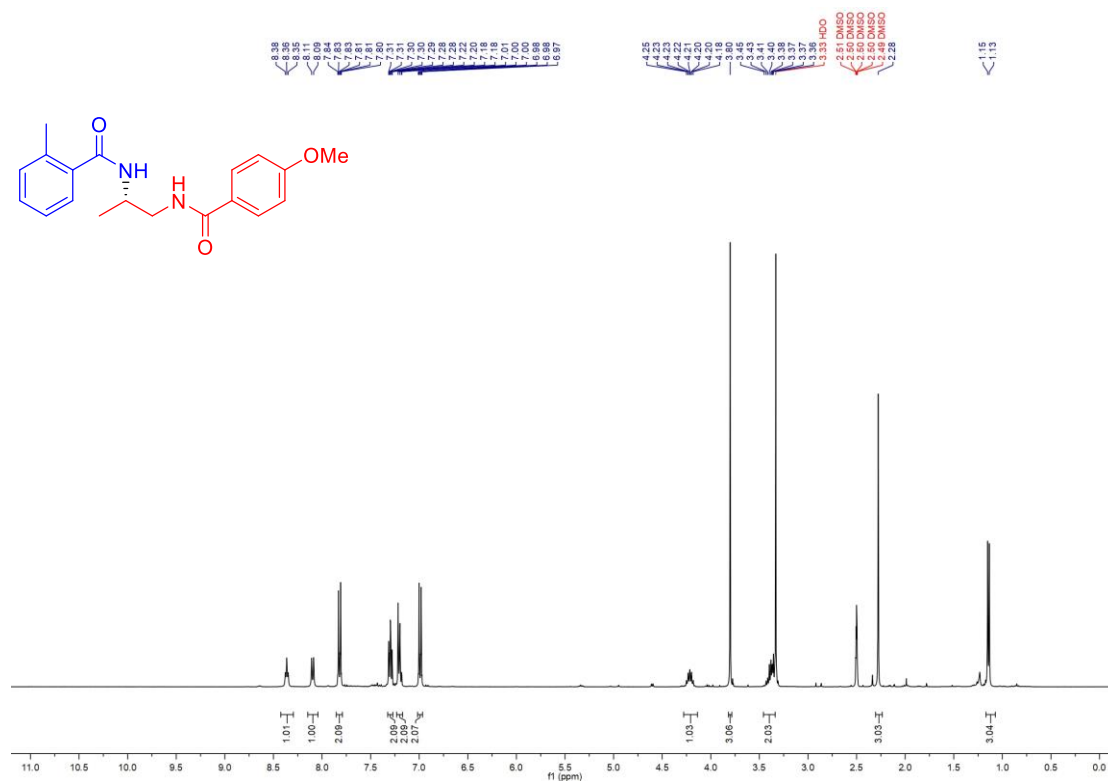

Figure S16.  $^{13}\text{C}$  NMR spectra (100 MHz,  $\text{DMSO-}d_6$ ) of (*S*)-*N*-(1-(4-Methoxybenzamido)prop-*an*-2-yl)-2-methylbenzamide (3ab).

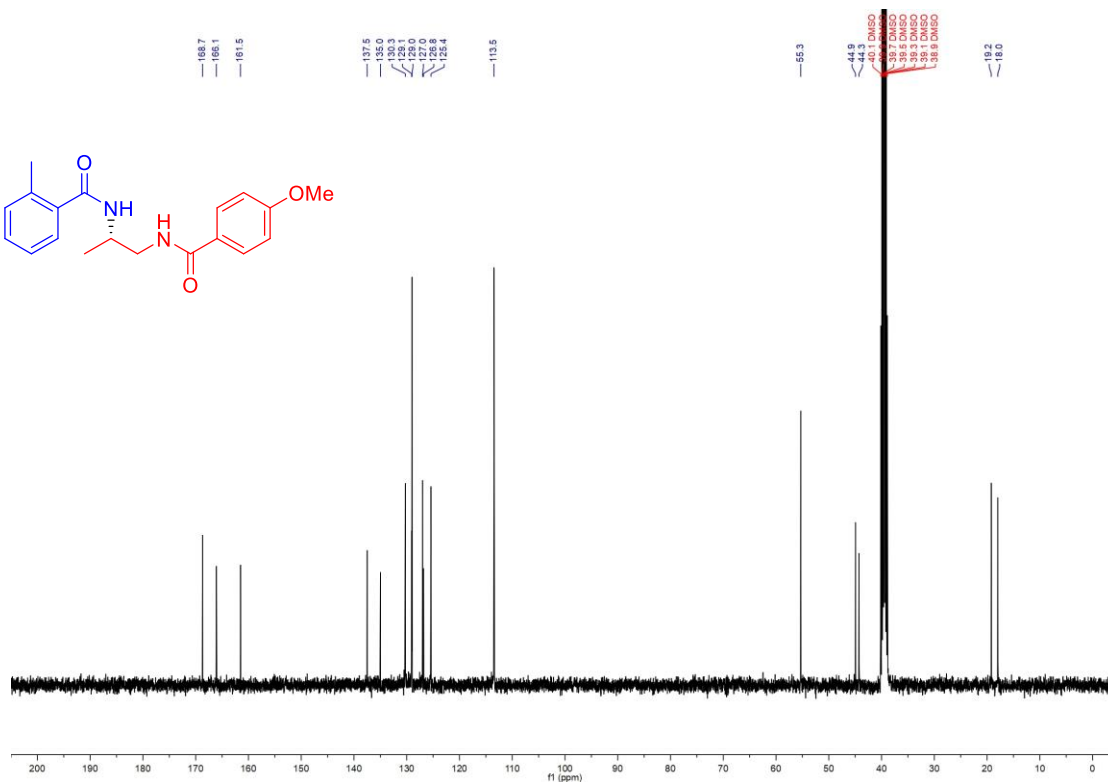

Figure S17.  $^1\text{H}$  NMR spectra (400 MHz,  $\text{DMSO-}d_6$ ) of (*S*)-2-Methoxy-*N*-(1-(4-methoxybenzamido)propan-2-yl)benzamide (3ac).

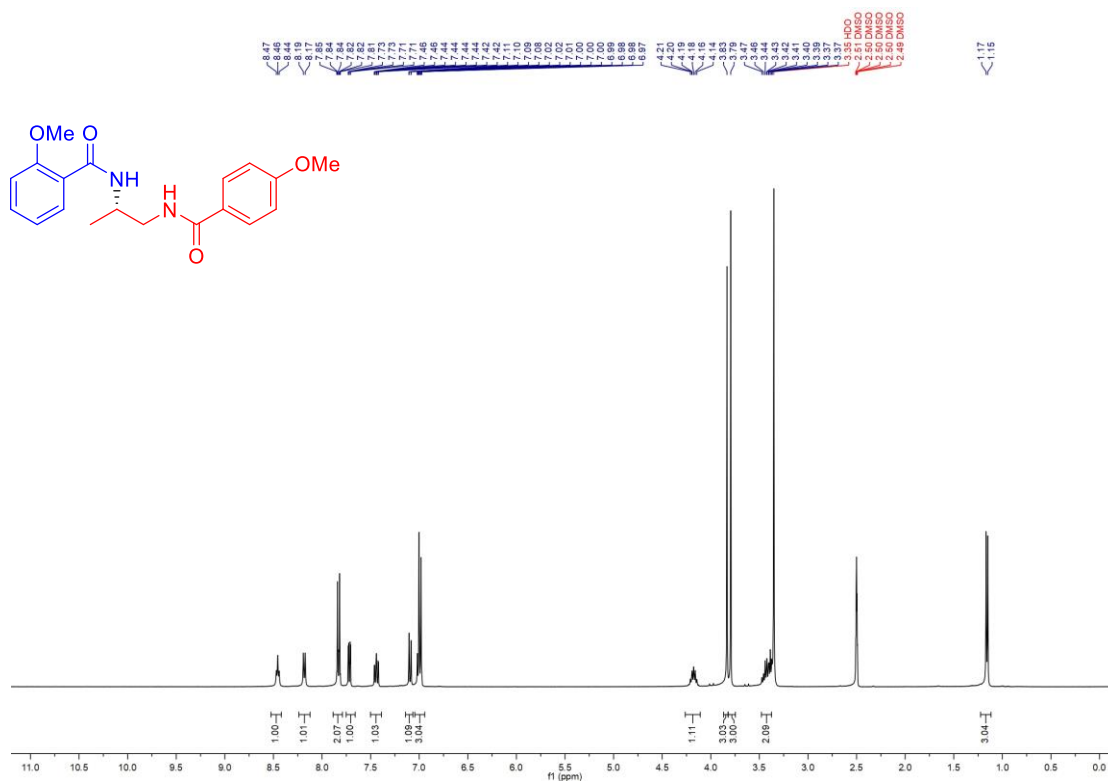

Figure S18.  $^{13}\text{C}$  NMR spectra (100 MHz,  $\text{DMSO-}d_6$ ) of (*S*)-2-Methoxy-*N*-(1-(4-methoxybenzamido)propan-2-yl)benzamide (3ac).

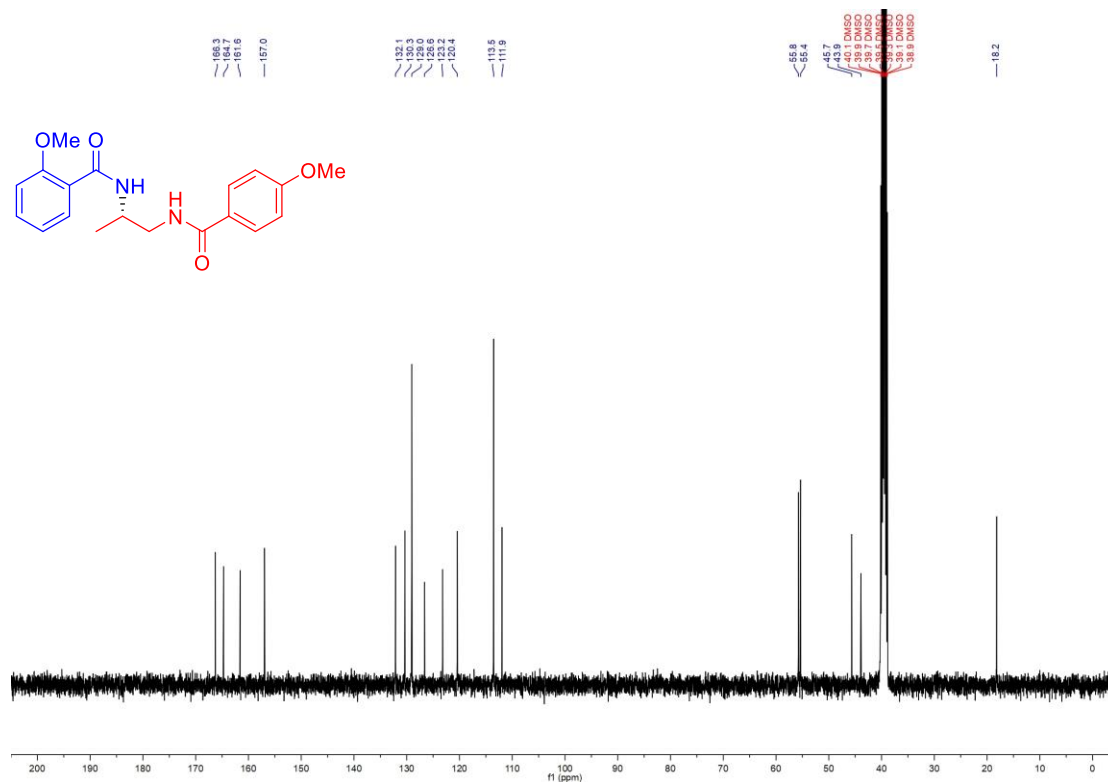

Figure S19.  $^1\text{H}$  NMR spectra (400 MHz,  $\text{DMSO-}d_6$ ) of (*S*)-*N*-(1-(4-Methoxybenzamido)prop-*an*-2-yl)-3-methylbenzamide (3ad).

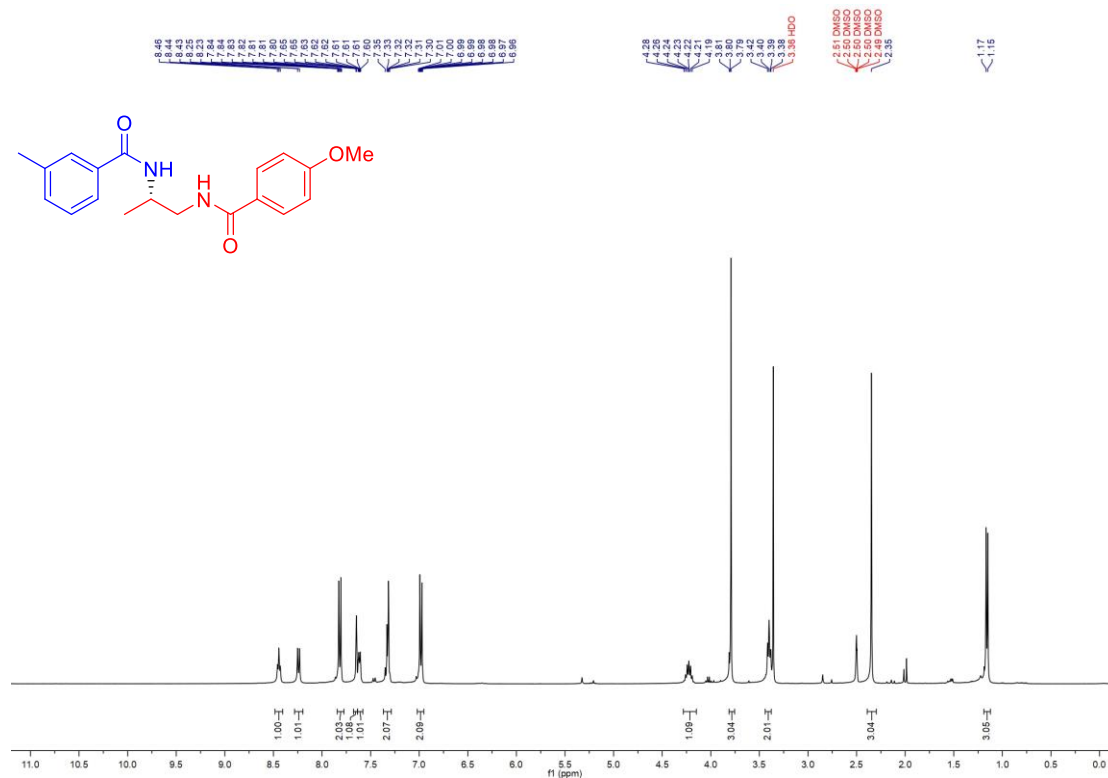

Figure S20.  $^{13}\text{C}$  NMR spectra (100 MHz,  $\text{DMSO-}d_6$ ) of (*S*)-*N*-(1-(4-Methoxybenzamido)prop-*an*-2-yl)-3-methylbenzamide (3ad).

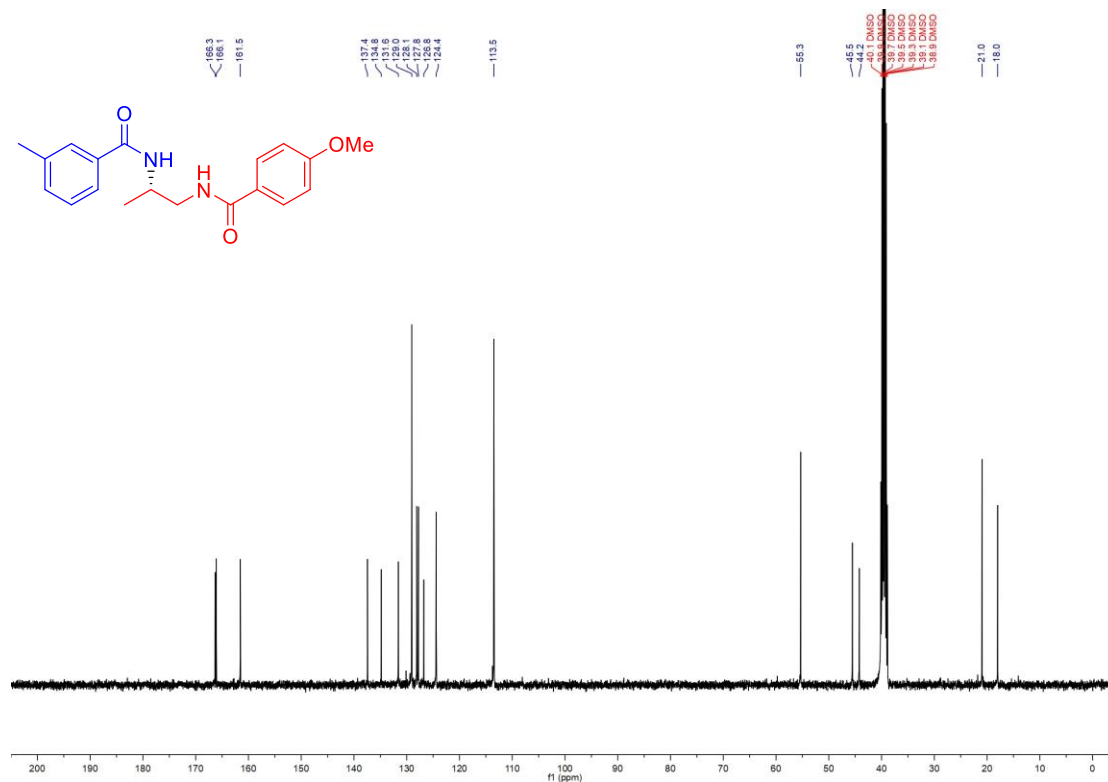

Figure S21.  $^1\text{H}$  NMR spectra (400 MHz,  $\text{DMSO-}d_6$ ) of (*S*)-3-Methoxy-*N*-(1-(4-methoxybenzamido)propan-2-yl)benzamide (3ae).

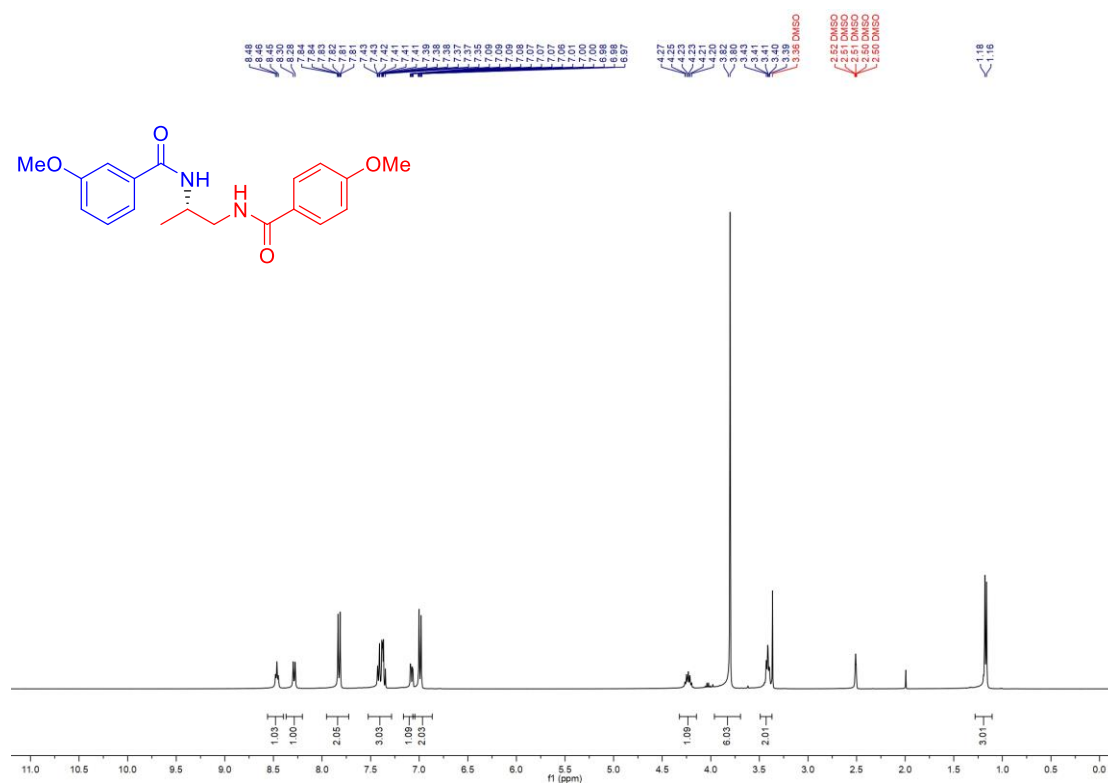

Figure S22.  $^{13}\text{C}$  NMR spectra (100 MHz,  $\text{DMSO-}d_6$ ) of (*S*)-3-Methoxy-*N*-(1-(4-methoxybenzamido)propan-2-yl)benzamide (3ae).

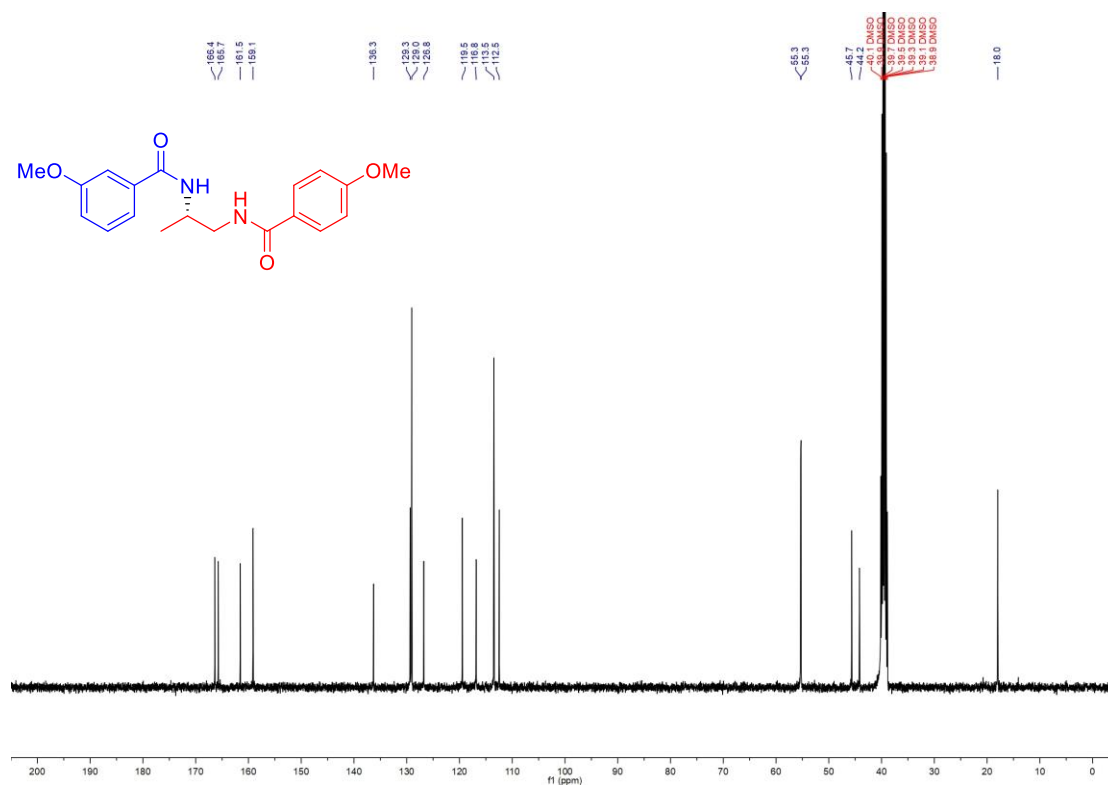

Figure S23.  $^1\text{H}$  NMR spectra (400 MHz,  $\text{DMSO-}d_6$ ) of (*S*)-4-(*tert*-Butyl)-*N*-(1-(4-methoxybenzamido)propan-2-yl)benzamide (3af).

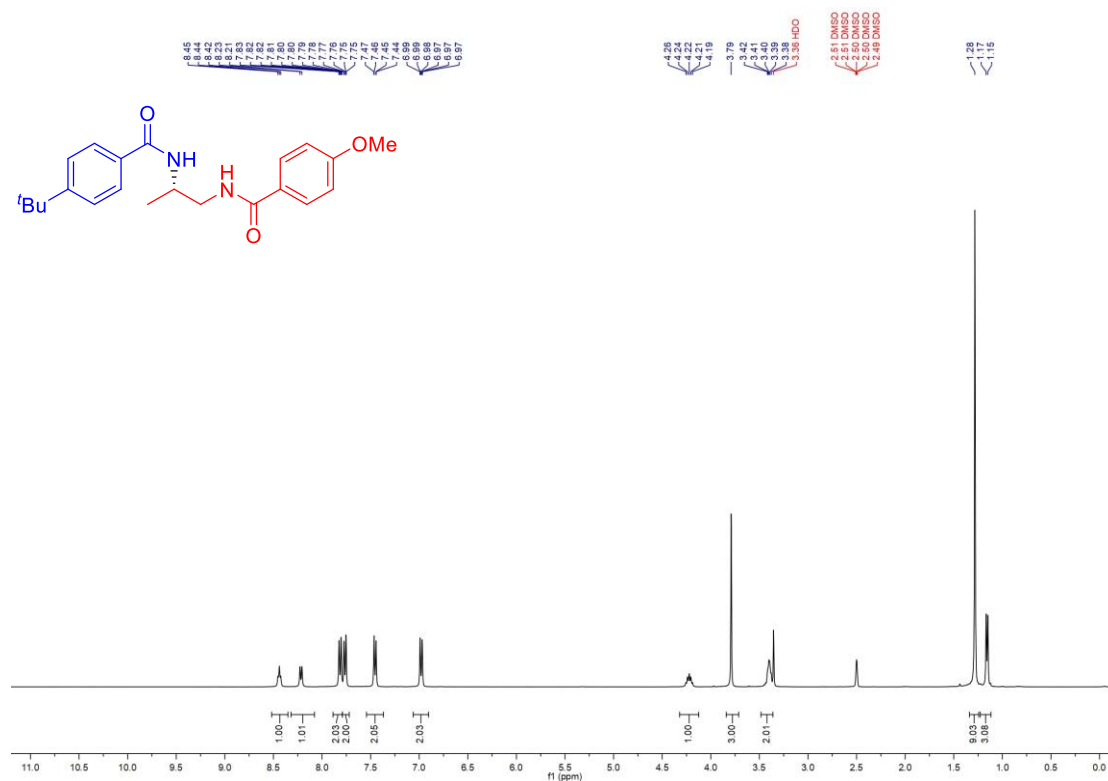

Figure S24.  $^{13}\text{C}$  NMR spectra (100 MHz,  $\text{DMSO-}d_6$ ) of (*S*)-4-(*tert*-Butyl)-*N*-(1-(4-methoxybenzamido)propan-2-yl)benzamide (3af).

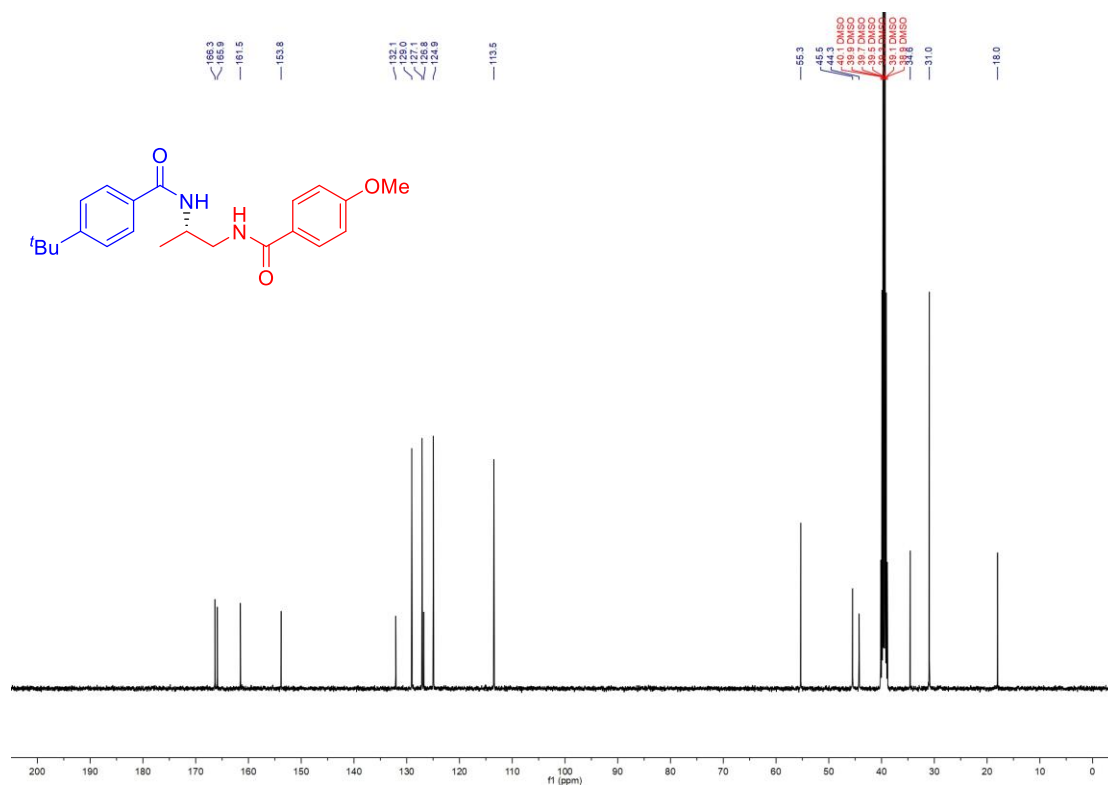



Figure S27.  $^1\text{H}$  NMR spectra (400 MHz,  $\text{DMSO-}d_6$ ) of (*S*)-4-Fluoro-*N*-(1-(4-methoxybenzamido)propan-2-yl)benzamide (3ah).

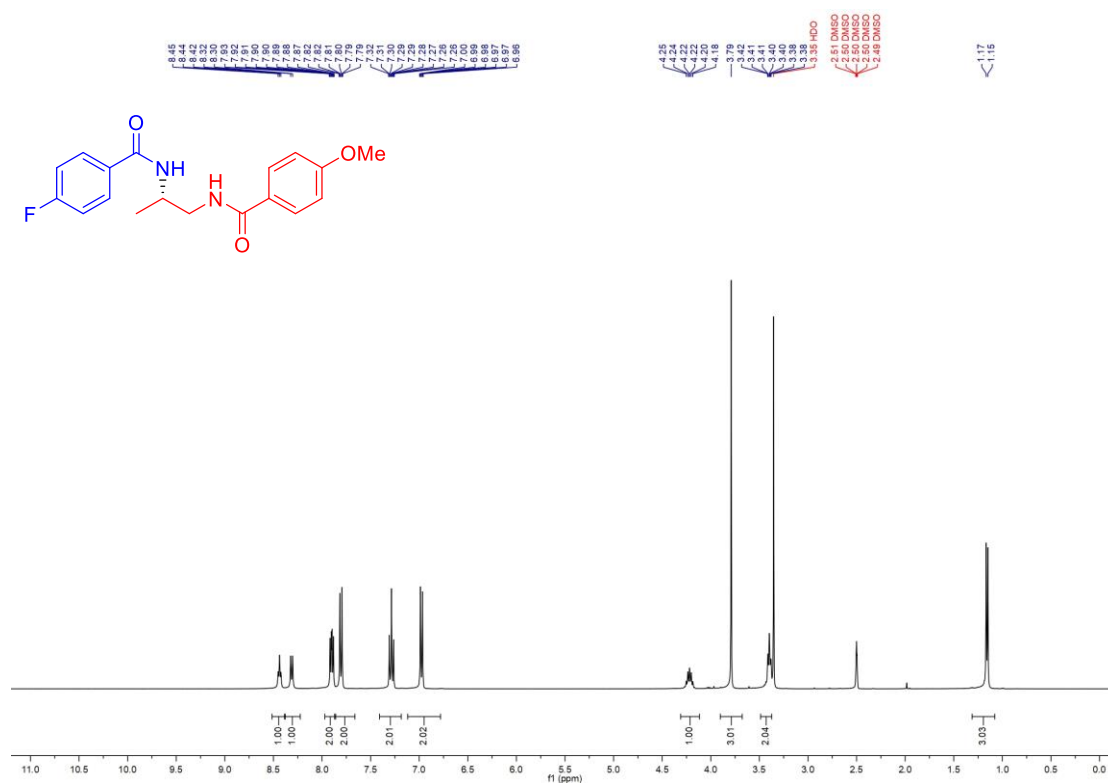

Figure S28.  $^{13}\text{C}$  NMR spectra (100 MHz,  $\text{DMSO-}d_6$ ) of (*S*)-4-Fluoro-*N*-(1-(4-methoxybenzamido)propan-2-yl)benzamide (3ah).

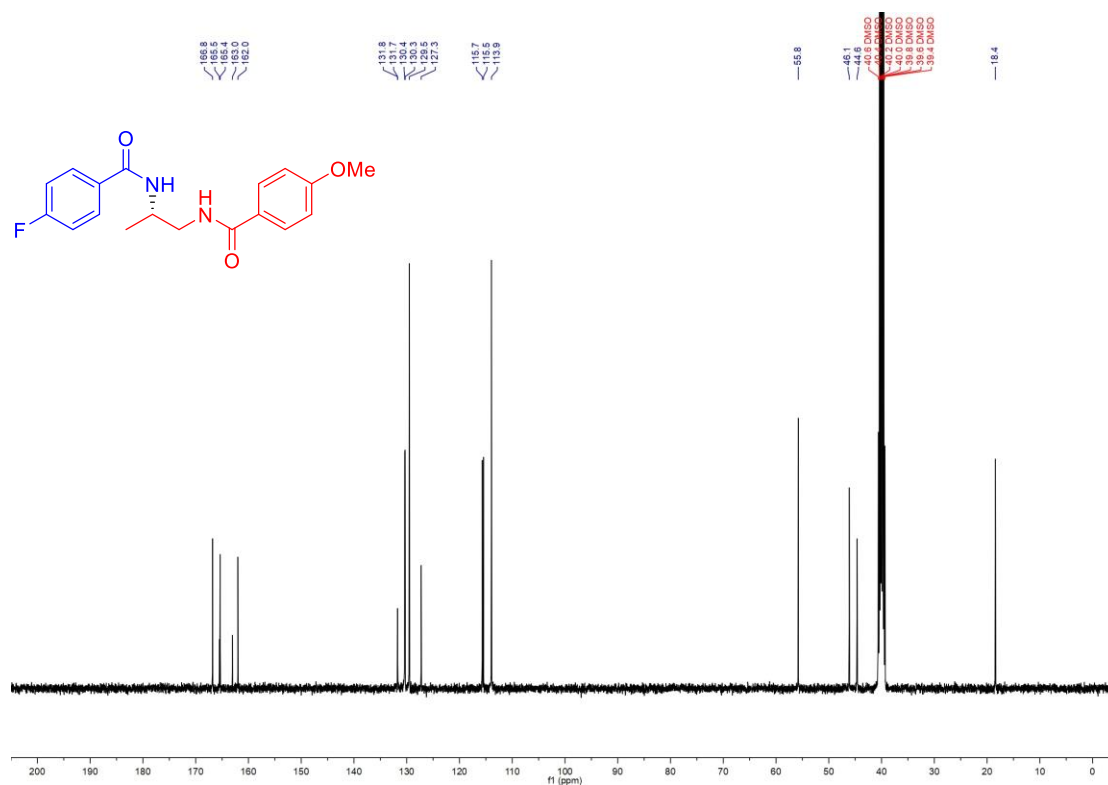

**Figure S29.**  $^{19}\text{F}$  NMR spectra (376 MHz,  $\text{DMSO-}d_6$ ) of (*S*)-4-Fluoro-*N*-(1-(4-methoxybenzamido)propan-2-yl)benzamide (3ah).

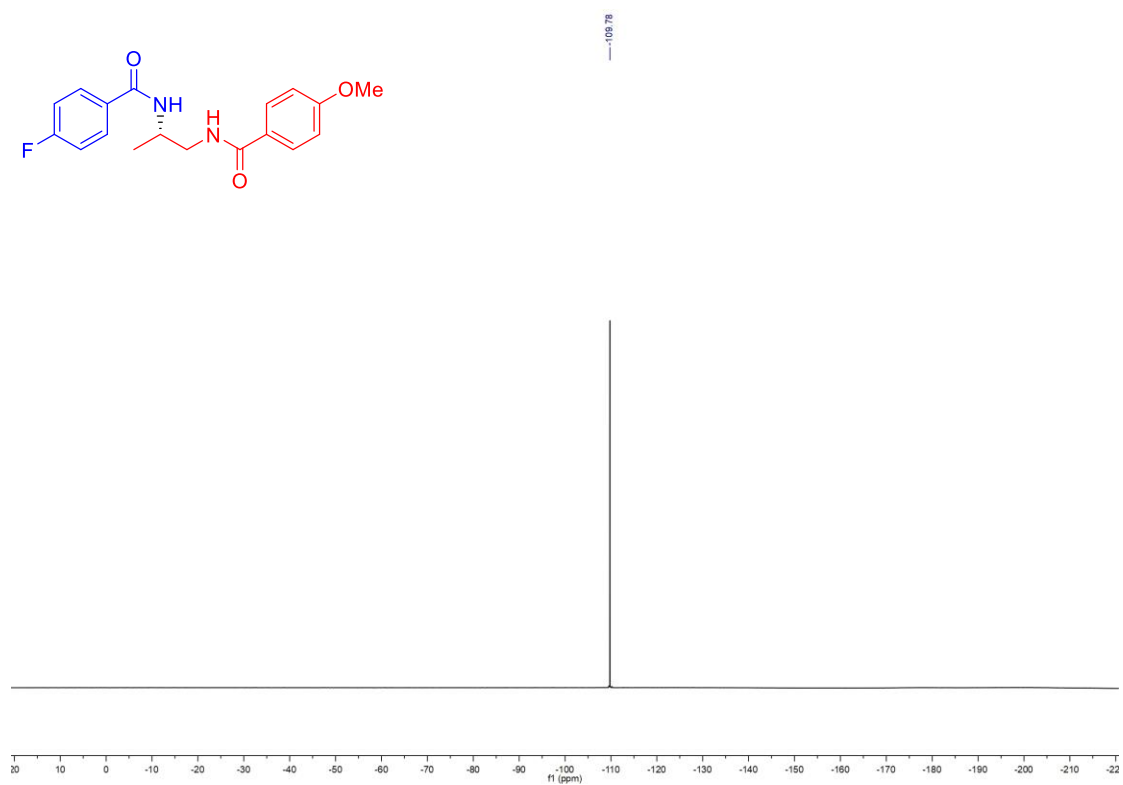

Figure S30.  $^1\text{H}$  NMR spectra (400 MHz,  $\text{DMSO-}d_6$ ) of (*S*)-4-Chloro-*N*-(1-(4-methoxybenzamido)propan-2-yl)benzamide (3ai).

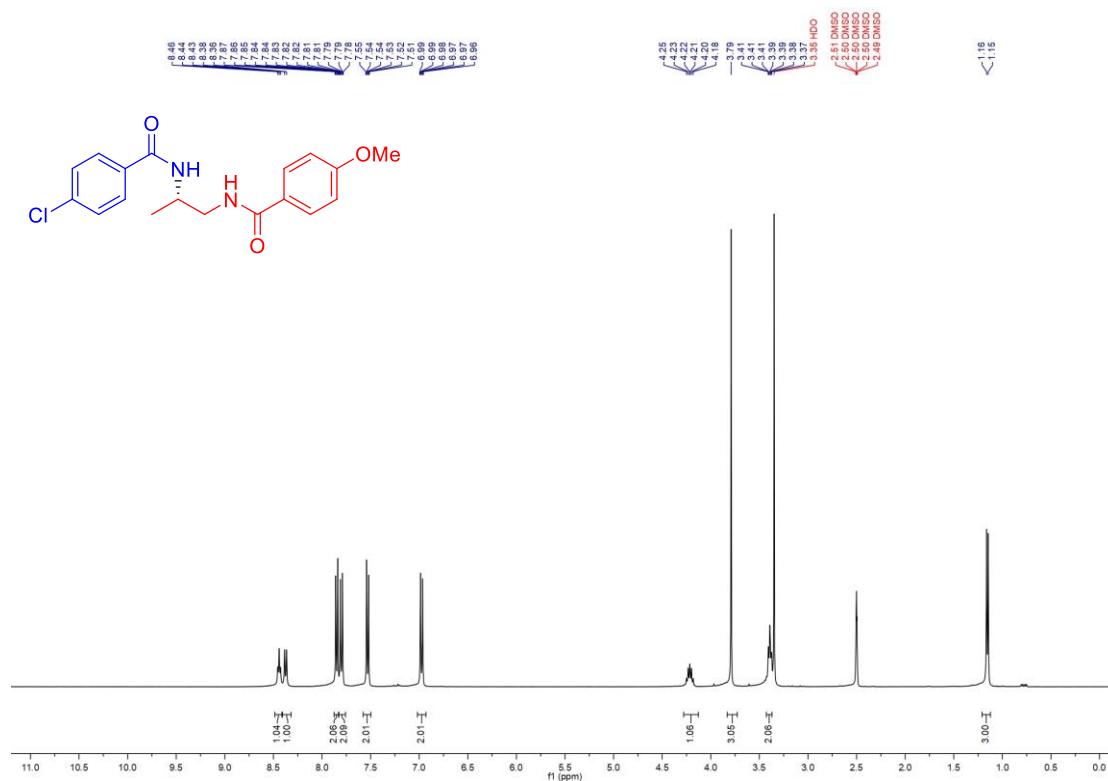

Figure S31.  $^{13}\text{C}$  NMR spectra (100 MHz,  $\text{DMSO-}d_6$ ) of (*S*)-4-Chloro-*N*-(1-(4-methoxybenzamido)propan-2-yl)benzamide (3ai).

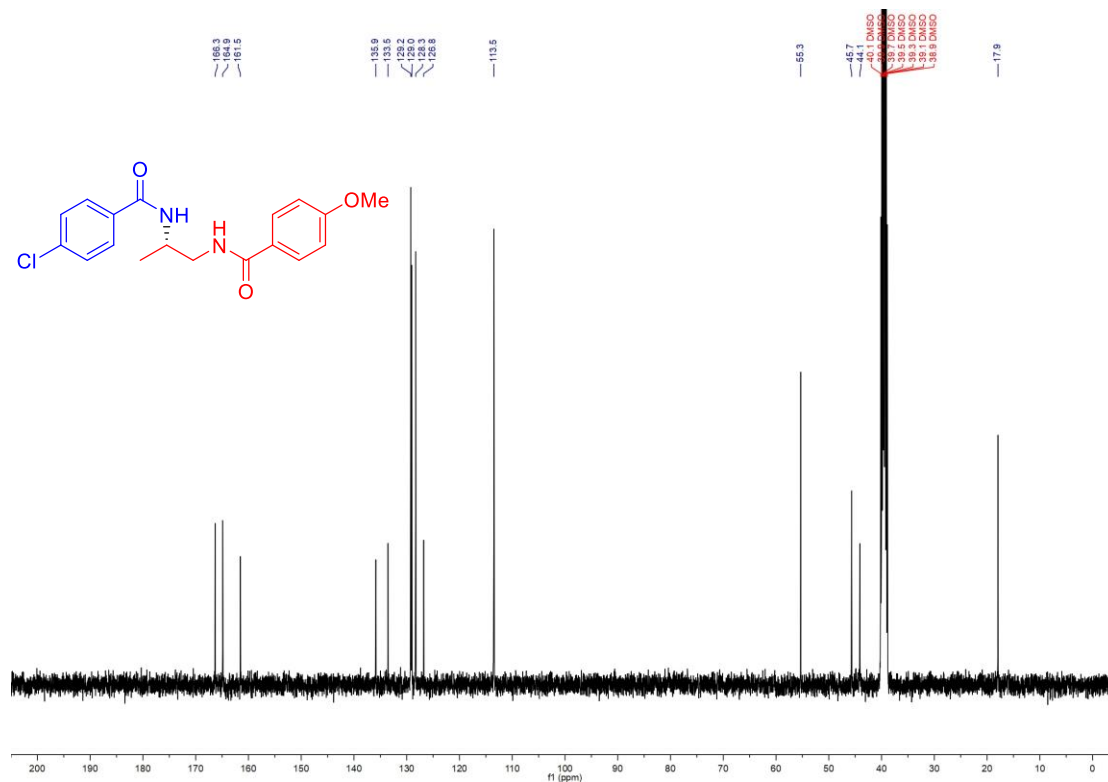

Figure S32.  $^1\text{H}$  NMR spectra (400 MHz,  $\text{DMSO-}d_6$ ) of (*S*)-4-Bromo-*N*-(1-(4-methoxybenzamido)propan-2-yl)benzamide (3aj).

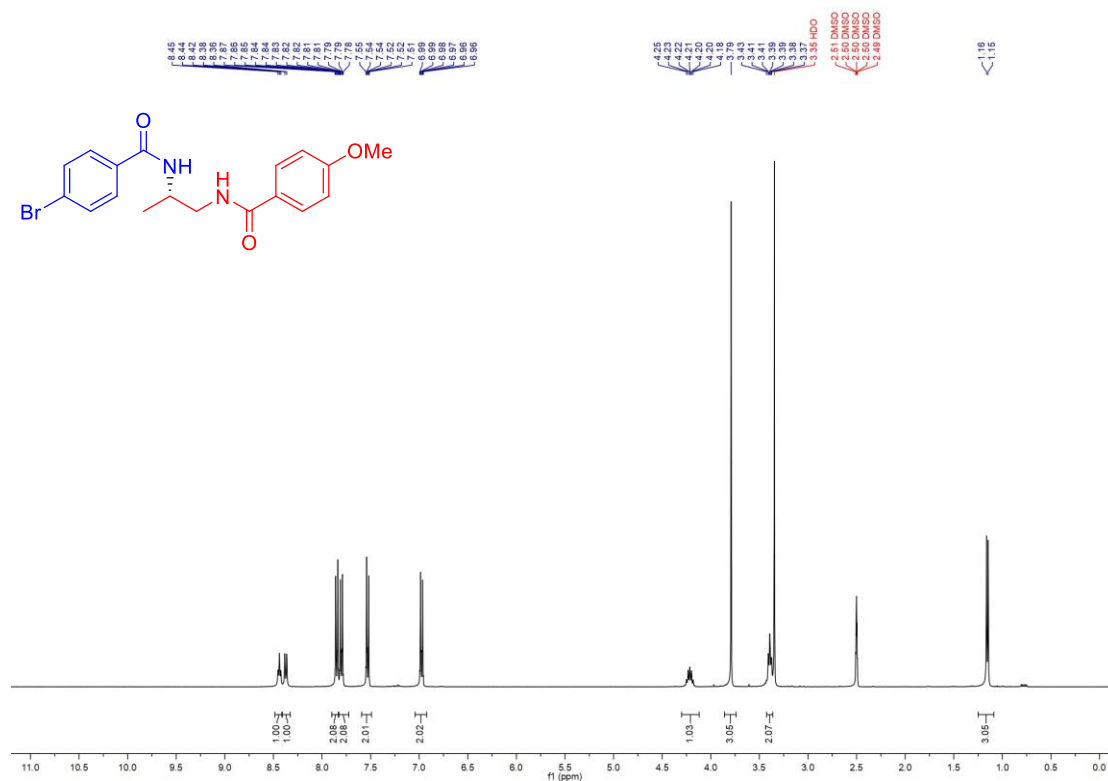

Figure S33.  $^{13}\text{C}$  NMR spectra (100 MHz,  $\text{DMSO-}d_6$ ) of (*S*)-4-Bromo-*N*-(1-(4-methoxybenzamido)propan-2-yl)benzamide (3aj).

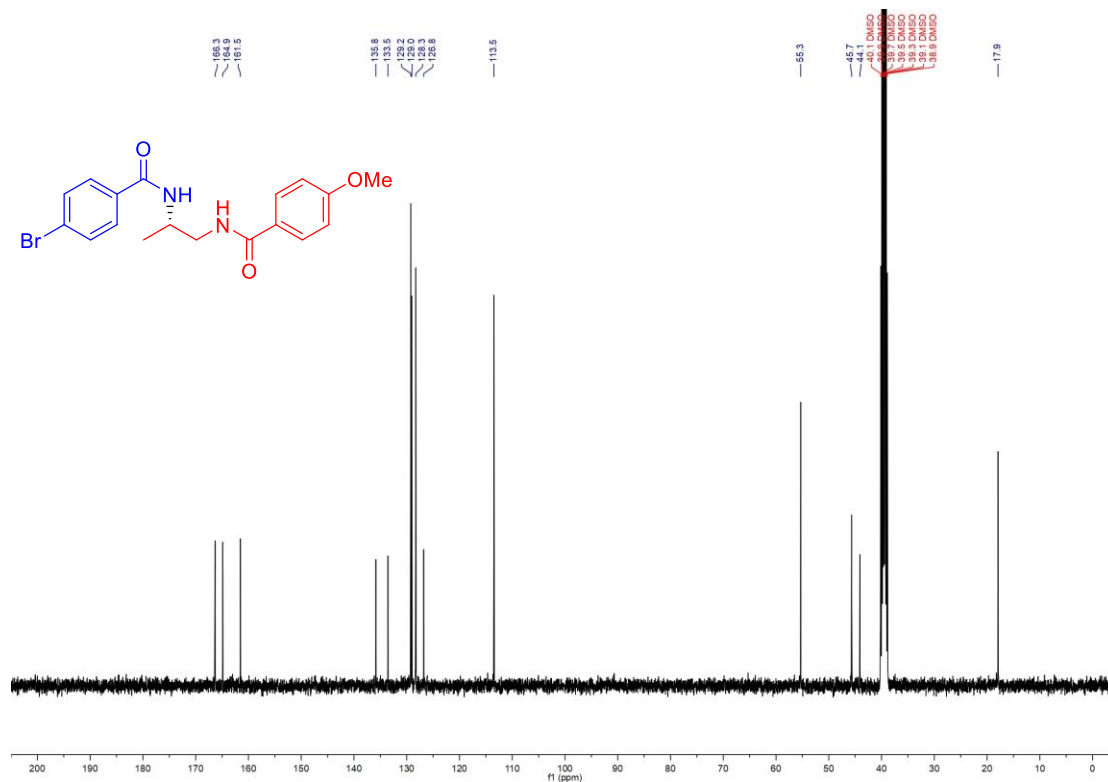

Figure S34.  $^1\text{H}$  NMR spectra (400 MHz,  $\text{DMSO-}d_6$ ) of (*S*)-4-Methoxy-*N*-(2-(4-(trifluoromethoxy)benzamido)propyl)benzamide (3ak).

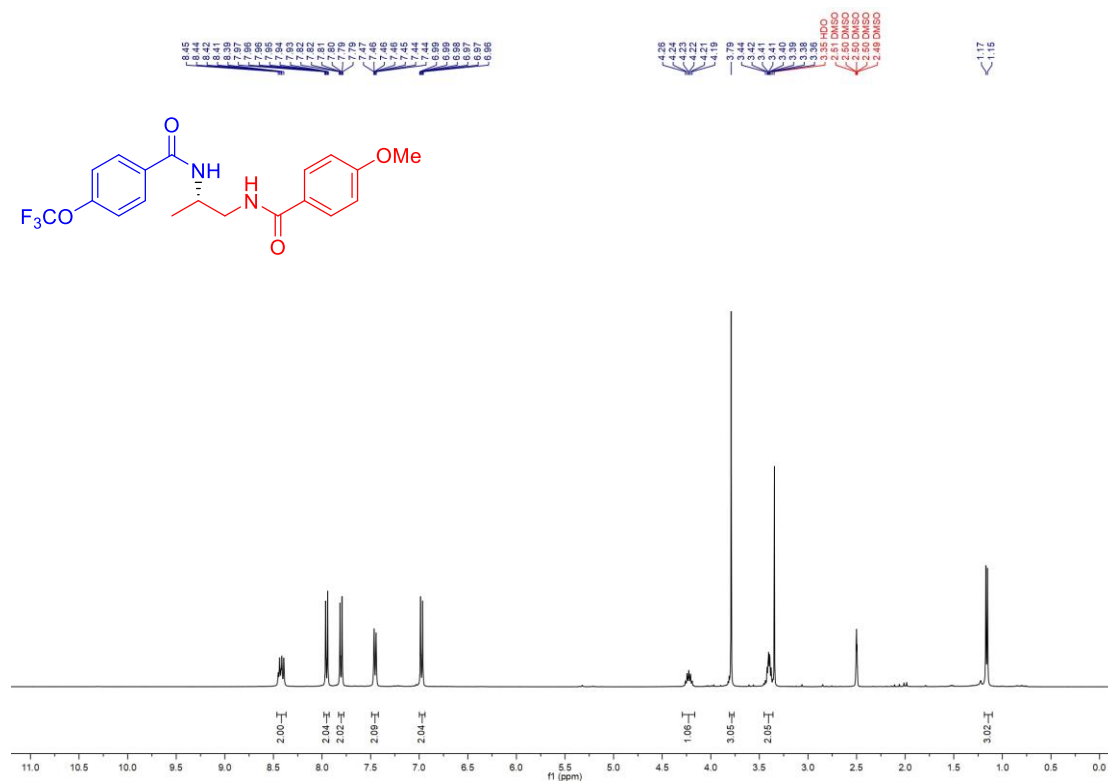

Figure S35.  $^{13}\text{C}$  NMR spectra (100 MHz,  $\text{DMSO-}d_6$ ) of (*S*)-4-Methoxy-*N*-(2-(4-(trifluoromethoxy)benzamido)propyl)benzamide (3ak).

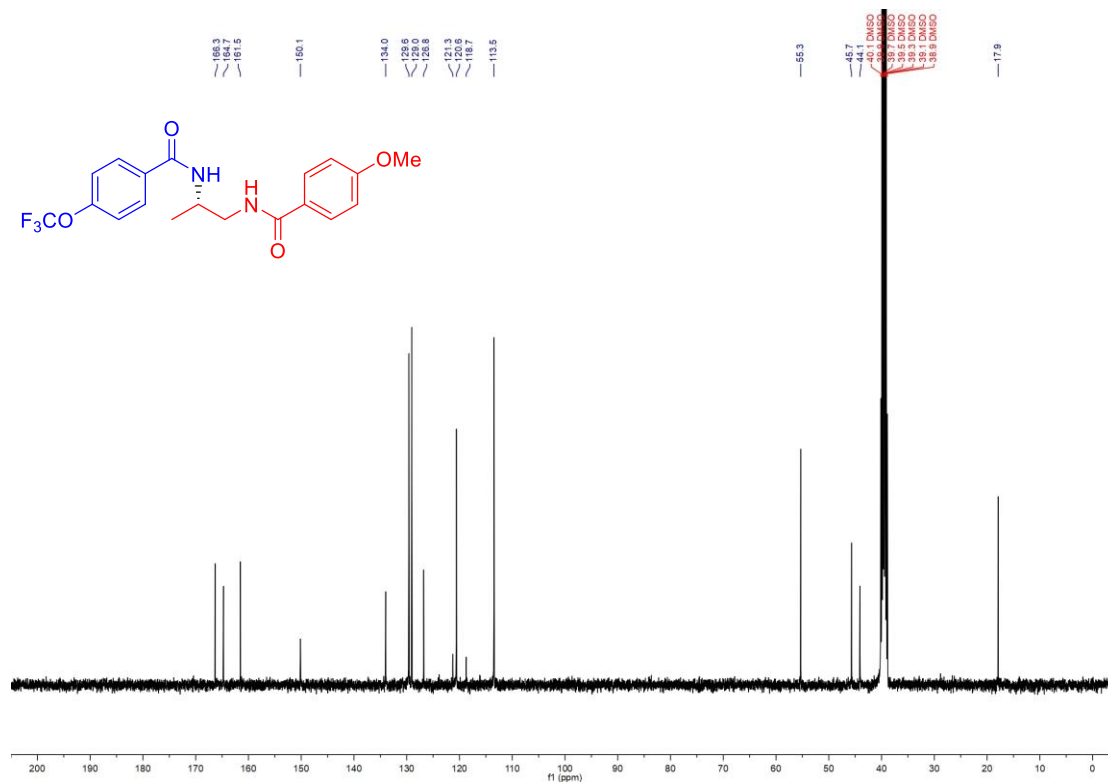

**Figure S36.**  $^{19}\text{F}$  NMR spectra (376 MHz,  $\text{DMSO-}d_6$ ) of (*S*)-4-Methoxy-*N*-(2-(4-(trifluoromethoxy)benzamido)propyl)benzamide (3ak).

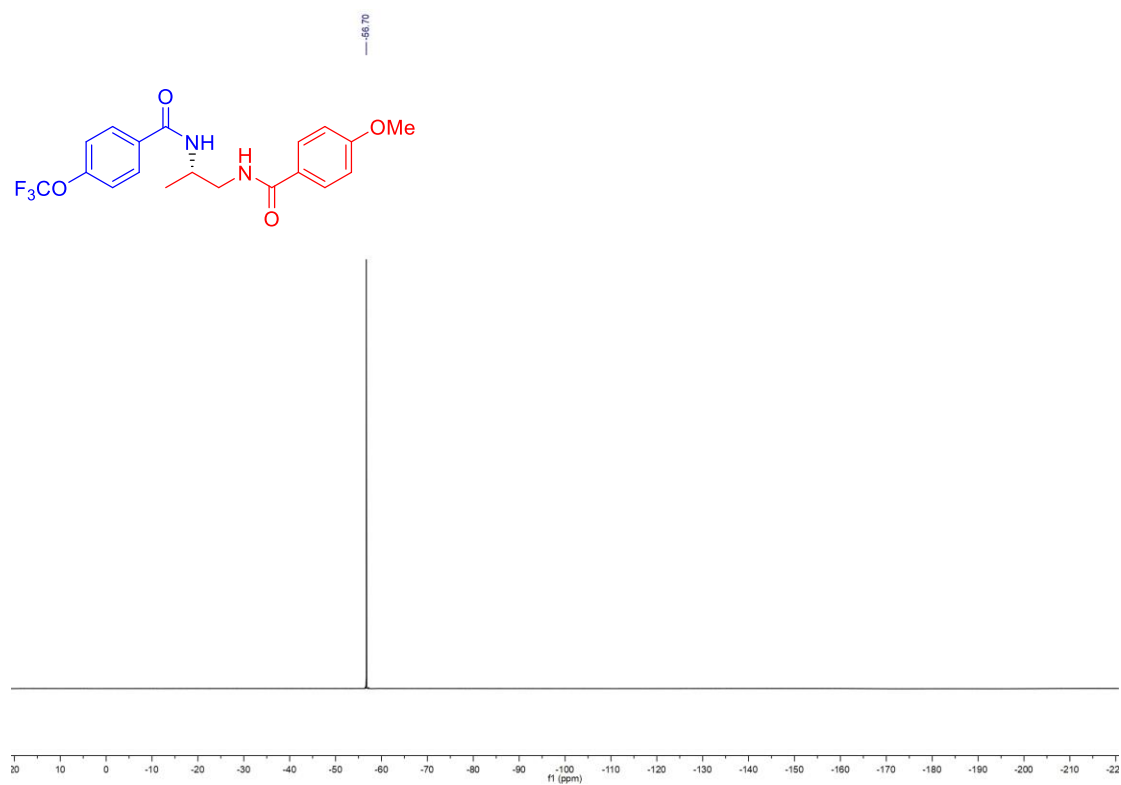

Figure S37.  $^1\text{H}$  NMR spectra (400 MHz,  $\text{DMSO-}d_6$ ) of (*S*)-*N*-(1-(4-Methoxybenzamido)prop-2-yl)thiophene-2-carboxamide (3a).

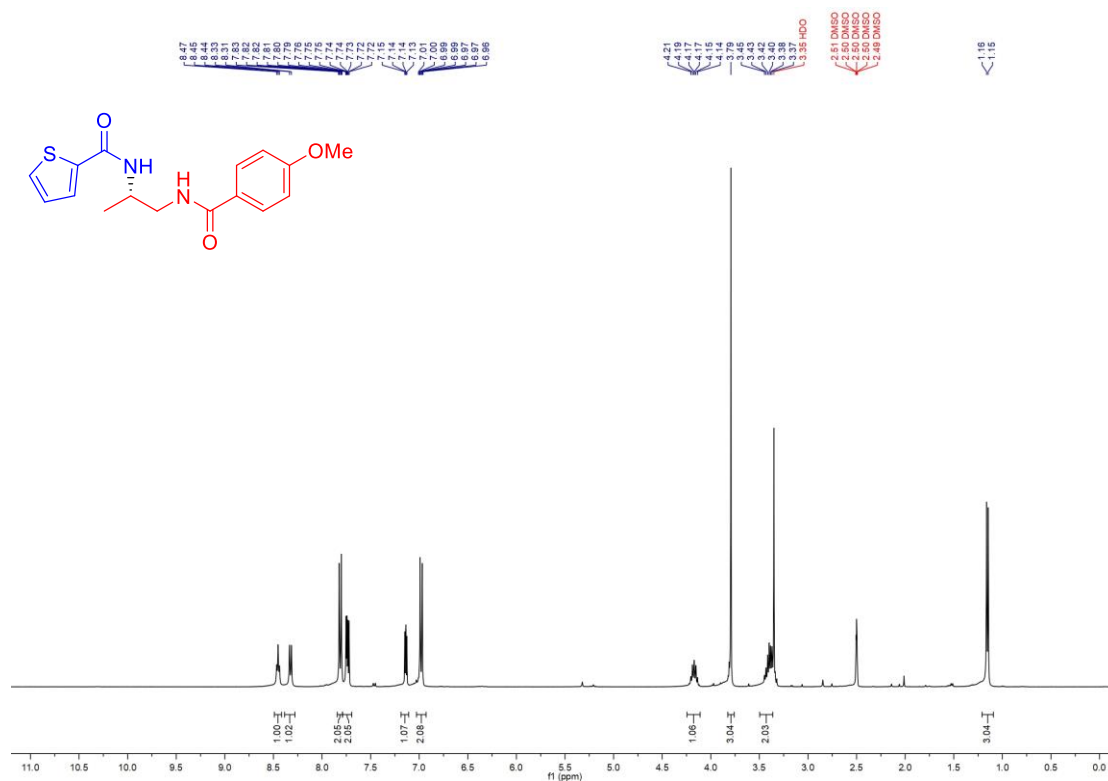

Figure S38.  $^{13}\text{C}$  NMR spectra (100 MHz,  $\text{DMSO-}d_6$ ) of (*S*)-*N*-(1-(4-Methoxybenzamido)prop-2-yl)thiophene-2-carboxamide (3a).

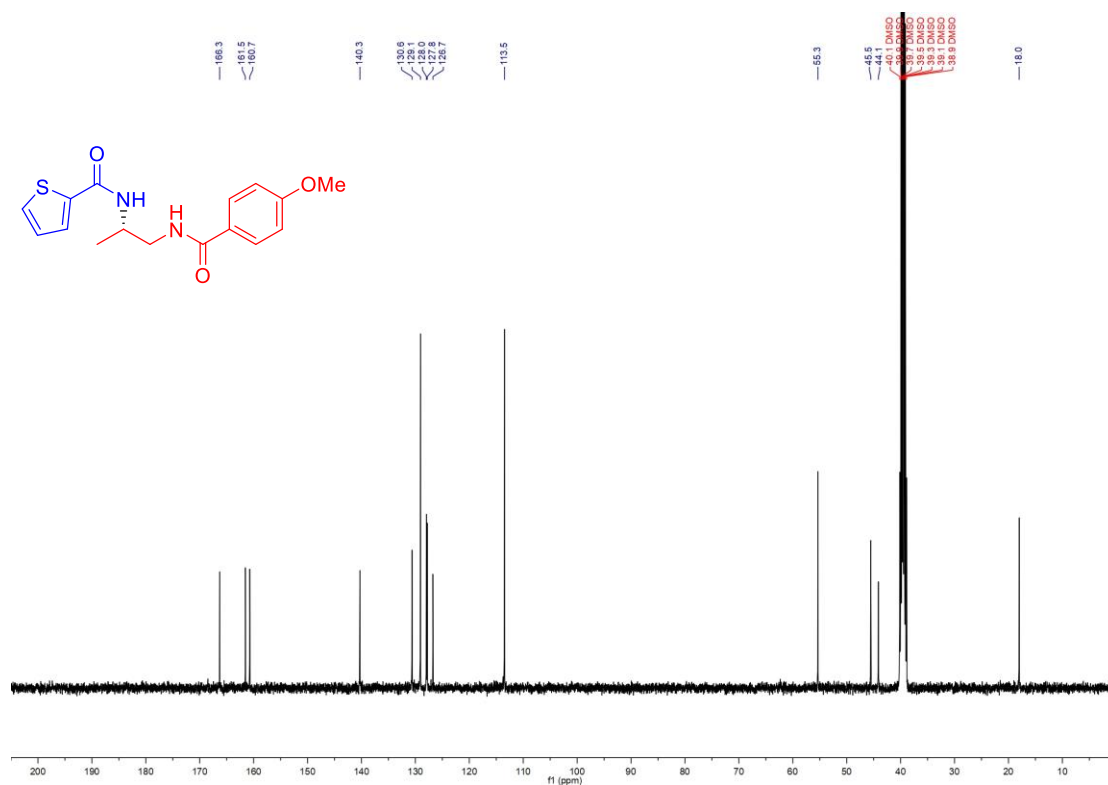

Figure S39.  $^1\text{H}$  NMR spectra (600 MHz,  $\text{DMSO-}d_6$ ) of *N*-(3*S*-3-Benzamidobutan-2-yl)-4-methoxybenzamide (3ba) (Major diastereoisomer).

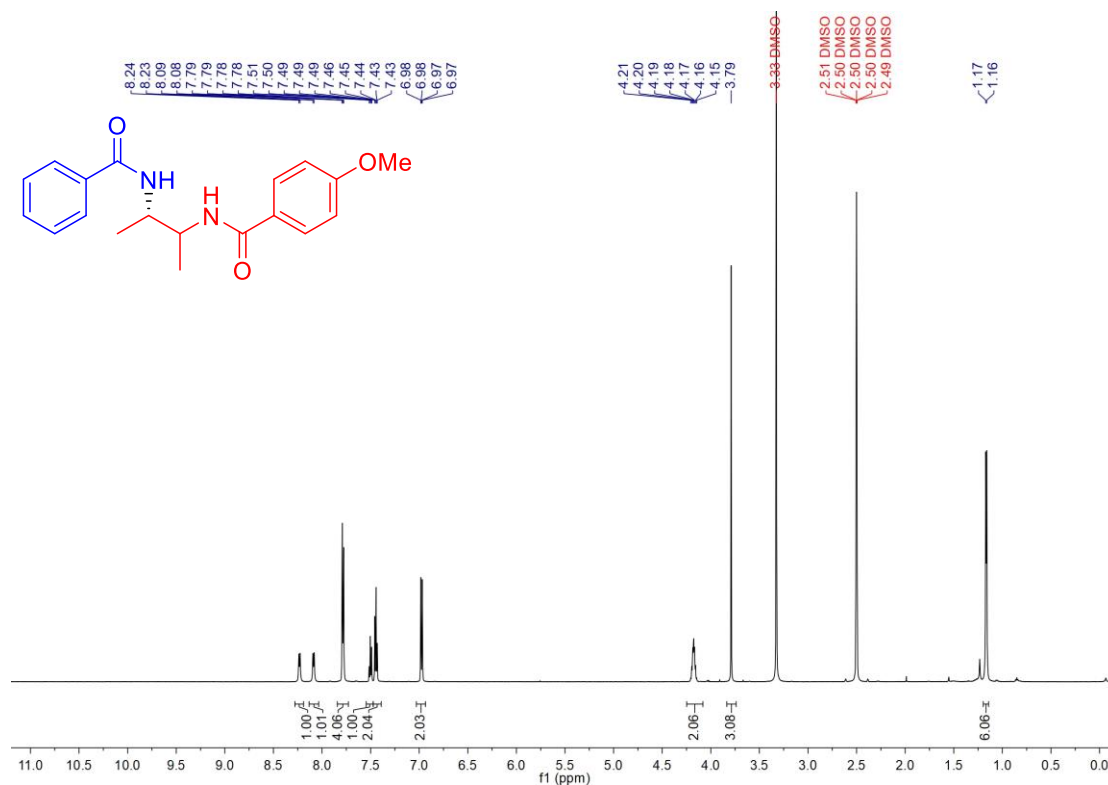

Figure S40.  $^{13}\text{C}$  NMR spectra (150 MHz,  $\text{DMSO-}d_6$ ) of *N*-((3*S*)-3-Benzamidobutan-2-yl)-4-methoxybenzamide (3ba) (Major diastereoisomer).

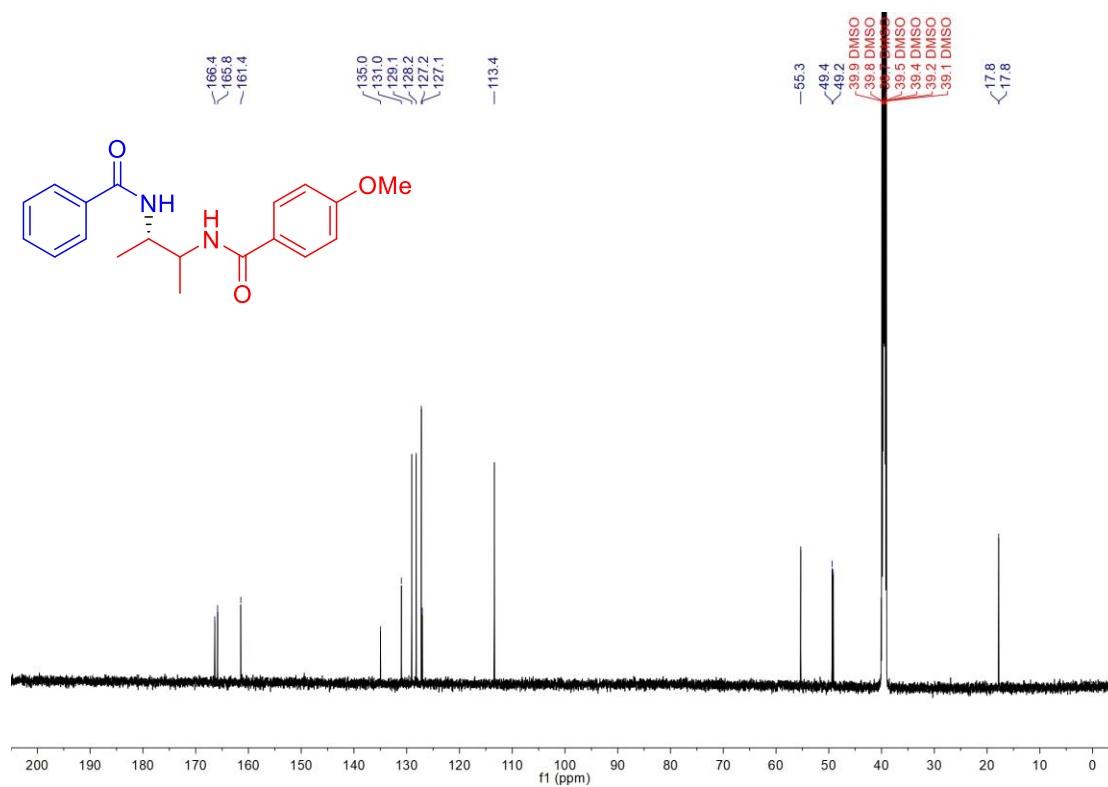

Figure S41.  $^1\text{H}$  NMR spectra (600 MHz,  $\text{DMSO-}d_6$ ) of *N*-((3*S*)-3-Benzamidobutan-2-yl)-4-methoxybenzamide (3ba) (Minor diastereoisomer).

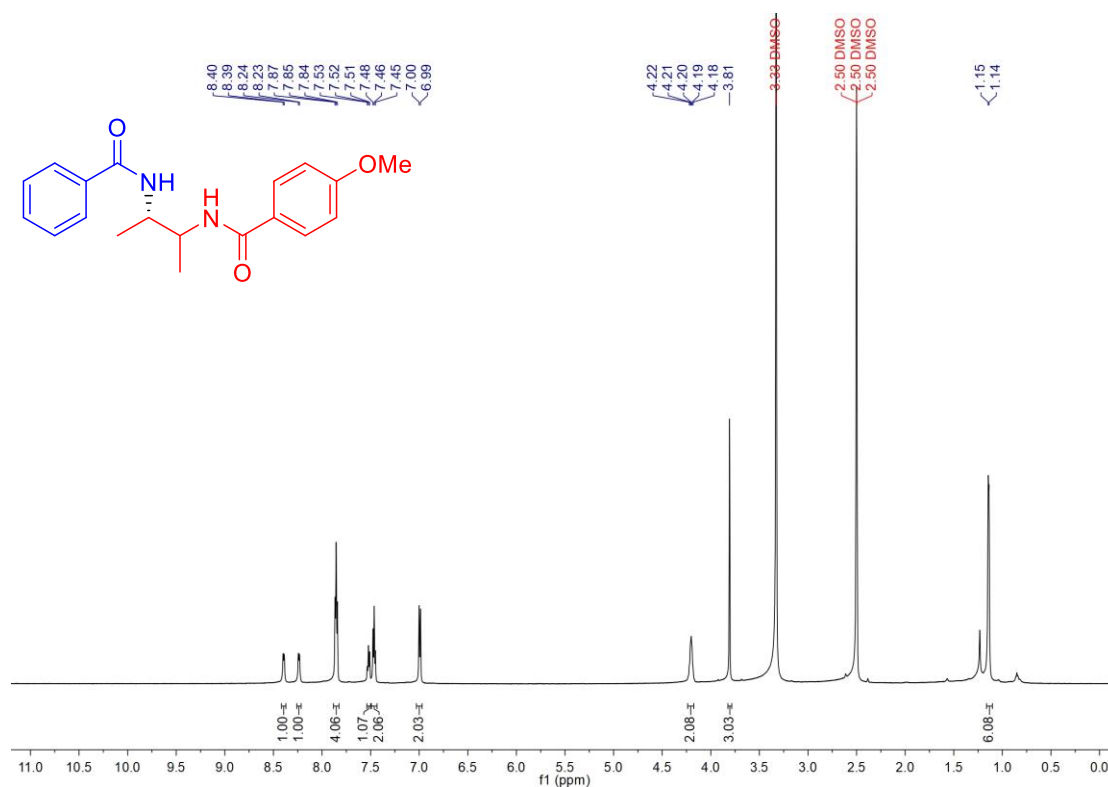

Figure S42.  $^{13}\text{C}$  NMR spectra (150 MHz,  $\text{DMSO-}d_6$ ) of *N*-((3*S*)-3-Benzamidobutan-2-yl)-4-methoxybenzamide (3ba) (Minor diastereoisomer).

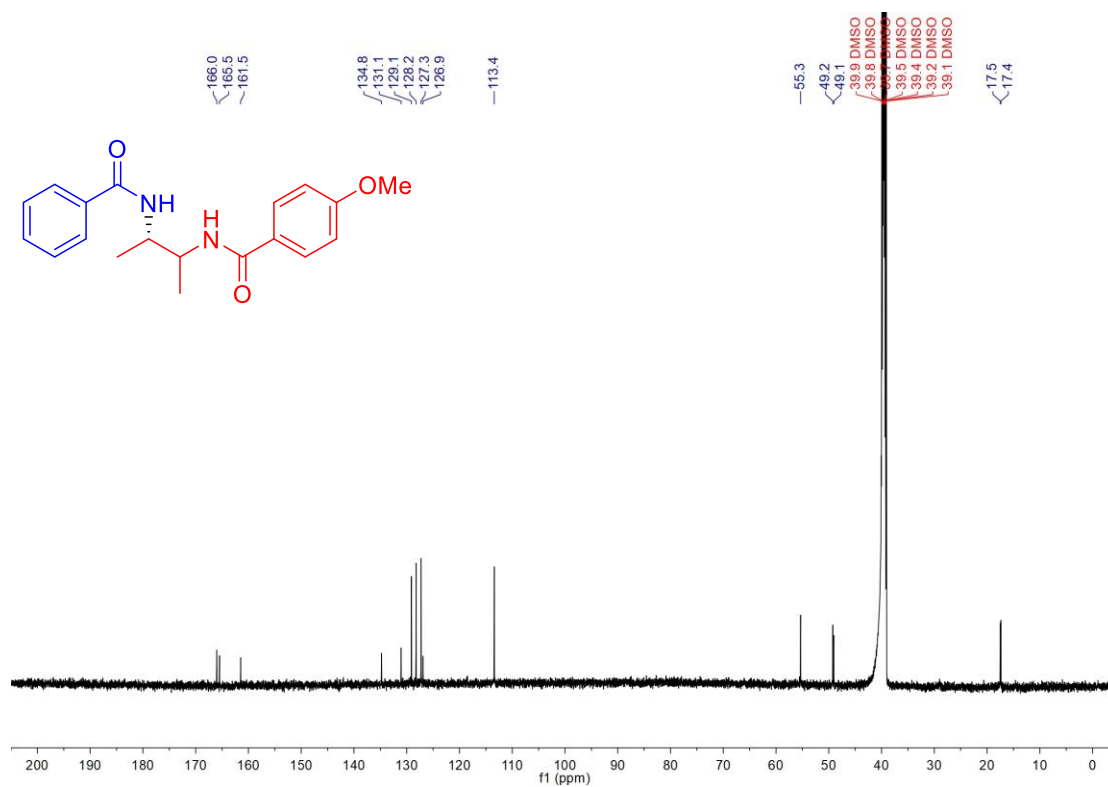

Chemical structure: CC(NC(=O)c1ccc(OC)cc1)[C@H](c2ccccc2)C(=O)c3ccccc3

<sup>1</sup>H NMR spectrum (DMSO-d<sub>6</sub>) showing peaks from 1.20 to 8.28 ppm. Integration values are provided below the baseline.

Figure S45.  $^1\text{H}$  NMR spectra (400 MHz,  $\text{DMSO-}d_6$ ) of *N*-((1*S*,2*S*)-2-Benzamido-1-cyclohexylpropyl)-4-methoxybenzamide (3da).

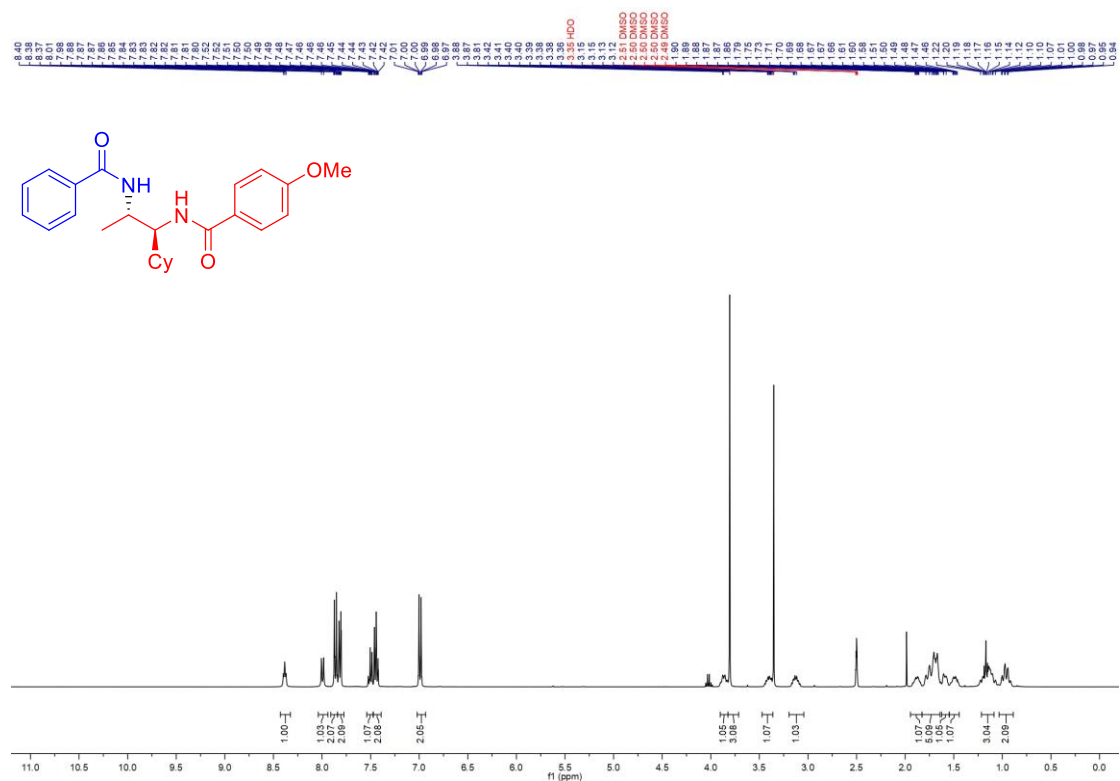

Figure S46.  $^{13}\text{C}$  NMR spectra (100 MHz,  $\text{DMSO-}d_6$ ) of *N*-((1*S*,2*S*)-2-Benzamido-1-cyclohexylpropyl)-4-methoxybenzamide (3da).

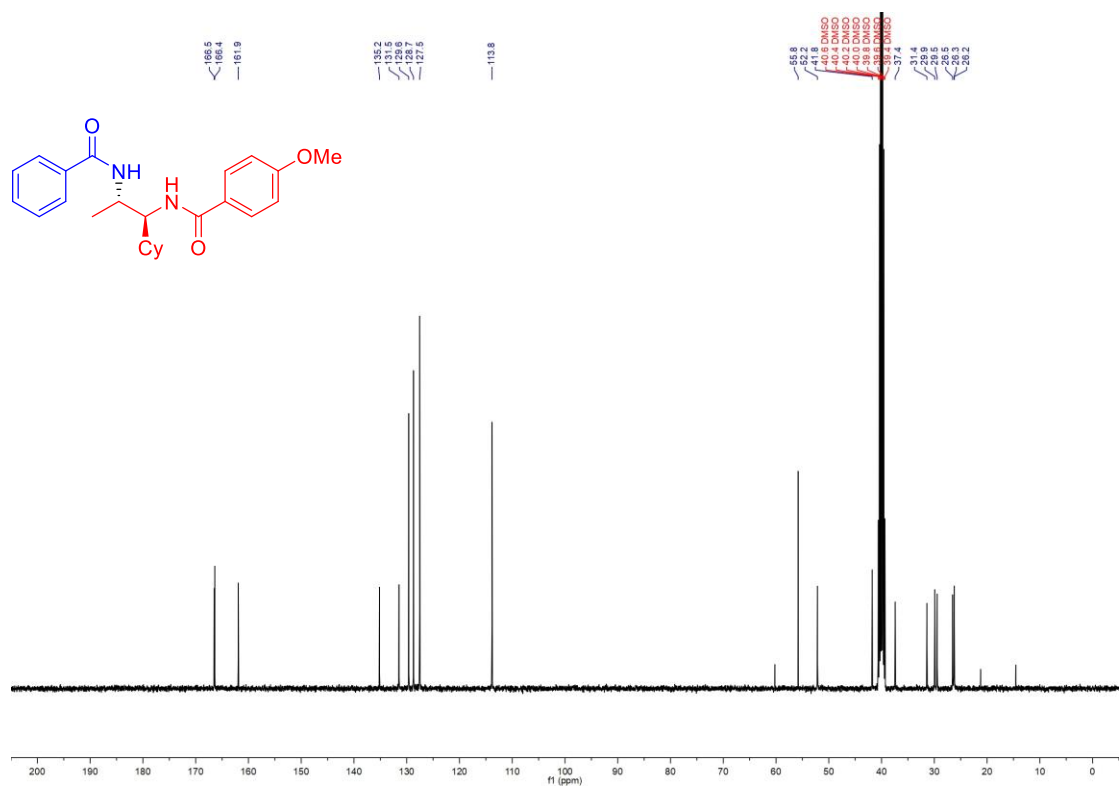

Figure S47.  $^1\text{H}$  NMR spectra (600 MHz,  $\text{DMSO-}d_6$ ) of (*S*)-*N*-(2-Benzamidobutyl)-4-methoxy benzamide (3ea)

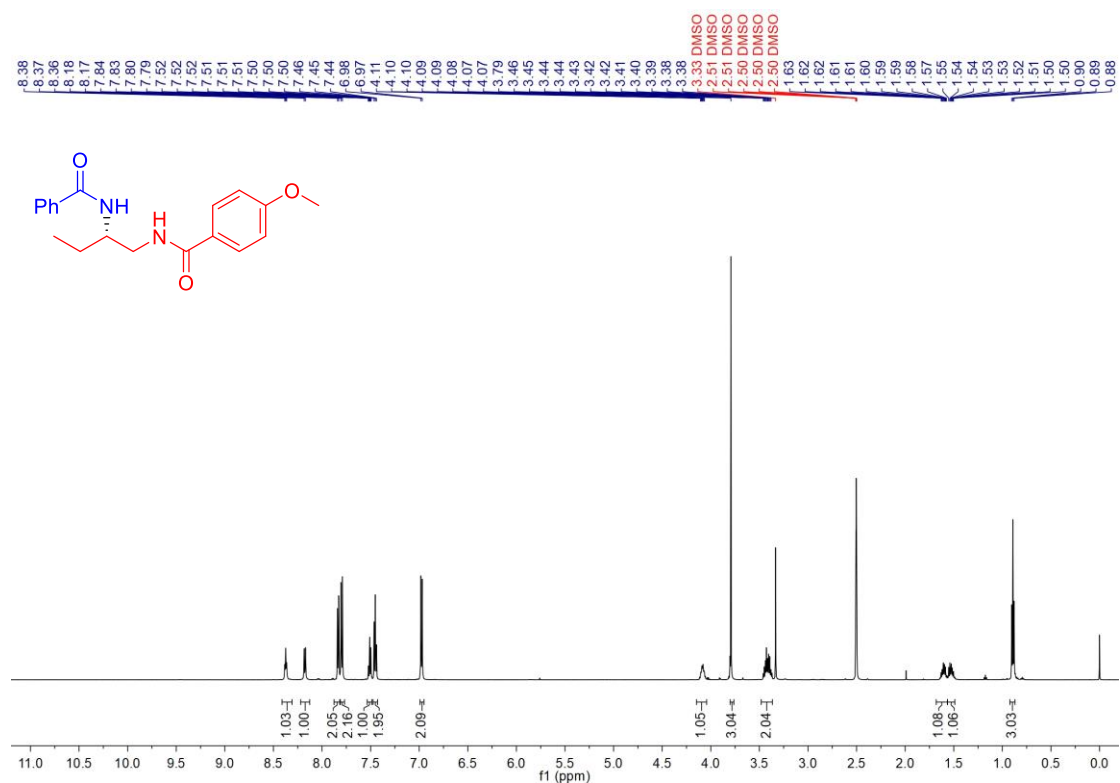

Figure S48.  $^{13}\text{C}$  NMR spectra (150 MHz,  $\text{DMSO-}d_6$ ) of (*S*)-*N*-(2-Benzamidobutyl)-4-methoxy benzamide (3ea)

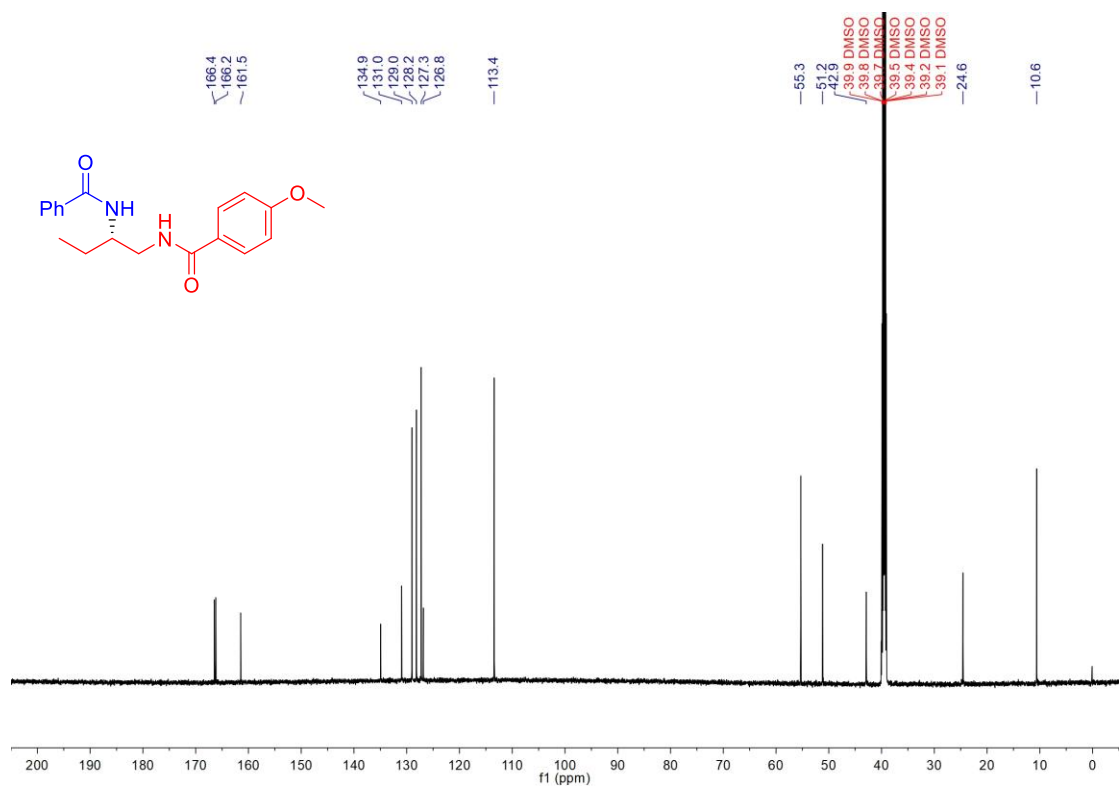

Figure S49.  $^1\text{H}$  NMR spectra (600 MHz,  $\text{DMSO-}d_6$ ) of *tert*-Butyl (*S*)-(2-(4-methoxybenzamido)propyl)carbamate (3fg)

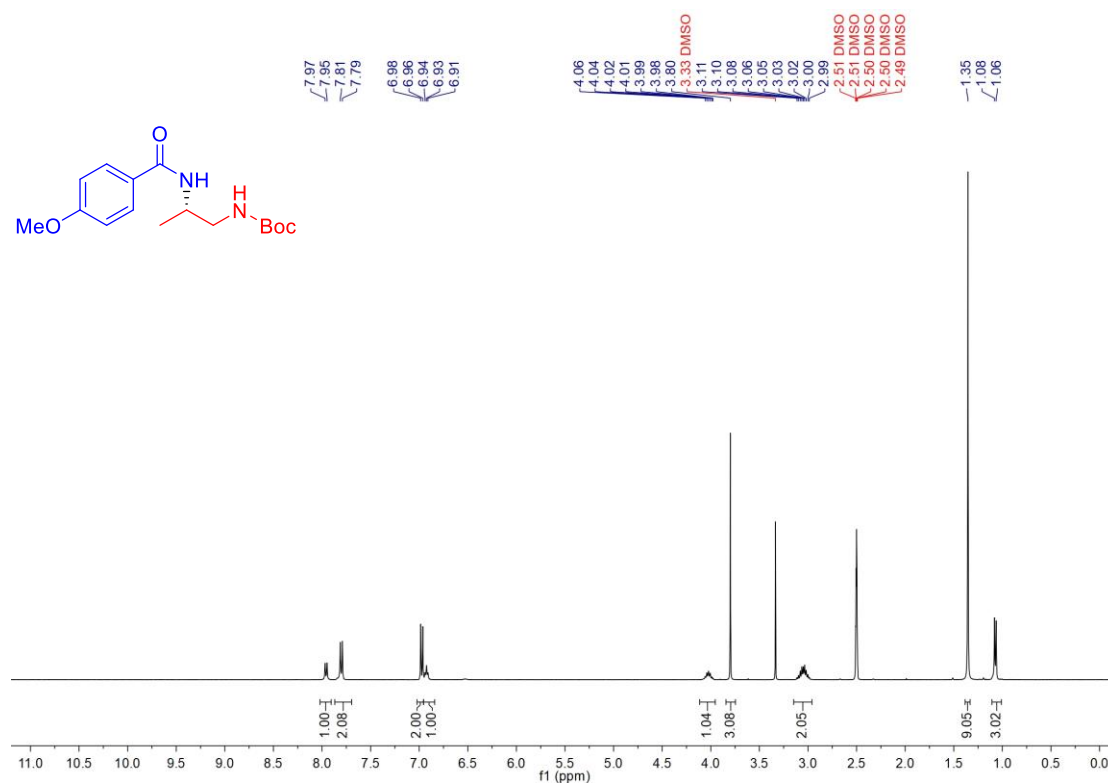

Figure S50.  $^{13}\text{C}$  NMR spectra (150 MHz,  $\text{DMSO-}d_6$ ) of *tert*-Butyl (*S*)-(2-(4-methoxybenzamido)propyl)carbamate (3fg)

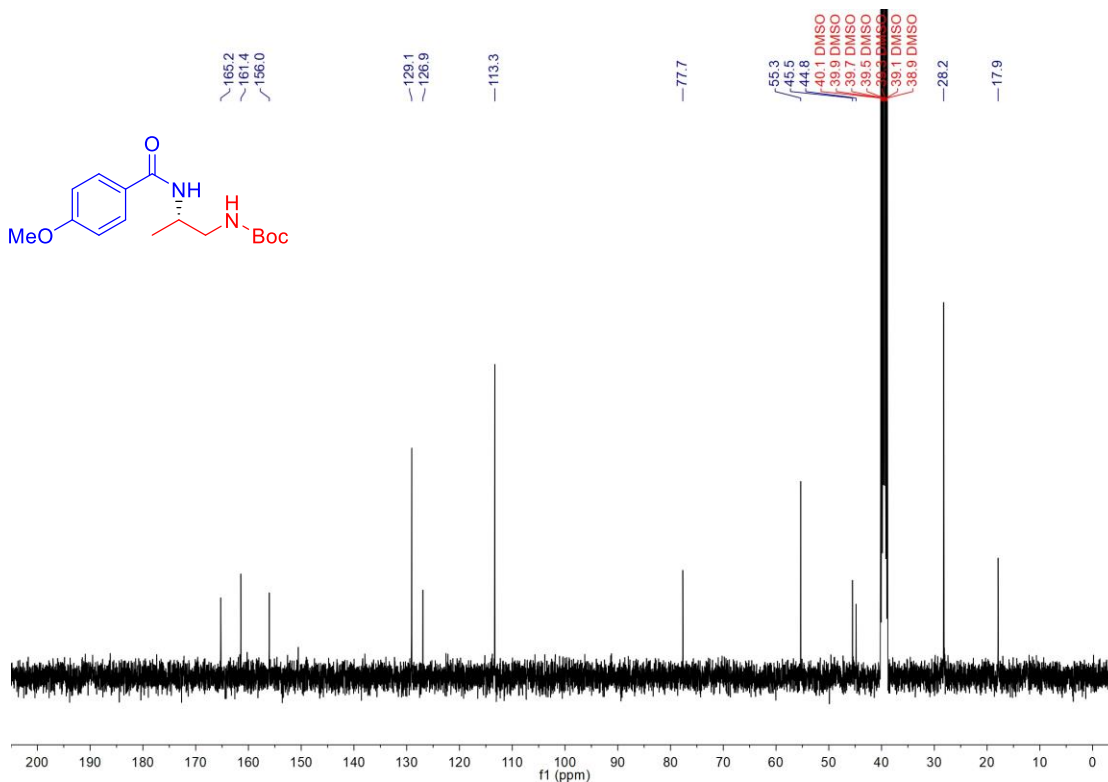

Figure S51. <sup>1</sup>H NMR spectra (400 MHz, DMSO-*d*<sub>6</sub>) of (*S*)-*N*-(4-((4-Methoxyphenyl)amino)-4-oxobutan-2-yl)benzamide (5aa).

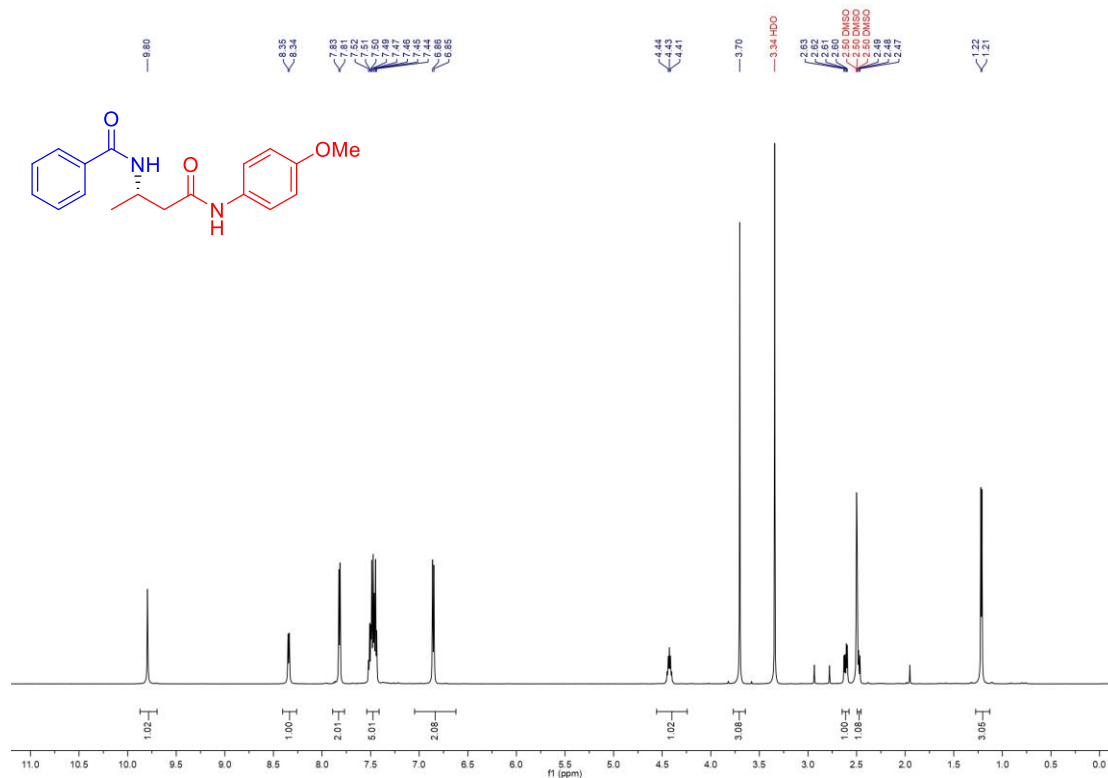

Figure S52. <sup>13</sup>C NMR spectra (100 MHz, DMSO-*d*<sub>6</sub>) of (*S*)-*N*-(4-((4-Methoxyphenyl)amino)-4-oxobutan-2-yl)benzamide (5aa).

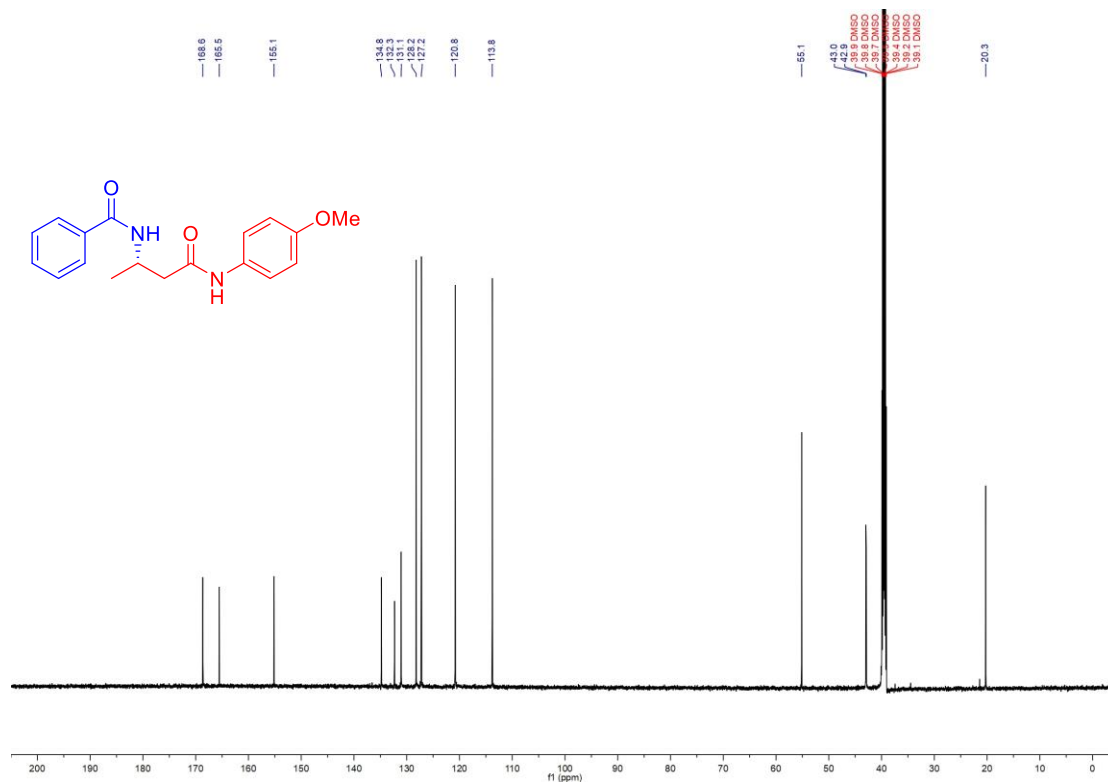

Figure S53.  $^1\text{H}$  NMR spectra (400 MHz, Chloroform-*d*) of (*S*)-*N*-(4-((4-Methoxyphenyl)amino)-4-oxobutan-2-yl)-2-methylbenzamide (5ab).

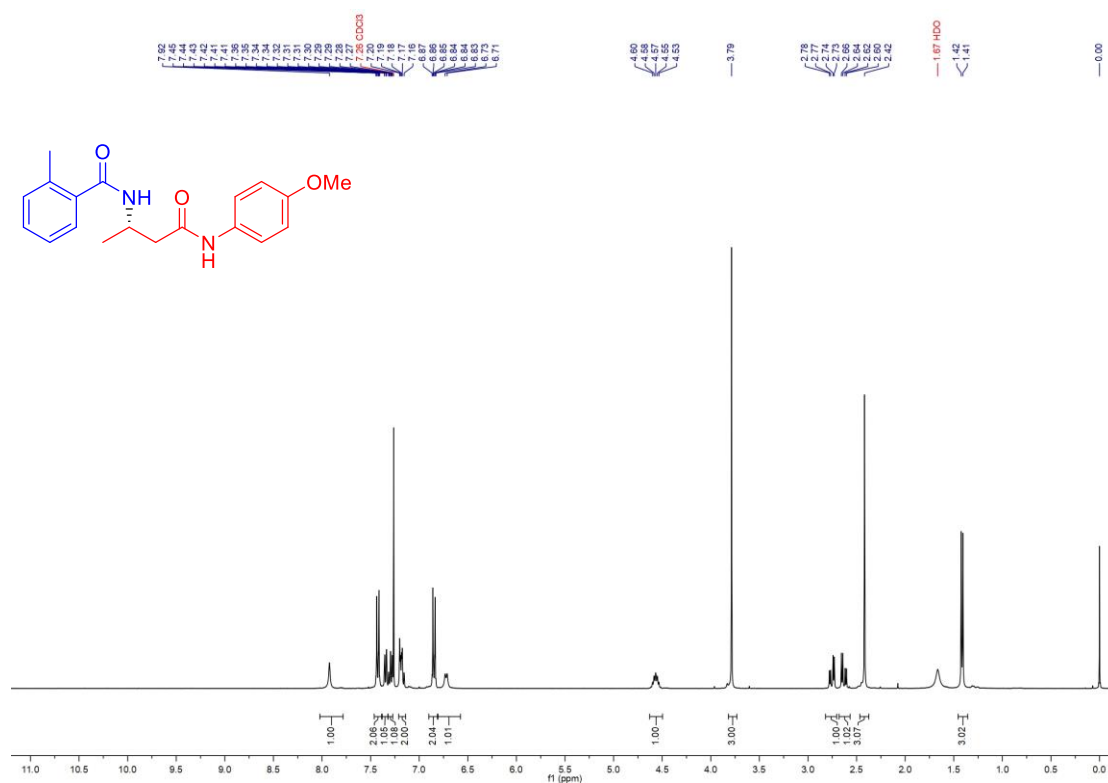

Figure S54.  $^{13}\text{C}$  NMR spectra (100 MHz, Chloroform-*d*) of (*S*)-*N*-(4-((4-Methoxyphenyl)amino)-4-oxobutan-2-yl)-2-methylbenzamide (5ab).

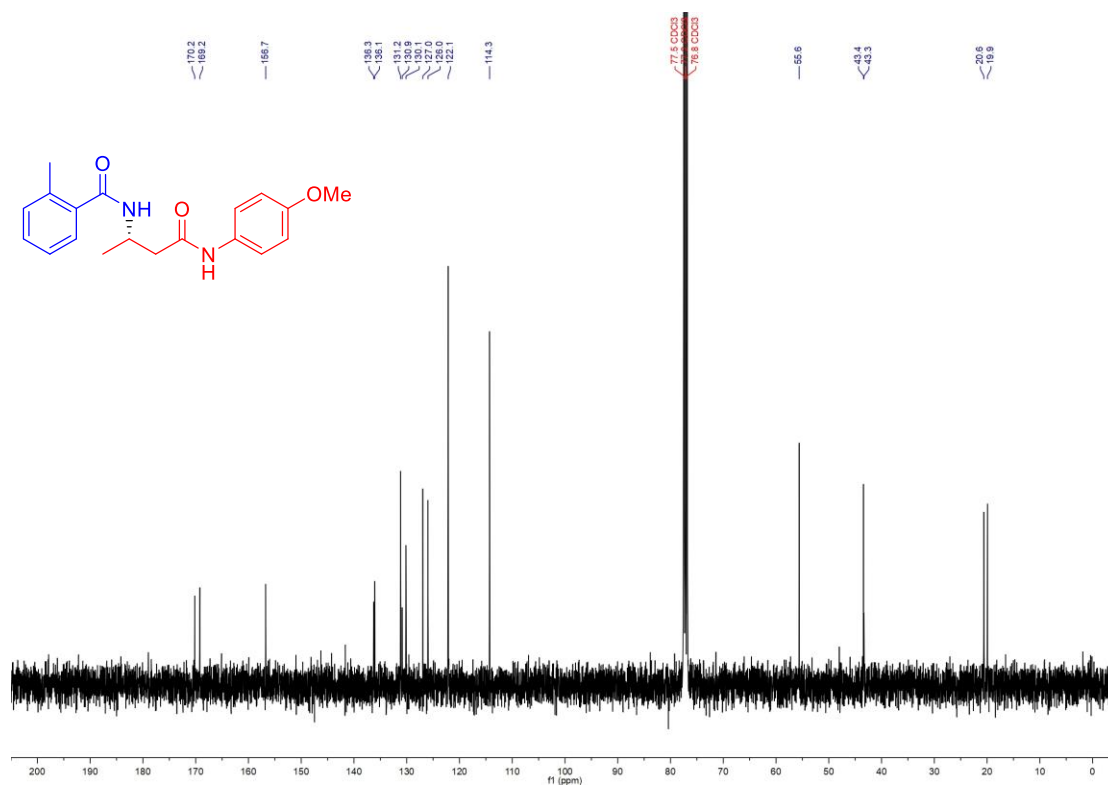



Figure S57.  $^1\text{H}$  NMR spectra (400 MHz,  $\text{DMSO}-d_6$ ) of (*S*)-*N*-(4-((4-Methoxyphenyl)amino)-4-oxobutan-2-yl)-3-methylbenzamide (5ad).

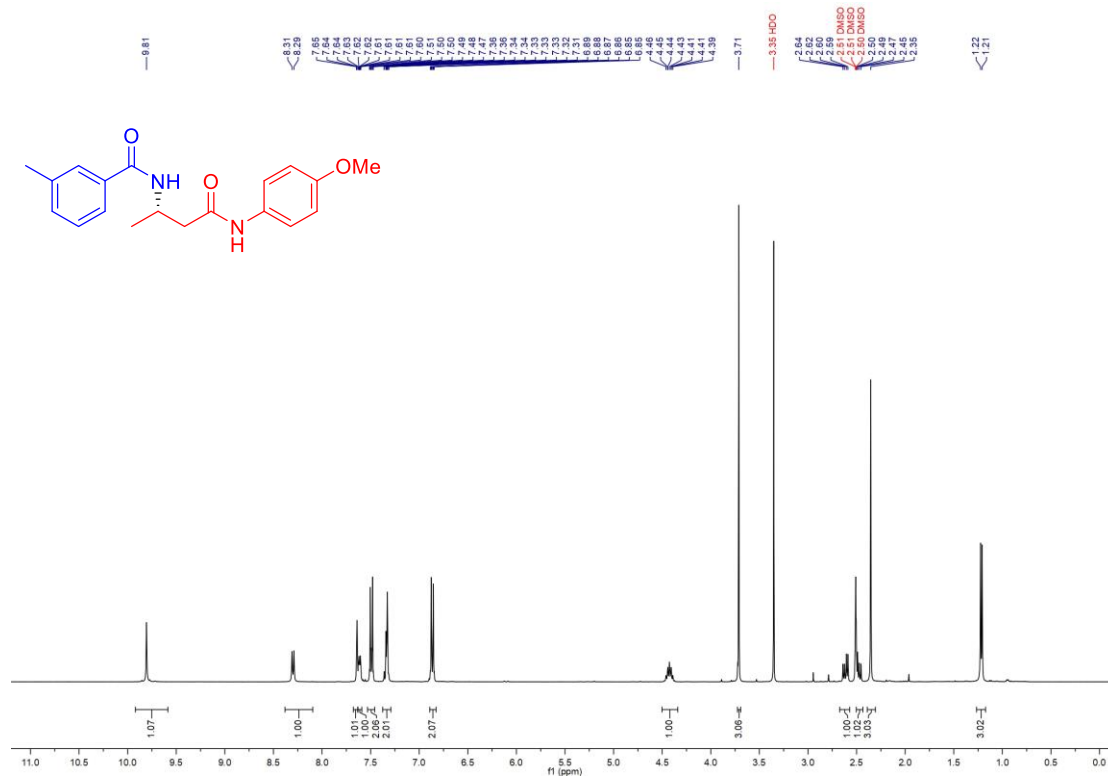

Figure S58.  $^{13}\text{C}$  NMR spectra (100 MHz,  $\text{DMSO}-d_6$ ) of (*S*)-*N*-(4-((4-Methoxyphenyl)amino)-4-oxobutan-2-yl)-3-methylbenzamide (5ad).

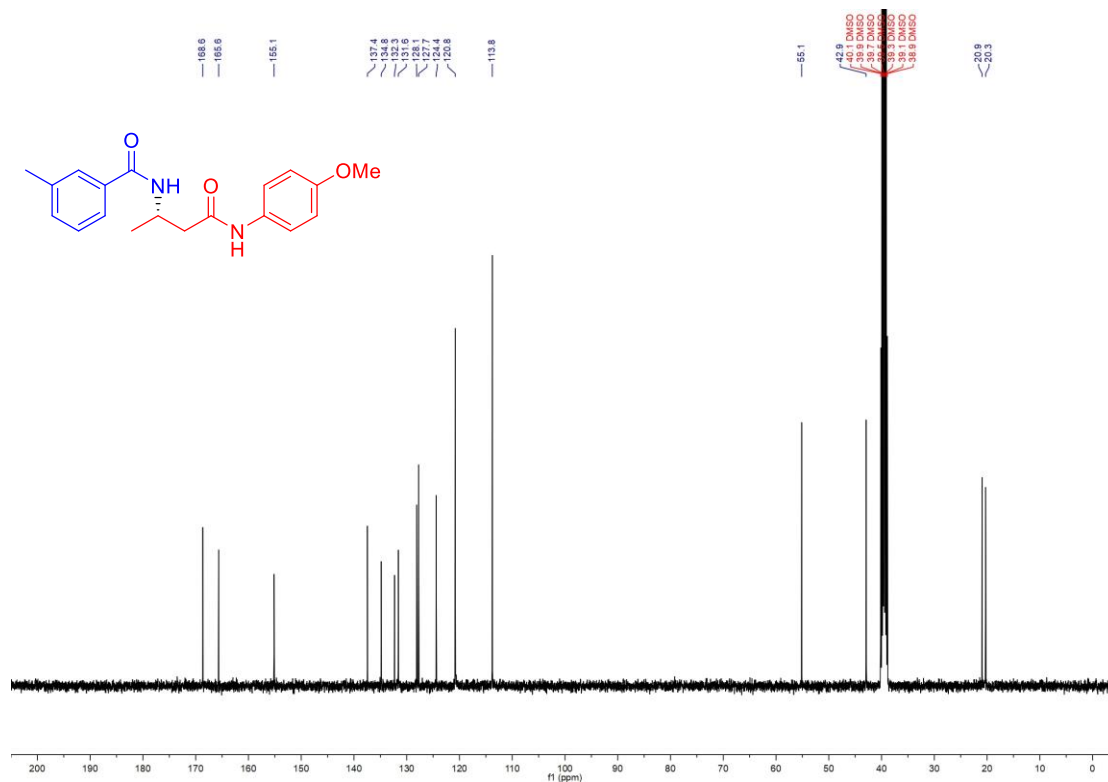

Figure S59.  $^1\text{H}$  NMR spectra (400 MHz,  $\text{DMSO-}d_6$ ) of (*S*)-3-Methoxy-*N*-(4-((4-methoxyphenyl)amino)-4-oxobutan-2-yl)benzamide (**5ae**).

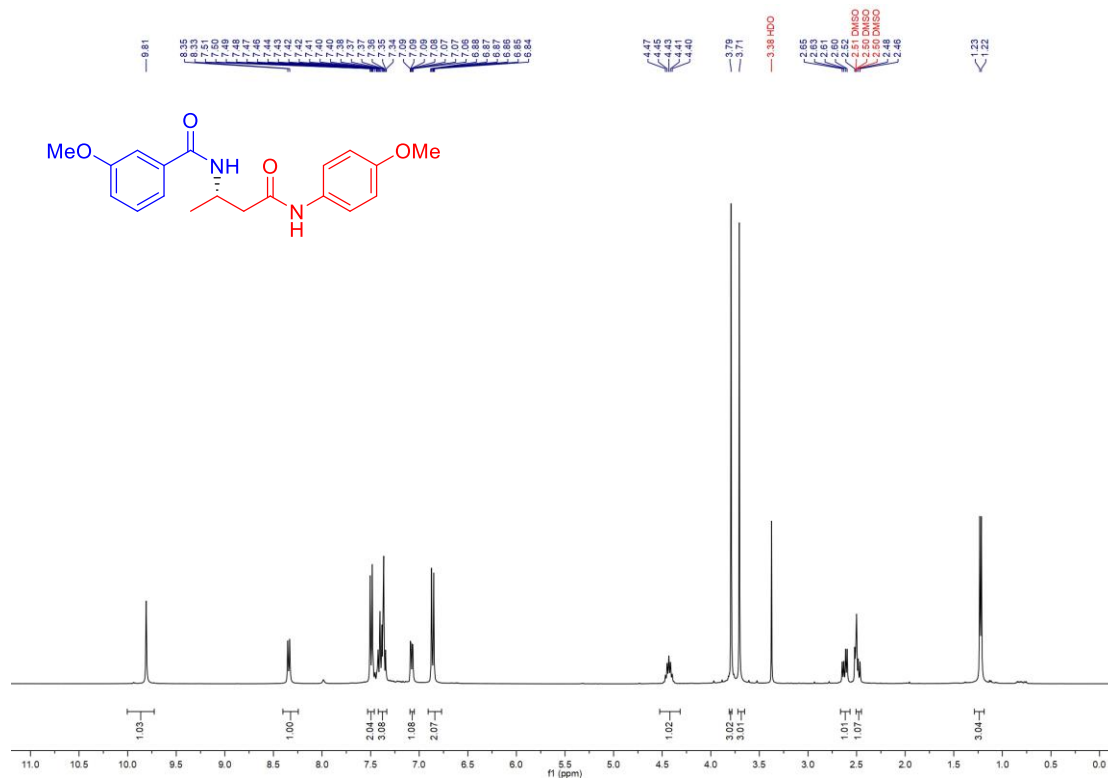

Figure S60.  $^{13}\text{C}$  NMR spectra (100 MHz,  $\text{DMSO-}d_6$ ) of (*S*)-3-Methoxy-*N*-(4-((4-methoxyphenyl)amino)-4-oxobutan-2-yl)benzamide (**5ae**).

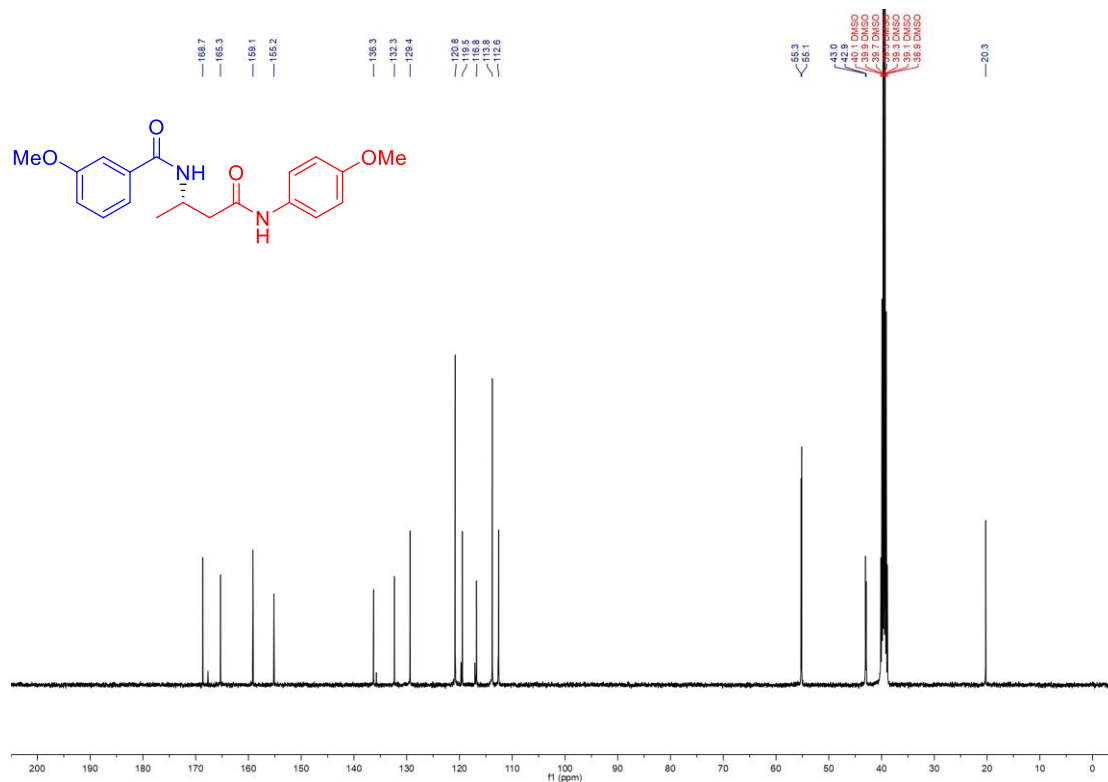

Figure S61.  $^1\text{H}$  NMR spectra (400 MHz,  $\text{DMSO-}d_6$ ) of (*S*)-4-Fluoro-*N*-(4-((4-methoxyphenyl)amino)-4-oxobutan-2-yl)benzamide (5ah).

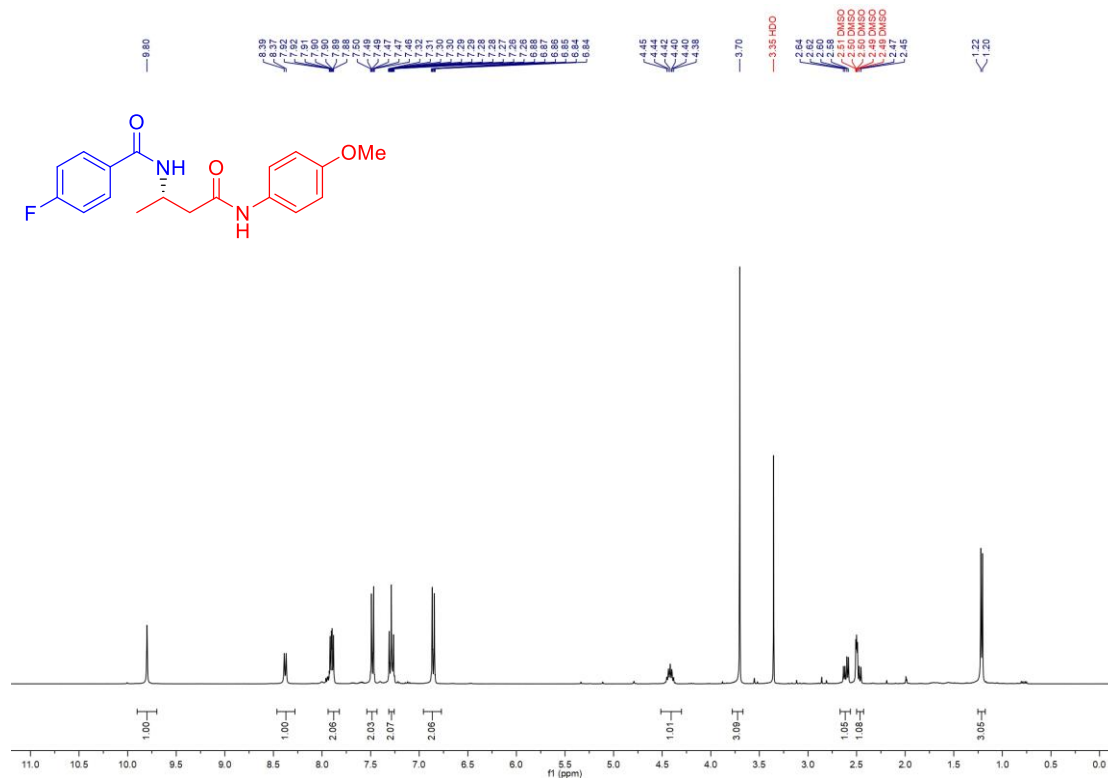

Figure S62.  $^{13}\text{C}$  NMR spectra (100 MHz,  $\text{DMSO-}d_6$ ) of (*S*)-4-Fluoro-*N*-(4-((4-methoxyphenyl)amino)-4-oxobutan-2-yl)benzamide (5ah).

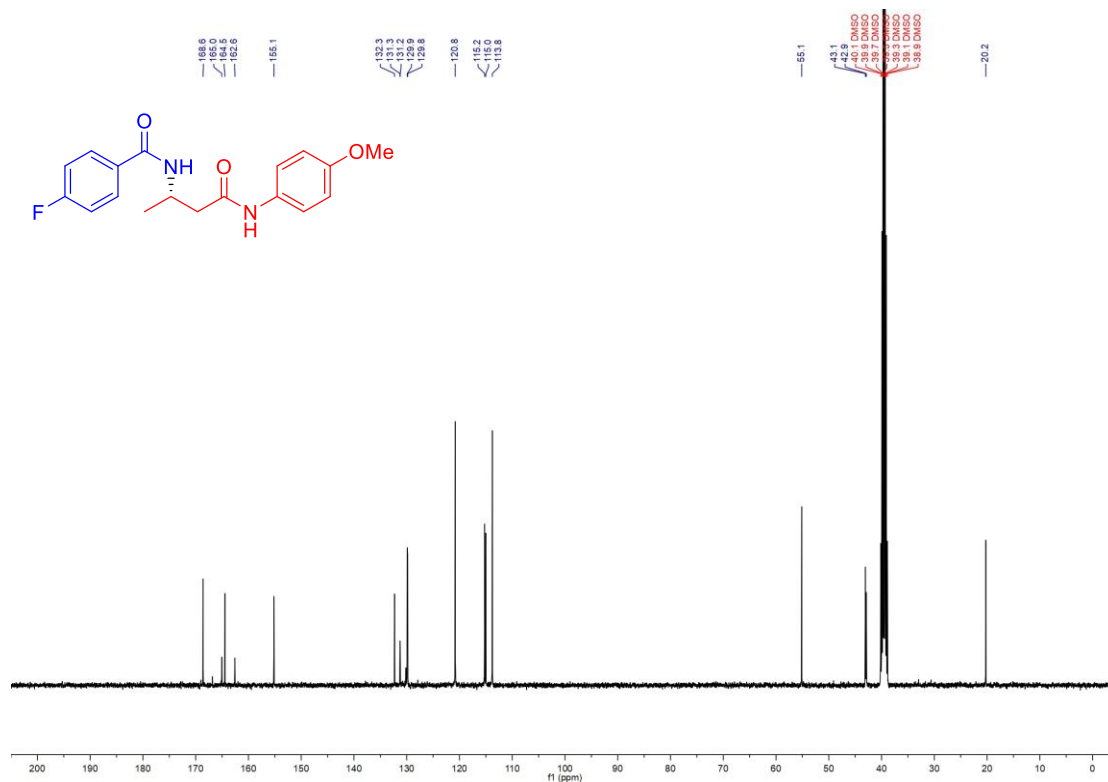

**Figure S63.**  $^{19}\text{F}$  NMR spectra (376 MHz,  $\text{DMSO-}d_6$ ) of (*S*)-4-Fluoro-*N*-(4-(4-methoxyphenyl) amino)-4-oxobutan-2-yl)benzamide (**5ah**).

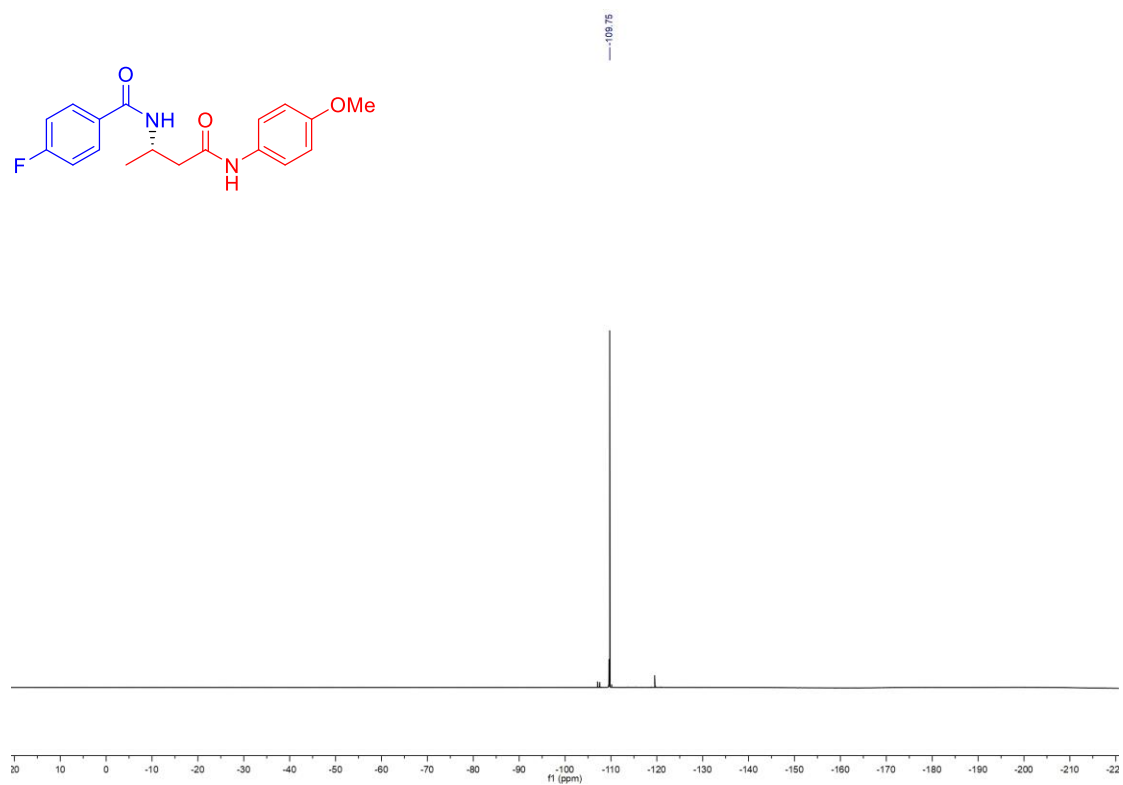

Figure S64.  $^1\text{H}$  NMR spectra (400 MHz,  $\text{DMSO}-d_6$ ) of (*S*)-4-Chloro-*N*-(4-((4-methoxyphenyl)amino)-4-oxobutan-2-yl)benzamide (5ai).

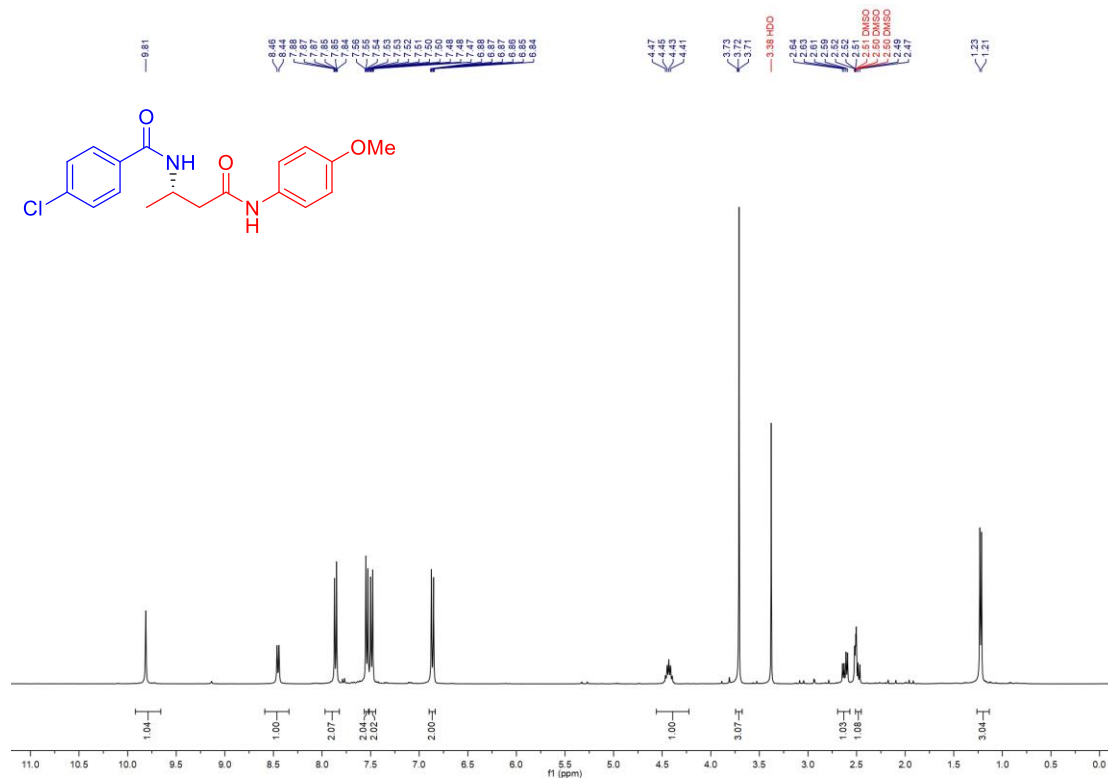

Figure S65.  $^{13}\text{C}$  NMR spectra (100 MHz,  $\text{DMSO}-d_6$ ) of (*S*)-4-Chloro-*N*-(4-((4-methoxyphenyl)amino)-4-oxobutan-2-yl)benzamide (5ai).

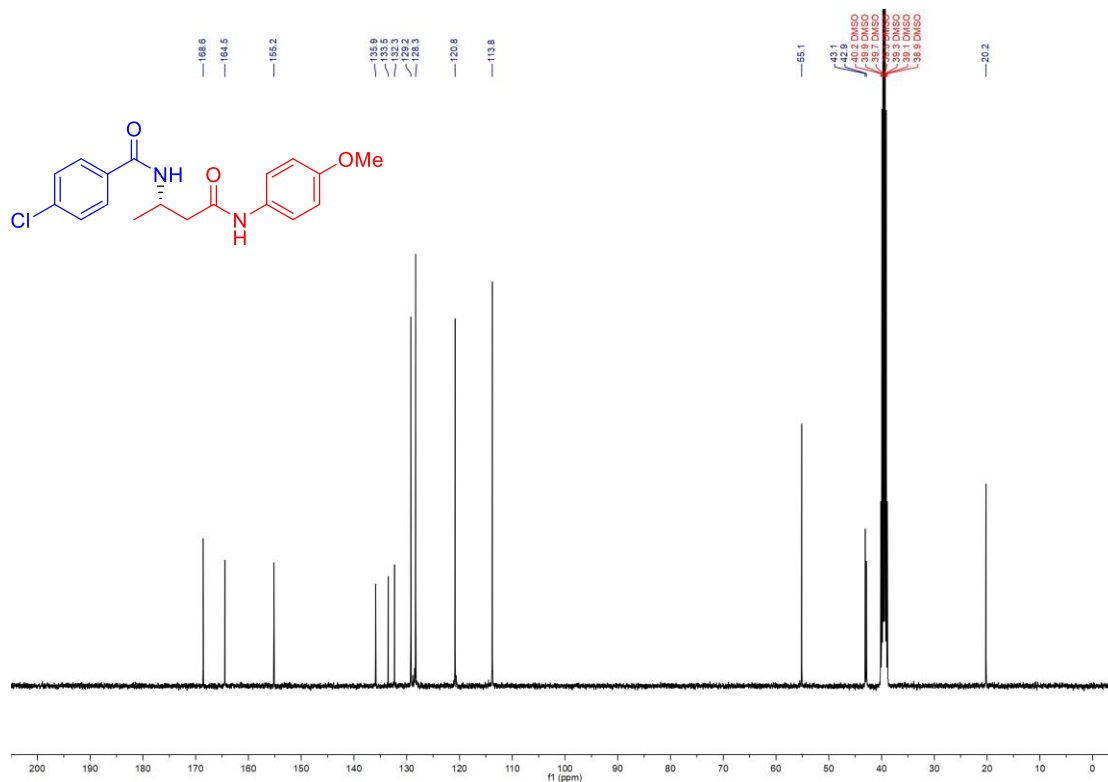

Figure S66.  $^1\text{H}$  NMR spectra (400 MHz,  $\text{DMSO-}d_6$ ) of (*S*)-4-Bromo-*N*-(4-((4-methoxyphenyl)amino)-4-oxobutan-2-yl)benzamide (5aj).

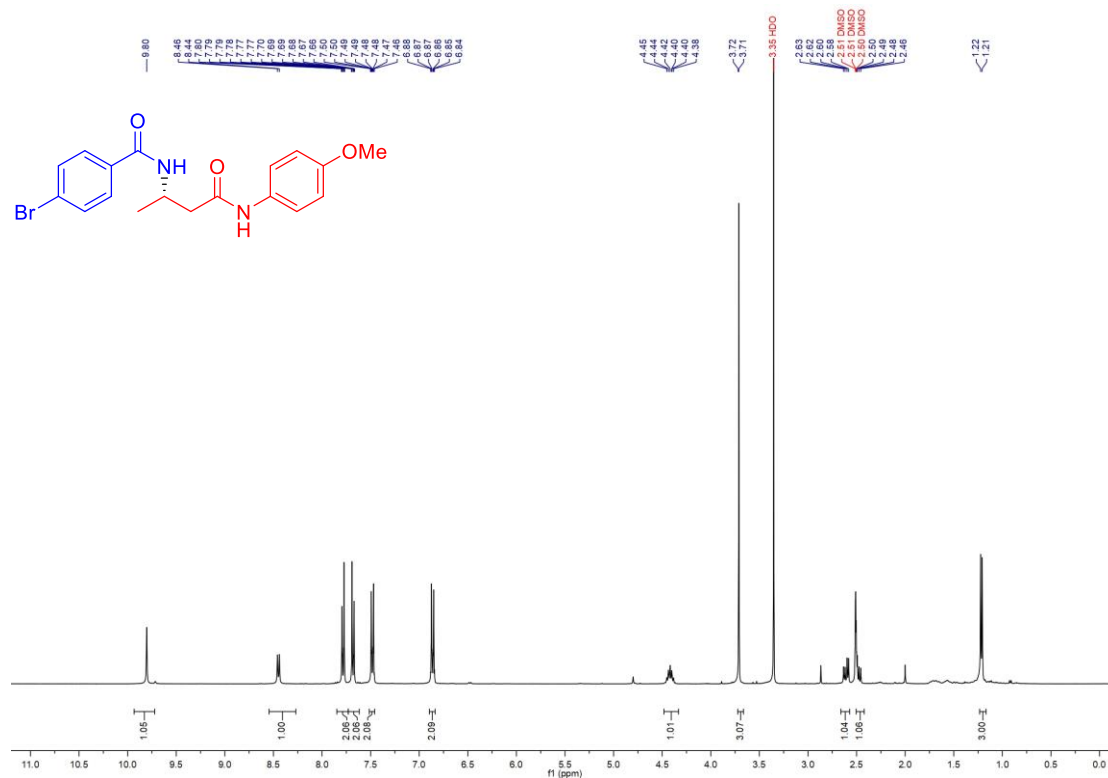

Figure S67.  $^{13}\text{C}$  NMR spectra (100 MHz,  $\text{DMSO-}d_6$ ) of (*S*)-4-Bromo-*N*-(4-((4-methoxyphenyl)amino)-4-oxobutan-2-yl)benzamide (5aj).

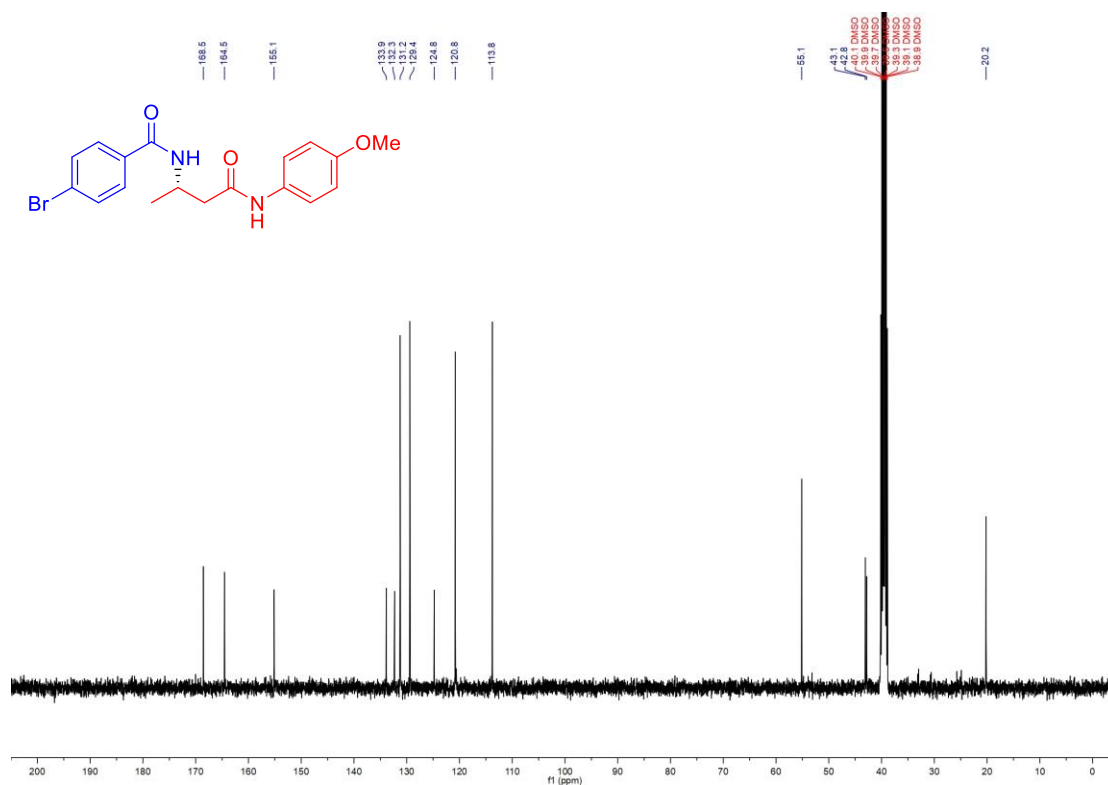

Figure S68.  $^1\text{H}$  NMR spectra (400 MHz,  $\text{DMSO}-d_6$ ) of (*S*)-*N*-(4-((4-Methoxyphenyl)amino)-4-oxobutan-2-yl)-4-(trifluoromethoxy)benzamide (5ak).

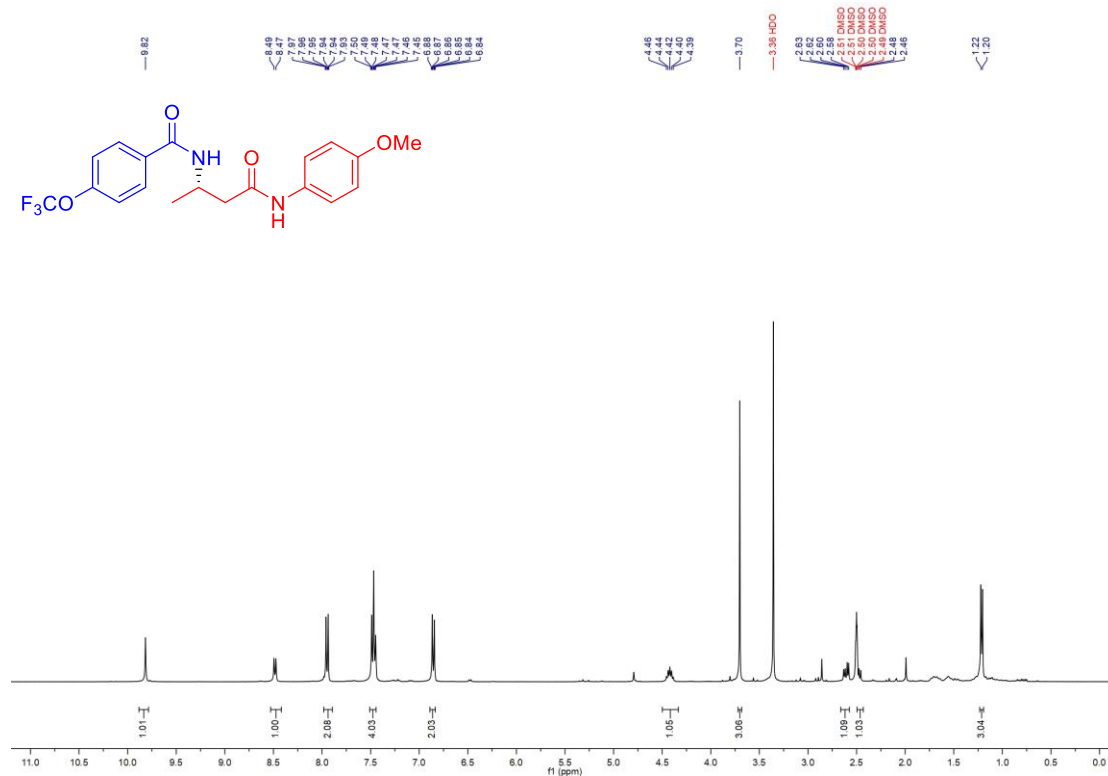

Figure S69.  $^{13}\text{C}$  NMR spectra (100 MHz,  $\text{DMSO}-d_6$ ) of (*S*)-*N*-(4-((4-Methoxyphenyl)amino)-4-oxobutan-2-yl)-4-(trifluoromethoxy)benzamide (5ak).

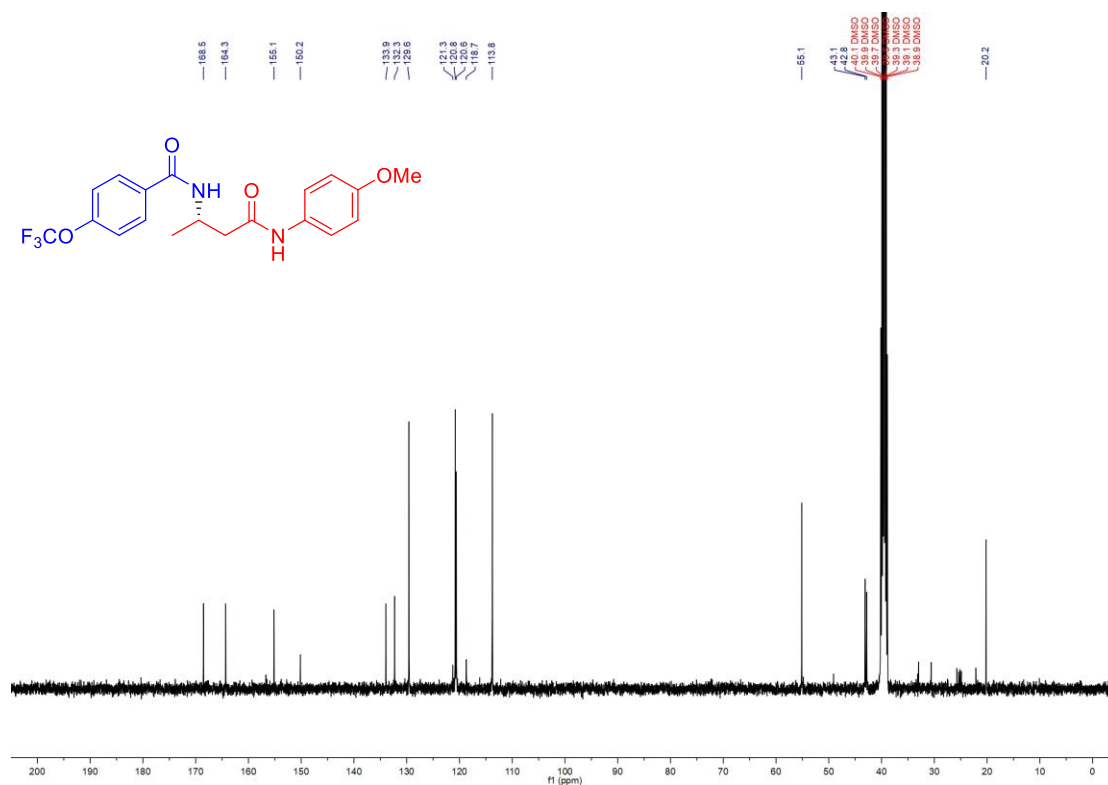

**Figure S70.**  $^{19}\text{F}$  NMR spectra (376 MHz,  $\text{DMSO-}d_6$ ) of (*S*)-*N*-(4-((4-Methoxyphenyl)amino)-4-oxobutan-2-yl)-4-(trifluoromethoxy)benzamide (**5ak**).

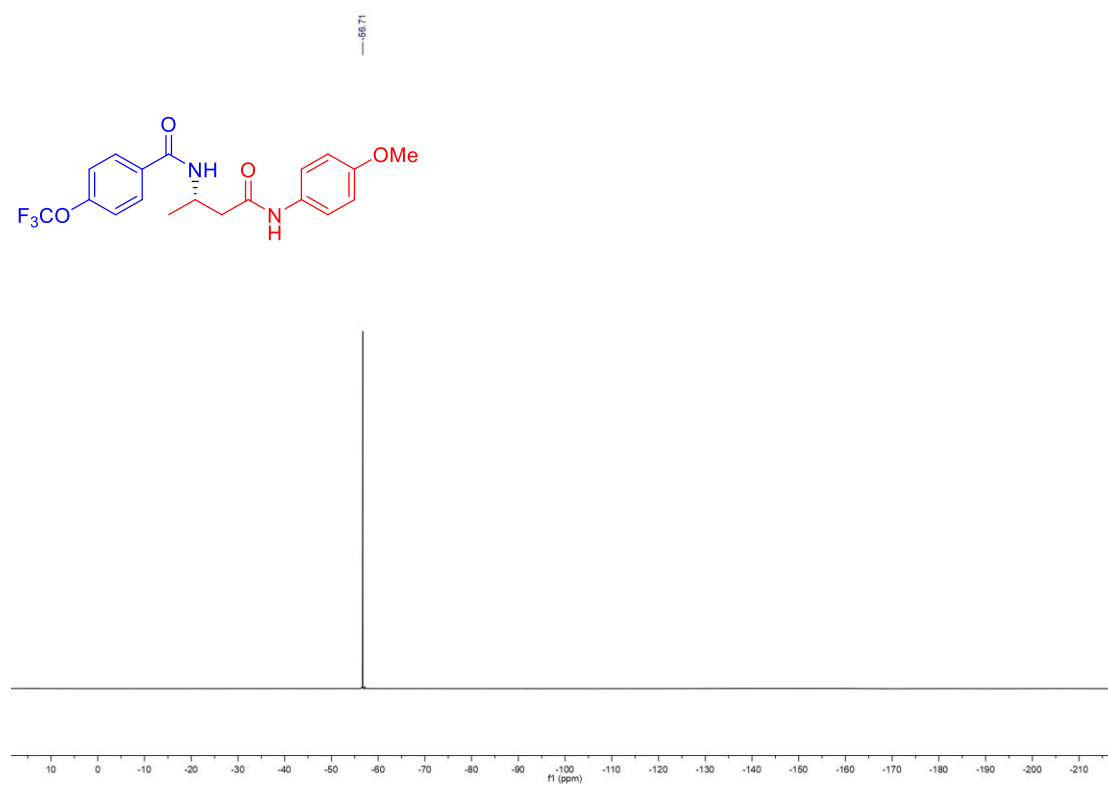

Figure S71.  $^1\text{H}$  NMR spectra (400 MHz,  $\text{DMSO}-d_6$ ) of (*S*)-*N*-(4-((4-Methoxyphenyl)amino)-4-oxobutan-2-yl)-4-((trifluoromethyl)thio)benzamide (5am).

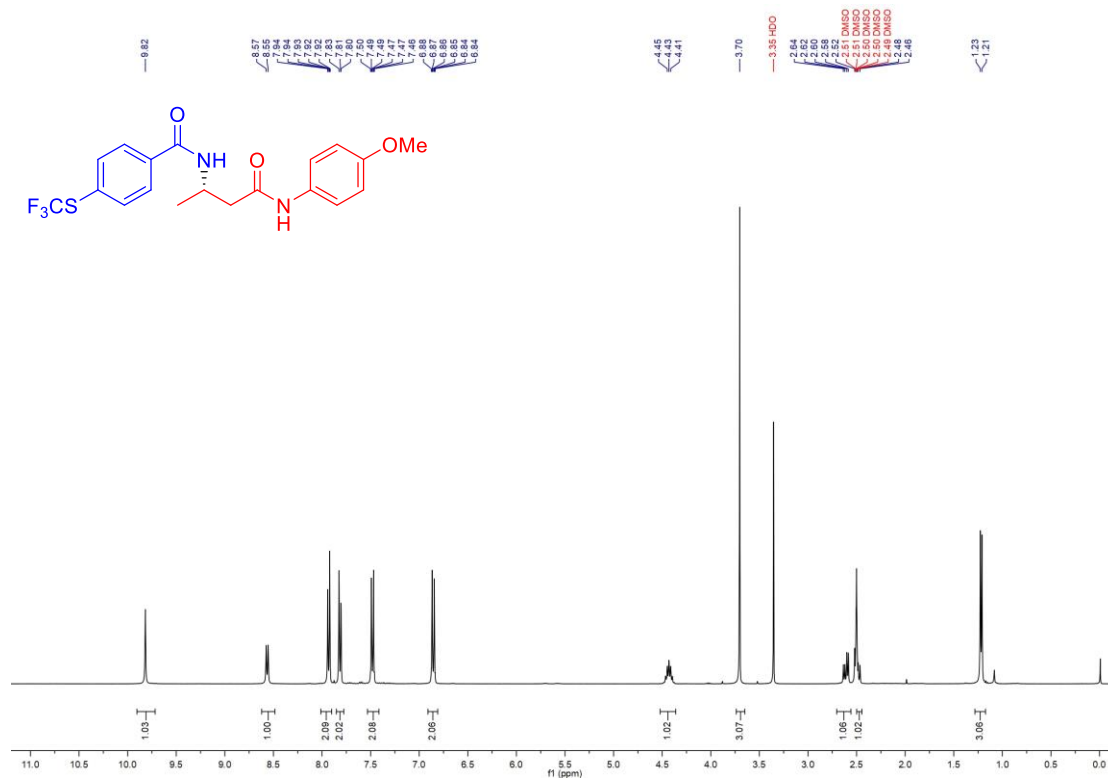

Figure S72.  $^{13}\text{C}$  NMR spectra (100 MHz,  $\text{DMSO}-d_6$ ) of (*S*)-*N*-(4-((4-Methoxyphenyl)amino)-4-oxobutan-2-yl)-4-((trifluoromethyl)thio)benzamide (5am).

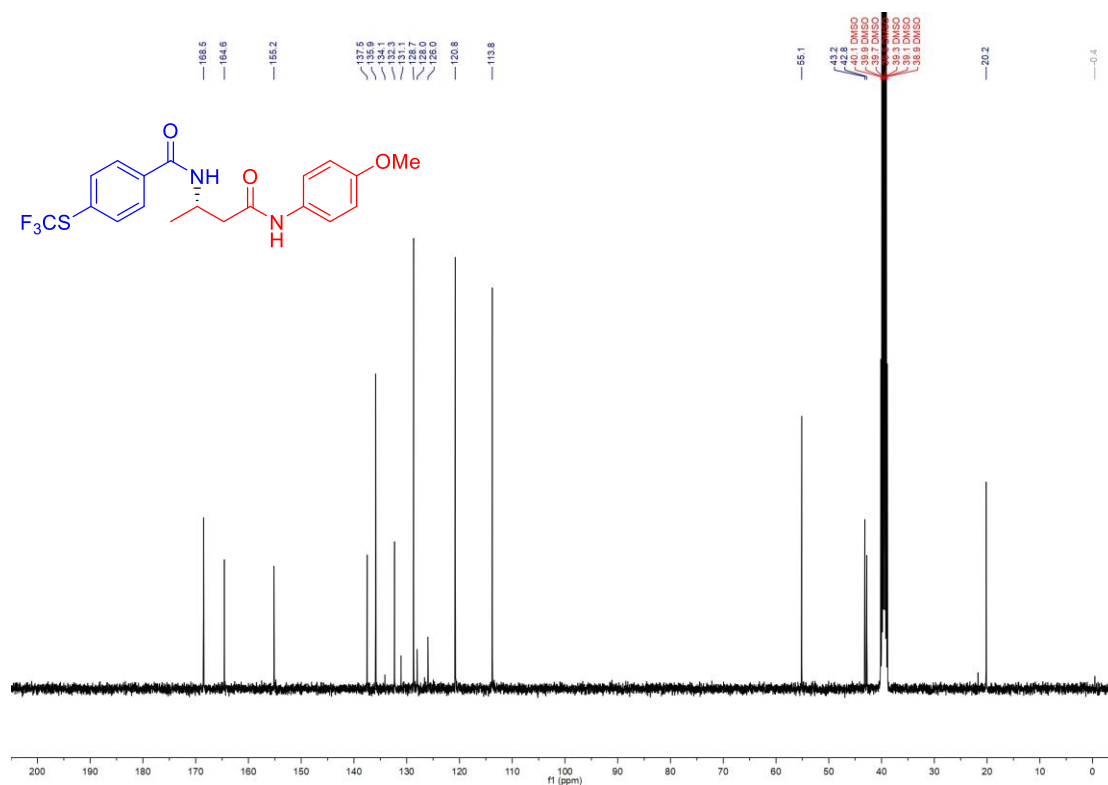

**Figure S73.**  $^{19}\text{F}$  NMR spectra (376 MHz,  $\text{DMSO-}d_6$ ) of (*S*)-*N*-(4-((4-Methoxyphenyl)amino)-4-oxobutan-2-yl)-4-((trifluoromethyl)thio)benzamide (**5am**).

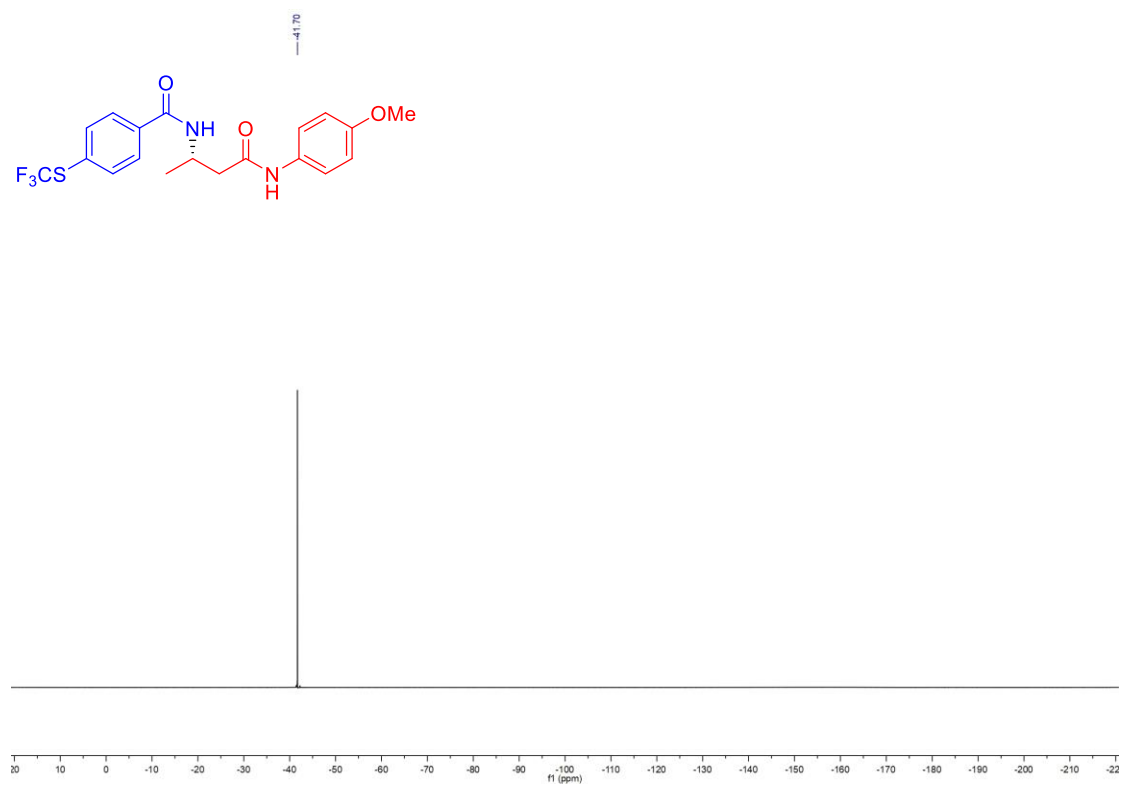

Figure S74.  $^1\text{H}$  NMR spectra (400 MHz,  $\text{DMSO-}d_6$ ) of (*S*)-*N*-(4-((4-Methoxyphenyl)amino)-4-oxobutan-2-yl)benzo[*d*][1,3]dioxole-5-carboxamide (**5an**).

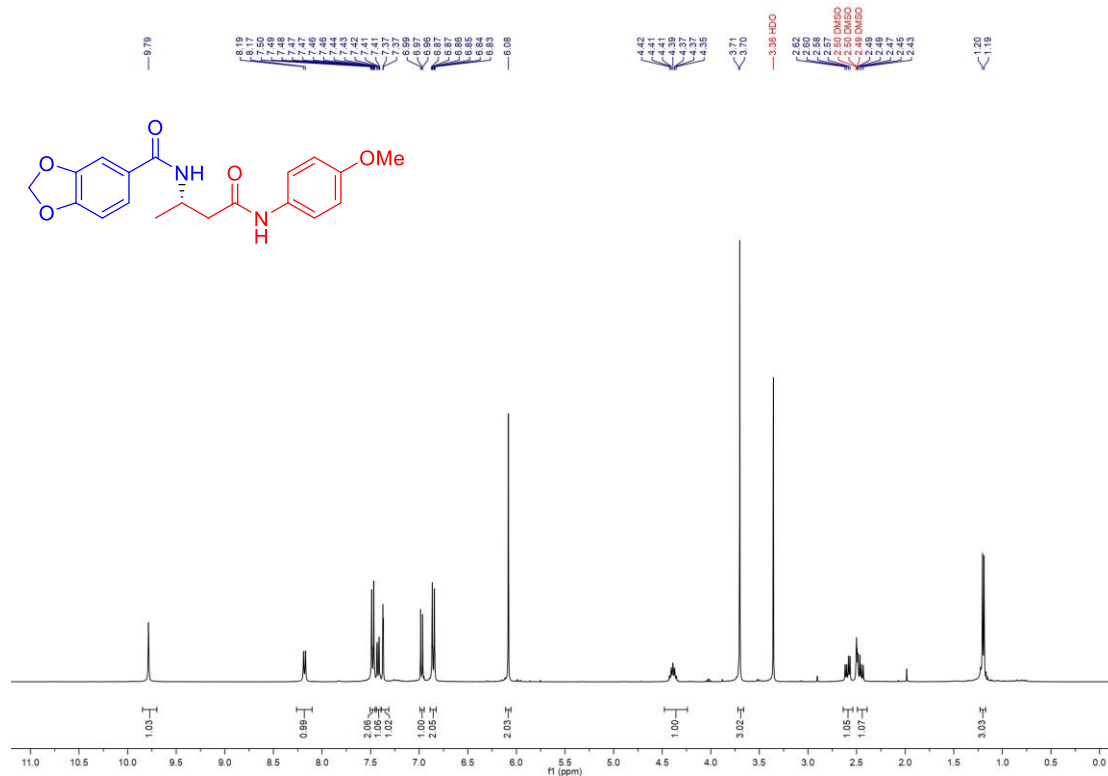

Figure S75.  $^{13}\text{C}$  NMR spectra (100 MHz,  $\text{DMSO-}d_6$ ) of (*S*)-*N*-(4-((4-Methoxyphenyl)amino)-4-oxobutan-2-yl)benzo[*d*][1,3]dioxole-5-carboxamide (**5an**).

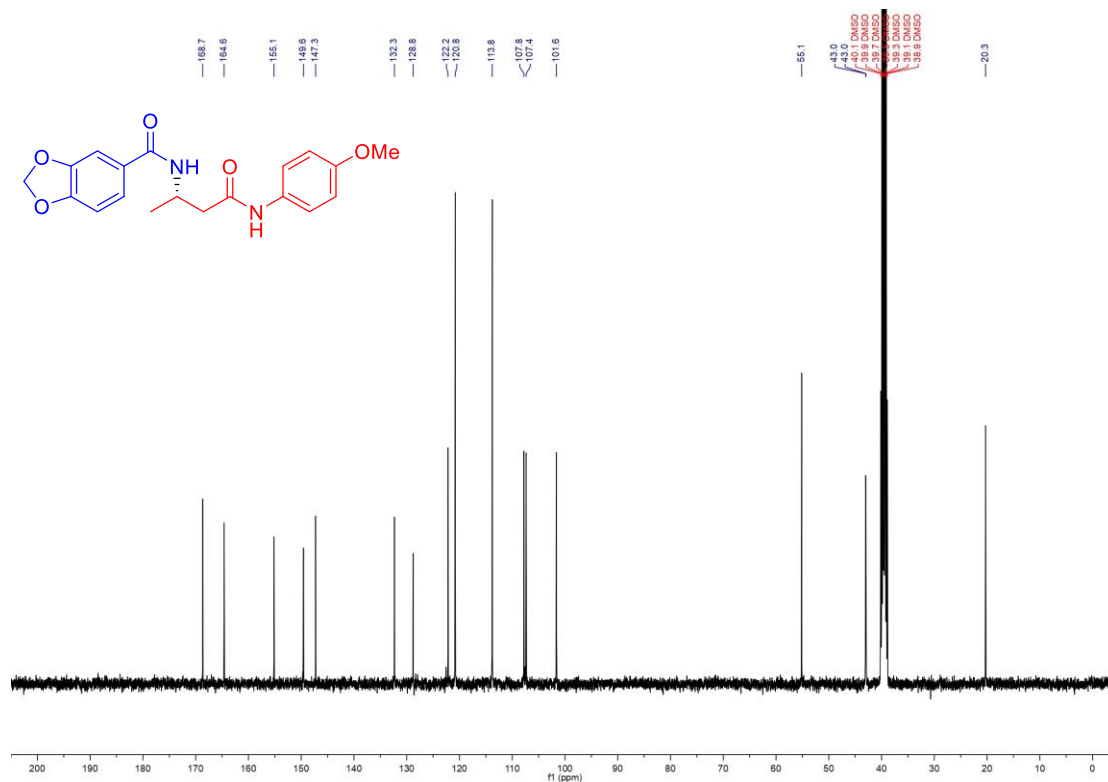

Figure S76.  $^1\text{H}$  NMR spectra (400 MHz,  $\text{DMSO}-d_6$ ) of (*S*)-*N*-(4-((4-Methoxyphenyl)amino)-4-oxobutan-2-yl)thiophene-2-carboxamide (5al).

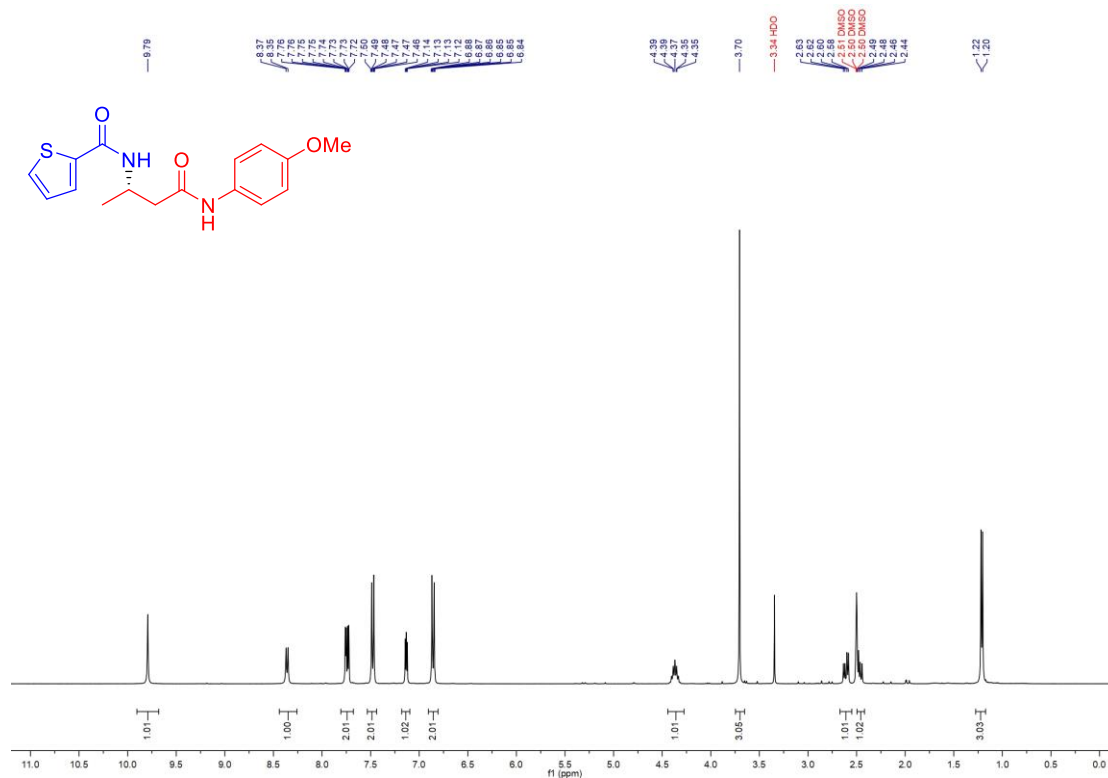

Figure S77.  $^{13}\text{C}$  NMR spectra (100 MHz,  $\text{DMSO}-d_6$ ) of (*S*)-*N*-(4-((4-Methoxyphenyl)amino)-4-oxobutan-2-yl)thiophene-2-carboxamide (5al).

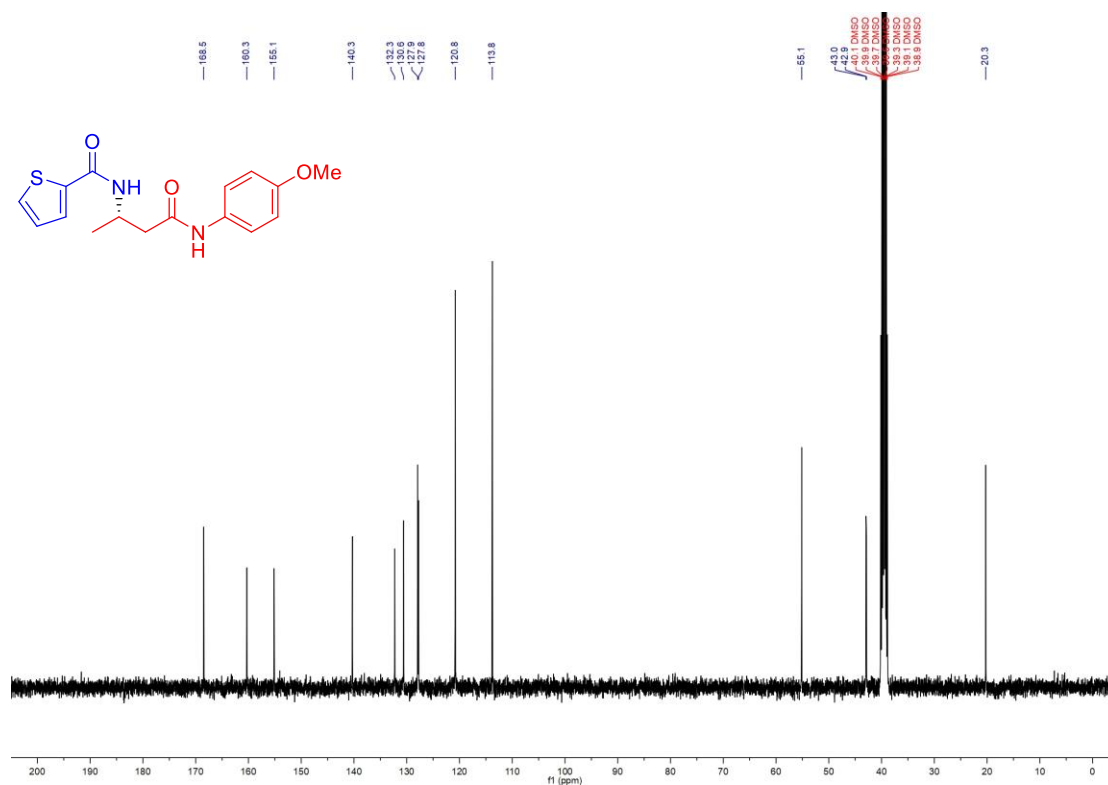

Figure S78.  $^1\text{H}$  NMR spectra (400 MHz,  $\text{DMSO}-d_6$ ) of (*S*)-*N*-(4-Methoxyphenyl)-3-pivalami dobutanamide (5ao).

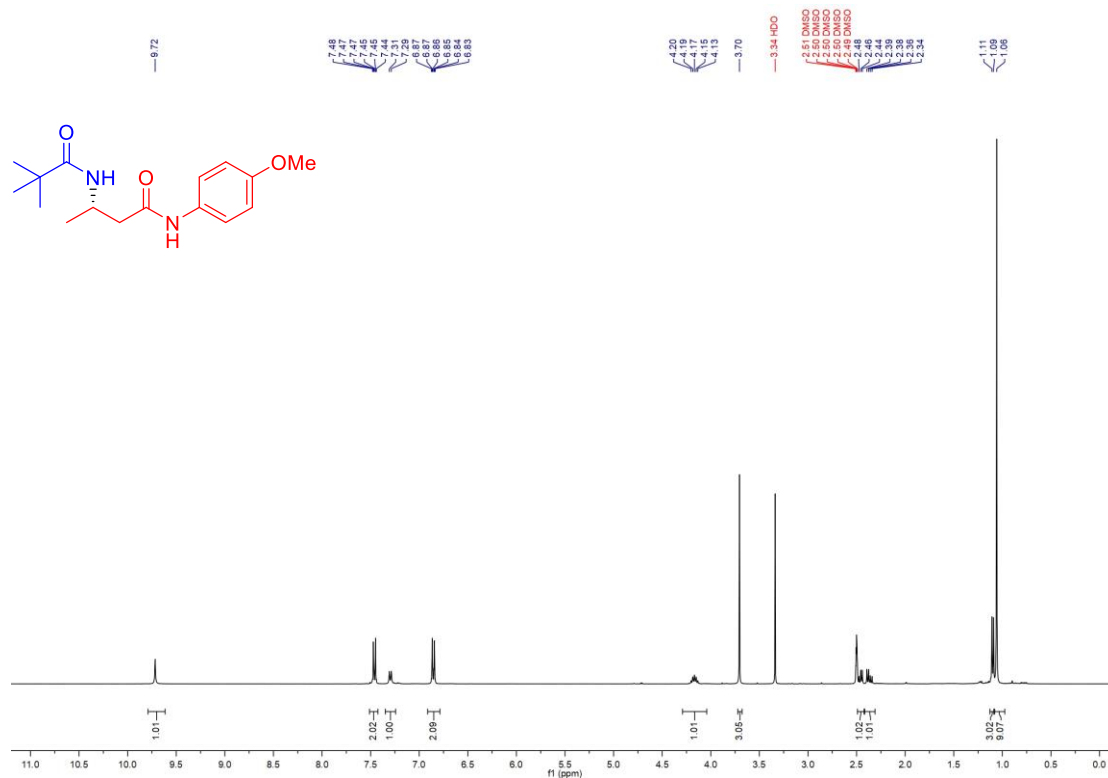

Figure S79.  $^{13}\text{C}$  NMR spectra (100 MHz,  $\text{DMSO}-d_6$ ) of (*S*)-*N*-(4-Methoxyphenyl)-3-pivalami dobutanamide (5ao).

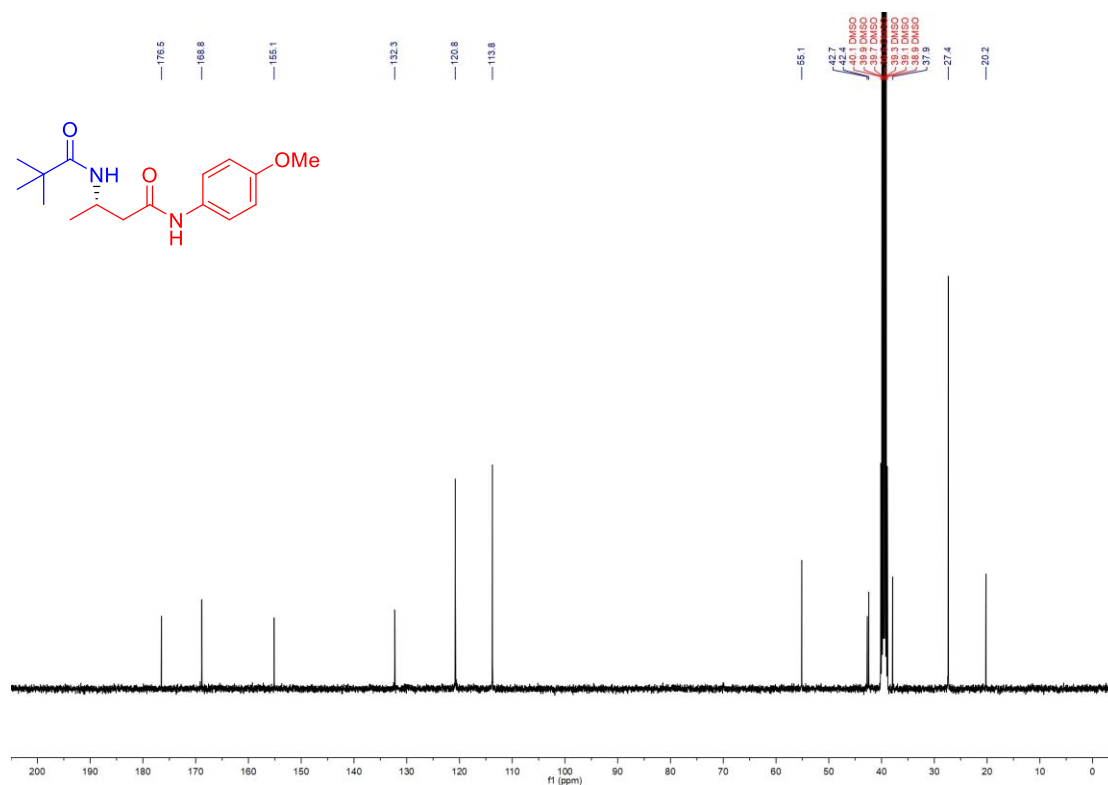

Figure S80.  $^1\text{H}$  NMR spectra (400 MHz,  $\text{DMSO}-d_6$ ) of (*S*)-*N*-(4-(Benzylamino)-4-oxobutan-2-yl)benzamide (5ba).

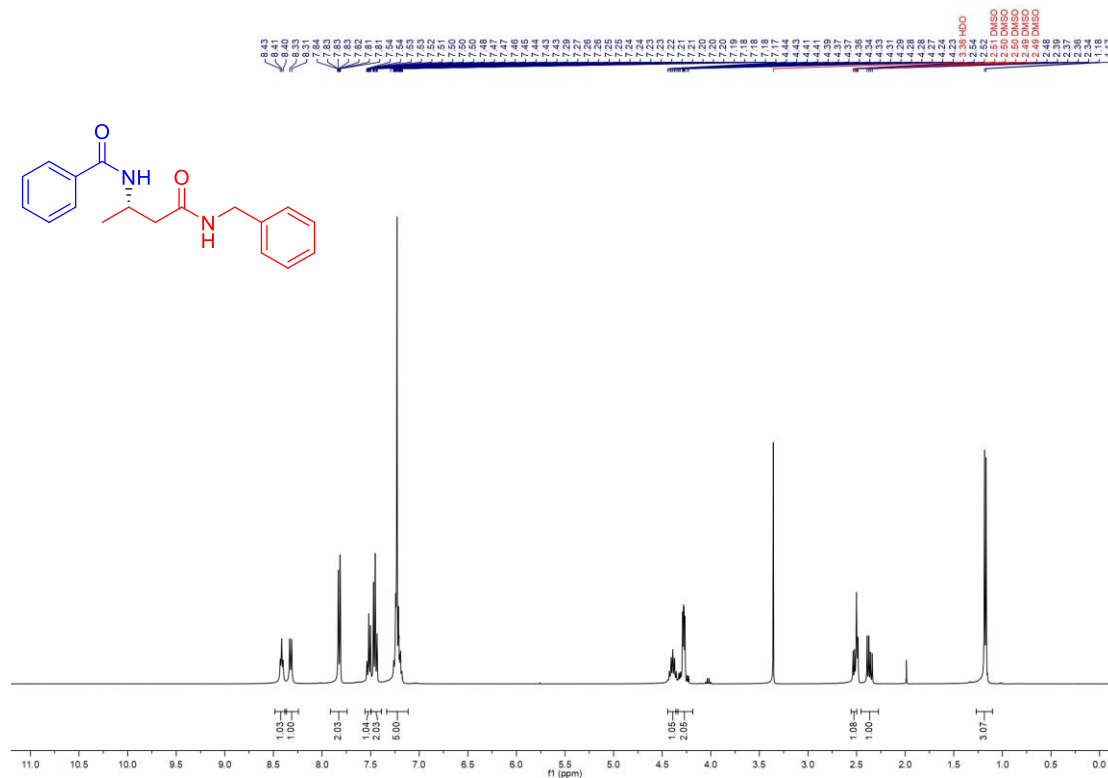

Figure S81.  $^{13}\text{C}$  NMR spectra (100 MHz,  $\text{DMSO}-d_6$ ) of (*S*)-*N*-(4-(Benzylamino)-4-oxobutan-2-yl)benzamide (5ba).

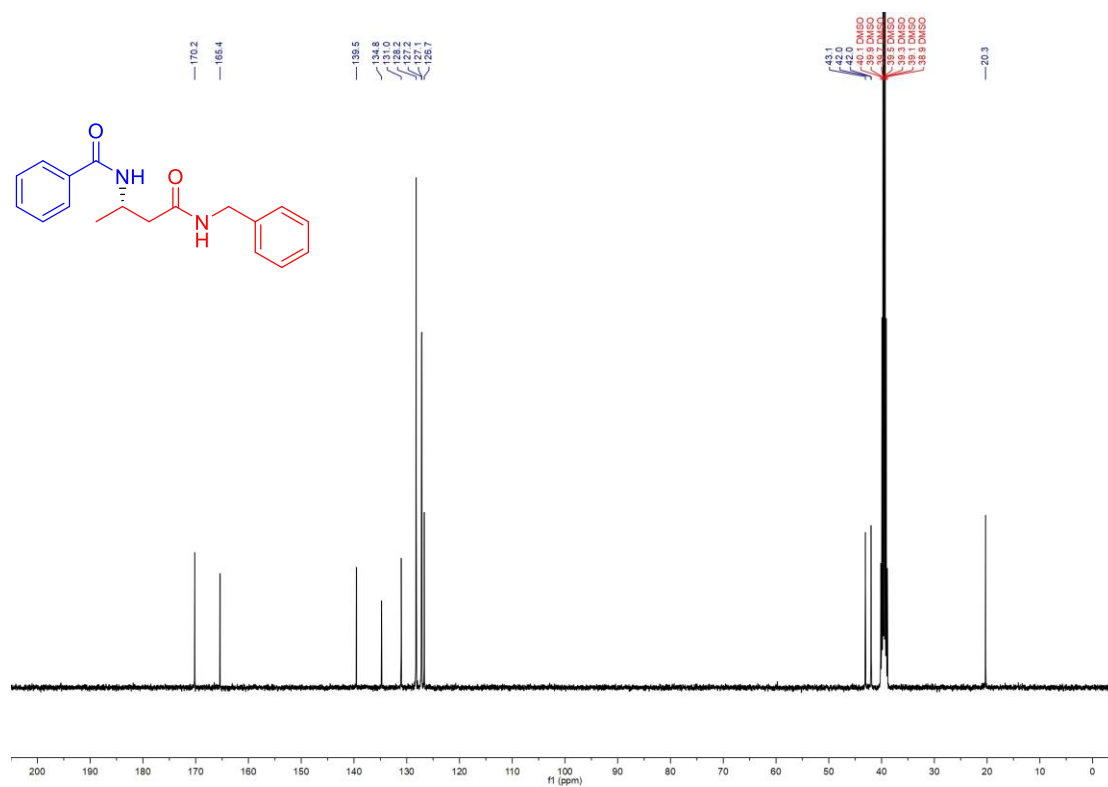

**Figure S82.**  $^1\text{H}$  NMR spectra (400 MHz,  $\text{DMSO-}d_6$ ) of (*S*)-*N*-(1-((4-Methoxyphenyl)amino)-1-oxohexan-3-yl)benzamide (**5ca**)

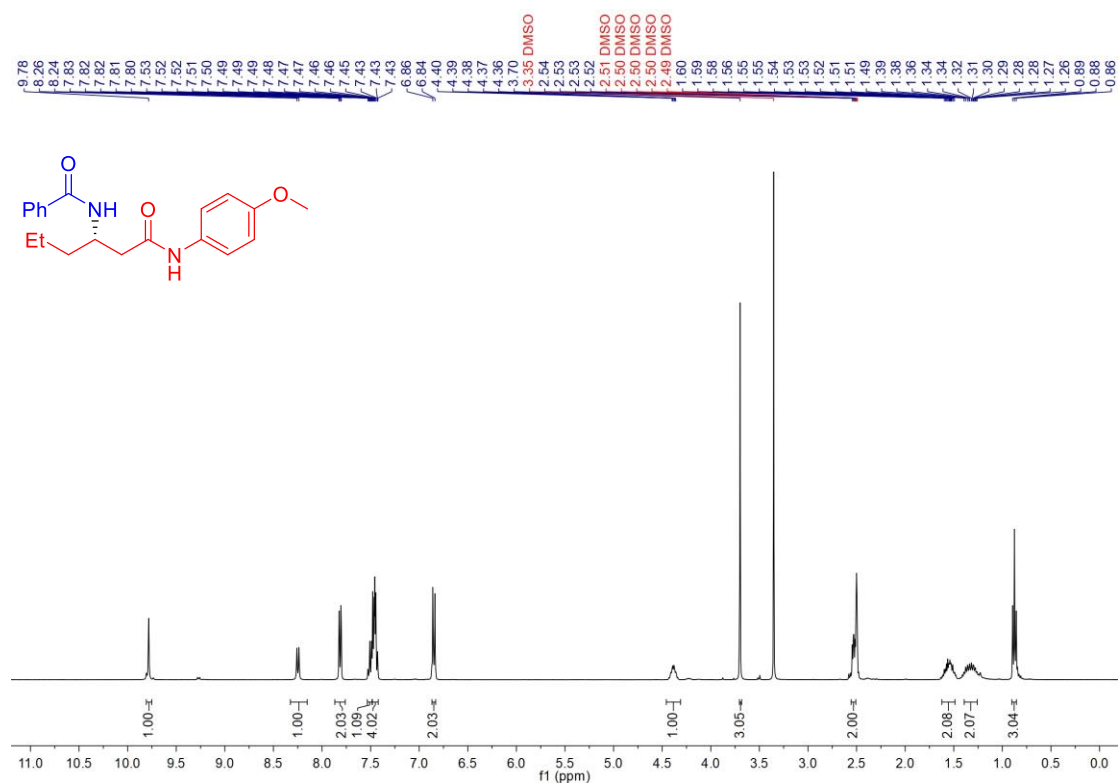

**Figure S83.**  $^{13}\text{C}$  NMR spectra (100 MHz,  $\text{DMSO-}d_6$ ) of (*S*)-*N*-(1-((4-Methoxyphenyl)amino)-1-oxohexan-3-yl)benzamide (**5ca**)

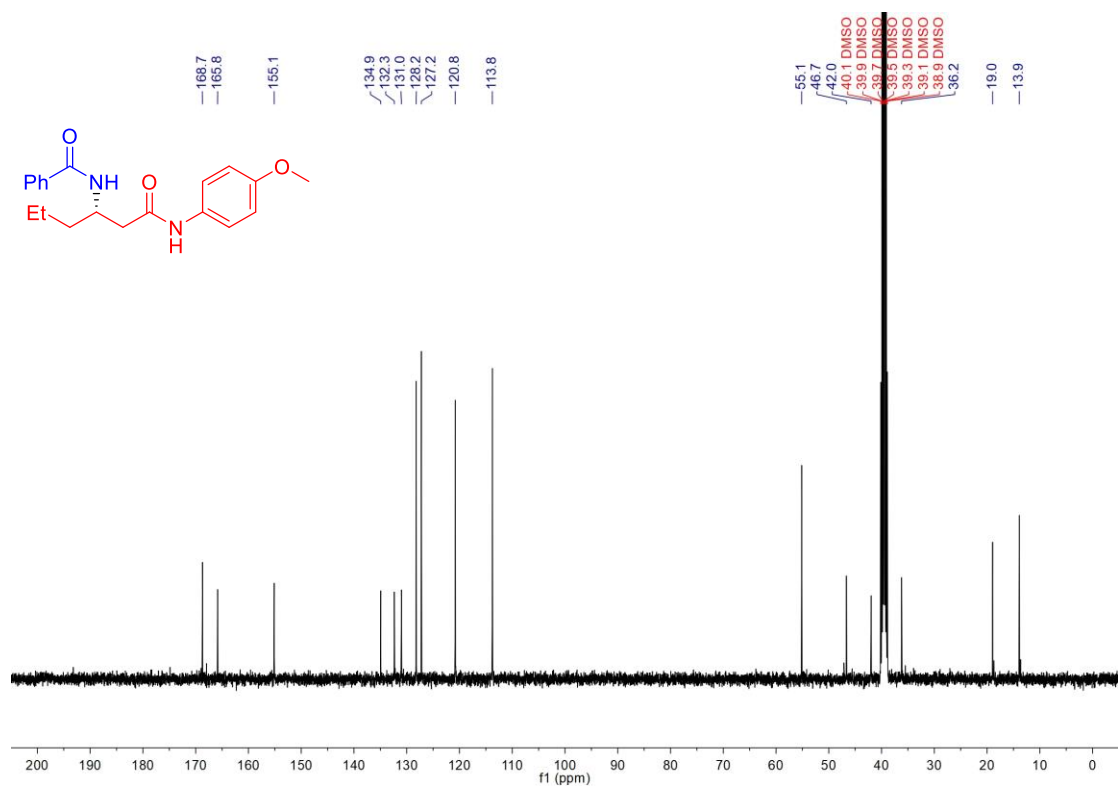

Figure S84  $^1\text{H}$  NMR spectra (400 MHz,  $\text{DMSO}-d_6$ ) of (*S*)-*N*-(1-((4-Methoxyphenyl)amino)-1-oxoheptan-3-yl)benzamide (5da)

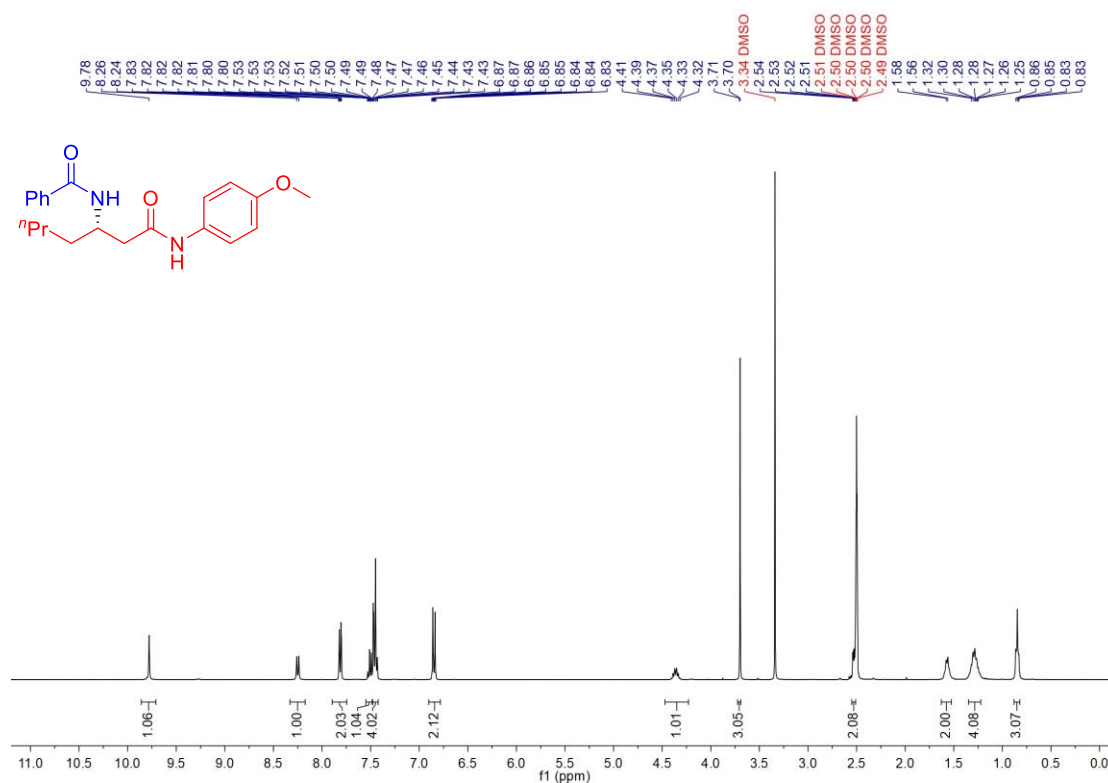

Figure S85.  $^{13}\text{C}$  NMR spectra (100 MHz,  $\text{DMSO}-d_6$ ) of (*S*)-*N*-(1-((4-Methoxyphenyl)amino)-1-oxoheptan-3-yl)benzamide (5da)

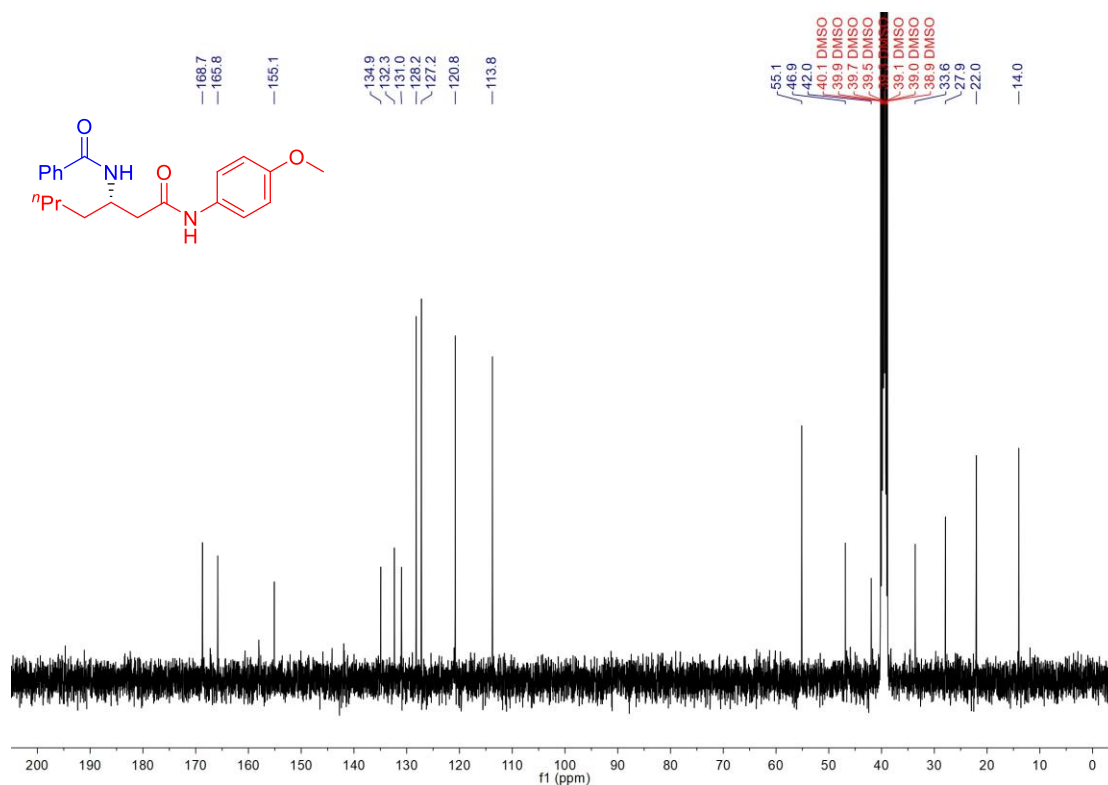

Figure S86.  $^1\text{H}$  NMR spectra (400 MHz,  $\text{DMSO-}d_6$ ) of *N*-((*S*)-1-((*S*)-2-(6-Methoxynaphthalen-2-yl)propanamido)propan-2-yl)benzamide (6).

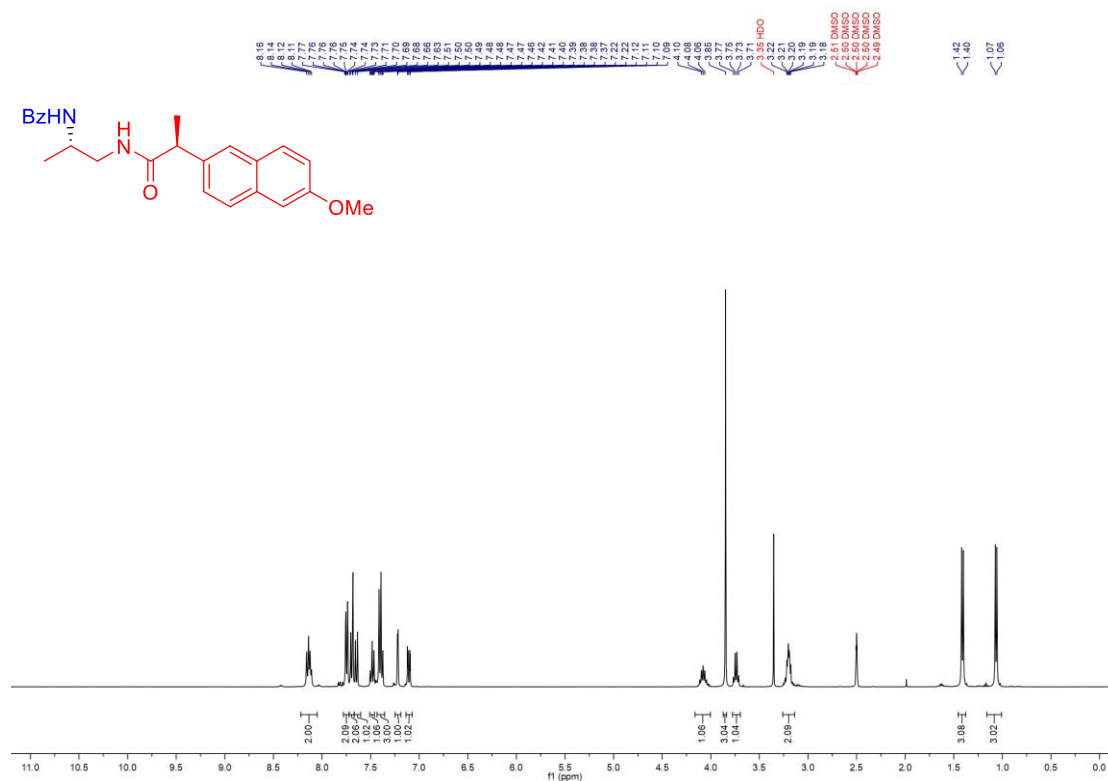

Figure S87.  $^{13}\text{C}$  NMR spectra (100 MHz,  $\text{DMSO-}d_6$ ) of *N*-((*S*)-1-((*S*)-2-(6-Methoxynaphthalen-2-yl)propanamido)propan-2-yl)benzamide (6).

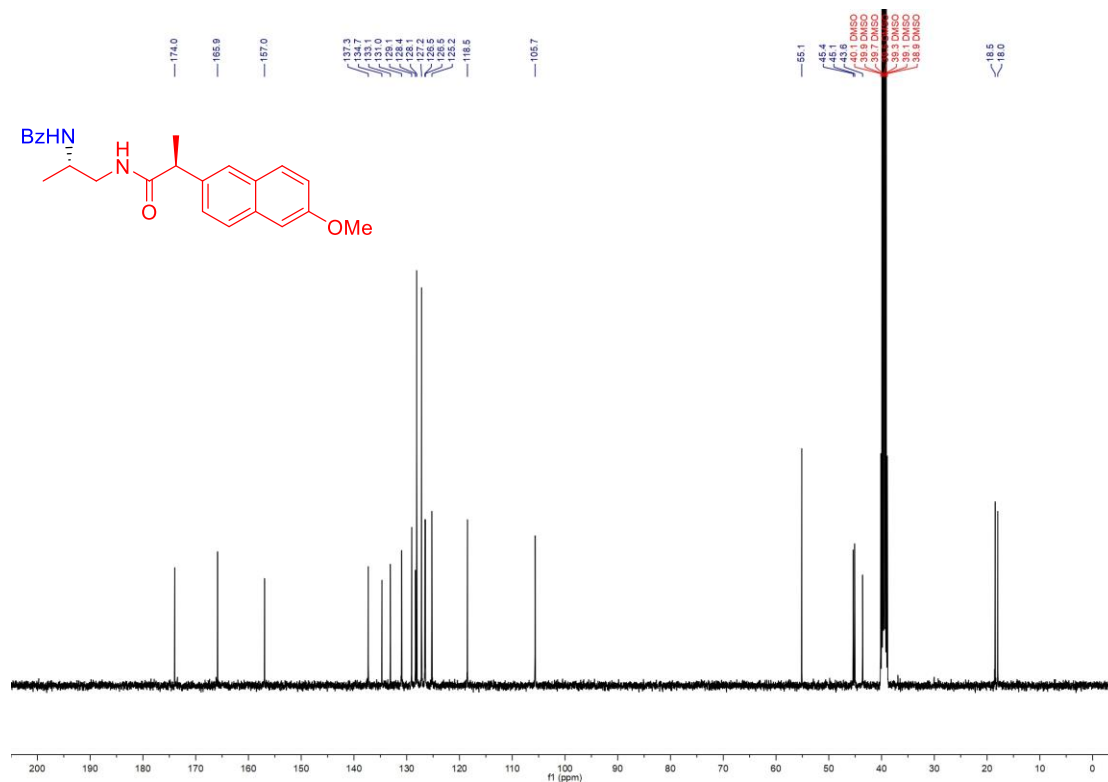

Figure S88.  $^1\text{H}$  NMR spectra (400 MHz,  $\text{DMSO-}d_6$ ) of (*S*)-*N*-(1-(2-(11-oxo-6,11-Dihydrodibenzo[*b,e*]oxepin-3-yl)acetamido)propan-2-yl)benzamide (7).

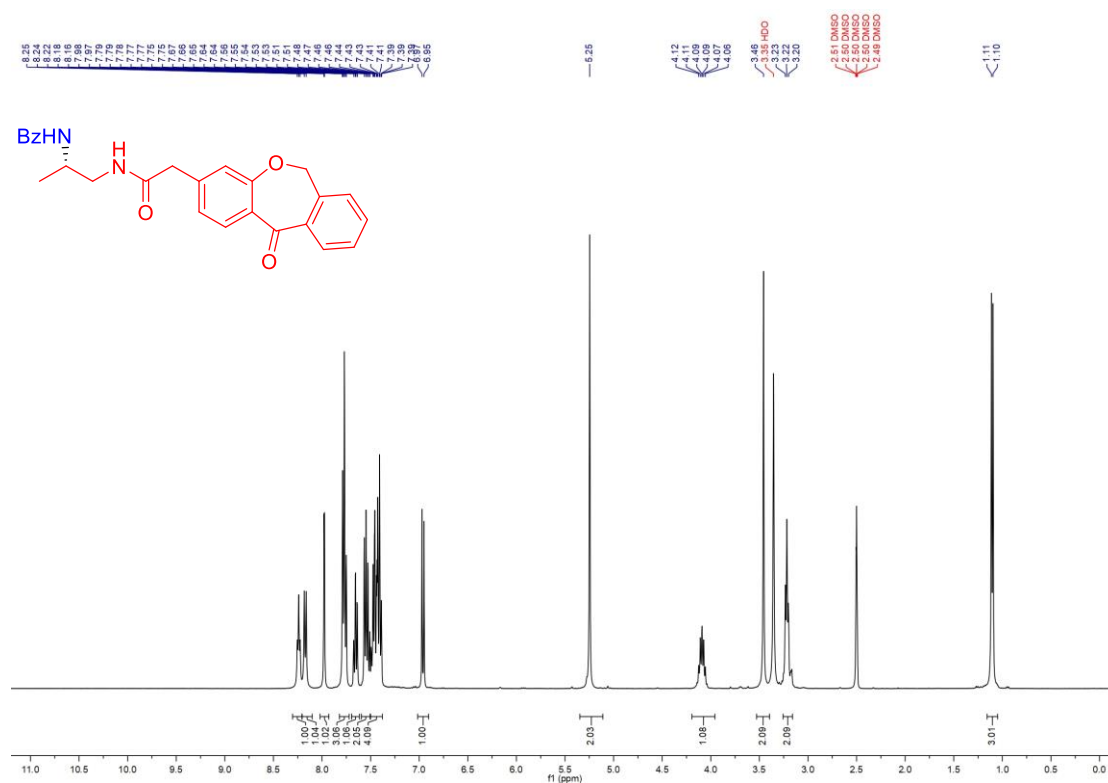

Figure S89.  $^{13}\text{C}$  NMR spectra (100 MHz,  $\text{DMSO-}d_6$ ) of (*S*)-*N*-(1-(2-(11-oxo-6,11-Dihydrodibenzo[*b,e*]oxepin-3-yl)acetamido)propan-2-yl)benzamide (7).

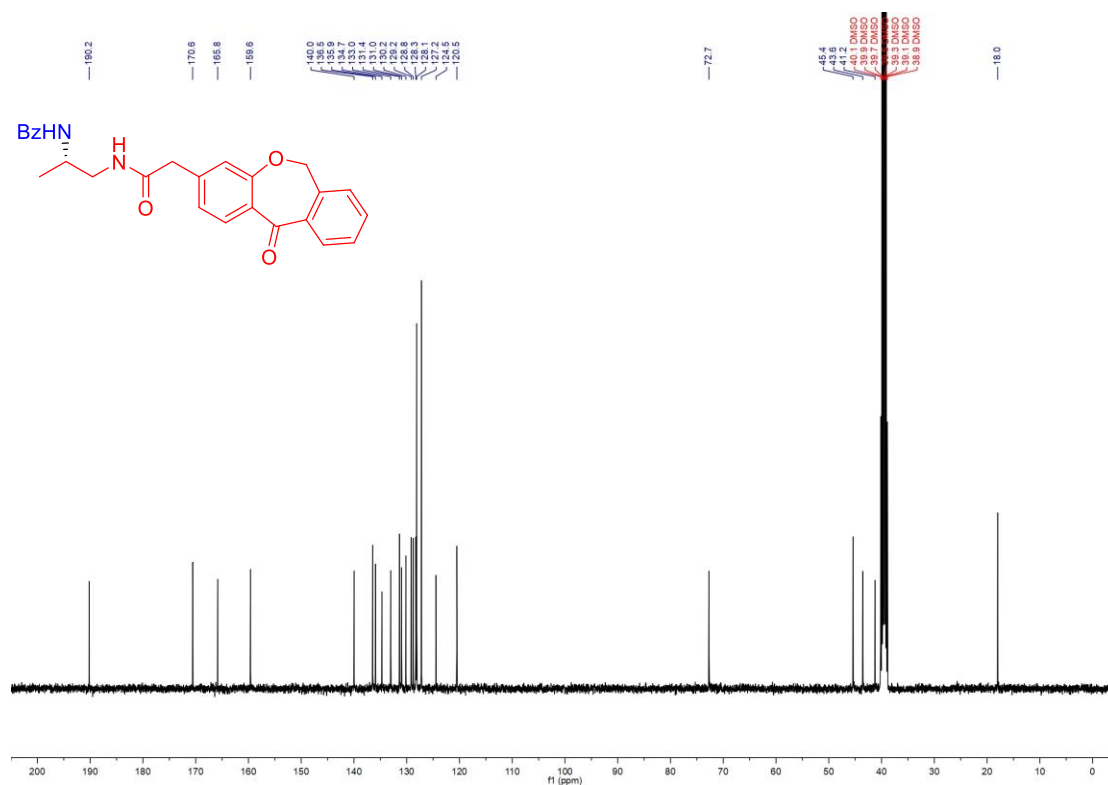

Figure S90.  $^1\text{H}$  NMR spectra (400 MHz,  $\text{DMSO-}d_6$ ) of (*S*)-*N*-(1-(2-(1-(4-Chlorobenzoyl)-5-methoxy-2-methyl-1*H*-indol-3-yl)acetamido)propan-2-yl)benzamide (8).

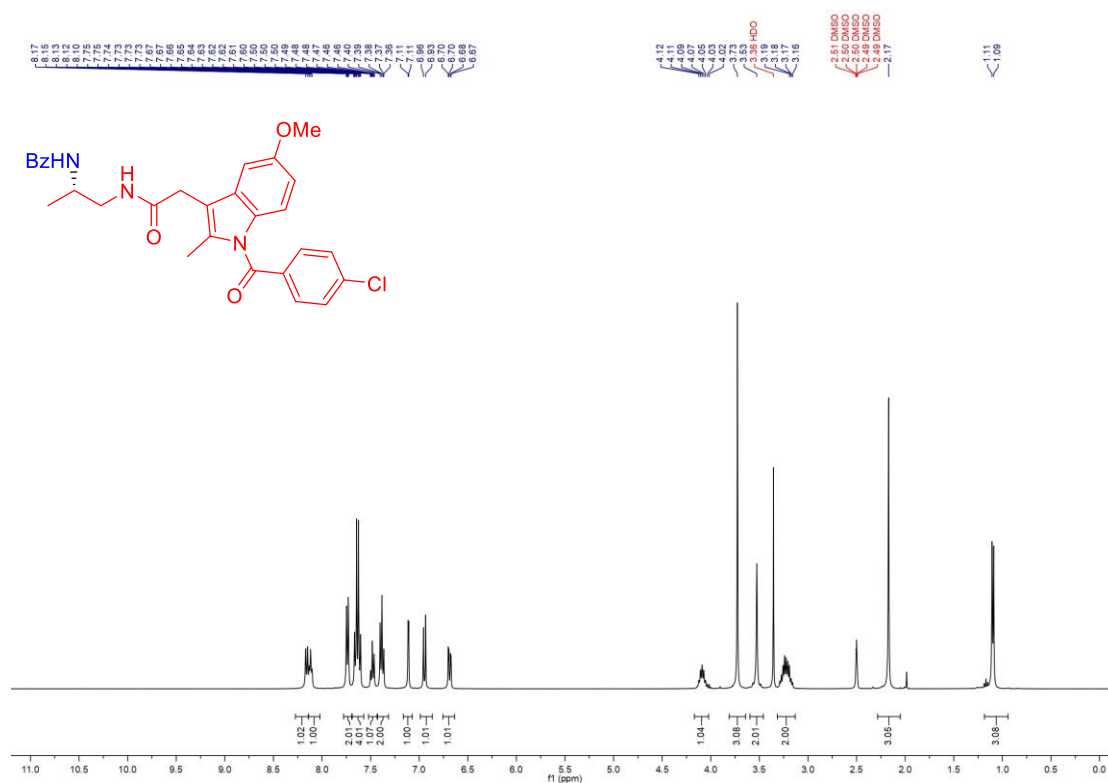

Figure S91.  $^{13}\text{C}$  NMR spectra (100 MHz,  $\text{DMSO-}d_6$ ) of (*S*)-*N*-(1-(2-(1-(4-Chlorobenzoyl)-5-methoxy-2-methyl-1*H*-indol-3-yl)acetamido)propan-2-yl)benzamide (8).

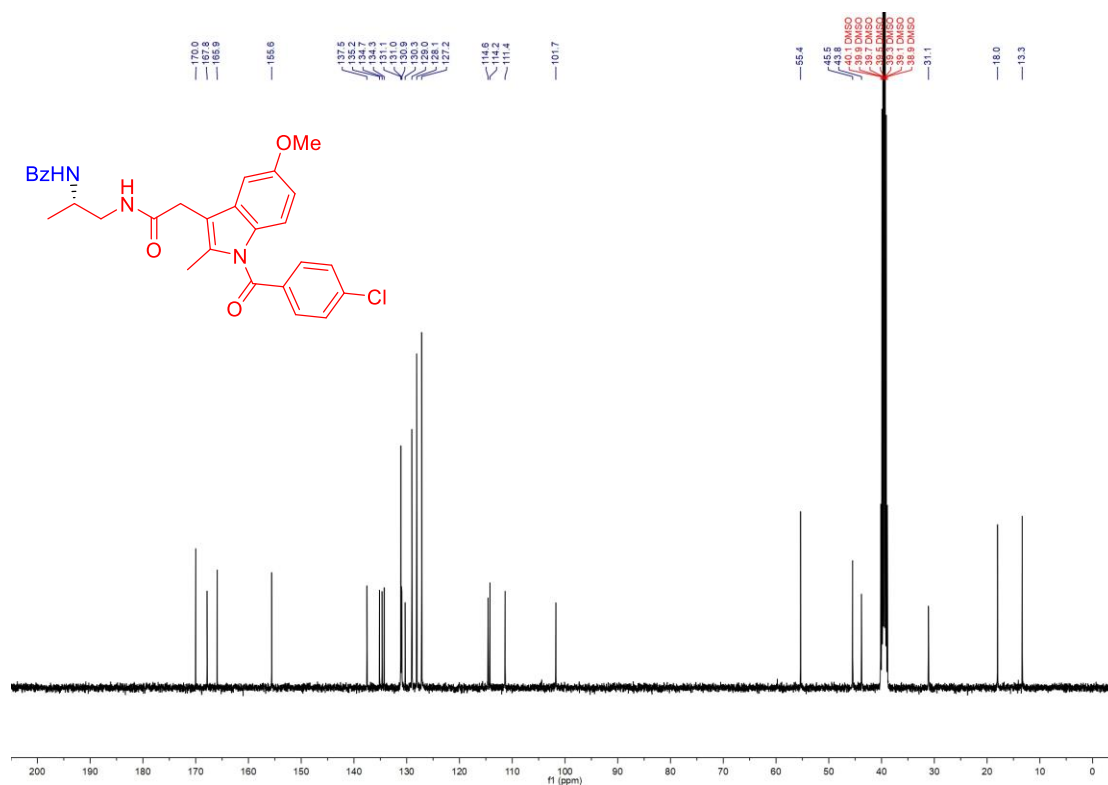

Figure S92.  $^1\text{H}$  NMR spectra (400 MHz,  $\text{DMSO-}d_6$ ) of (*S*)-2-((2-(4-Methoxybenzamido)propyl)carbamoyl)phenyl acetate (9).

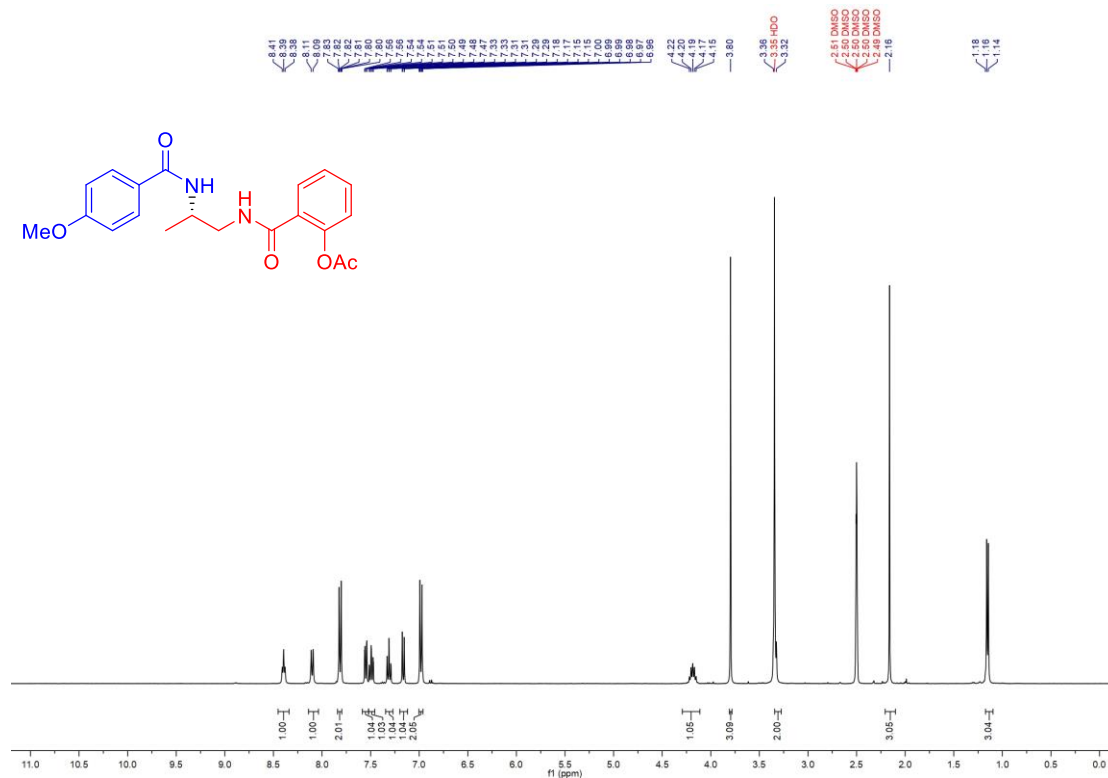

Figure S93.  $^{13}\text{C}$  NMR spectra (100 MHz,  $\text{DMSO-}d_6$ ) of (*S*)-2-((2-(4-Methoxybenzamido)propyl)carbamoyl)phenyl acetate (9).

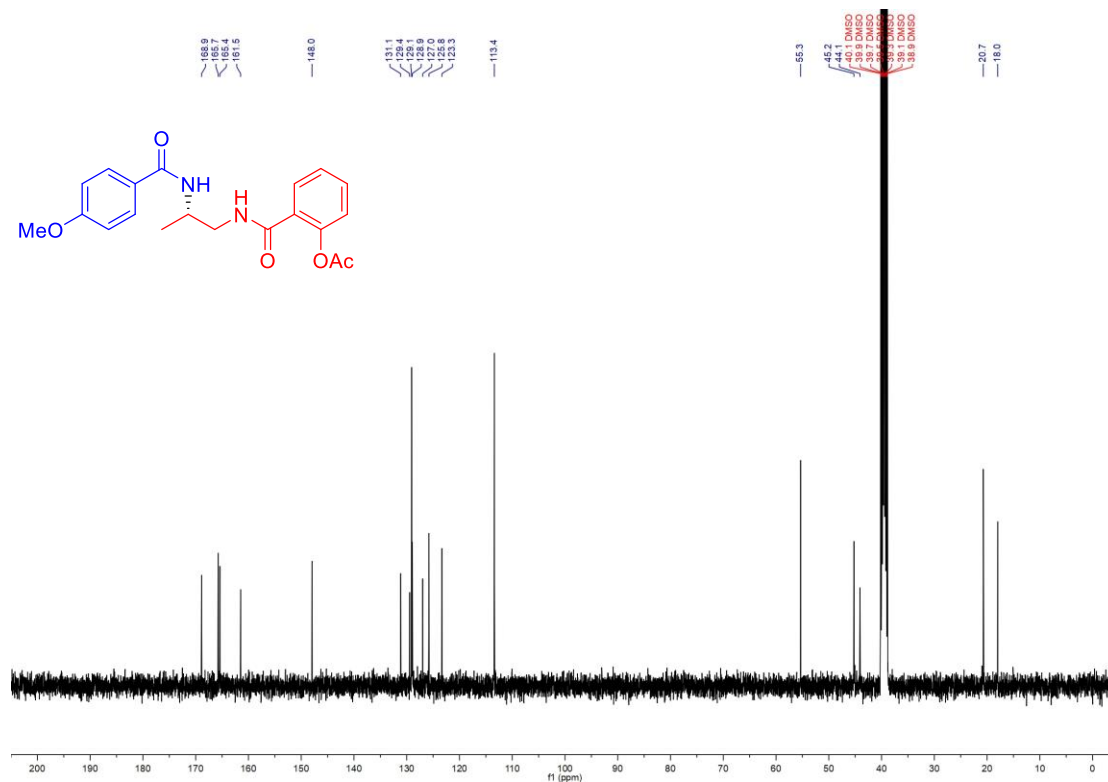

Figure S94.  $^1\text{H}$  NMR spectra (400 MHz,  $\text{DMSO-}d_6$ ) of (*S*)-3-(3-(4,5-Diphenyloxazol-2-yl)propanamido)-*N*-(4-methoxyphenyl)butanamide (10).

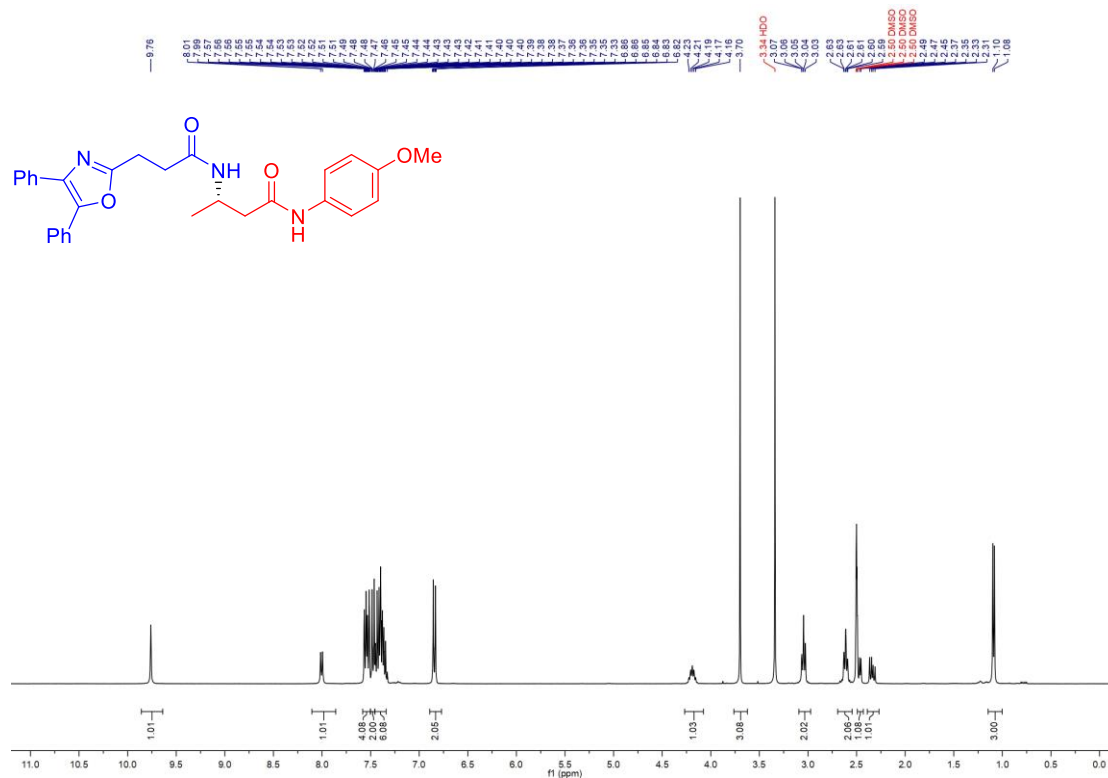

Figure S95.  $^{13}\text{C}$  NMR spectra (100 MHz,  $\text{DMSO-}d_6$ ) of (*S*)-3-(3-(4,5-Diphenyloxazol-2-yl)propanamido)-*N*-(4-methoxyphenyl)butanamide (10).

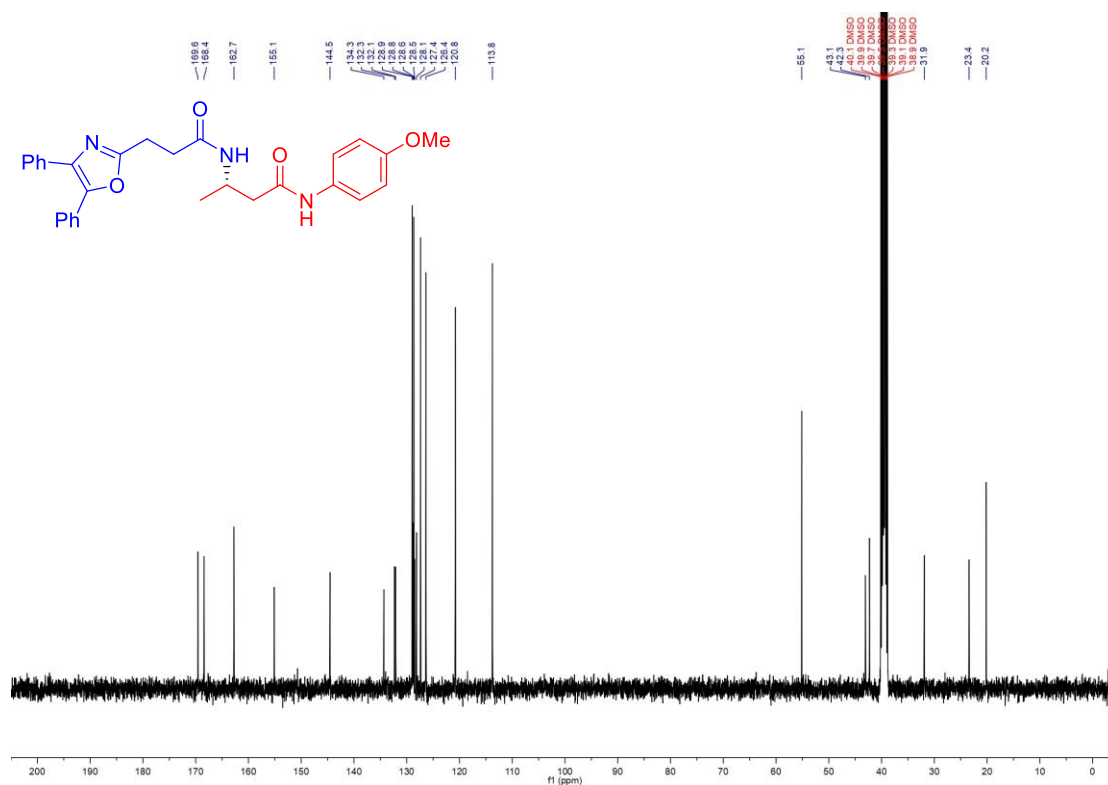

Figure S96.  $^1\text{H}$  NMR spectra (400 MHz,  $\text{DMSO}-d_6$ ) of (*S*)-3-((*S*)-2-(4-Isobutylphenyl)propanamido)-*N*-(4-methoxyphenyl)butanamide (11).

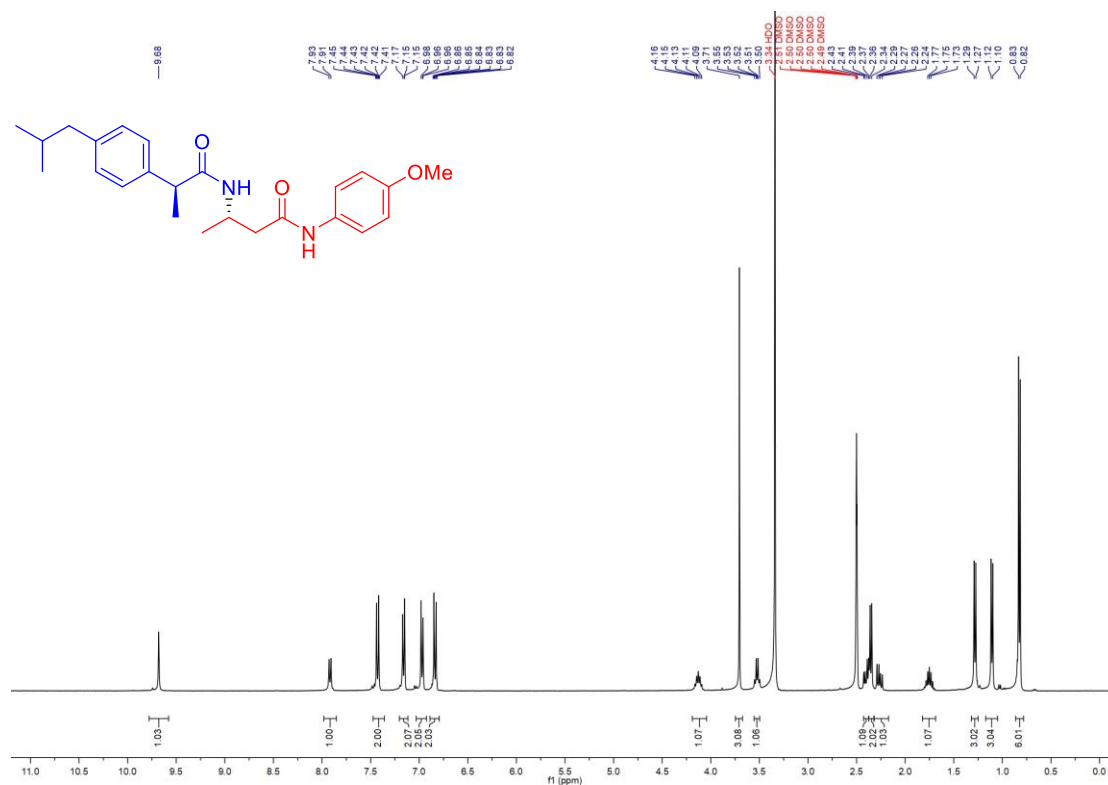

Figure S97.  $^{13}\text{C}$  NMR spectra (100 MHz,  $\text{DMSO}-d_6$ ) of (*S*)-3-((*S*)-2-(4-Isobutylphenyl)propanamido)-*N*-(4-methoxyphenyl)butanamide (11).

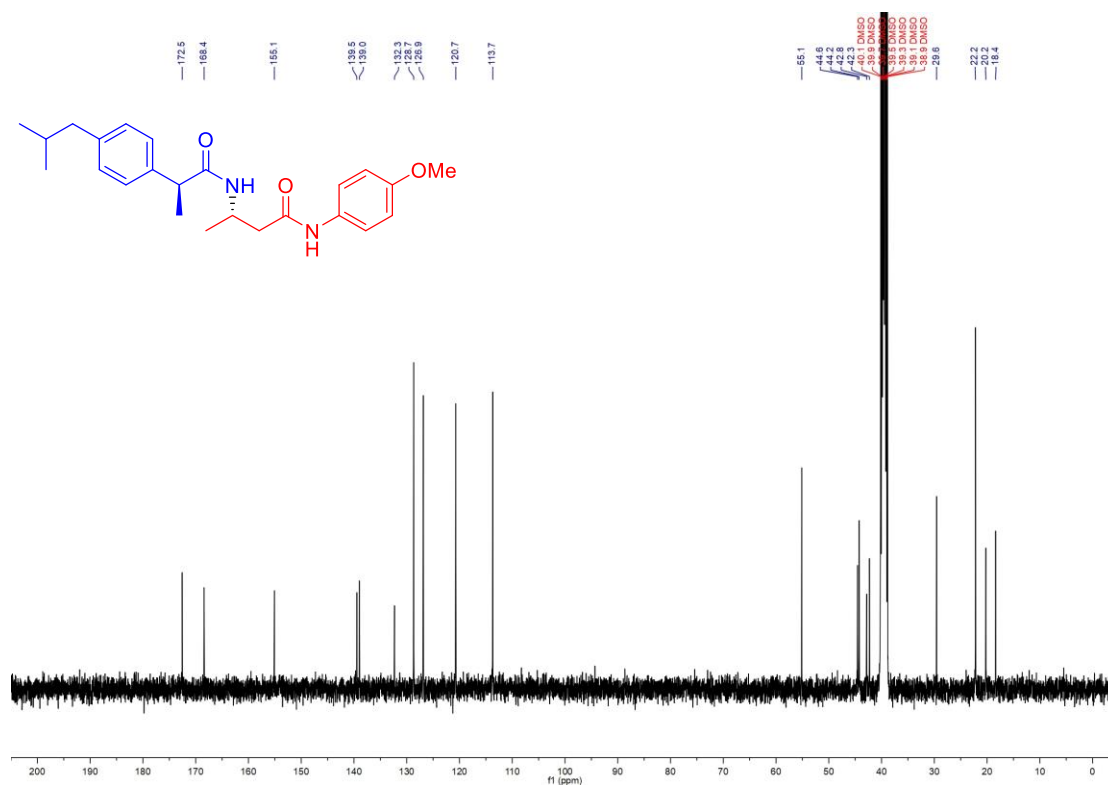

Figure S98.  $^1\text{H}$  NMR spectra (400 MHz,  $\text{DMSO}-d_6$ ) of (*S*)-*N,N'*-(Propane-1,2-diyl)dinicotinamide ((*S*)-Nicaraven).

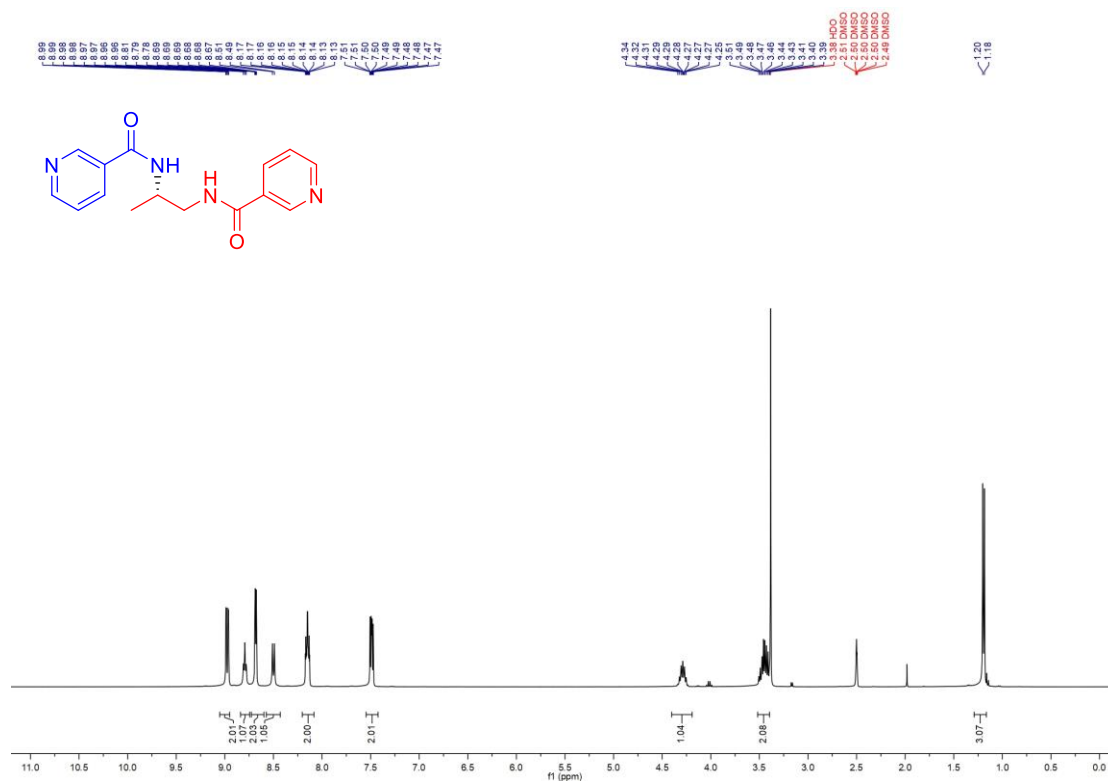

Figure S99.  $^{13}\text{C}$  NMR spectra (100 MHz,  $\text{DMSO}-d_6$ ) of (*S*)-*N,N'*-(Propane-1,2-diyl)dinicotinamide ((*S*)-Nicaraven).

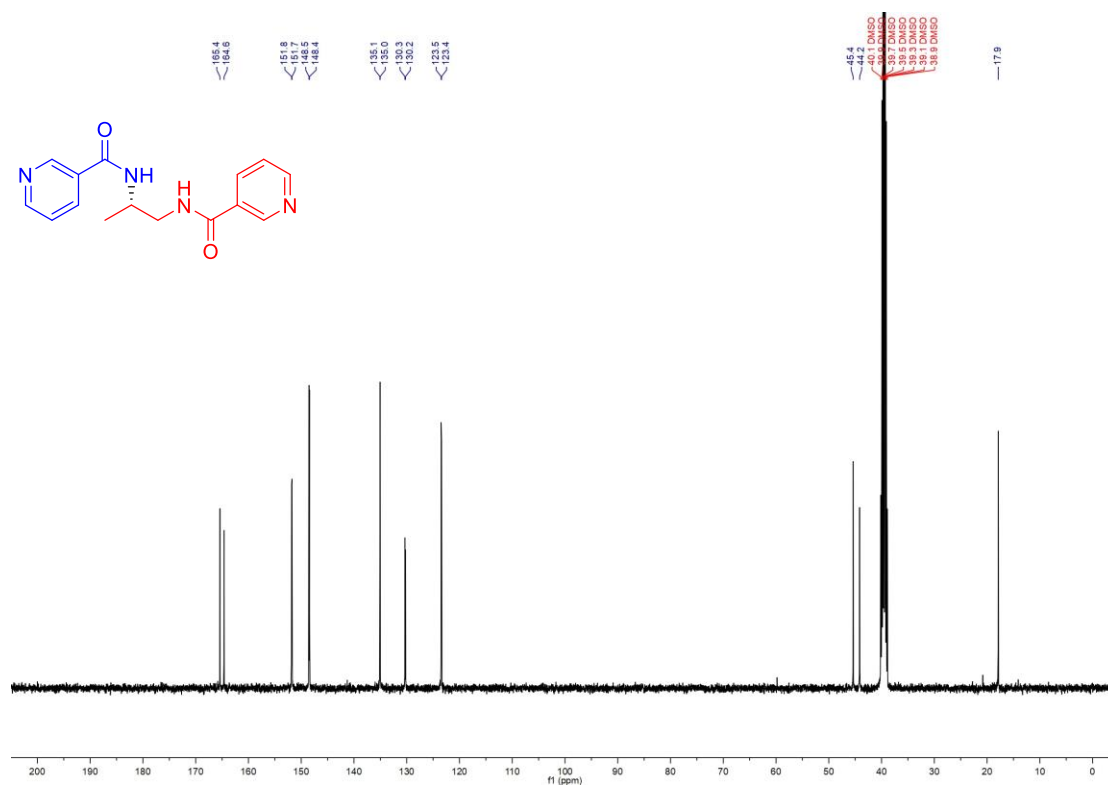

Figure S100.  $^1\text{H}$  NMR spectra (400 MHz, Deuterium Oxide) of (2*S*,3*S*)-1-Phenylbutane-2,3-diaminium chloride (12).

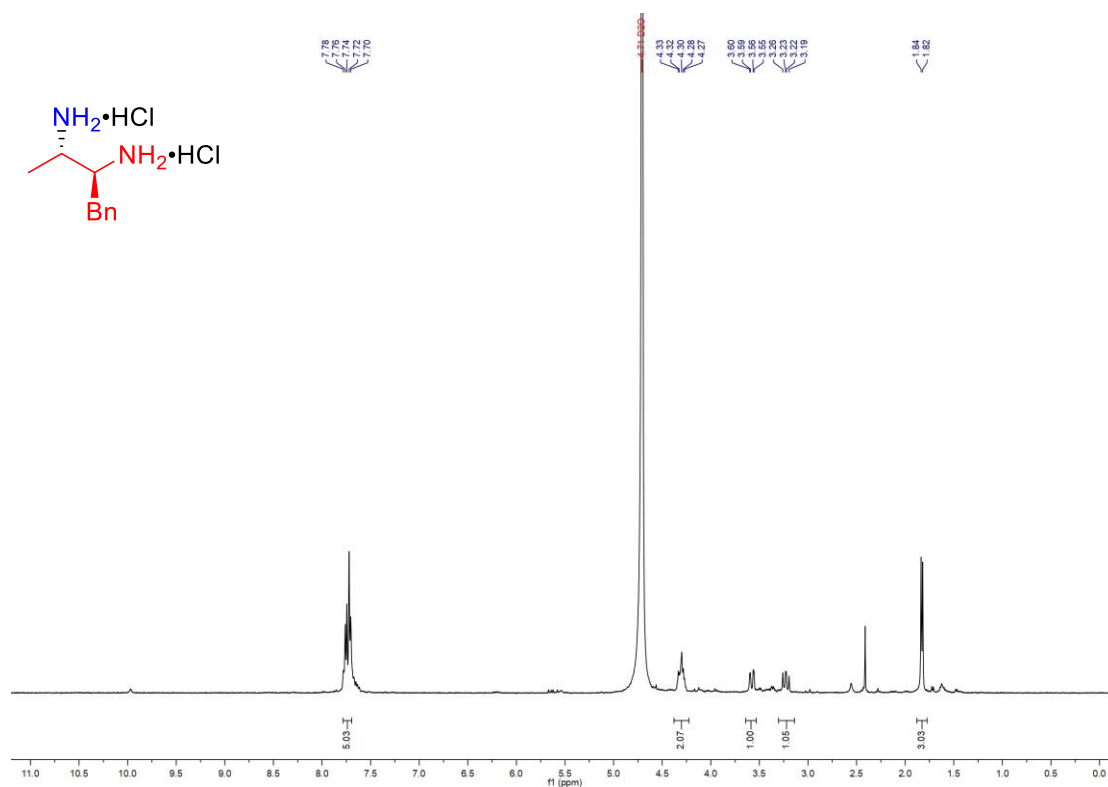

Figure S101.  $^{13}\text{C}$  NMR spectra (400 MHz, Deuterium Oxide) of (2*S*,3*S*)-1-Phenylbutane-2,3-diaminium chloride (12).

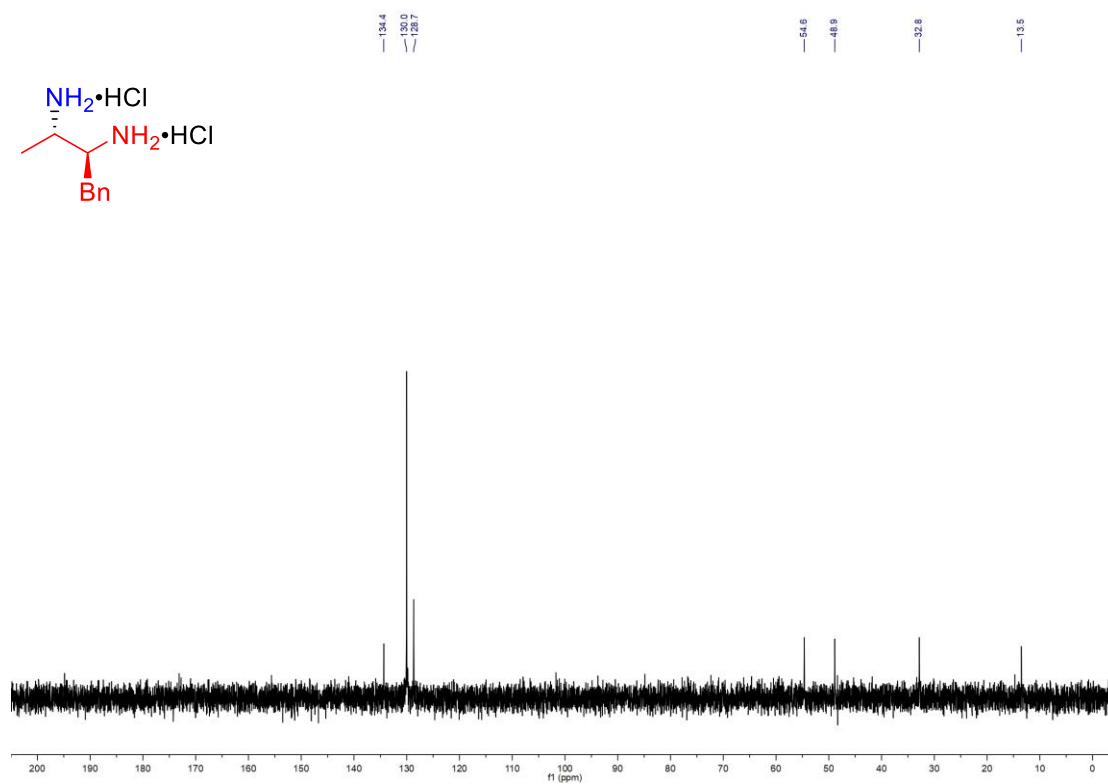

## HPLC spectra of the products

Figure S102. HPLC Chromatography of the Racemic *N*-(2-Benzamidopropyl)-4-methoxybenzamide (3aa).

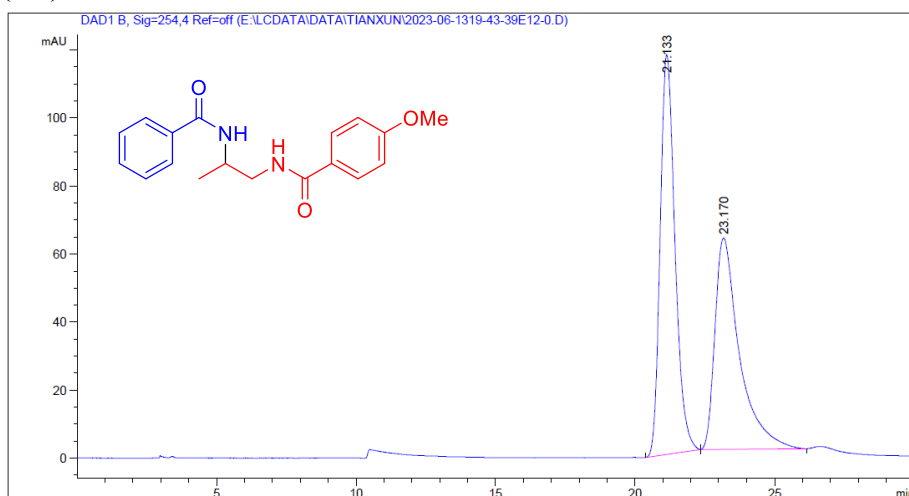

Signal 1: DAD1 B, Sig=254,4 Ref=off

| Peak # | RetTime [min] | Type | Width [min] | Area [mAU*s] | Height [mAU] | Area %  |
|--------|---------------|------|-------------|--------------|--------------|---------|
| 1      | 21.133        | BB   | 0.5700      | 4329.34131   | 117.47626    | 53.4047 |
| 2      | 23.170        | BB   | 0.8836      | 3777.32813   | 62.10092     | 46.5953 |

Totals : 8106.66943 179.57718

Figure S103. HPLC Chromatography of (*S*)-*N*-(2-Benzamidopropyl)-4-methoxybenzamide (3aa).

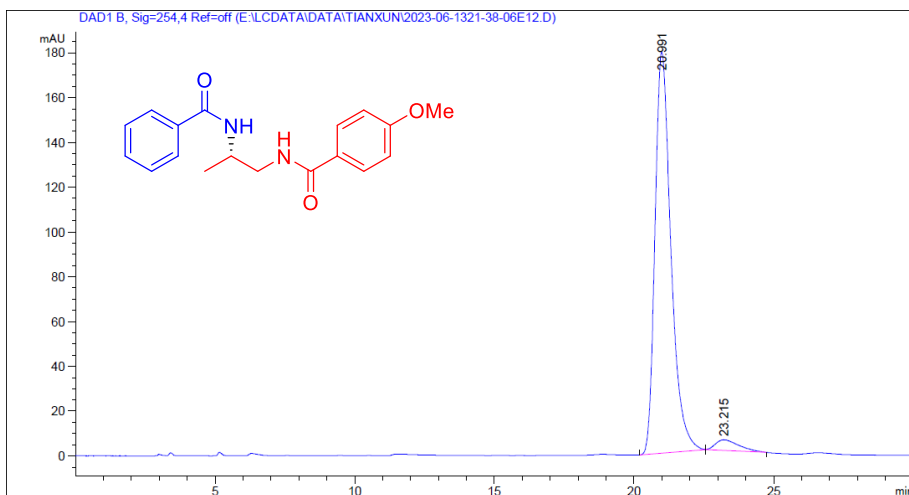

Signal 1: DAD1 B, Sig=254,4 Ref=off

| Peak # | RetTime [min] | Type | Width [min] | Area [mAU*s] | Height [mAU] | Area %  |
|--------|---------------|------|-------------|--------------|--------------|---------|
| 1      | 20.991        | BB   | 0.6023      | 7098.85742   | 179.14470    | 96.3106 |
| 2      | 23.215        | BBA  | 0.6946      | 271.93640    | 4.67494      | 3.6894  |

Totals : 7370.79382 183.81964

**Figure S104. HPLC Chromatography of the Racemic *N*-(1-(4-Methoxybenzamido)propan-2-yl)-2-methylbenzamide (3ab).**

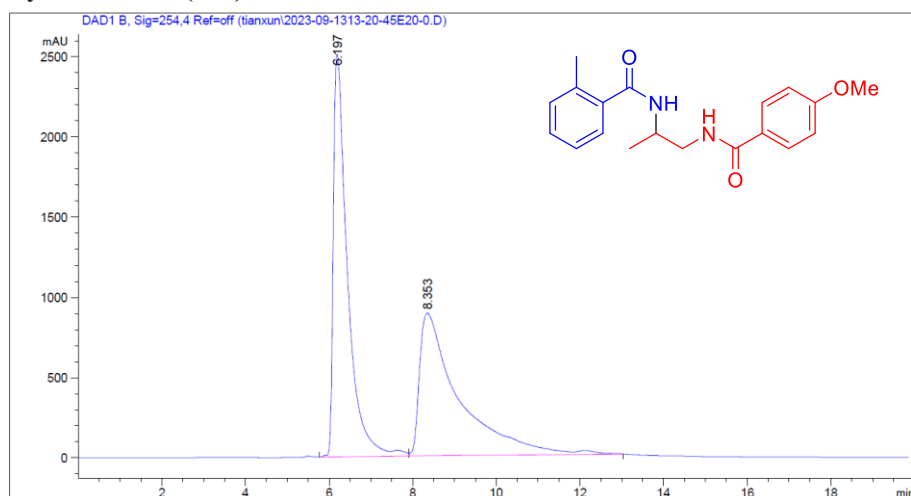

Signal 1: DAD1 B, Sig=254,4 Ref=off

| Peak # | RetTime [min] | Type | Width [min] | Area [mAU*s] | Height [mAU] | Area %  |
|--------|---------------|------|-------------|--------------|--------------|---------|
| 1      | 6.197         | BV R | 0.3290      | 5.91690e4    | 2509.68164   | 50.2855 |
| 2      | 8.353         | VV R | 0.9014      | 5.84972e4    | 890.25616    | 49.7145 |

Totals : 1.17666e5 3399.93781

**Figure S105. HPLC Chromatography of (*S*)-*N*-(1-(4-Methoxybenzamido)propan-2-yl)-2-methylbenzamide (3ab).**

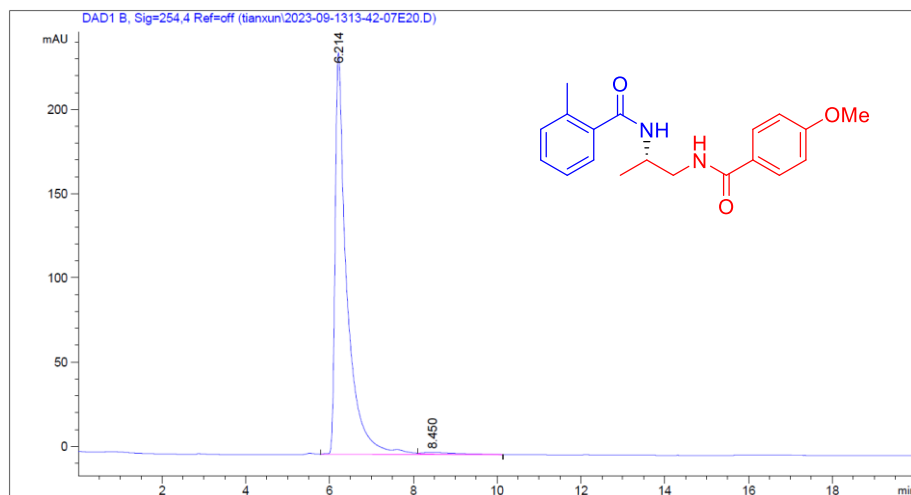

Signal 1: DAD1 B, Sig=254,4 Ref=off

| Peak # | RetTime [min] | Type | Width [min] | Area [mAU*s] | Height [mAU] | Area %  |
|--------|---------------|------|-------------|--------------|--------------|---------|
| 1      | 6.214         | BV R | 0.2696      | 4639.98486   | 238.41887    | 98.6727 |
| 2      | 8.450         | VBAE | 0.6939      | 62.41358     | 1.09343      | 1.3273  |

Totals : 4702.39845 239.51230

**Figure S106. HPLC Chromatography of the Racemic 2-Methoxy-*N*-(1-(4-methoxybenzamido)propan-2-yl)benzamide (3ac).**

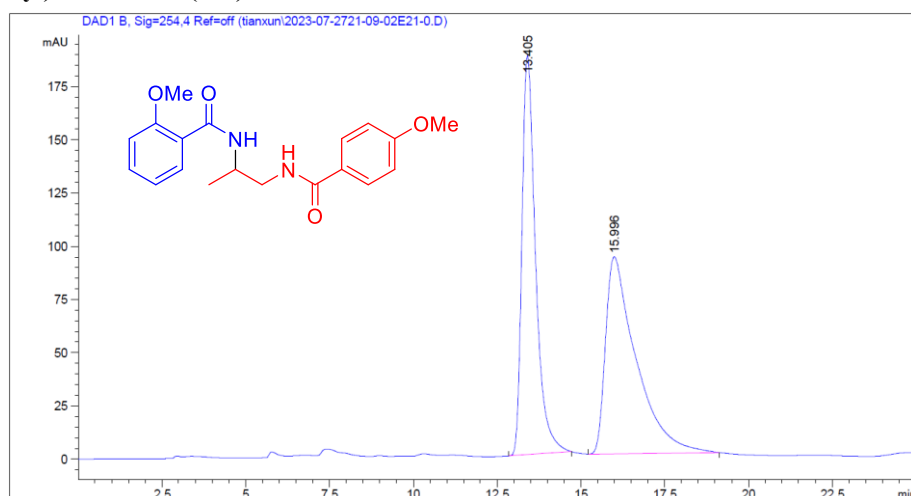

Signal 1: DAD1 B, Sig=254,4 Ref=off

| Peak # | RetTime [min] | Type | Width [min] | Area [mAU*s] | Height [mAU] | Area %  |
|--------|---------------|------|-------------|--------------|--------------|---------|
| 1      | 13.405        | BBA  | 0.4275      | 5296.34326   | 187.55377    | 47.4452 |
| 2      | 15.996        | BBA  | 0.8893      | 5866.73584   | 92.58383     | 52.5548 |

Totals : 1.11631e4 280.13760

**Figure S107. HPLC Chromatography of (*S*)-2-Methoxy-*N*-(1-(4-methoxybenzamido)propan-2-yl)benzamide (3ac).**

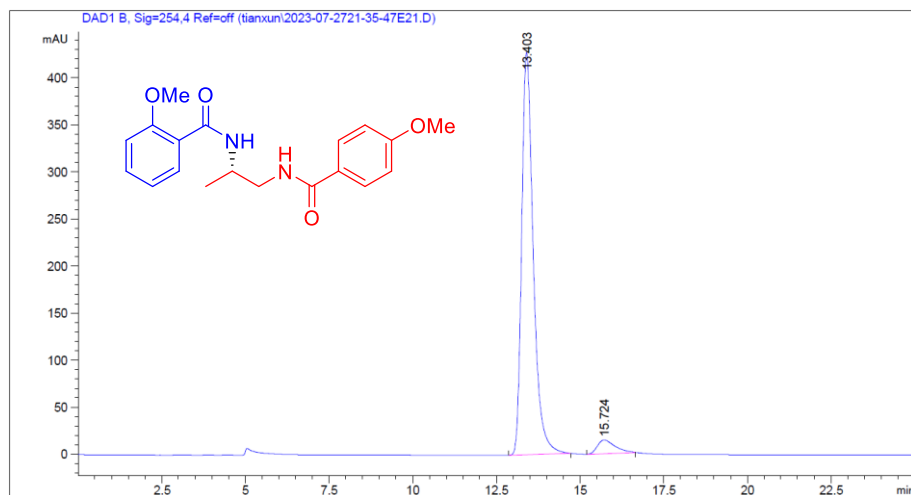

Signal 1: DAD1 B, Sig=254,4 Ref=off

| Peak # | RetTime [min] | Type | Width [min] | Area [mAU*s] | Height [mAU] | Area %  |
|--------|---------------|------|-------------|--------------|--------------|---------|
| 1      | 13.403        | BBA  | 0.3647      | 1.02842e4    | 427.38065    | 95.0796 |
| 2      | 15.724        | BBA  | 0.5428      | 532.21387    | 14.54898     | 4.9204  |

Totals : 1.08164e4 441.92963

**Figure S108. HPLC Chromatography of the Racemic *N*-(1-(4-Methoxybenzamido)propan-2-yl)-3-methylbenzamide (3ad).**

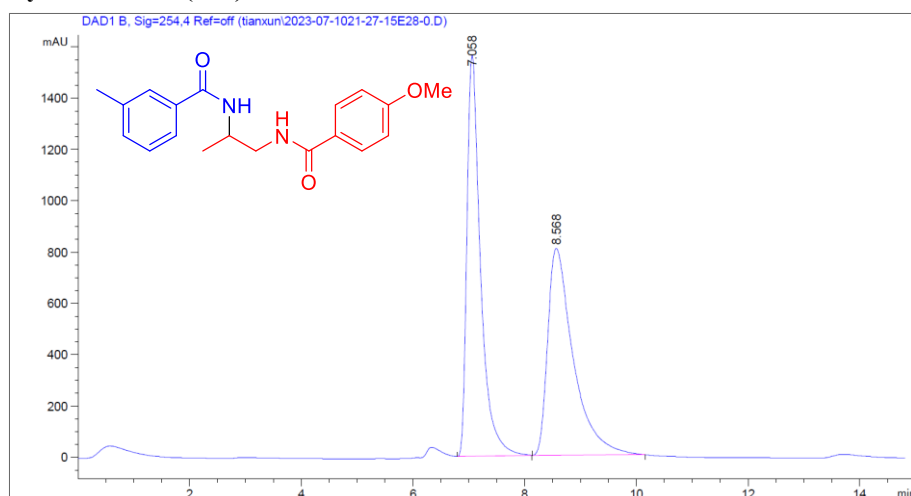

Signal 1: DAD1 B, Sig=254,4 Ref=off

| Peak # | RetTime [min] | Type | Width [min] | Area [mAU*s] | Height [mAU] | Area %  |
|--------|---------------|------|-------------|--------------|--------------|---------|
| 1      | 7.058         | BB   | 0.2556      | 2.64628e4    | 1562.72876   | 50.8285 |
| 2      | 8.568         | BBA  | 0.4687      | 2.56001e4    | 805.79364    | 49.1715 |

Totals : 5.20629e4 2368.52240

**Figure S109. HPLC Chromatography of (*S*)-*N*-(1-(4-Methoxybenzamido)propan-2-yl)-3-methylbenzamide (3ad).**

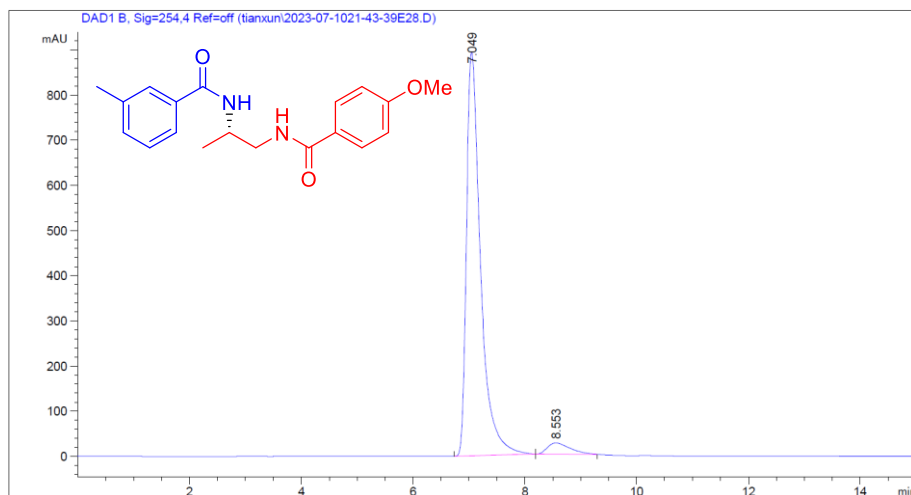

Signal 1: DAD1 B, Sig=254,4 Ref=off

| Peak # | RetTime [min] | Type | Width [min] | Area [mAU*s] | Height [mAU] | Area %  |
|--------|---------------|------|-------------|--------------|--------------|---------|
| 1      | 7.049         | BB   | 0.2615      | 1.55910e4    | 894.00549    | 95.7676 |
| 2      | 8.553         | BBA  | 0.4224      | 689.02948    | 24.78358     | 4.2324  |

Totals : 1.62801e4 918.78908

**Figure S110. HPLC Chromatography of the Racemic 3-Methoxy-*N*-(1-(4-methoxybenzamido)propan-2-yl)benzamide (3ae).**

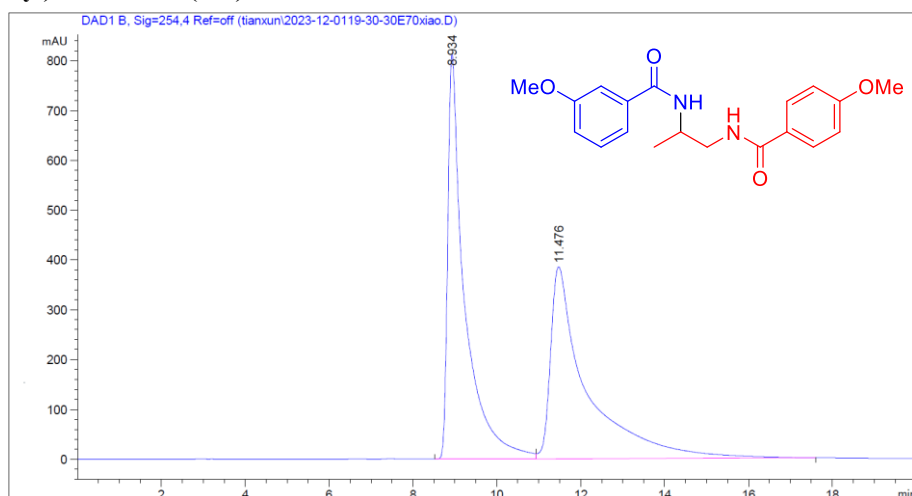

Signal 1: DAD1 B, Sig=254,4 Ref=off

| Peak # | RetTime [min] | Type | Width [min] | Area [mAU*s] | Height [mAU] | Area %  |
|--------|---------------|------|-------------|--------------|--------------|---------|
| 1      | 8.934         | BV   | 0.3832      | 2.26260e4    | 811.68036    | 49.4229 |
| 2      | 11.476        | VB   | 0.8068      | 2.31544e4    | 385.46683    | 50.5771 |

Totals : 4.57804e4 1197.14719

**Figure S111. HPLC Chromatography of (*S*)-3-Methoxy-*N*-(1-(4-methoxybenzamido)propan-2-yl)benzamide (3ae).**

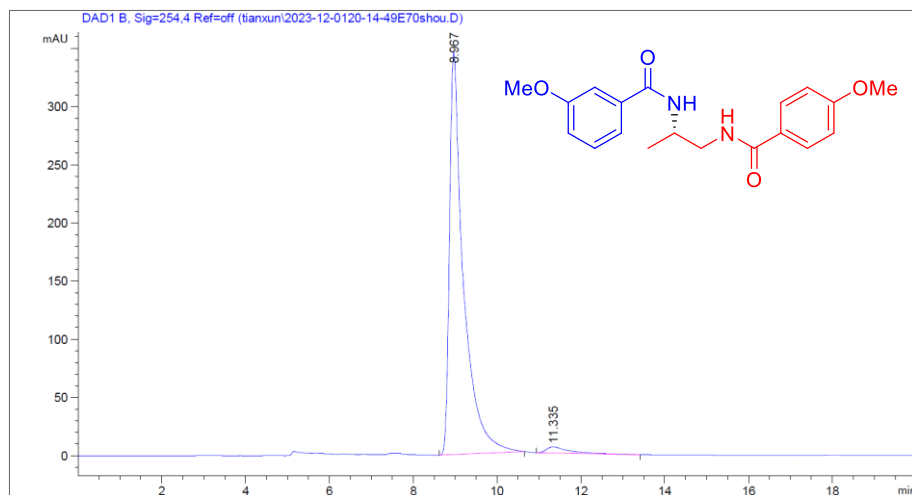

Signal 1: DAD1 B, Sig=254,4 Ref=off

| Peak # | RetTime [min] | Type | Width [min] | Area [mAU*s] | Height [mAU] | Area %  |
|--------|---------------|------|-------------|--------------|--------------|---------|
| 1      | 8.967         | BBA  | 0.3237      | 7990.33740   | 345.63705    | 97.6094 |
| 2      | 11.335        | BBA  | 0.5238      | 195.69550    | 5.23842      | 2.3906  |

Totals : 8186.03290 350.87548

**Figure S112. HPLC Chromatography of the Racemic 4-(*tert*-Butyl)-*N*-(1-(4-methoxybenzamido)propan-2-yl)benzamide (3af).**

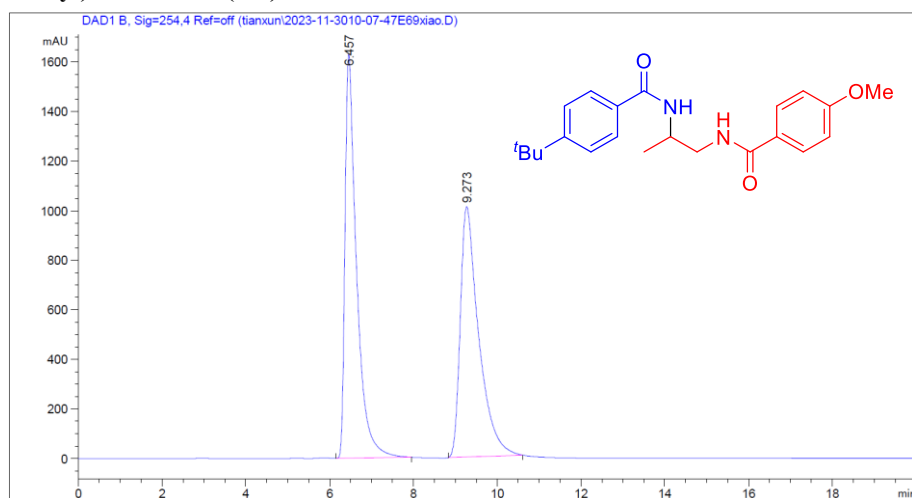

Signal 1: DAD1 B, Sig=254,4 Ref=off

| Peak # | RetTime [min] | Type | Width [min] | Area [mAU*s] | Height [mAU] | Area %  |
|--------|---------------|------|-------------|--------------|--------------|---------|
| 1      | 6.457         | BBA  | 0.2732      | 3.11727e4    | 1629.38794   | 50.3644 |
| 2      | 9.273         | BBA  | 0.4387      | 3.07216e4    | 1010.57623   | 49.6356 |

Totals : 6.18944e4 2639.96417

**Figure S113. HPLC Chromatography of (*S*)-4-(*tert*-Butyl)-*N*-(1-(4-methoxybenzamido)propan-2-yl)benzamide (3af).**

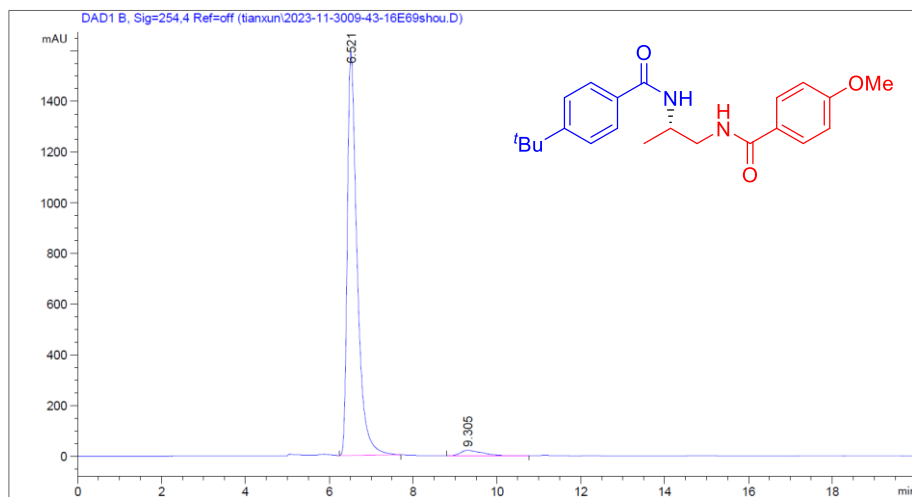

Signal 1: DAD1 B, Sig=254,4 Ref=off

| Peak # | RetTime [min] | Type | Width [min] | Area [mAU*s] | Height [mAU] | Area %  |
|--------|---------------|------|-------------|--------------|--------------|---------|
| 1      | 6.521         | BBA  | 0.2460      | 2.58408e4    | 1586.63135   | 97.0962 |
| 2      | 9.305         | BB   | 0.4811      | 772.79749    | 22.25761     | 2.9038  |

Totals : 2.66136e4 1608.88896

**Figure S114. HPLC Chromatography of the Racemic *N,N'*-(Propane-1,2-diyl)bis(4-methoxybenzamide) (3ag).**

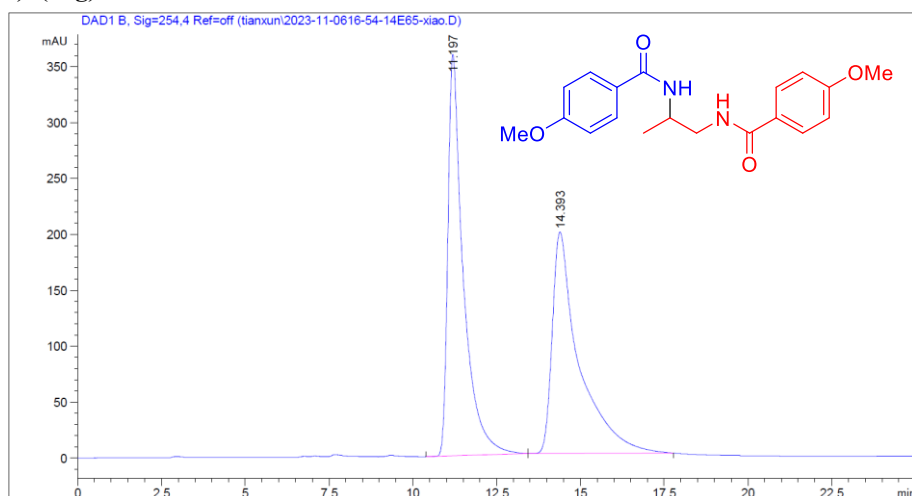

Signal 1: DAD1 B, Sig=254,4 Ref=off

| Peak # | RetTime [min] | Type | Width [min] | Area [mAU*s] | Height [mAU] | Area %  |
|--------|---------------|------|-------------|--------------|--------------|---------|
| 1      | 11.197        | BB   | 0.4552      | 1.14838e4    | 358.95984    | 51.1003 |
| 2      | 14.393        | BBA  | 0.7697      | 1.09893e4    | 197.93706    | 48.8997 |

Totals : 2.24731e4 556.89690

**Figure S115. HPLC Chromatography of (*S*)-*N,N'*-(Propane-1,2-diyl)bis(4-methoxybenzamide) (3ag).**

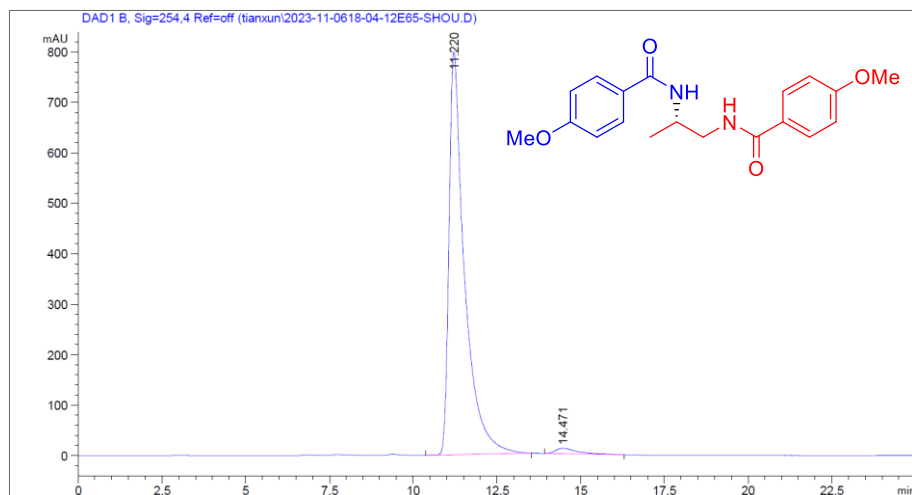

Signal 1: DAD1 B, Sig=254,4 Ref=off

| Peak # | RetTime [min] | Type | Width [min] | Area [mAU*s] | Height [mAU] | Area %  |
|--------|---------------|------|-------------|--------------|--------------|---------|
| 1      | 11.220        | BBA  | 0.4547      | 2.56343e4    | 798.23718    | 98.0145 |
| 2      | 14.471        | BBA  | 0.6518      | 519.28333    | 11.18212     | 1.9855  |

Totals : 2.61536e4 809.41930

**Figure S116. HPLC Chromatography of the Racemic 4-Fluoro-*N*-(1-(4-methoxybenzamido)propan-2-yl)benzamide (3ah).**

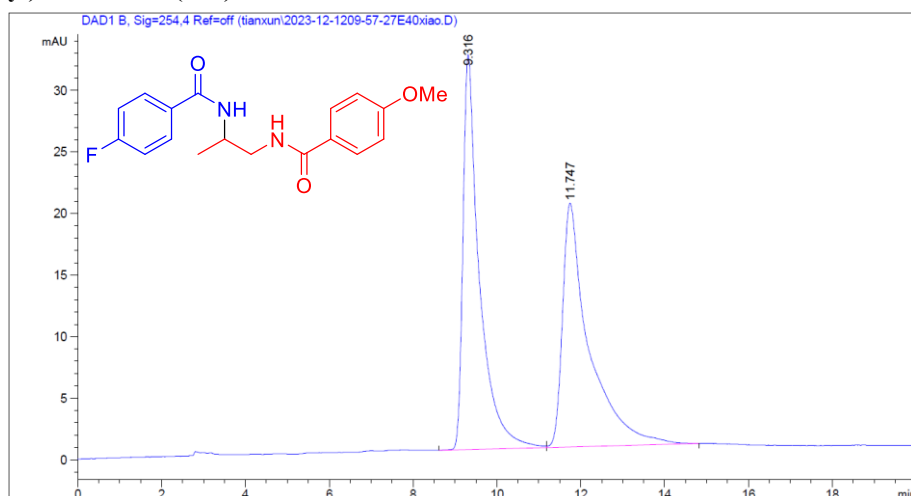

Signal 1: DAD1 B, Sig=254,4 Ref=off

| Peak # | RetTime [min] | Type | Width [min] | Area [mAU*s] | Height [mAU] | Area %  |
|--------|---------------|------|-------------|--------------|--------------|---------|
| 1      | 9.316         | BV   | 0.3835      | 872.69403    | 32.07031     | 50.0878 |
| 2      | 11.747        | VB   | 0.6088      | 869.63373    | 19.78493     | 49.9122 |

Totals : 1742.32776 51.85524

**Figure S117. HPLC Chromatography of (*S*)-4-Fluoro-*N*-(1-(4-methoxybenzamido)propan-2-yl)benzamide (3ah).**

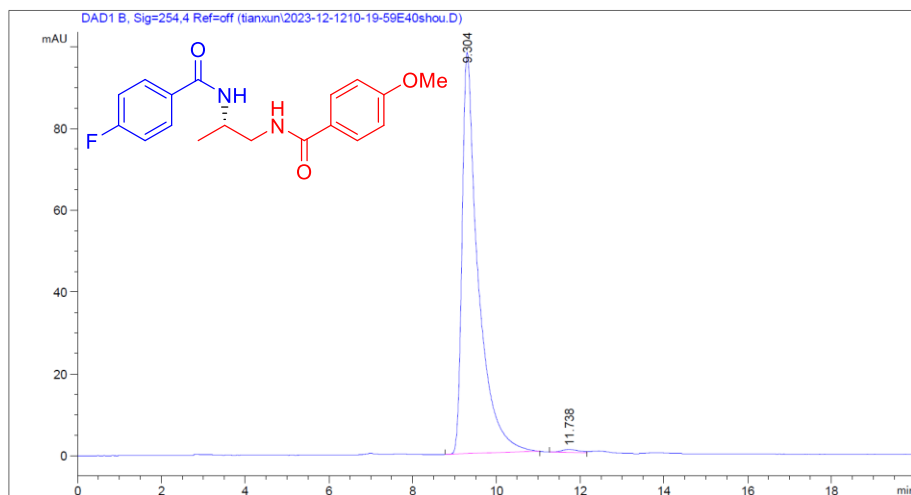

Signal 1: DAD1 B, Sig=254,4 Ref=off

| Peak # | RetTime [min] | Type | Width [min] | Area [mAU*s] | Height [mAU] | Area %  |
|--------|---------------|------|-------------|--------------|--------------|---------|
| 1      | 9.304         | BBA  | 0.3762      | 2609.54102   | 98.14292     | 99.1677 |
| 2      | 11.738        | BV   | 0.4094      | 21.90266     | 7.57336e-1   | 0.8323  |

Totals : 2631.44367 98.90026

**Figure S118. HPLC Chromatography of the Racemic 4-Chloro-*N*-(1-(4-methoxybenzamido)propan-2-yl)benzamide (3ai).**

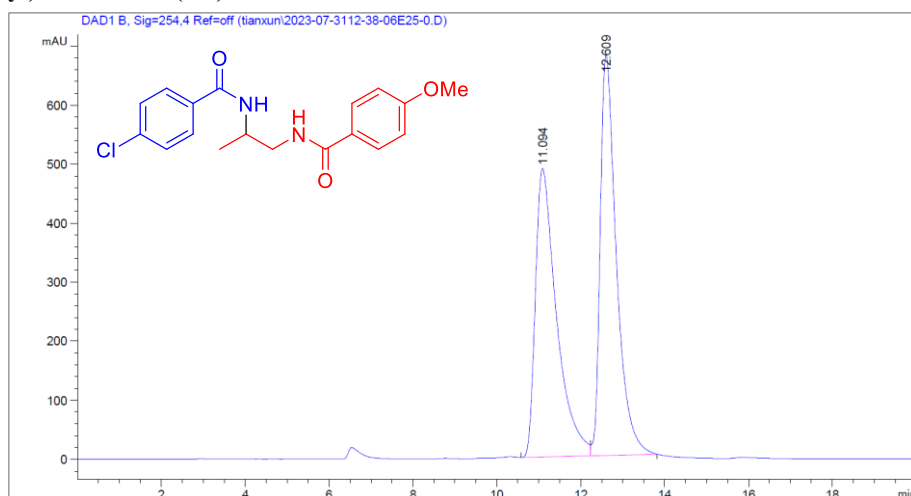

Signal 1: DAD1 B, Sig=254,4 Ref=off

| Peak # | RetTime [min] | Type | Width [min] | Area [mAU*s] | Height [mAU] | Area %  |
|--------|---------------|------|-------------|--------------|--------------|---------|
| 1      | 11.094        | BV   | 0.5163      | 1.71043e4    | 488.70969    | 48.4639 |
| 2      | 12.609        | VBA  | 0.4047      | 1.81885e4    | 678.65448    | 51.5361 |

Totals : 3.52927e4 1167.36417

**Figure S119. HPLC Chromatography of (*S*)-4-Chloro-*N*-(1-(4-methoxybenzamido)propan-2-yl)benzamide (3ai).**

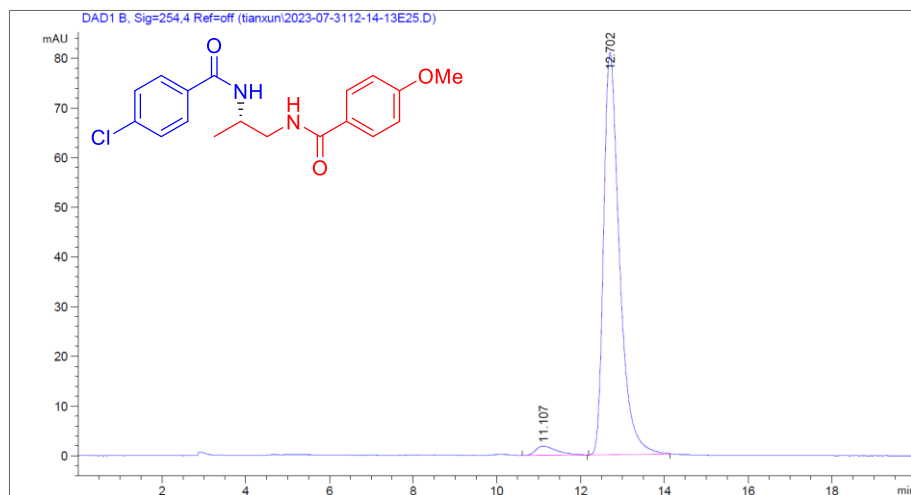

Signal 1: DAD1 B, Sig=254,4 Ref=off

| Peak # | RetTime [min] | Type | Width [min] | Area [mAU*s] | Height [mAU] | Area %  |
|--------|---------------|------|-------------|--------------|--------------|---------|
| 1      | 11.107        | BB   | 0.5013      | 63.28051     | 1.83962      | 2.8859  |
| 2      | 12.702        | BBA  | 0.4028      | 2129.46045   | 80.96626     | 97.1141 |

Totals : 2192.74096 82.80588

**Figure S120. HPLC Chromatography of the Racemic 4-Bromo-*N*-(1-(4-methoxybenzamido)propan-2-yl)benzamide (3aj).**

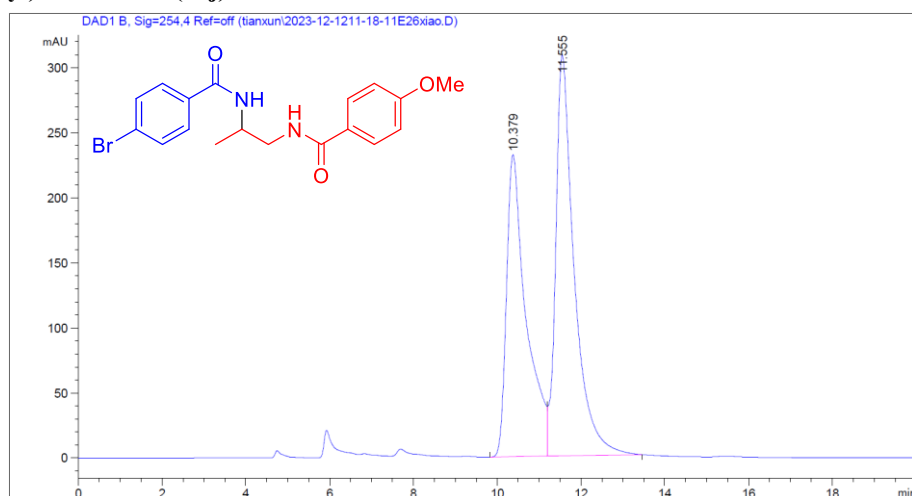

Signal 1: DAD1 B, Sig=254,4 Ref=off

| Peak #   | RetTime [min] | Type | Width [min] | Area [mAU*s] | Height [mAU] | Area %  |
|----------|---------------|------|-------------|--------------|--------------|---------|
| 1        | 10.379        | BV   | 0.4611      | 7540.42773   | 232.05092    | 44.3948 |
| 2        | 11.555        | VBA  | 0.4420      | 9444.52344   | 307.82132    | 55.6052 |
| Totals : |               |      |             | 1.69850e4    | 539.87224    |         |

**Figure S121. HPLC Chromatography of (*S*)-4-Bromo-*N*-(1-(4-methoxybenzamido)propan-2-yl)benzamide (3aj).**

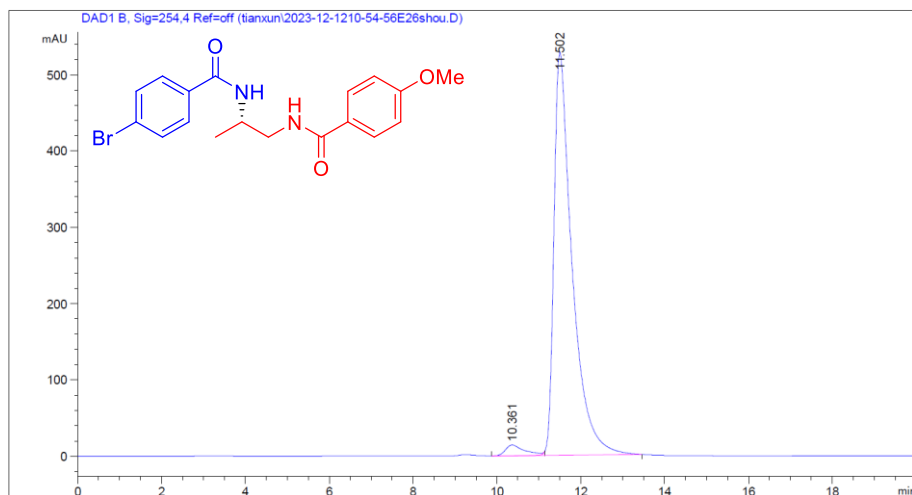

Signal 1: DAD1 B, Sig=254,4 Ref=off

| Peak #   | RetTime [min] | Type | Width [min] | Area [mAU*s] | Height [mAU] | Area %  |
|----------|---------------|------|-------------|--------------|--------------|---------|
| 1        | 10.361        | BV E | 0.4446      | 438.09735    | 14.01827     | 2.6853  |
| 2        | 11.502        | VBAR | 0.4349      | 1.58767e4    | 527.89636    | 97.3147 |
| Totals : |               |      |             | 1.63148e4    | 541.91463    |         |

**Figure S122. HPLC Chromatography of the Racemic 4-Methoxy-*N*-(2-(4-(trifluoromethoxy)benzamido)propyl)benzamide (3ak).**

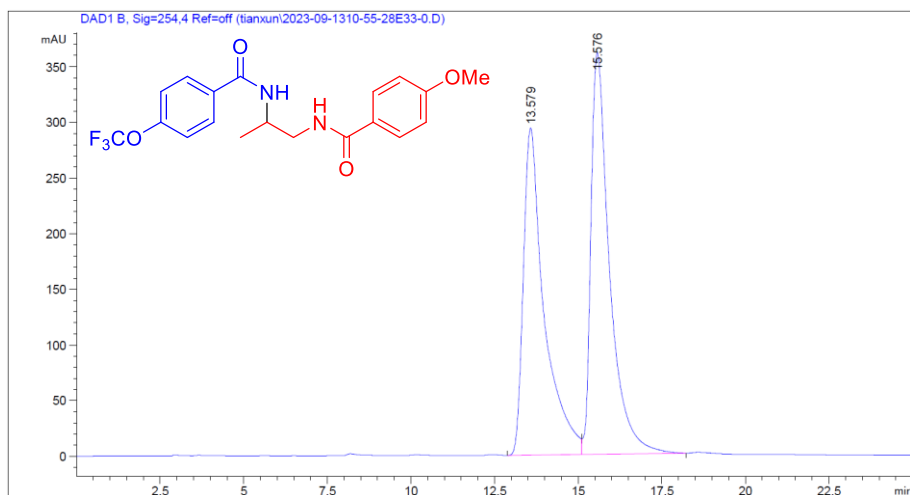

Signal 1: DAD1 B, Sig=254,4 Ref=off

| Peak # | RetTime [min] | Type | Width [min] | Area [mAU*s] | Height [mAU] | Area %  |
|--------|---------------|------|-------------|--------------|--------------|---------|
| 1      | 13.579        | BV   | 0.6211      | 1.27195e4    | 293.79965    | 47.6367 |
| 2      | 15.576        | VB   | 0.5724      | 1.39816e4    | 360.60199    | 52.3633 |

Totals : 2.67011e4 654.40164

**Figure S123. HPLC Chromatography of (*S*)-4-Methoxy-*N*-(2-(4-(trifluoromethoxy)benzamido)propyl)benzamide (3ak).**

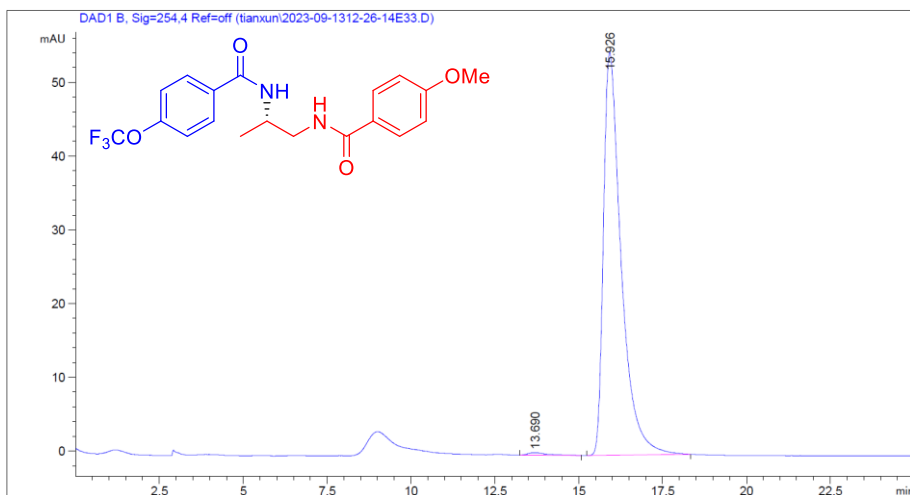

Signal 1: DAD1 B, Sig=254,4 Ref=off

| Peak # | RetTime [min] | Type | Width [min] | Area [mAU*s] | Height [mAU] | Area %  |
|--------|---------------|------|-------------|--------------|--------------|---------|
| 1      | 13.690        | BB   | 0.5053      | 13.61694     | 3.44384e-1   | 0.6733  |
| 2      | 15.926        | BBA  | 0.5490      | 2008.79065   | 54.63310     | 99.3267 |

Totals : 2022.40759 54.97748

**Figure S124. HPLC Chromatography of the Racemic *N*-(1-(4-Methoxybenzamido)propan-2-yl)thiophene-2-carboxamide (3a).**

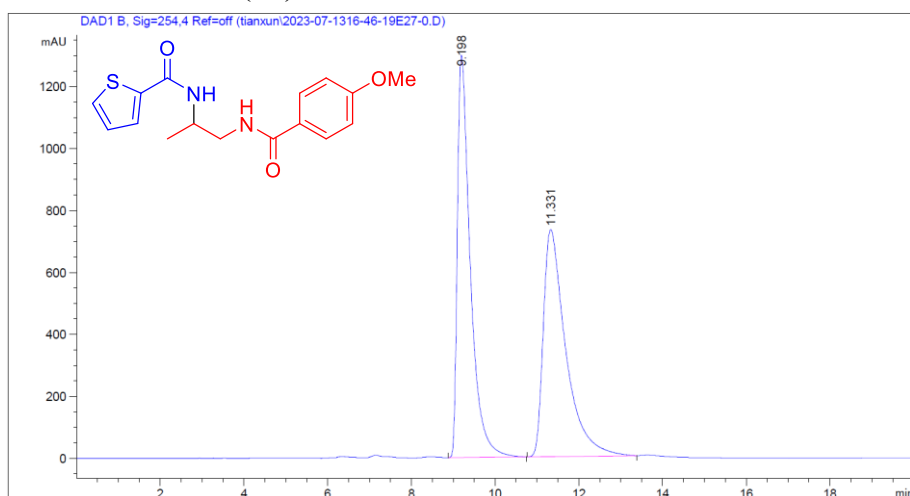

Signal 1: DAD1 B, Sig=254,4 Ref=off

| Peak # | RetTime [min] | Type | Width [min] | Area [mAU*s] | Height [mAU] | Area %  |
|--------|---------------|------|-------------|--------------|--------------|---------|
| 1      | 9.198         | BB   | 0.3156      | 2.77920e4    | 1298.90918   | 50.4623 |
| 2      | 11.331        | BBA  | 0.5459      | 2.72828e4    | 733.59882    | 49.5377 |

Totals : 5.50748e4 2032.50800

**Figure S125. HPLC Chromatography of (*S*)-*N*-(1-(4-Methoxybenzamido)propan-2-yl)thiophene-2-carboxamide (3a).**

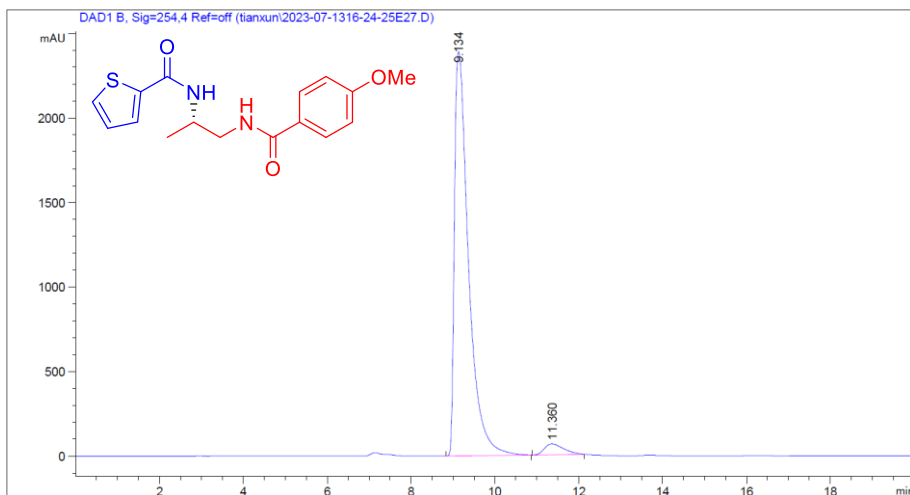

Signal 1: DAD1 B, Sig=254,4 Ref=off

| Peak # | RetTime [min] | Type | Width [min] | Area [mAU*s] | Height [mAU] | Area %  |
|--------|---------------|------|-------------|--------------|--------------|---------|
| 1      | 9.134         | BB   | 0.3498      | 5.56589e4    | 2389.24463   | 96.4150 |
| 2      | 11.360        | BBA  | 0.4827      | 2069.58618   | 64.79060     | 3.5850  |

Totals : 5.77284e4 2454.03523

**Figure S126. HPLC Chromatography of the Racemic *N*-((3*S*)-3-Benzamidobutan-2-yl)-4-methoxybenzamide (3ba) (Major diastereoisomer).**

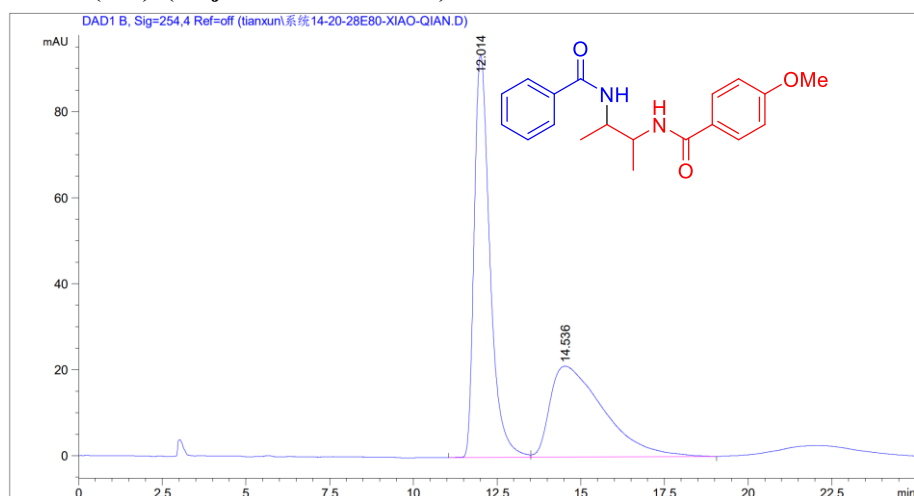

Signal 1: DAD1 B, Sig=254,4 Ref=off

| Peak # | RetTime [min] | Type | Width [min] | Area [mAU*s] | Height [mAU] | Area %  |
|--------|---------------|------|-------------|--------------|--------------|---------|
| 1      | 12.014        | BV   | 0.5019      | 3065.40088   | 93.63917     | 56.6626 |
| 2      | 14.536        | VBA  | 1.5448      | 2344.52148   | 21.15731     | 43.3374 |

Totals : 5409.92236 114.79648

**Figure S127. HPLC Chromatography of *N*-((3*S*)-3-Benzamidobutan-2-yl)-4-methoxybenzamide (3ba) (Major diastereoisomer).**

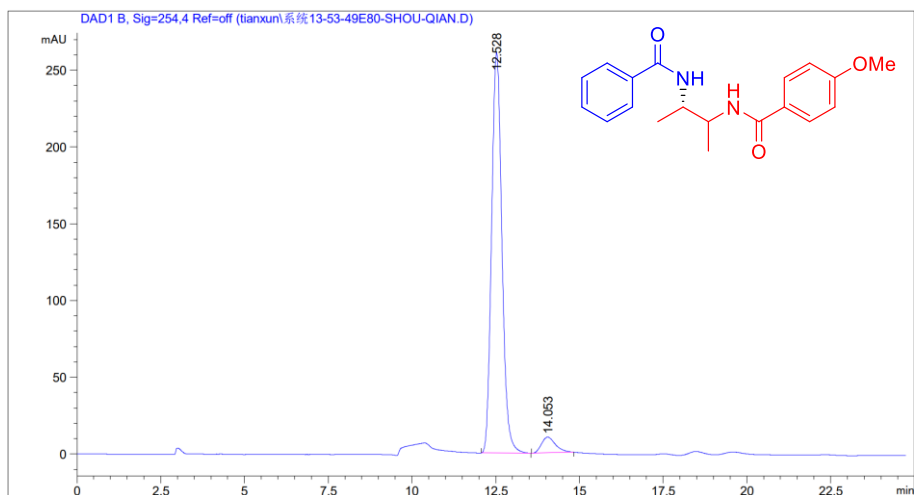

Signal 1: DAD1 B, Sig=254,4 Ref=off

| Peak # | RetTime [min] | Type | Width [min] | Area [mAU*s] | Height [mAU] | Area %  |
|--------|---------------|------|-------------|--------------|--------------|---------|
| 1      | 12.528        | BB   | 0.3347      | 5599.23145   | 260.59082    | 94.9045 |
| 2      | 14.053        | BBA  | 0.4542      | 300.62674    | 10.24944     | 5.0955  |

Totals : 5899.85818 270.84026

**Figure S128. HPLC Chromatography of the Racemic *N*-((3*S*)-3-Benzamidobutan-2-yl)-4-methoxybenzamide (3ba) (Minor diastereoisomer).**

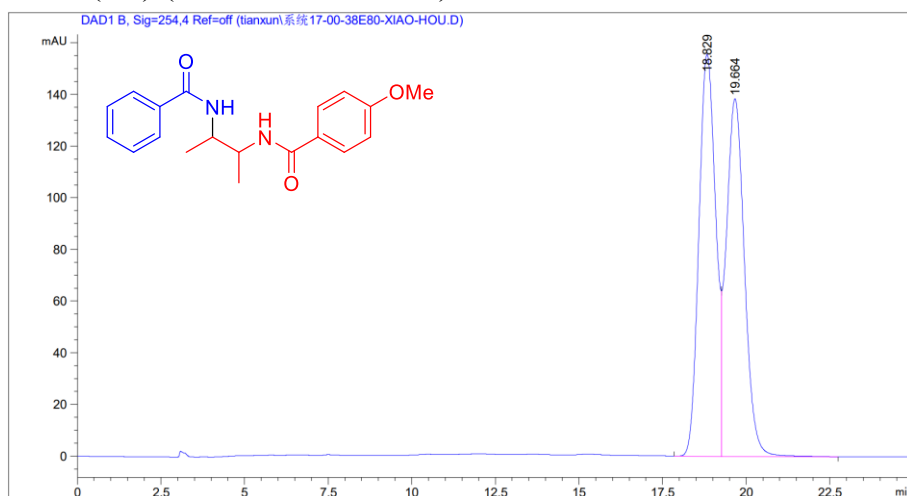

Signal 1: DAD1 B, Sig=254,4 Ref=off

| Peak # | RetTime [min] | Type | Width [min] | Area [mAU*s] | Height [mAU] | Area %  |
|--------|---------------|------|-------------|--------------|--------------|---------|
| 1      | 18.829        | BV   | 0.5390      | 5428.87842   | 155.62836    | 50.8304 |
| 2      | 19.664        | VB   | 0.5783      | 5251.50342   | 138.51923    | 49.1696 |

Totals : 1.06804e4 294.14758

**Figure S129. HPLC Chromatography of *N*-((3*S*)-3-Benzamidobutan-2-yl)-4-methoxybenzamide (3ba) (Minor diastereoisomer).**

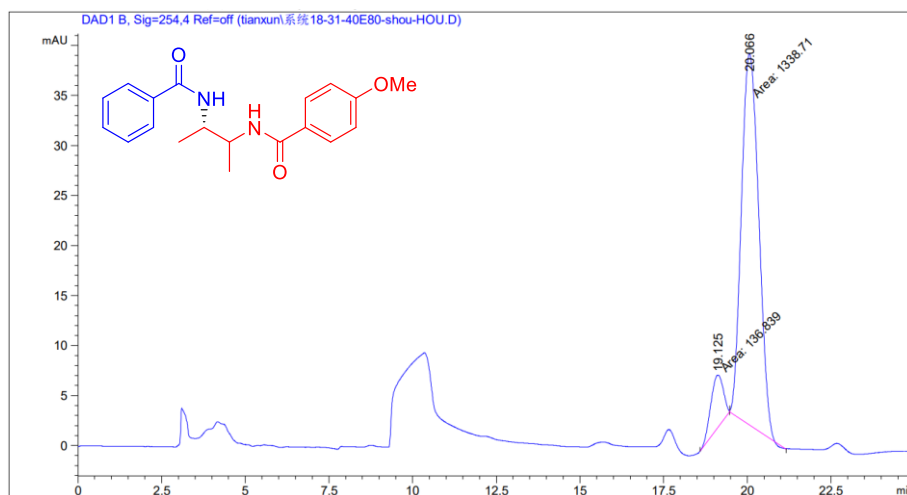

Signal 1: DAD1 B, Sig=254,4 Ref=off

| Peak # | RetTime [min] | Type | Width [min] | Area [mAU*s] | Height [mAU] | Area %  |
|--------|---------------|------|-------------|--------------|--------------|---------|
| 1      | 19.125        | MM   | 0.4328      | 136.83942    | 5.27004      | 9.2738  |
| 2      | 20.066        | MM   | 0.6007      | 1338.70789   | 37.14119     | 90.7262 |

Totals : 1475.54730 42.41123

**Figure S130. HPLC Chromatography of the Racemic *N*-((2*S*)-3-Benzamido-1-phenylbutan-2-yl)-4-methoxybenzamide (3ca).**

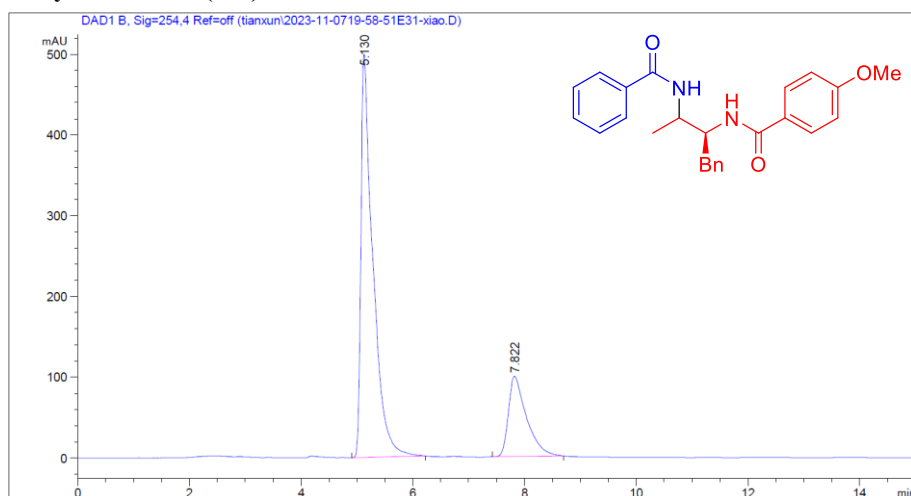

Signal 1: DAD1 B, Sig=254,4 Ref=off

| Peak # | RetTime [min] | Type | Width [min] | Area [mAU*s] | Height [mAU] | Area %  |
|--------|---------------|------|-------------|--------------|--------------|---------|
| 1      | 5.130         | BBA  | 0.2059      | 7441.62158   | 499.23395    | 76.9339 |
| 2      | 7.822         | BBA  | 0.3239      | 2231.12744   | 99.38867     | 23.0661 |

Totals : 9672.74902 598.62262

**Figure S131. HPLC Chromatography of *N*-((2*S*,3*S*)-3-Benzamido-1-phenylbutan-2-yl)-4-methoxybenzamide (3ca).**

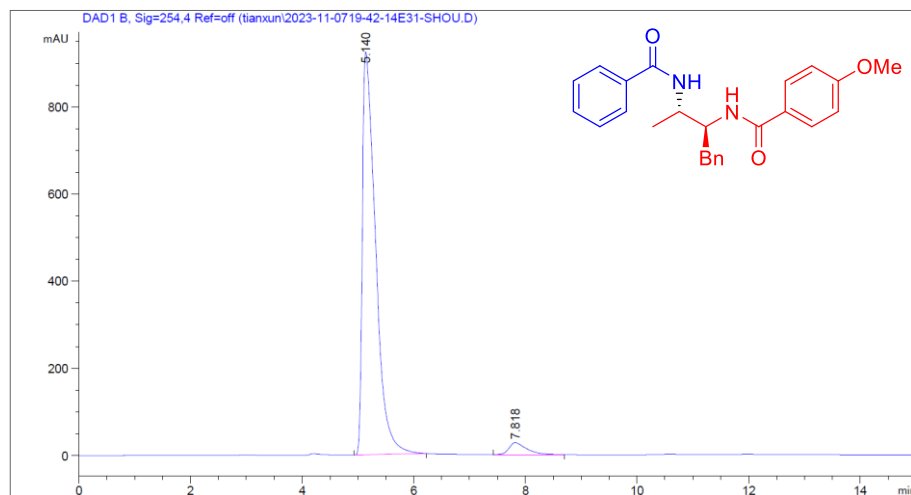

Signal 1: DAD1 B, Sig=254,4 Ref=off

| Peak # | RetTime [min] | Type | Width [min] | Area [mAU*s] | Height [mAU] | Area %  |
|--------|---------------|------|-------------|--------------|--------------|---------|
| 1      | 5.140         | BBA  | 0.2435      | 1.51653e4    | 924.04755    | 96.1965 |
| 2      | 7.818         | BBA  | 0.3174      | 599.62103    | 27.39000     | 3.8035  |

Totals : 1.57649e4 951.43755

**Figure S132. HPLC Chromatography of the Racemic *N*-((1*S*)-2-Benzamido-1-cyclohexylpropyl)-4-methoxybenzamide.**

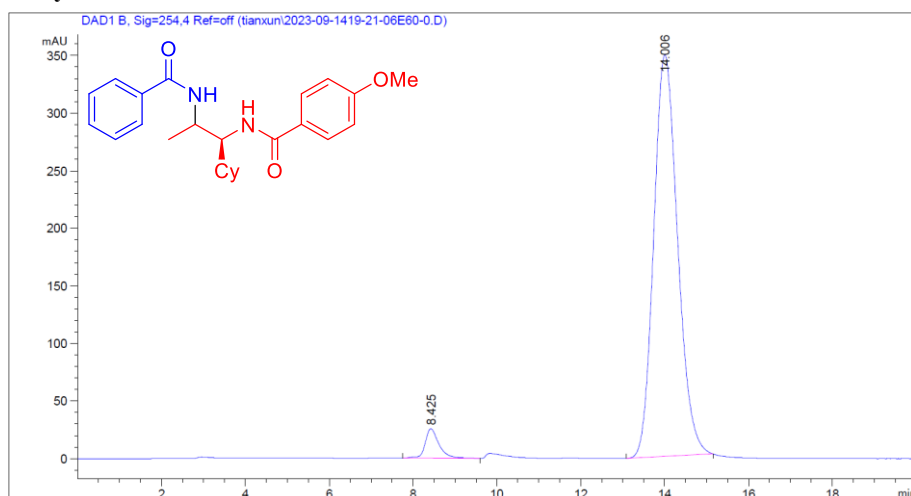

Signal 1: DAD1 B, Sig=254,4 Ref=off

| Peak # | RetTime [min] | Type | Width [min] | Area [mAU*s] | Height [mAU] | Area %  |
|--------|---------------|------|-------------|--------------|--------------|---------|
| 1      | 8.425         | BB   | 0.3366      | 580.01459    | 25.56973     | 4.0378  |
| 2      | 14.006        | BBA  | 0.6132      | 1.37847e4    | 348.68677    | 95.9622 |

Totals : 1.43648e4 374.25650

**Figure S133. HPLC Chromatography of *N*-((1*S*,2*S*)-2-Benzamido-1-cyclohexylpropyl)-4-methoxybenzamide (3da).**

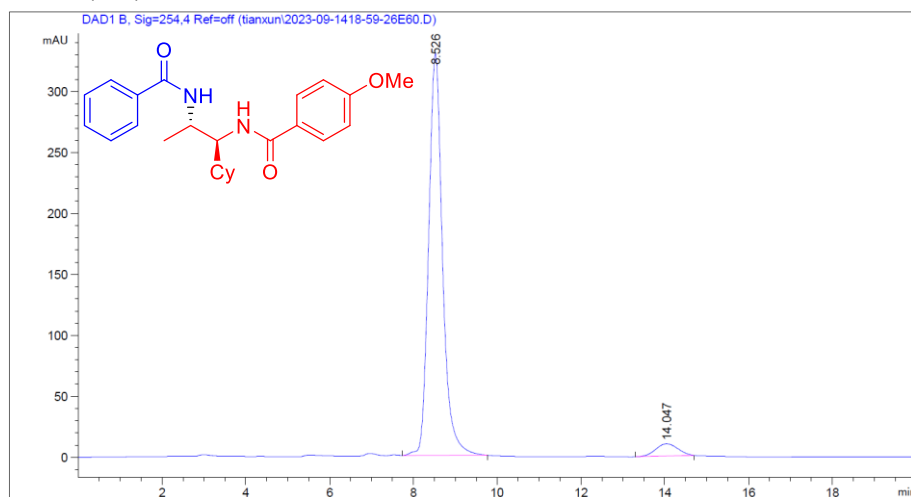

Signal 1: DAD1 B, Sig=254,4 Ref=off

| Peak # | RetTime [min] | Type | Width [min] | Area [mAU*s] | Height [mAU] | Area %  |
|--------|---------------|------|-------------|--------------|--------------|---------|
| 1      | 8.526         | BBA  | 0.3528      | 7584.44971   | 329.24692    | 95.3609 |
| 2      | 14.047        | BBA  | 0.5720      | 368.96878    | 10.05705     | 4.6391  |

Totals : 7953.41849 339.30397

**Figure S134. HPLC Chromatography of the Racemic *N*-(2-Benzamidobutyl)-4-methoxybenzamide (3ea)**

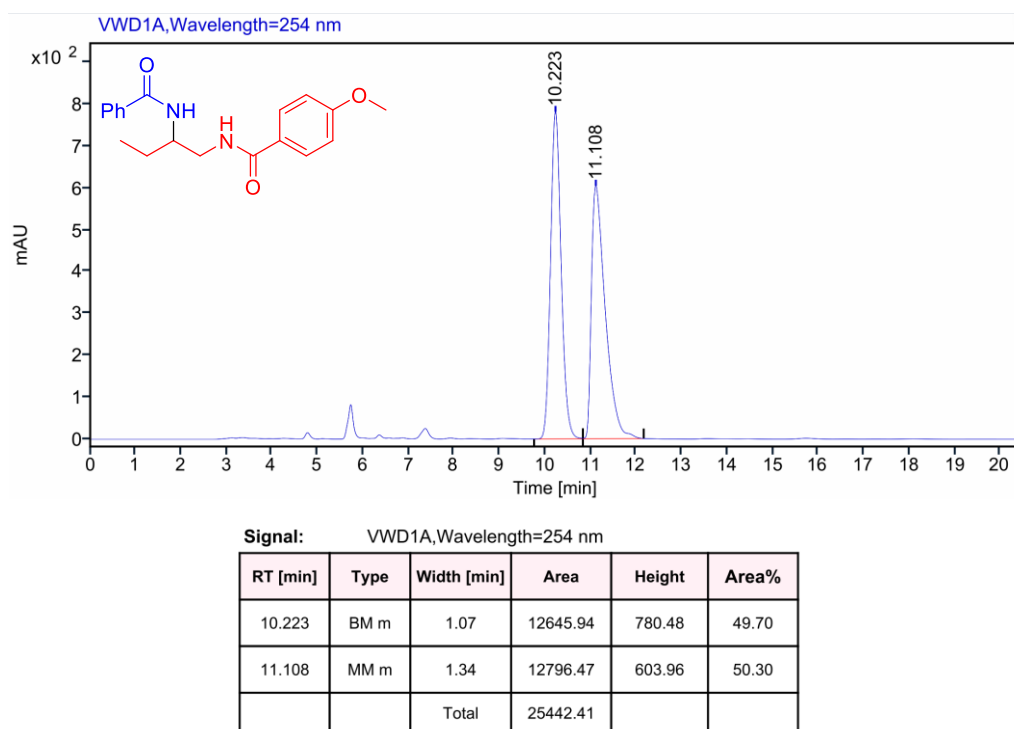

**Figure S135. HPLC Chromatography of (*S*)-*N*-(2-Benzamidobutyl)-4-methoxybenzamide (3ea)**

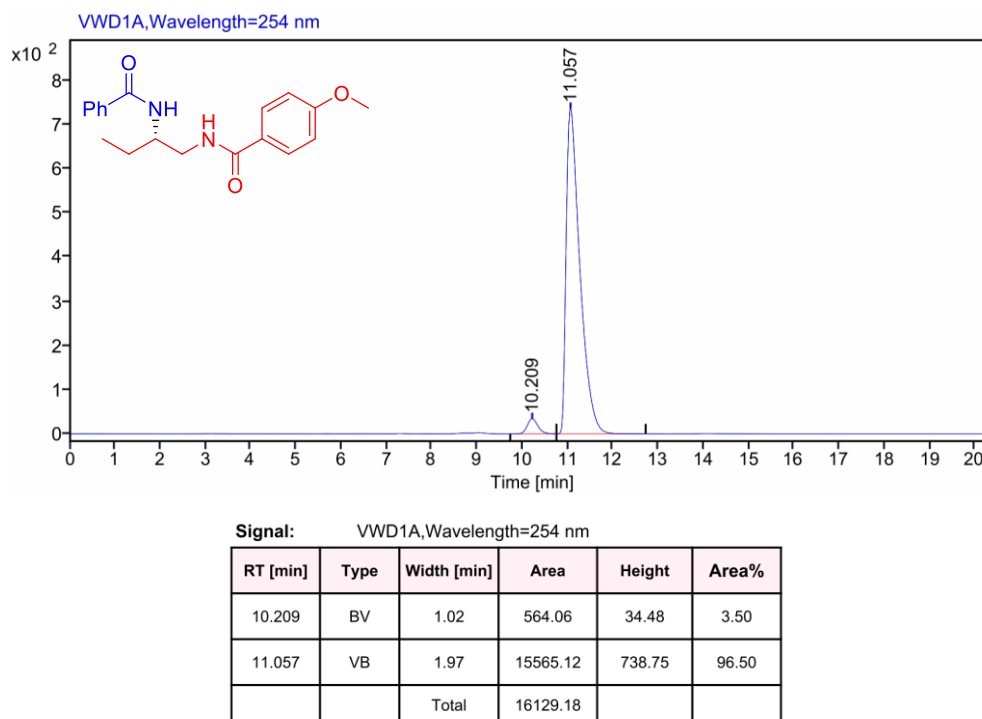

**Figure S136. HPLC Chromatography of the Racemic *tert*-Butyl-(2-(4-methoxybenzamido)propyl)carbamate (3fg)**

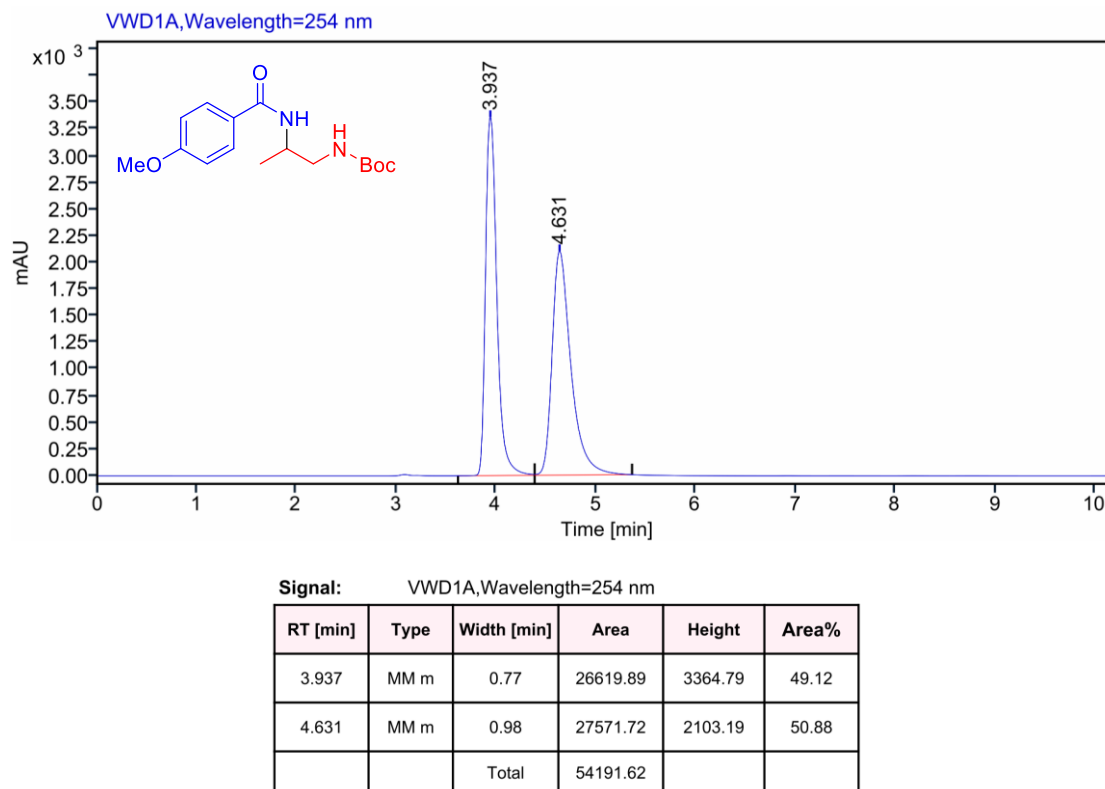

**Figure S137. HPLC Chromatography of *tert*-Butyl (*S*)-(2-(4-methoxybenzamido)propyl)carbamate (3fg)**

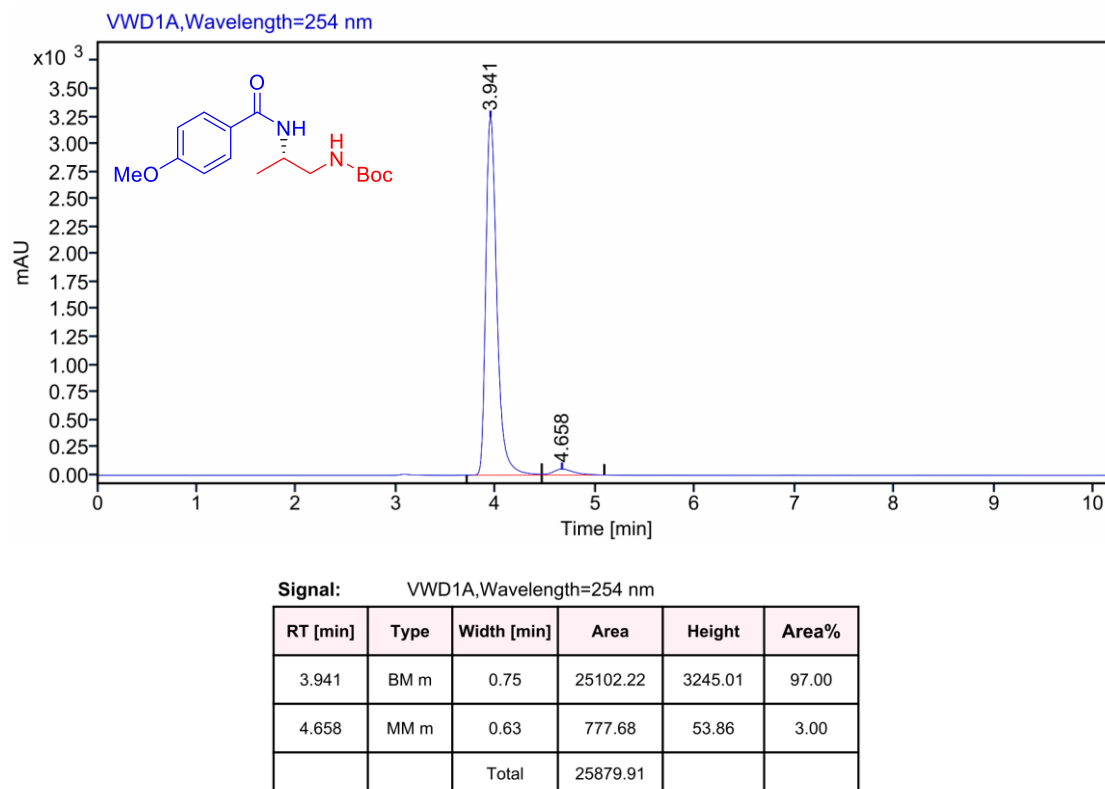

**Figure S138. HPLC Chromatography of the Racemic *N*-(4-((4-Methoxyphenyl)amino)-4-oxobutan-2-yl)benzamide (5aa).**

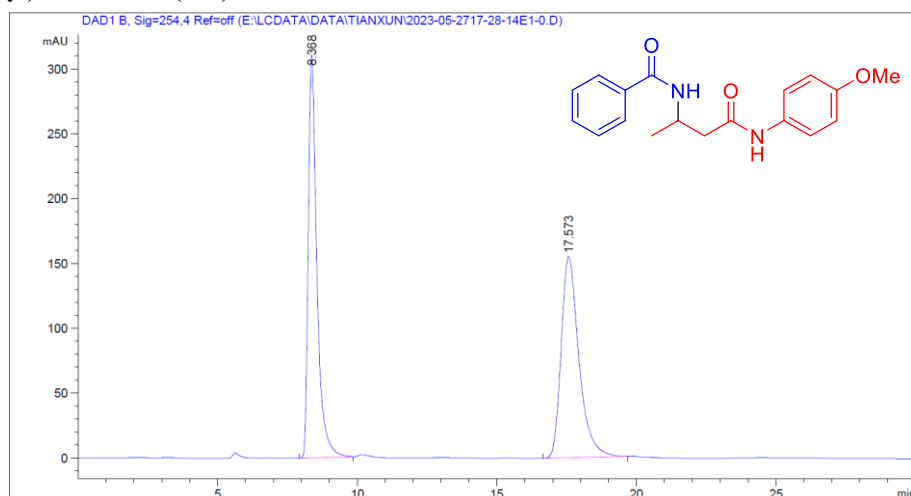

Signal 1: DAD1 B, Sig=254,4 Ref=off

| Peak # | RetTime [min] | Type | Width [min] | Area [mAU*s] | Height [mAU] | Area %  |
|--------|---------------|------|-------------|--------------|--------------|---------|
| 1      | 8.368         | BBA  | 0.3191      | 6635.75000   | 310.80490    | 49.1670 |
| 2      | 17.573        | BB   | 0.6676      | 6860.60107   | 155.23618    | 50.8330 |

Totals : 1.34964e4 466.04108

**Figure S139. HPLC Chromatography of (*S*)-*N*-(4-((4-Methoxyphenyl)amino)-4-oxobutan-2-yl)benzamide (5aa).**

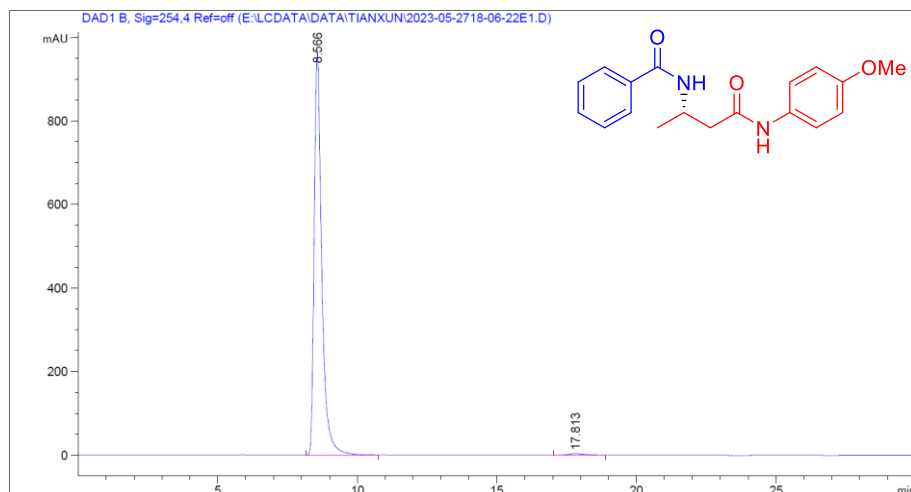

Signal 1: DAD1 B, Sig=254,4 Ref=off

| Peak # | RetTime [min] | Type | Width [min] | Area [mAU*s] | Height [mAU] | Area %  |
|--------|---------------|------|-------------|--------------|--------------|---------|
| 1      | 8.566         | BB   | 0.2818      | 1.81780e4    | 964.86133    | 99.0712 |
| 2      | 17.813        | BBA  | 0.6050      | 170.41130    | 3.77243      | 0.9288  |

Totals : 1.83484e4 968.63375

**Figure S140. HPLC Chromatography of the Racemic *N*-(4-((4-Methoxyphenyl)amino)-4-oxobutan-2-yl)-2-methylbenzamide (5ab).**

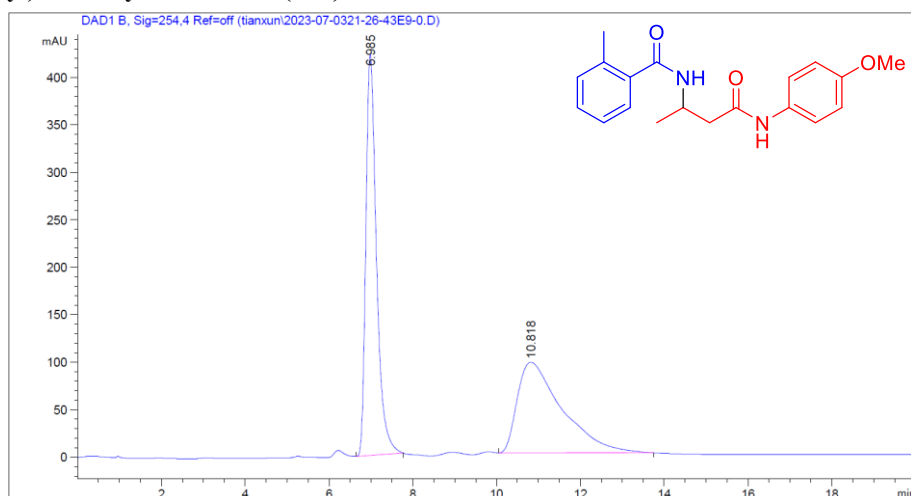

Signal 1: DAD1 B, Sig=254,4 Ref=off

| Peak # | RetTime [min] | Type | Width [min] | Area [mAU*s] | Height [mAU] | Area %  |
|--------|---------------|------|-------------|--------------|--------------|---------|
| 1      | 6.985         | BBA  | 0.2694      | 7430.88818   | 422.03644    | 51.2681 |
| 2      | 10.818        | BBA  | 1.0790      | 7063.27930   | 95.49199     | 48.7319 |

Totals : 1.44942e4 517.52843

**Figure S141. HPLC Chromatography of (*S*)-*N*-(4-((4-Methoxyphenyl)amino)-4-oxobutan-2-yl)-2-methylbenzamide (5ab)**

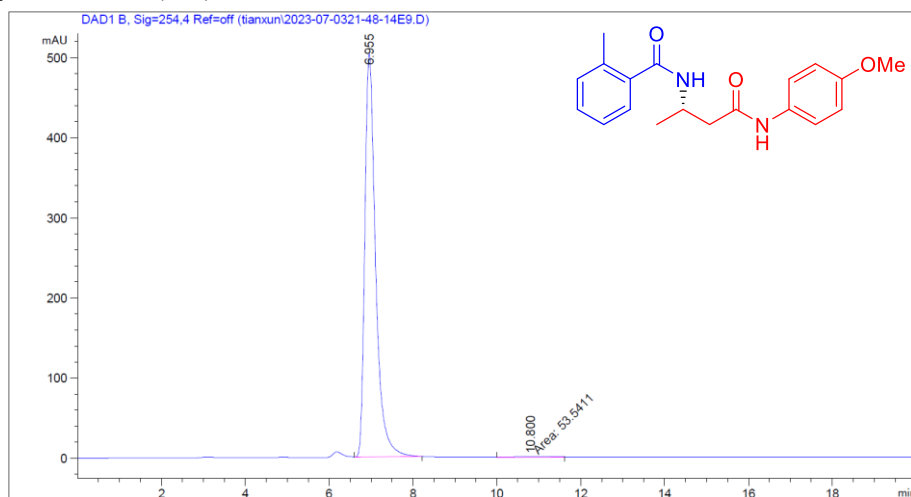

Signal 1: DAD1 B, Sig=254,4 Ref=off

| Peak # | RetTime [min] | Type | Width [min] | Area [mAU*s] | Height [mAU] | Area %  |
|--------|---------------|------|-------------|--------------|--------------|---------|
| 1      | 6.955         | VBA  | 0.2707      | 8995.57617   | 502.92819    | 99.4083 |
| 2      | 10.800        | MM   | 1.0580      | 53.54111     | 8.43457e-1   | 0.5917  |

Totals : 9049.11728 503.77165

**Figure S142. HPLC Chromatography of the Racemic 2-Methoxy-*N*-(4-((4-methoxyphenyl)amino)-4-oxobutan-2-yl)benzamide (5ac).**

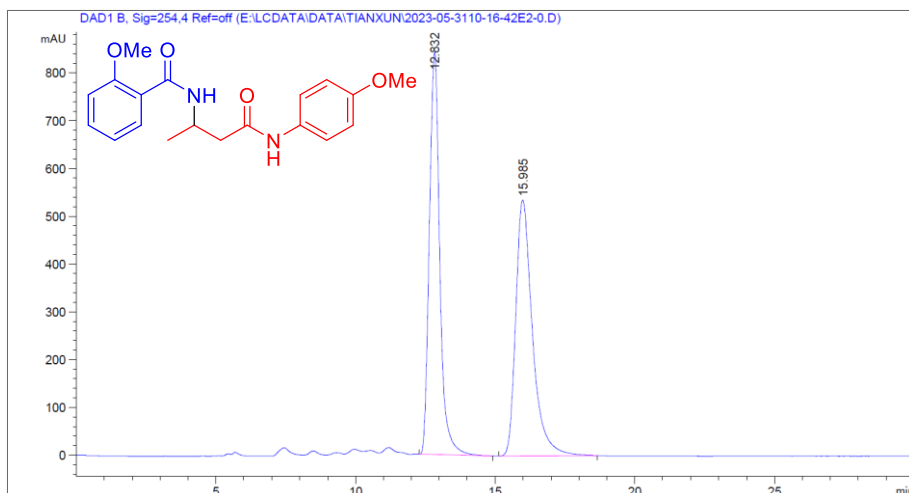

Signal 1: DAD1 B, Sig=254,4 Ref=off

| Peak # | RetTime [min] | Type | Width [min] | Area [mAU*s] | Height [mAU] | Area %  |
|--------|---------------|------|-------------|--------------|--------------|---------|
| 1      | 12.832        | BB   | 0.4006      | 2.18179e4    | 841.14001    | 49.6159 |
| 2      | 15.985        | BBA  | 0.6250      | 2.21557e4    | 535.20990    | 50.3841 |

Totals : 4.39735e4 1376.34991

**Figure S143. HPLC Chromatography of (*S*)-2-Methoxy-*N*-(4-((4-methoxyphenyl)amino)-4-oxobutan-2-yl)benzamide (5ac).**

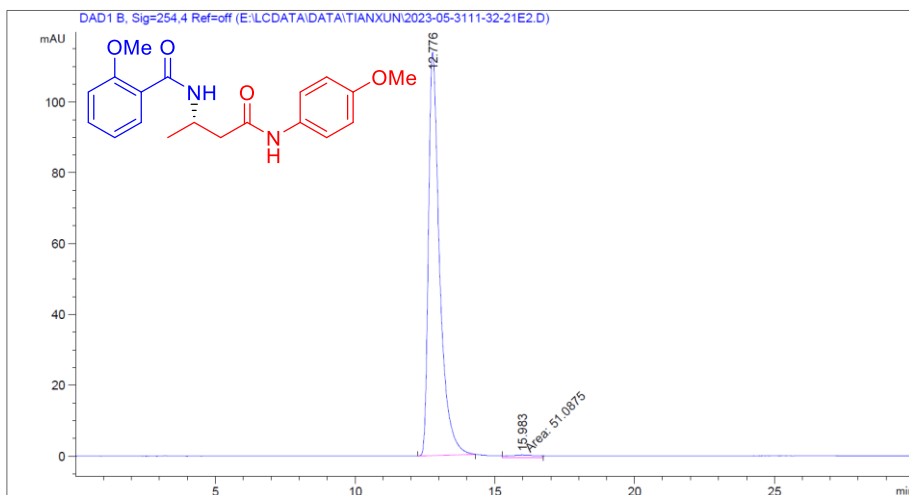

Signal 1: DAD1 B, Sig=254,4 Ref=off

| Peak # | RetTime [min] | Type | Width [min] | Area [mAU*s] | Height [mAU] | Area %  |
|--------|---------------|------|-------------|--------------|--------------|---------|
| 1      | 12.776        | BBA  | 0.4136      | 3157.29907   | 113.83295    | 98.4077 |
| 2      | 15.983        | MM   | 1.1800      | 51.08746     | 7.21572e-1   | 1.5923  |

Totals : 3208.38653 114.55453

**Figure S144. HPLC Chromatography of the Racemic *N*-(4-((4-Methoxyphenyl)amino)-4-oxobutan-2-yl)-3-methylbenzamide (5ad).**

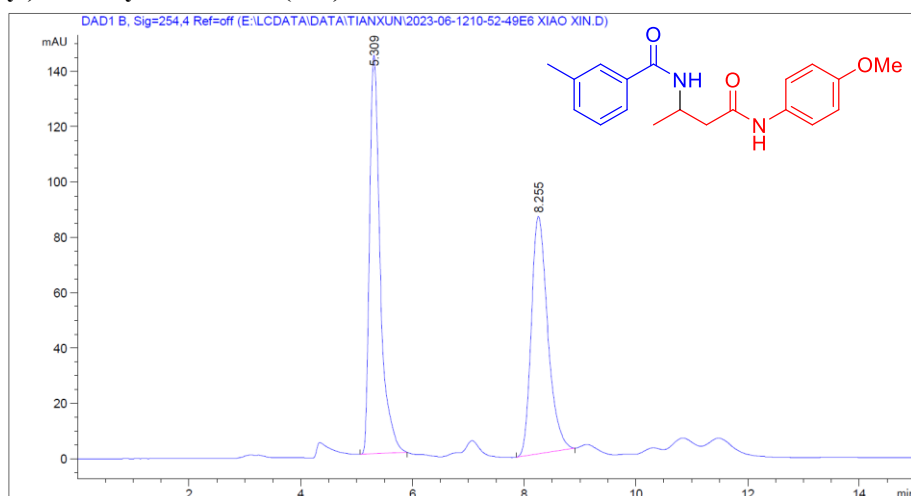

Signal 1: DAD1 B, Sig=254,4 Ref=off

| Peak # | RetTime [min] | Type | Width [min] | Area [mAU*s] | Height [mAU] | Area %  |
|--------|---------------|------|-------------|--------------|--------------|---------|
| 1      | 5.309         | BBA  | 0.2013      | 1892.05151   | 144.03728    | 51.9002 |
| 2      | 8.255         | BB   | 0.3124      | 1753.50256   | 85.81213     | 48.0998 |

Totals : 3645.55408 229.84940

**Figure S145. HPLC Chromatography of (*S*)-*N*-(4-((4-Methoxyphenyl)amino)-4-oxobutan-2-yl)-3-methylbenzamide (5ad).**

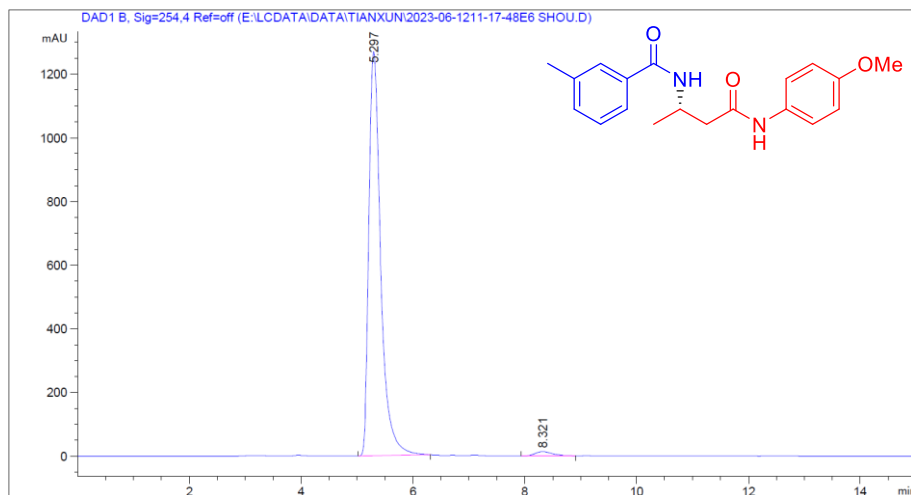

Signal 1: DAD1 B, Sig=254,4 Ref=off

| Peak # | RetTime [min] | Type | Width [min] | Area [mAU*s] | Height [mAU] | Area %  |
|--------|---------------|------|-------------|--------------|--------------|---------|
| 1      | 5.297         | BBA  | 0.2232      | 1.86152e4    | 1268.51575   | 98.4886 |
| 2      | 8.321         | BB   | 0.3285      | 285.67627    | 13.41293     | 1.5114  |

Totals : 1.89008e4 1281.92868

**Figure S146. HPLC Chromatography of the Racemic 3-Methoxy-*N*-(4-((4-methoxyphenyl)amino)-4-oxobutan-2-yl)benzamide (5ae).**

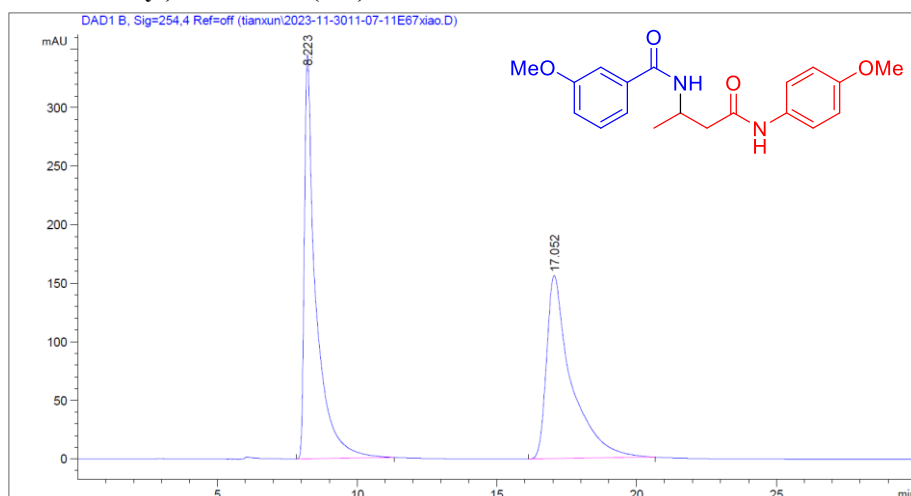

Signal 1: DAD1 B, Sig=254,4 Ref=off

| Peak # | RetTime [min] | Type | Width [min] | Area [mAU*s] | Height [mAU] | Area %  |
|--------|---------------|------|-------------|--------------|--------------|---------|
| 1      | 8.223         | BBA  | 0.3931      | 9850.93262   | 345.04919    | 50.6478 |
| 2      | 17.052        | BBA  | 0.8598      | 9598.95215   | 156.44342    | 49.3522 |

Totals : 1.94499e4 501.49261

**Figure S147. HPLC Chromatography of (*S*)-3-Methoxy-*N*-(4-((4-methoxyphenyl)amino)-4-oxobutan-2-yl)benzamide (5ae).**

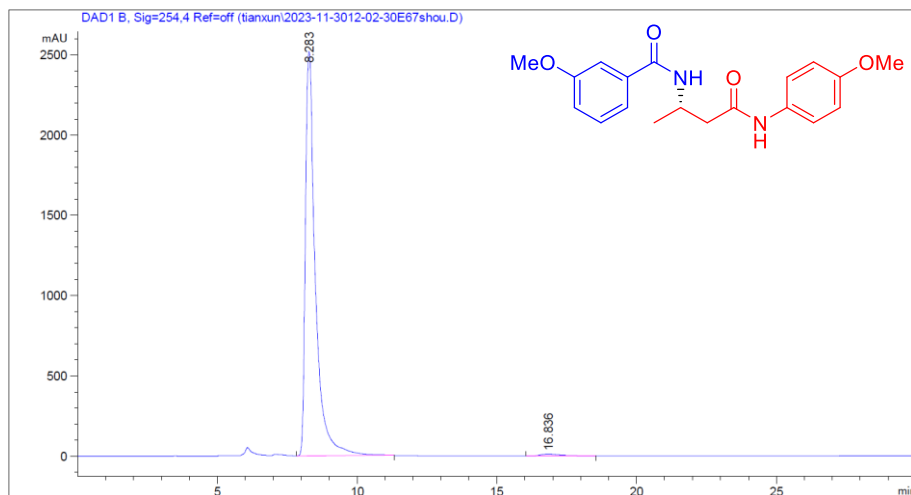

Signal 1: DAD1 B, Sig=254,4 Ref=off

| Peak # | RetTime [min] | Type | Width [min] | Area [mAU*s] | Height [mAU] | Area %  |
|--------|---------------|------|-------------|--------------|--------------|---------|
| 1      | 8.283         | BBA  | 0.3591      | 6.23340e4    | 2515.13745   | 99.0371 |
| 2      | 16.836        | BB   | 0.7093      | 606.03662    | 12.46344     | 0.9629  |

Totals : 6.29400e4 2527.60089

**Figure S148. HPLC Chromatography of the Racemic 4-Fluoro-*N*-(4-((4-methoxyphenyl)amino)-4-oxobutan-2-yl)benzamide (5ah).**

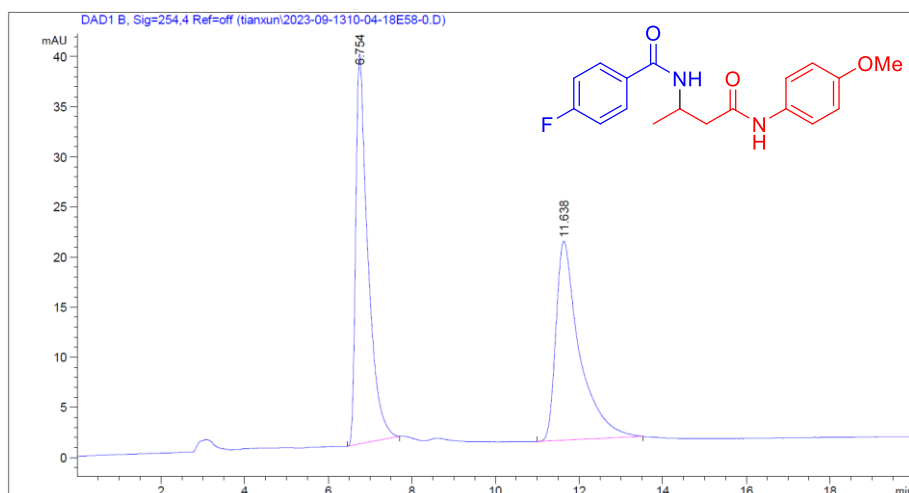

Signal 1: DAD1 B, Sig=254,4 Ref=off

| Peak # | RetTime [min] | Type | Width [min] | Area [mAU*s] | Height [mAU] | Area %  |
|--------|---------------|------|-------------|--------------|--------------|---------|
| 1      | 6.754         | BB   | 0.2874      | 785.34296    | 38.92079     | 50.3107 |
| 2      | 11.638        | BBA  | 0.5597      | 775.64203    | 19.85961     | 49.6893 |

Totals : 1560.98499 58.78041

**Figure S149. HPLC Chromatography of (*S*)-4-Fluoro-*N*-(4-((4-methoxyphenyl)amino)-4-oxobutan-2-yl)benzamide (5ah).**

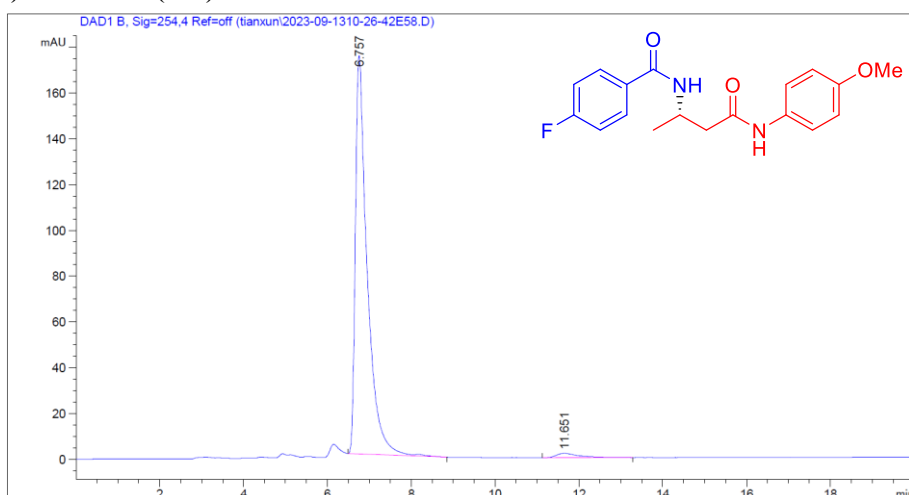

Signal 1: DAD1 B, Sig=254,4 Ref=off

| Peak # | RetTime [min] | Type | Width [min] | Area [mAU*s] | Height [mAU] | Area %  |
|--------|---------------|------|-------------|--------------|--------------|---------|
| 1      | 6.757         | BV R | 0.2748      | 3392.02368   | 173.94601    | 97.8903 |
| 2      | 11.651        | BB   | 0.5367      | 73.10411     | 1.93527      | 2.1097  |

Totals : 3465.12779 175.88129

**Figure S150. HPLC Chromatography of the Racemic 4-Chloro-*N*-(4-((4-methoxyphenyl)amino)-4-oxobutan-2-yl)benzamide (5ai).**

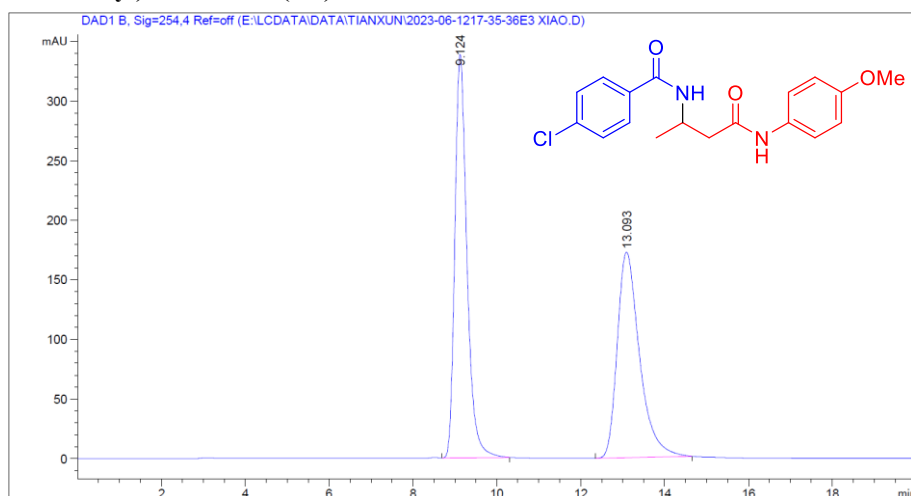

Signal 1: DAD1 B, Sig=254,4 Ref=off

| Peak # | RetTime [min] | Type | Width [min] | Area [mAU*s] | Height [mAU] | Area %  |
|--------|---------------|------|-------------|--------------|--------------|---------|
| 1      | 9.124         | BBA  | 0.3032      | 6763.21289   | 338.41547    | 51.5429 |
| 2      | 13.093        | BBA  | 0.5581      | 6358.30713   | 172.47862    | 48.4571 |

Totals : 1.31215e4 510.89409

**Figure S151. HPLC Chromatography of (*S*)-4-Chloro-*N*-(4-((4-methoxyphenyl)amino)-4-oxobutan-2-yl)benzamide (5ai).**

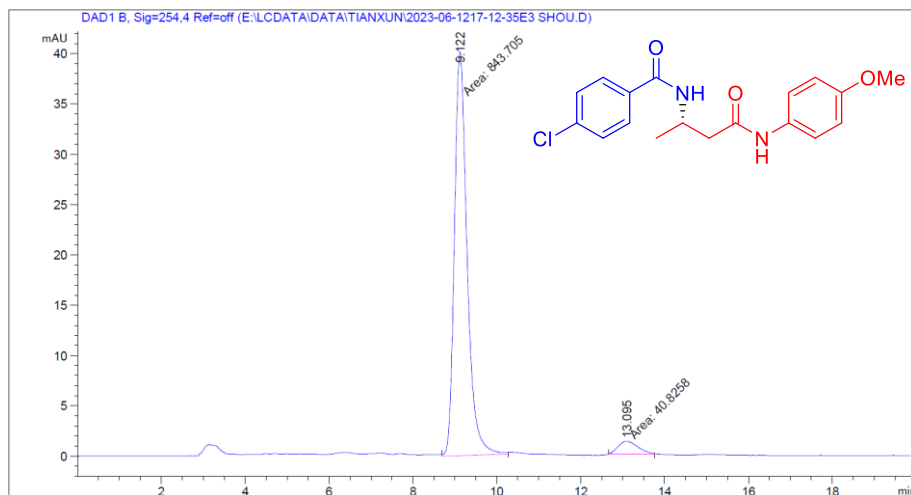

Signal 1: DAD1 B, Sig=254,4 Ref=off

| Peak # | RetTime [min] | Type | Width [min] | Area [mAU*s] | Height [mAU] | Area %  |
|--------|---------------|------|-------------|--------------|--------------|---------|
| 1      | 9.122         | MM   | 0.3504      | 843.70477    | 40.13346     | 95.3845 |
| 2      | 13.095        | MM   | 0.5428      | 40.82583     | 1.25351      | 4.6155  |

Totals : 884.53060 41.38697

**Figure S152. HPLC Chromatography of the Racemic 4-Bromo-*N*-(4-((4-methoxyphenyl)amino)-4-oxobutan-2-yl)benzamide (5aj).**

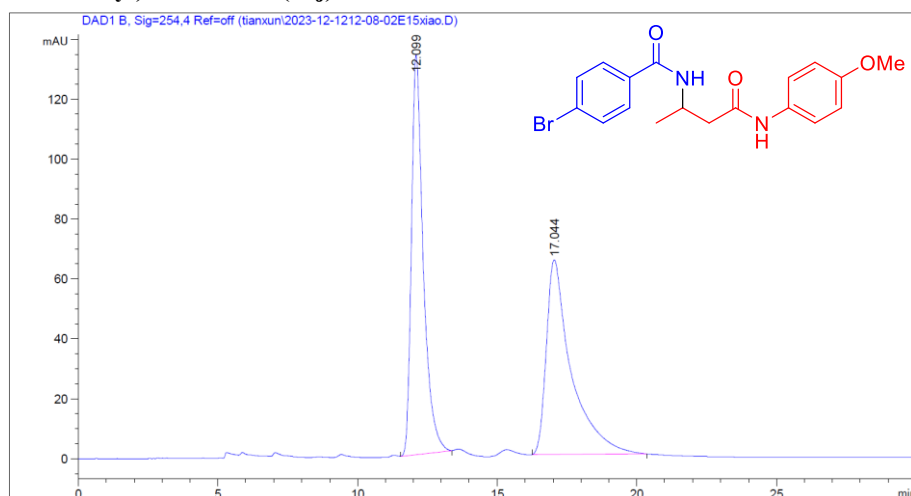

Signal 1: DAD1 B, Sig=254,4 Ref=off

| Peak # | RetTime [min] | Type | Width [min] | Area [mAU*s] | Height [mAU] | Area %  |
|--------|---------------|------|-------------|--------------|--------------|---------|
| 1      | 12.099        | BB   | 0.4341      | 3913.12769   | 133.46248    | 49.2719 |
| 2      | 17.044        | BBA  | 0.8753      | 4028.77905   | 64.98422     | 50.7281 |

Totals : 7941.90674 198.44670

**Figure S153. HPLC Chromatography of (*S*)-4-Bromo-*N*-(4-((4-methoxyphenyl)amino)-4-oxobutan-2-yl)benzamide (5aj).**

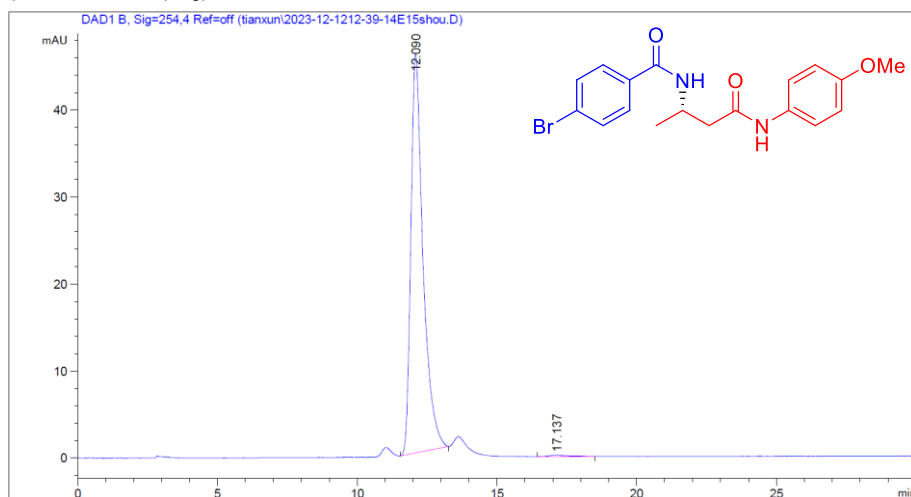

Signal 1: DAD1 B, Sig=254,4 Ref=off

| Peak # | RetTime [min] | Type | Width [min] | Area [mAU*s] | Height [mAU] | Area %  |
|--------|---------------|------|-------------|--------------|--------------|---------|
| 1      | 12.090        | BB   | 0.4418      | 1383.19226   | 45.86885     | 99.3862 |
| 2      | 17.137        | BB   | 0.6171      | 8.54301      | 1.64711e-1   | 0.6138  |

Totals : 1391.73528 46.03356

**Figure S154. HPLC Chromatography of the Racemic *N*-(4-((4-Methoxyphenyl)amino)-4-oxobutan-2-yl)-4-(trifluoromethoxy)benzamide (5ak).**

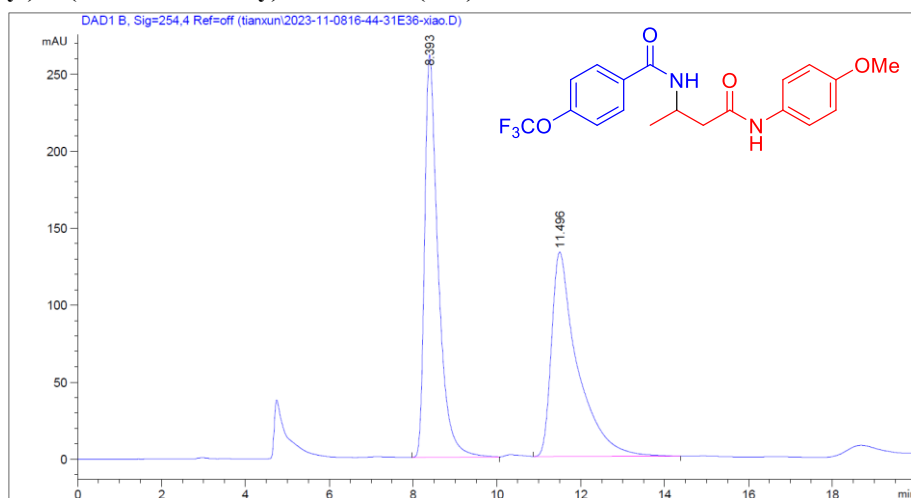

Signal 1: DAD1 B, Sig=254,4 Ref=off

| Peak # | RetTime [min] | Type | Width [min] | Area [mAU*s] | Height [mAU] | Area %  |
|--------|---------------|------|-------------|--------------|--------------|---------|
| 1      | 8.393         | BB   | 0.3296      | 5859.44629   | 261.27921    | 50.5895 |
| 2      | 11.496        | BB   | 0.6069      | 5722.88232   | 132.76945    | 49.4105 |

Totals : 1.15823e4 394.04866

**Figure S155. HPLC Chromatography of (*S*)-*N*-(4-((4-Methoxyphenyl)amino)-4-oxobutan-2-yl)-4-(trifluoromethoxy)benzamide (5ak).**

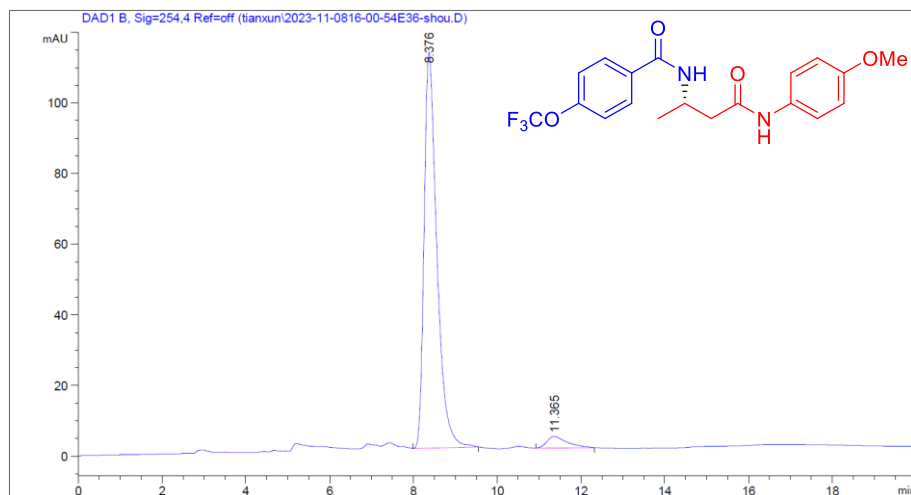

Signal 1: DAD1 B, Sig=254,4 Ref=off

| Peak # | RetTime [min] | Type | Width [min] | Area [mAU*s] | Height [mAU] | Area %  |
|--------|---------------|------|-------------|--------------|--------------|---------|
| 1      | 8.376         | BBA  | 0.3162      | 2363.60889   | 112.02225    | 95.6344 |
| 2      | 11.365        | BBA  | 0.4759      | 107.89490    | 3.26232      | 4.3656  |

Totals : 2471.50378 115.28457

**Figure S156. HPLC Chromatography of the Racemic *N*-(4-((4-Methoxyphenyl)amino)-4-oxobutan-2-yl)-4-((trifluoromethyl)thio)benzamide (5am).**

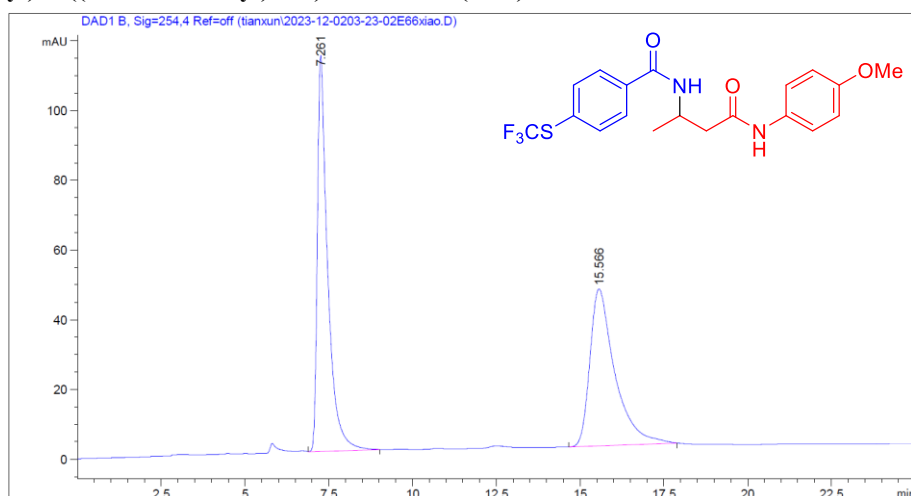

Signal 1: DAD1 B, Sig=254,4 Ref=off

| Peak # | RetTime [min] | Type | Width [min] | Area [mAU*s] | Height [mAU] | Area %  |
|--------|---------------|------|-------------|--------------|--------------|---------|
| 1      | 7.261         | VBA  | 0.3025      | 2419.91187   | 113.61816    | 51.0206 |
| 2      | 15.566        | BBA  | 0.7525      | 2323.09912   | 44.98688     | 48.9794 |

Totals : 4743.01099 158.60503

**Figure S157. HPLC Chromatography of (*S*)-*N*-(4-((4-Methoxyphenyl)amino)-4-oxobutan-2-yl)-4-((trifluoromethyl)thio)benzamide (5am).**

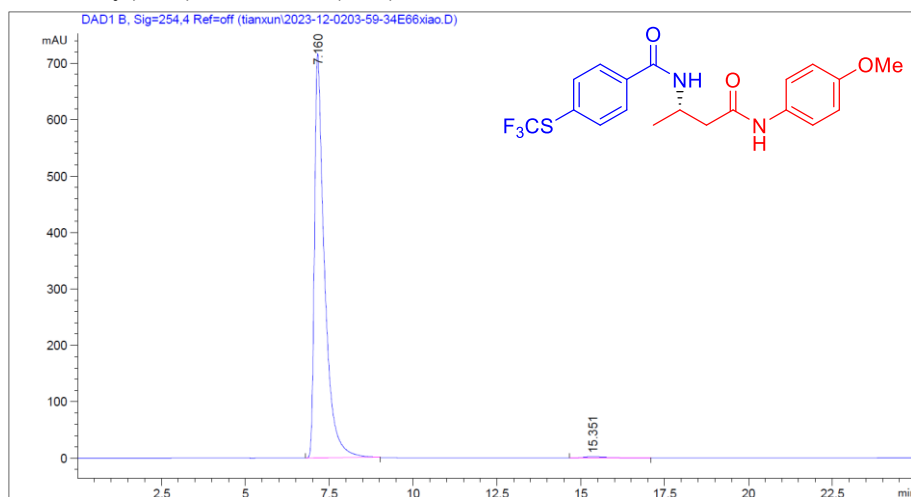

Signal 1: DAD1 B, Sig=254,4 Ref=off

| Peak # | RetTime [min] | Type | Width [min] | Area [mAU*s] | Height [mAU] | Area %  |
|--------|---------------|------|-------------|--------------|--------------|---------|
| 1      | 7.160         | BBA  | 0.2934      | 1.49414e4    | 716.21411    | 99.2955 |
| 2      | 15.351        | BBA  | 0.6538      | 106.00166    | 2.19359      | 0.7045  |

Totals : 1.50474e4 718.40770

**Figure S158. HPLC Chromatography of the Racemic *N*-(4-((4-Methoxyphenyl)amino)-4-oxobutan-2-yl)benzo[d][1,3]dioxole-5-carboxamide (5an).**

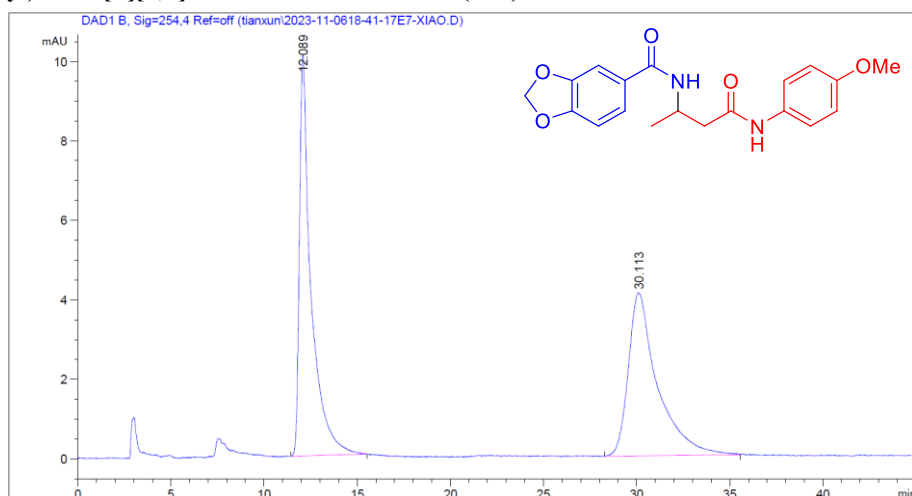

Signal 1: DAD1 B, Sig=254,4 Ref=off

| Peak # | RetTime [min] | Type | Width [min] | Area [mAU*s] | Height [mAU] | Area %  |
|--------|---------------|------|-------------|--------------|--------------|---------|
| 1      | 12.089        | BB   | 0.6057      | 437.52765    | 10.09340     | 49.6600 |
| 2      | 30.113        | BB   | 1.4818      | 443.51807    | 4.10093      | 50.3400 |

Totals : 881.04572 14.19433

**Figure S159. HPLC Chromatography of (*S*)-*N*-(4-((4-Methoxyphenyl)amino)-4-oxobutan-2-yl)benzo[d][1,3]dioxole-5-carboxamide (5an).**

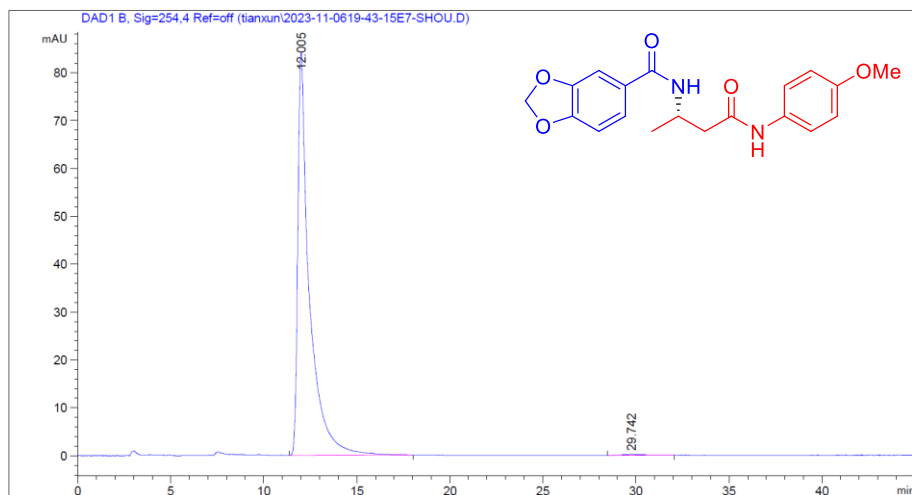

Signal 1: DAD1 B, Sig=254,4 Ref=off

| Peak # | RetTime [min] | Type | Width [min] | Area [mAU*s] | Height [mAU] | Area %  |
|--------|---------------|------|-------------|--------------|--------------|---------|
| 1      | 12.005        | BB   | 0.5959      | 3635.67871   | 84.16940     | 99.5410 |
| 2      | 29.742        | BB   | 1.0434      | 16.76502     | 1.91862e-1   | 0.4590  |

Totals : 3652.44373 84.36127

**Figure S160. HPLC Chromatography of the Racemic *N*-(4-((4-Methoxyphenyl)amino)-4-oxobutan-2-yl)thiophene-2-carboxamide (5a).**

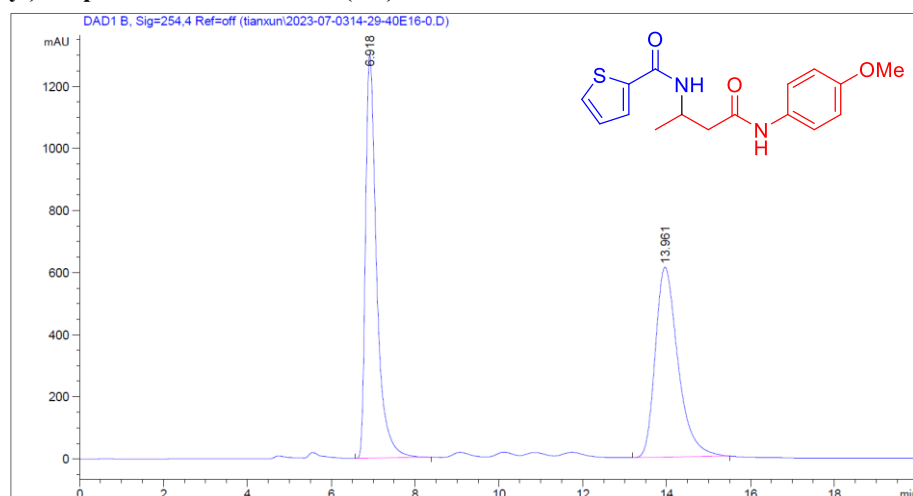

Signal 1: DAD1 B, Sig=254,4 Ref=off

| Peak # | RetTime [min] | Type | Width [min] | Area [mAU*s] | Height [mAU] | Area %  |
|--------|---------------|------|-------------|--------------|--------------|---------|
| 1      | 6.918         | BBA  | 0.2765      | 2.38677e4    | 1297.96741   | 50.8576 |
| 2      | 13.961        | BBA  | 0.5736      | 2.30628e4    | 612.12183    | 49.1424 |

Totals : 4.69305e4 1910.08923

**Figure S161. HPLC Chromatography of (*S*)-*N*-(4-((4-Methoxyphenyl)amino)-4-oxobutan-2-yl)thiophene-2-carboxamide (5a).**

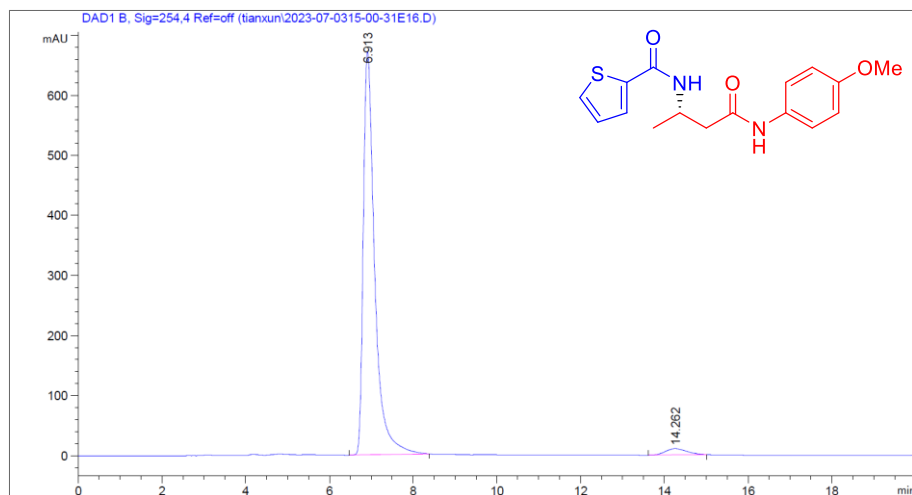

Signal 1: DAD1 B, Sig=254,4 Ref=off

| Peak # | RetTime [min] | Type | Width [min] | Area [mAU*s] | Height [mAU] | Area %  |
|--------|---------------|------|-------------|--------------|--------------|---------|
| 1      | 6.913         | BBA  | 0.2849      | 1.26949e4    | 670.32104    | 97.1797 |
| 2      | 14.262        | BBA  | 0.5319      | 368.42691    | 10.43538     | 2.8203  |

Totals : 1.30633e4 680.75642

**Figure S162. HPLC Chromatography of the Racemic *N*-(4-Methoxyphenyl)-3-pivalamidobutanamide (5ao).**

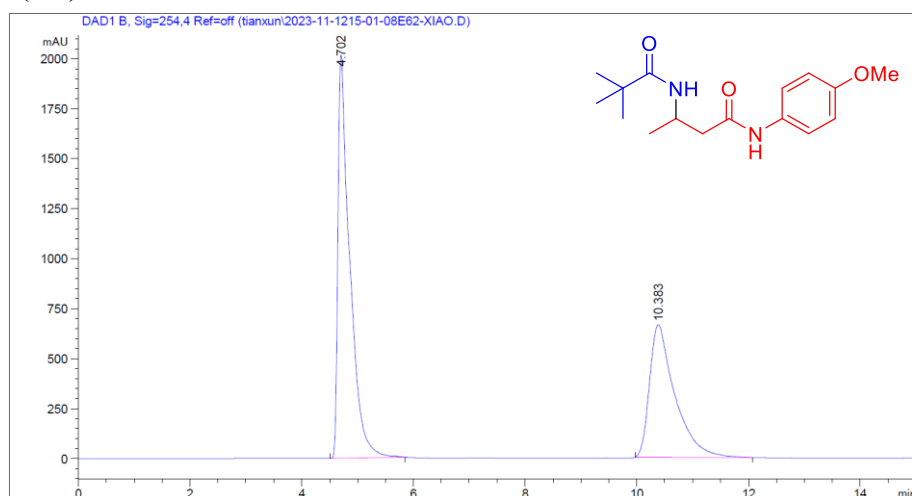

Signal 1: DAD1 B, Sig=254,4 Ref=off

| Peak # | RetTime [min] | Type | Width [min] | Area [mAU*s] | Height [mAU] | Area %  |
|--------|---------------|------|-------------|--------------|--------------|---------|
| 1      | 4.702         | BV R | 0.2003      | 2.94595e4    | 2017.91907   | 58.6690 |
| 2      | 10.383        | BBA  | 0.4498      | 2.07536e4    | 661.90411    | 41.3310 |

Totals : 5.02131e4 2679.82318

**Figure S163. HPLC Chromatography of (*S*)-*N*-(4-Methoxyphenyl)-3-pivalamidobutanamide (5ao).**

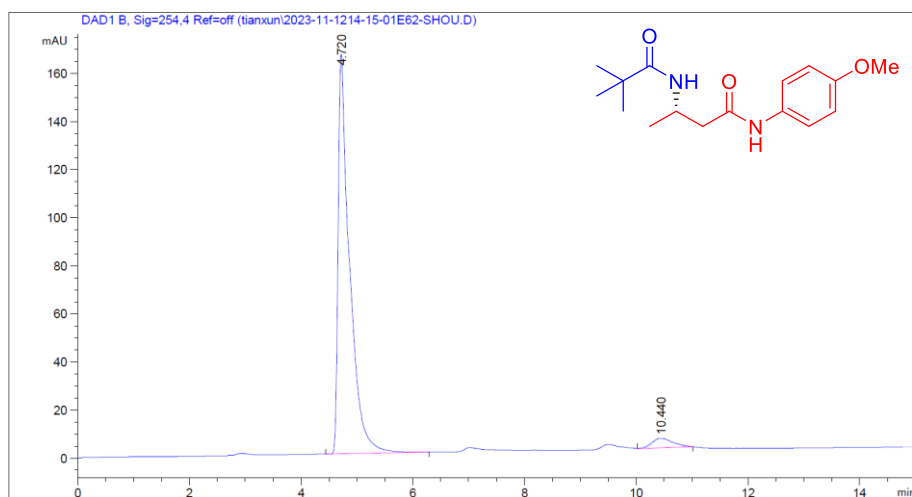

Signal 1: DAD1 B, Sig=254,4 Ref=off

| Peak # | RetTime [min] | Type | Width [min] | Area [mAU*s] | Height [mAU] | Area %  |
|--------|---------------|------|-------------|--------------|--------------|---------|
| 1      | 4.720         | BB   | 0.1960      | 2343.42725   | 166.67308    | 95.6796 |
| 2      | 10.440        | VBA  | 0.3913      | 105.81750    | 4.07076      | 4.3204  |

Totals : 2449.24475 170.74384

**Figure S164. HPLC Chromatography of the Racemic *N*-(4-(Benzylamino)-4-oxobutan-2-yl)benzamide (5ba).**

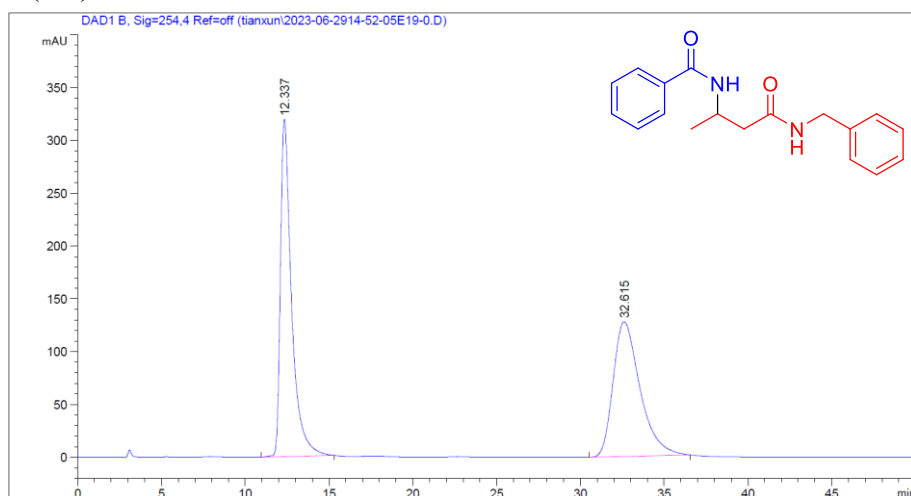

Signal 1: DAD1 B, Sig=254,4 Ref=off

| Peak # | RetTime [min] | Type | Width [min] | Area [mAU*s] | Height [mAU] | Area %  |
|--------|---------------|------|-------------|--------------|--------------|---------|
| 1      | 12.337        | BBA  | 0.6799      | 1.47216e4    | 319.30914    | 50.8710 |
| 2      | 32.615        | BBA  | 1.6813      | 1.42175e4    | 127.46292    | 49.1290 |

Totals : 2.89391e4 446.77206

**Figure S165. HPLC Chromatography of (*S*)-*N*-(4-(Benzylamino)-4-oxobutan-2-yl)benzamide (5ba).**

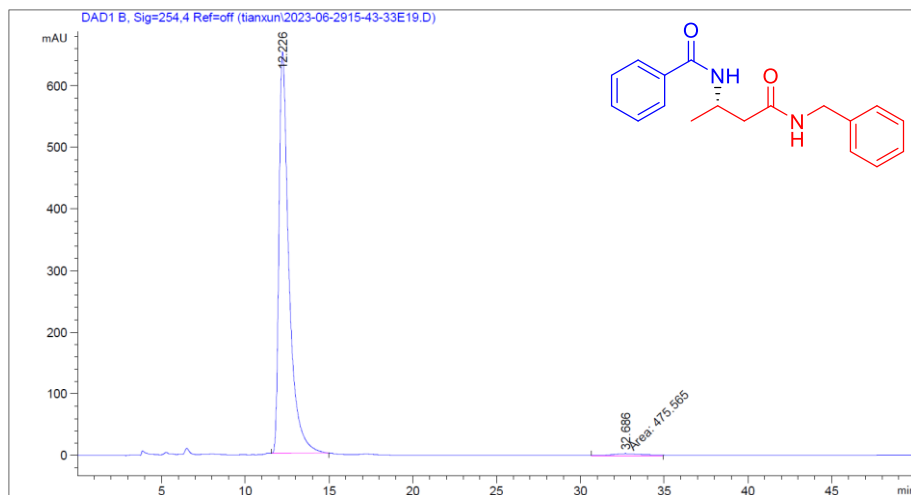

Signal 1: DAD1 B, Sig=254,4 Ref=off

| Peak # | RetTime [min] | Type | Width [min] | Area [mAU*s] | Height [mAU] | Area %  |
|--------|---------------|------|-------------|--------------|--------------|---------|
| 1      | 12.226        | BBA  | 0.6094      | 2.69970e4    | 651.57886    | 98.2689 |
| 2      | 32.686        | MM   | 2.3160      | 475.56491    | 3.42232      | 1.7311  |

Totals : 2.74726e4 655.00118

**Figure S166. HPLC Chromatography of the Racemic *N*-(1-((4-Methoxyphenyl)amino)-1-oxohexan-3-yl)benzamide (5ca)**

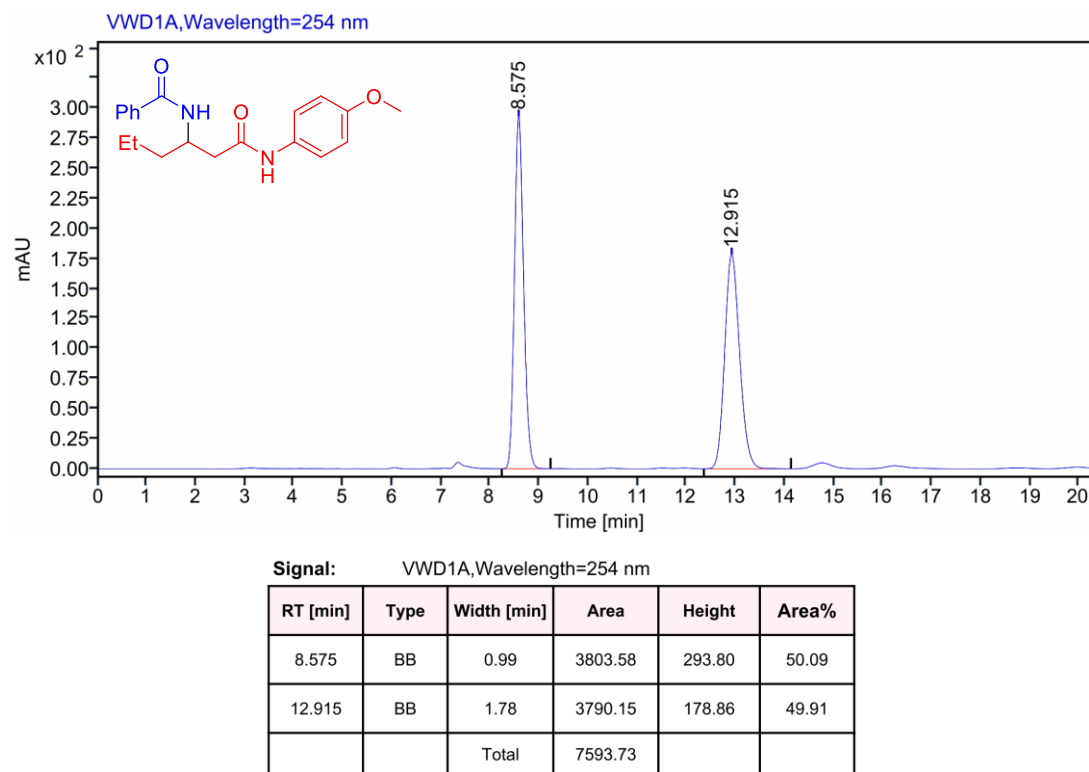

**Figure S167. HPLC Chromatography of (*S*)-*N*-(1-((4-Methoxyphenyl)amino)-1-oxohexan-3-yl)benzamide (5ca)**

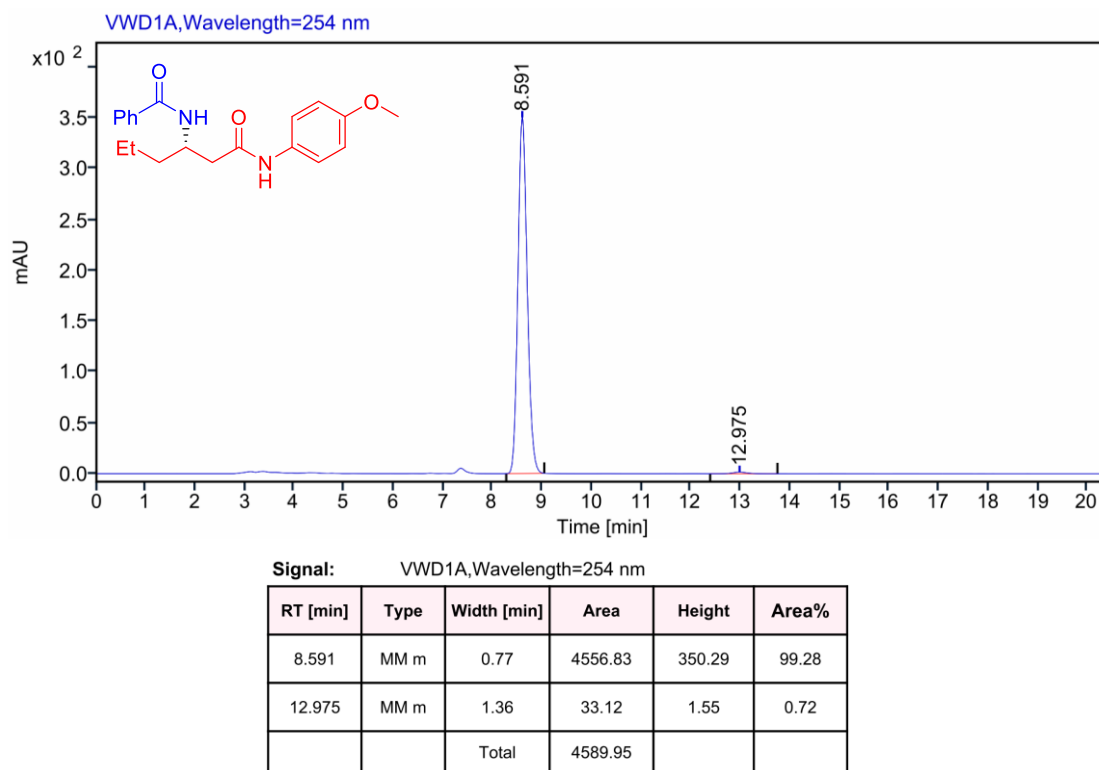

**Figure S168. HPLC Chromatography of the Racemic *N*-(1-((4-Methoxyphenyl)amino)-1-oxoheptan-3-yl)benzamide (5da)**

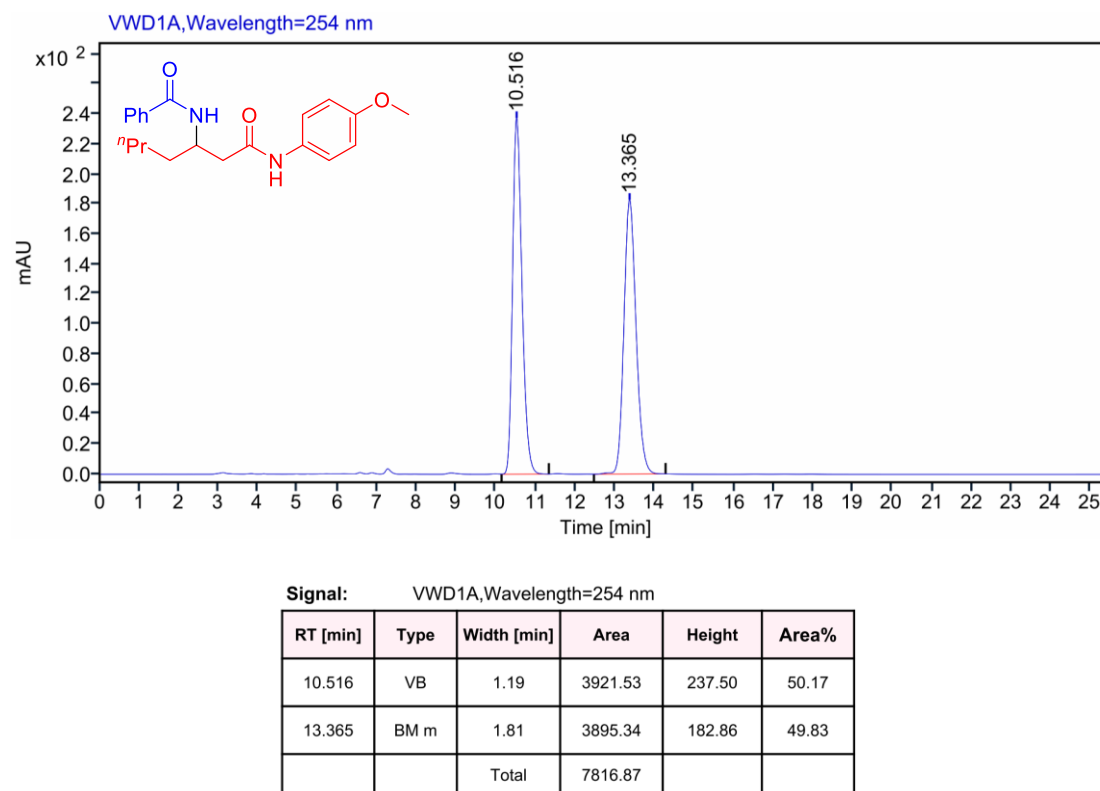

**Figure S169. HPLC Chromatography of (*S*)-*N*-(1-((4-Methoxyphenyl)amino)-1-oxoheptan-3-yl)benzamide (5da)**

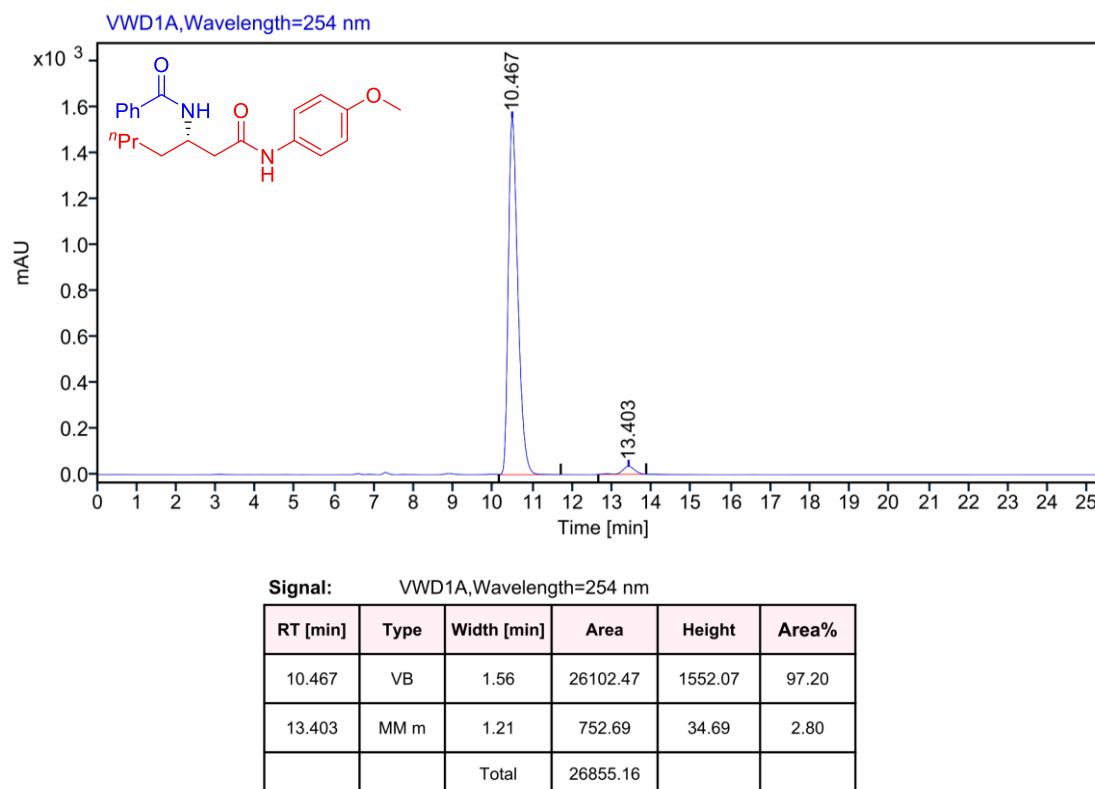

**Figure S170. HPLC Chromatography of the Racemic *N*-(1-((*S*)-2-(6-Methoxynaphthalen-2-yl)propanamido)propan-2-yl)benzamide (6).**

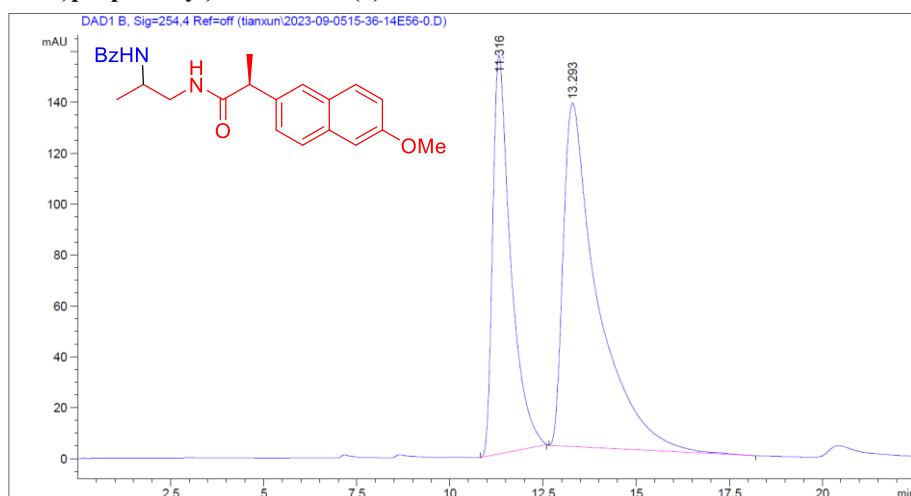

Signal 1: DAD1 B, Sig=254,4 Ref=off

| Peak # | RetTime [min] | Type | Width [min] | Area [mAU*s] | Height [mAU] | Area %  |
|--------|---------------|------|-------------|--------------|--------------|---------|
| 1      | 11.316        | BBA  | 0.4885      | 5267.99219   | 156.57556    | 37.9167 |
| 2      | 13.293        | BB   | 0.9000      | 8625.61816   | 134.89653    | 62.0833 |

Totals : 1.38936e4 291.47209

**Figure S171. HPLC Chromatography of *N*-((*S*)-1-((*S*)-2-(6-Methoxynaphthalen-2-yl)propanamido)propan-2-yl)benzamide (6).**

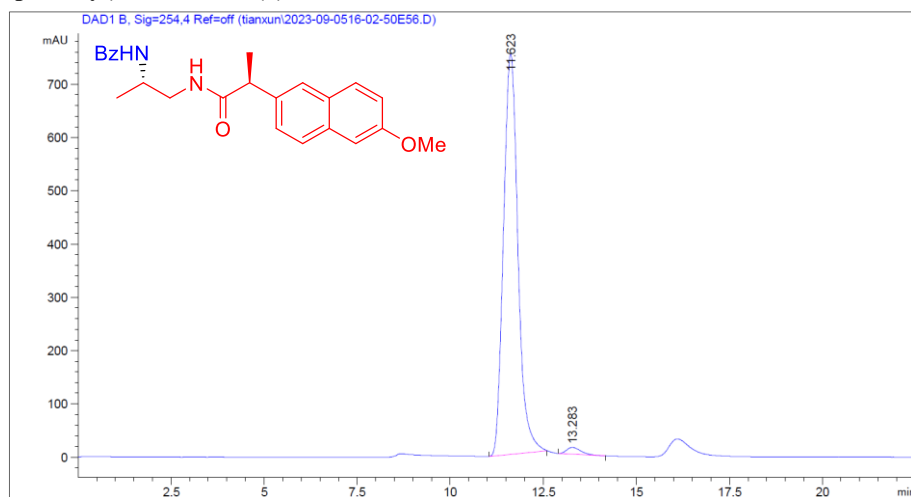

Signal 1: DAD1 B, Sig=254,4 Ref=off

| Peak # | RetTime [min] | Type | Width [min] | Area [mAU*s] | Height [mAU] | Area %  |
|--------|---------------|------|-------------|--------------|--------------|---------|
| 1      | 11.623        | BBA  | 0.4223      | 2.02561e4    | 751.91980    | 98.3591 |
| 2      | 13.283        | BB   | 0.4094      | 337.92648    | 12.74286     | 1.6409  |

Totals : 2.05940e4 764.66266

**Figure S172. HPLC Chromatography of the Racemic *N*-(1-(2-(11-oxo-6,11-Dihydrodibenzo[*b*,*e*]oxepin-3-yl)acetamido)propan-2-yl)benzamide (7).**

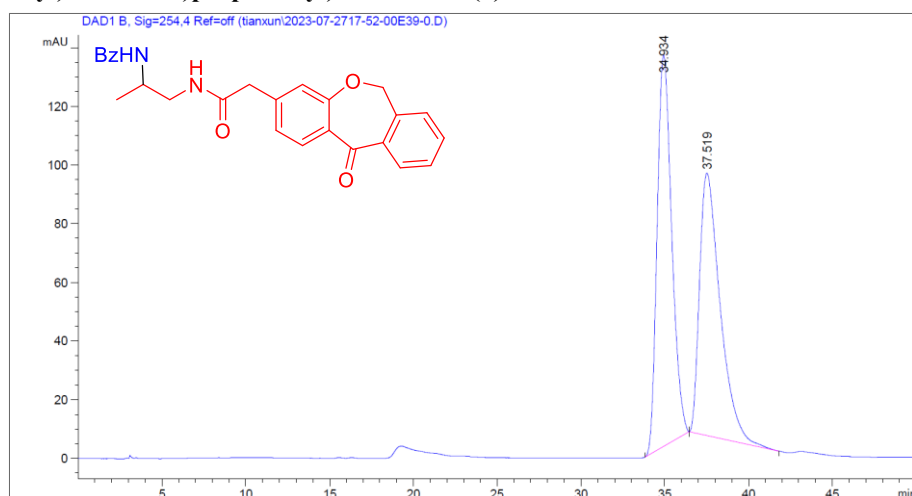

Signal 1: DAD1 B, Sig=254,4 Ref=off

| Peak # | RetTime [min] | Type | Width [min] | Area [mAU*s] | Height [mAU] | Area %  |
|--------|---------------|------|-------------|--------------|--------------|---------|
| 1      | 34.934        | BB   | 0.9332      | 8031.08838   | 133.23552    | 51.3313 |
| 2      | 37.519        | BBA  | 1.2739      | 7614.50293   | 89.38248     | 48.6687 |

Totals : 1.56456e4 222.61800

**Figure S173. HPLC Chromatography of (*S*)-*N*-(1-(2-(11-oxo-6,11-Dihydrodibenzo[*b*,*e*]oxepin-3-yl)acetamido)propan-2-yl)benzamide (7).**

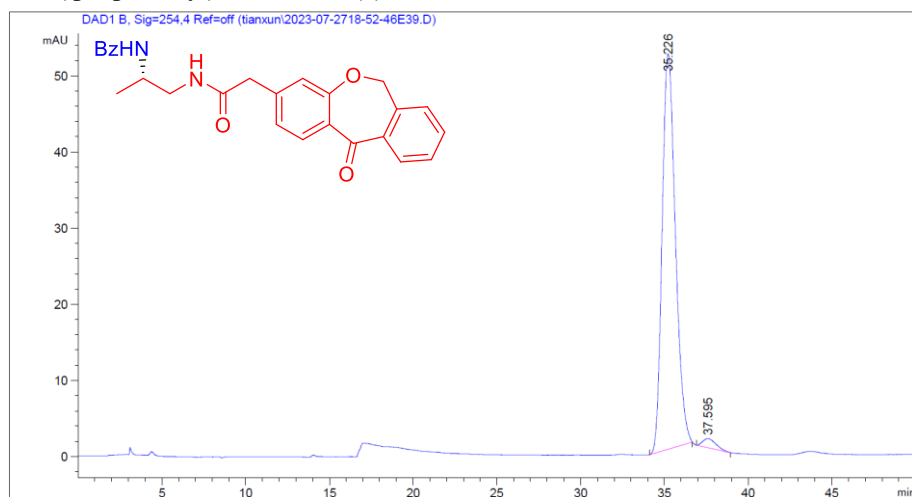

Signal 1: DAD1 B, Sig=254,4 Ref=off

| Peak # | RetTime [min] | Type | Width [min] | Area [mAU*s] | Height [mAU] | Area %  |
|--------|---------------|------|-------------|--------------|--------------|---------|
| 1      | 35.226        | BBA  | 0.8494      | 2853.53882   | 51.90400     | 97.7819 |
| 2      | 37.595        | BB   | 0.6812      | 64.73160     | 1.16331      | 2.2181  |

Totals : 2918.27042 53.06730

**Figure S174. HPLC Chromatography of the Racemic *N*-(1-(2-(1-(4-Chlorobenzoyl)-5-methoxy-2-methyl-1H-indol-3-yl)acetamido)propan-2-yl)benzamide (8).**

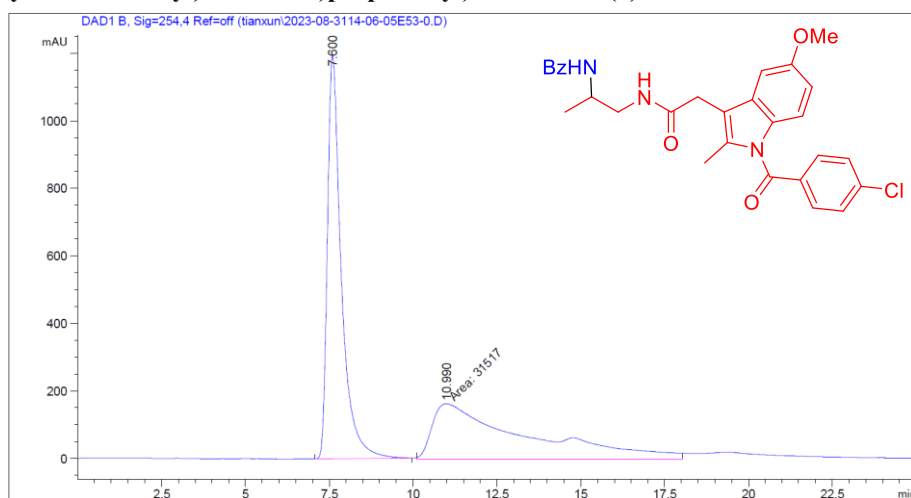

Signal 1: DAD1 B, Sig=254,4 Ref=off

| Peak # | RetTime [min] | Type | Width [min] | Area [mAU*s] | Height [mAU] | Area %  |
|--------|---------------|------|-------------|--------------|--------------|---------|
| 1      | 7.600         | BB   | 0.4219      | 3.44064e4    | 1195.00134   | 52.1915 |
| 2      | 10.990        | MM   | 3.1929      | 3.15170e4    | 164.51656    | 47.8085 |

Totals : 6.59234e4 1359.51790

**Figure S175. HPLC Chromatography of (*S*)-*N*-(1-(2-(1-(4-Chlorobenzoyl)-5-methoxy-2-methyl-1H-indol-3-yl)acetamido)propan-2-yl)benzamide (8).**

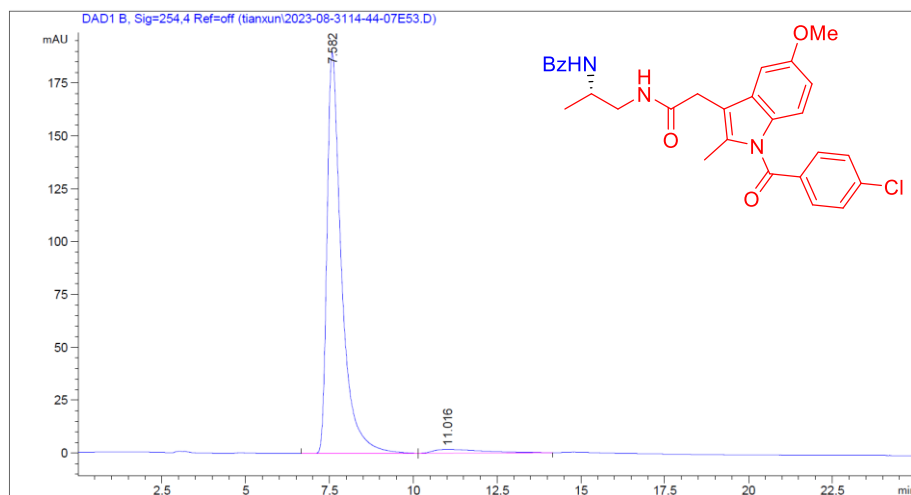

Signal 1: DAD1 B, Sig=254,4 Ref=off

| Peak # | RetTime [min] | Type | Width [min] | Area [mAU*s] | Height [mAU] | Area %  |
|--------|---------------|------|-------------|--------------|--------------|---------|
| 1      | 7.582         | BB   | 0.4432      | 5705.28906   | 189.52417    | 96.7637 |
| 2      | 11.016        | BBA  | 1.2104      | 190.81352    | 1.86391      | 3.2363  |

Totals : 5896.10258 191.38808

**Figure S176. HPLC Chromatography of the Racemic 2-((2-(4-Methoxybenzamido)propyl)carbamoyl)phenyl acetate (9).**

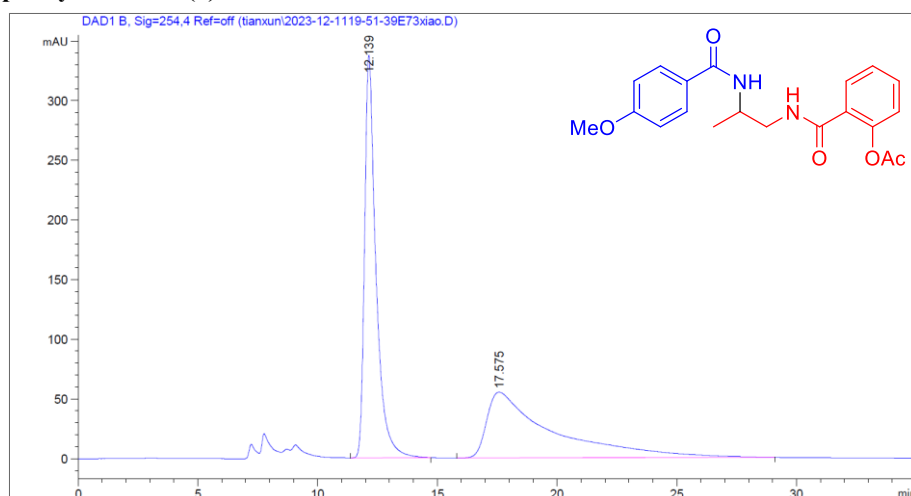

Signal 1: DAD1 B, Sig=254,4 Ref=off

| Peak # | RetTime [min] | Type | Width [min] | Area [mAU*s] | Height [mAU] | Area %  |
|--------|---------------|------|-------------|--------------|--------------|---------|
| 1      | 12.139        | BBA  | 0.4807      | 1.11769e4    | 337.24454    | 51.6134 |
| 2      | 17.575        | BB   | 2.4429      | 1.04782e4    | 55.24165     | 48.3866 |

Totals : 2.16551e4 392.48618

**Figure S177. HPLC Chromatography of (*S*)-2-((2-(4-Methoxybenzamido)propyl)carbamoyl)phenyl acetate (9).**

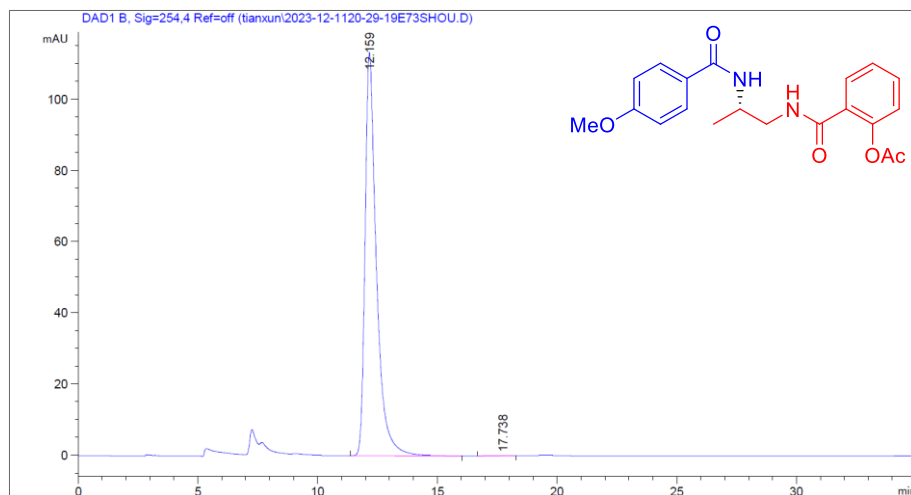

Signal 1: DAD1 B, Sig=254,4 Ref=off

| Peak # | RetTime [min] | Type | Width [min] | Area [mAU*s] | Height [mAU] | Area %  |
|--------|---------------|------|-------------|--------------|--------------|---------|
| 1      | 12.159        | BB   | 0.4802      | 3730.09302   | 113.26410    | 99.8613 |
| 2      | 17.738        | BB   | 0.7580      | 5.18255      | 8.10523e-2   | 0.1387  |

Totals : 3735.27557 113.34515

**Figure S178. HPLC Chromatography of the Racemic 3-(3-(4,5-Diphenyloxazol-2-yl)propanamido)-*N*-(4-methoxyphenyl)butanamide (10).**

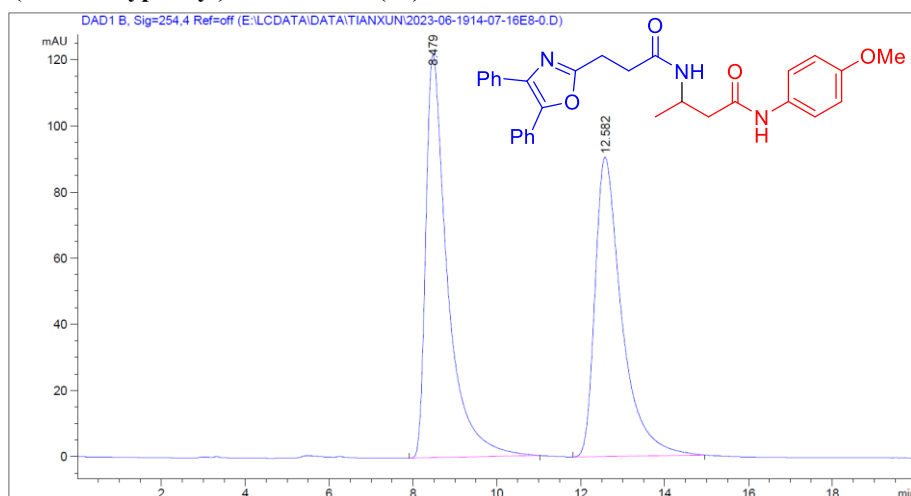

Signal 1: DAD1 B, Sig=254,4 Ref=off

| Peak # | RetTime [min] | Type | Width [min] | Area [mAU*s] | Height [mAU] | Area %  |
|--------|---------------|------|-------------|--------------|--------------|---------|
| 1      | 8.479         | BBA  | 0.5227      | 4372.91992   | 121.85932    | 52.2196 |
| 2      | 12.582        | BBA  | 0.6541      | 4001.17041   | 90.44542     | 47.7804 |

Totals : 8374.09033 212.30474

**Figure S179. HPLC Chromatography of (*S*)-3-(3-(4,5-Diphenyloxazol-2-yl)propanamido)-*N*-(4-methoxyphenyl)butanamide (10).**

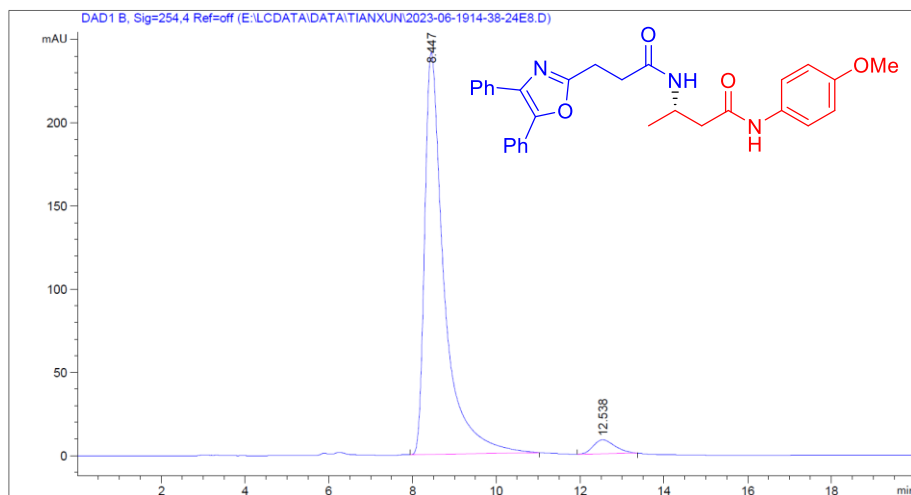

Signal 1: DAD1 B, Sig=254,4 Ref=off

| Peak # | RetTime [min] | Type | Width [min] | Area [mAU*s] | Height [mAU] | Area %  |
|--------|---------------|------|-------------|--------------|--------------|---------|
| 1      | 8.447         | BBA  | 0.4709      | 7806.74121   | 241.65436    | 96.2610 |
| 2      | 12.538        | BBA  | 0.5430      | 303.23257    | 8.40382      | 3.7390  |

Totals : 8109.97379 250.05818

**Figure S180. HPLC Chromatography of the Racemic 3-((*S*)-2-(4-Isobutylphenyl)propanamido)-*N*-(4-methoxyphenyl)butanamide (11).**

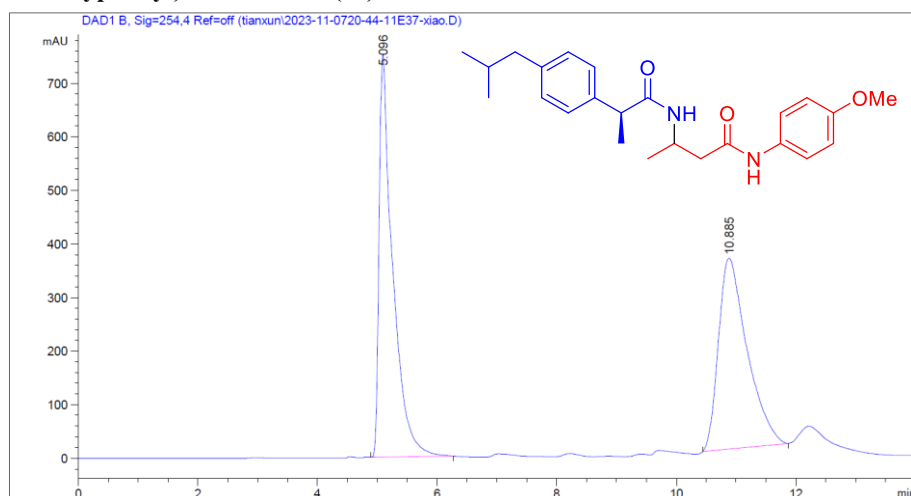

Signal 1: DAD1 B, Sig=254,4 Ref=off

| Peak # | RetTime [min] | Type | Width [min] | Area [mAU*s] | Height [mAU] | Area %  |
|--------|---------------|------|-------------|--------------|--------------|---------|
| 1      | 5.096         | BBA  | 0.2179      | 1.18429e4    | 751.14294    | 49.9788 |
| 2      | 10.885        | BBA  | 0.4903      | 1.18530e4    | 356.08624    | 50.0212 |

Totals : 2.36959e4 1107.22919

**Figure S181. HPLC Chromatography of (*S*)-3-((*S*)-2-(4-Isobutylphenyl)propanamido)-*N*-(4-methoxyphenyl)butanamide (11).**

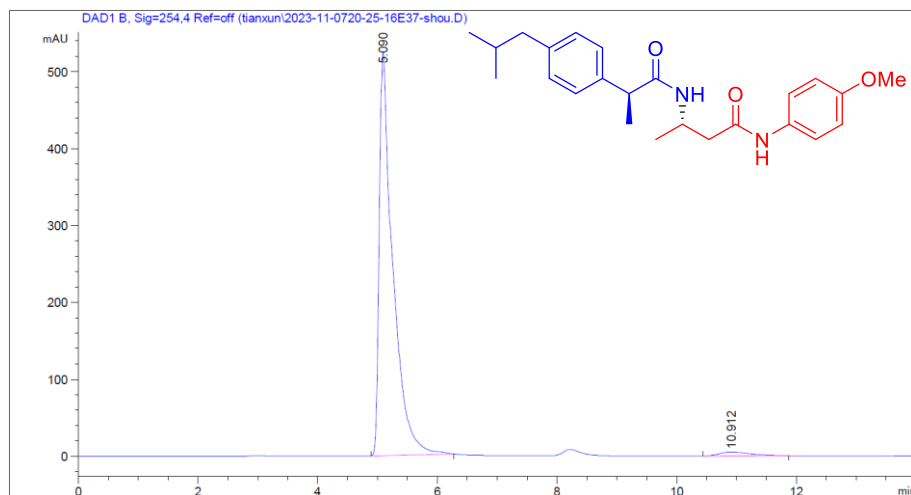

Signal 1: DAD1 B, Sig=254,4 Ref=off

| Peak # | RetTime [min] | Type | Width [min] | Area [mAU*s] | Height [mAU] | Area %  |
|--------|---------------|------|-------------|--------------|--------------|---------|
| 1      | 5.090         | BBA  | 0.2174      | 8243.94238   | 524.38672    | 97.8475 |
| 2      | 10.912        | BBA  | 0.5326      | 181.35062    | 5.05427      | 2.1525  |

Totals : 8425.29300 529.44098

**Figure S182. HPLC Chromatography of the Racemic *N,N'*-(Propane-1,2-diyl)dinicotinamide (Nicaraven).**

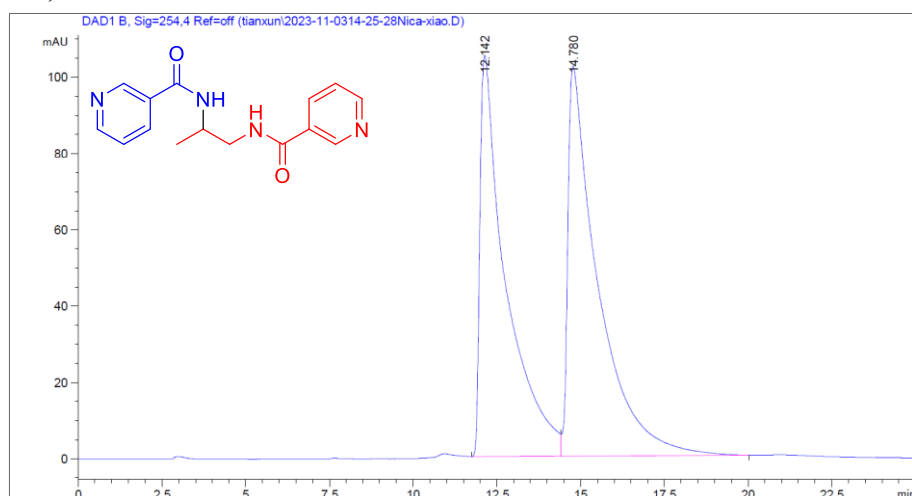

Signal 1: DAD1 B, Sig=254,4 Ref=off

| Peak # | RetTime [min] | Type | Width [min] | Area [mAU*s] | Height [mAU] | Area %  |
|--------|---------------|------|-------------|--------------|--------------|---------|
| 1      | 12.142        | BV   | 0.7236      | 5617.49805   | 105.09461    | 46.9144 |
| 2      | 14.780        | VB   | 0.8386      | 6356.44189   | 102.06170    | 53.0856 |

Totals : 1.19739e4 207.15631

**Figure S183. HPLC Chromatography of (*S*)-*N,N'*-(Propane-1,2-diyl)dinicotinamide ((*S*)-Nicaraven).**

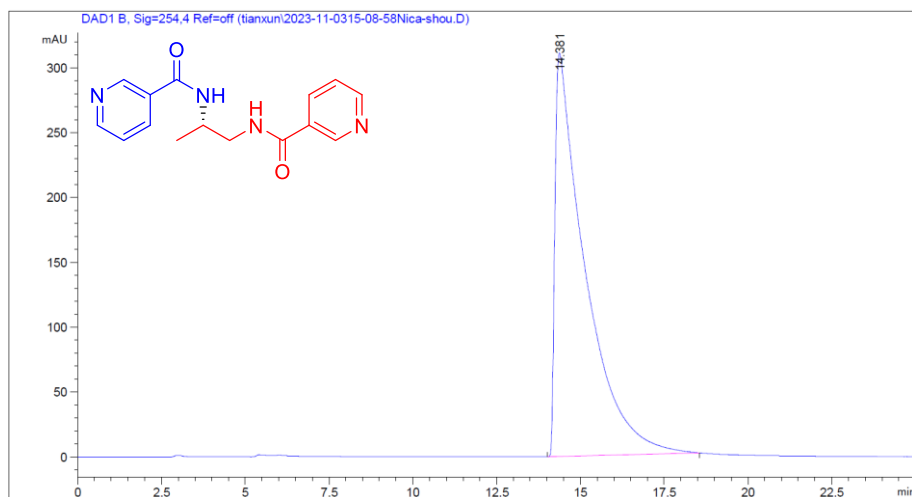

Signal 1: DAD1 B, Sig=254,4 Ref=off

| Peak # | RetTime [min] | Type | Width [min] | Area [mAU*s] | Height [mAU] | Area %   |
|--------|---------------|------|-------------|--------------|--------------|----------|
| 1      | 14.381        | BBA  | 0.8206      | 1.93085e4    | 310.89749    | 100.0000 |

Totals : 1.93085e4 310.89749
